# Supplementary material for: Gain-of-function PfAAT1 mutations compensate for impaired PfCRT function in Plasmodium falciparum
Source: Research Square preprint supplement (doi:10.21203/rs.3.rs-9887667/v1), 2026-06-15
Supplement: Supplementary file 1 [file a87ebaf499e8709fff293146.xlsx]

## Sheet: pf-haploatlas-PF3D7_0629500_sam
	Sample	Study	Country	Admin level 1	Country latitude	Country longitude	Admin level 1 latitude	Admin level 1 longitude	Year	Population	ns_changes PfAAT1	Sample crt	ns_changes crt
3070	PT0261-C	1022-PF-MW-OCHOLLA	Malawi	Chikwawa	-13.2151	34.3005	-16.1644	34.7089	2011	AF-E	Y97C	PT0261-C
4004	QQ0109-C	1100-PF-CI-YAVO	CÃ´te d'Ivoire	Abidjan	7.62554	-5.55445	5.4203	-4.06498	2014	AF-W	W523C	QQ0109-C
10755	SPT34759	1241-PF-GH-ANINAGYEI	Ghana	Eastern	7.96678	-1.21071	6.41276	-0.450589	2018	AF-W	V545A	SPT34759
1323	PF0127-C	1017-PF-GH-AMENGA-ETEGO	Ghana	Upper East	7.96678	-1.21071	10.7777	-0.820531	2009	AF-W	V428I	PF0127-C
2889	SPT53621	1227-PF-PE-VALDIVIA	Colombia	Norte de Santander	3.90258	-73.0867	8.07747	-72.8893	2019	SA	V231D/P446A	SPT53621	C72S/K76T/A220S/N326D/I356L
2890	SPT67853	1227-PF-PE-VALDIVIA	Colombia	Norte de Santander	3.90258	-73.0867	8.07747	-72.8893	2019	SA	V231D/P446A	SPT67853	C72S/K76T/A220S/N326D/I356L
2891	SPT67854	1227-PF-PE-VALDIVIA	Colombia	Norte de Santander	3.90258	-73.0867	8.07747	-72.8893	2020	SA	V231D/P446A	SPT67854	C72S/K76T/A220S/N326D/I356L
10379	PP0014-C	1013-PF-PEGB-BRANCH	Peru	Loreto	-9.17234	-74.3568	-4.12382	-74.4241	2011	SA	V231D/P446A	PP0014-C	C72S/K76T/A220S/N326D/I356L
12181	PP0015-C	1013-PF-PEGB-BRANCH	Peru	Loreto	-9.17234	-74.3568	-4.12382	-74.4241	2011	SA	V231D/P446A	PP0015-C	C72S/K76T/A220S/N326D/I356L
11418	PP0016-C	1013-PF-PEGB-BRANCH	Peru	Loreto	-9.17234	-74.3568	-4.12382	-74.4241	2011	SA	V231D/P446A	PP0016-C	C72S/K76T/A220S/N326D/I356L
11845	SPT43463	1227-PF-PE-VALDIVIA	Peru	Loreto	-9.17234	-74.3568	-4.12382	-74.4241	2016	SA	V231D/P446A	SPT43463	K76T/A220S/N326D/T342A/I356L
13755	SPT36952	1227-PF-PE-VALDIVIA	Peru	Loreto	-9.17234	-74.3568	-4.12382	-74.4241	2018	SA	V231D/P446A	SPT36952	C72S/K76T/A220S/N326D/I356L
14535	SPT42774	1254-PF-PE-NOLASCO-SM	Peru	Loreto	-9.17234	-74.3568	-4.12382	-74.4241	2018	SA	V231D/P446A	SPT42774	C72S/K76T/A220S/N326D/I356L
14536	SPT26229	1169-PF-CO-CORREDOR	Venezuela	Bolivar	7.13269	-66.1459	6.21331	-63.4863	2016	SA	V231D/P446A	SPT26229	C72S/K76T/A220S/N326D/I356L
2905	PR0003-CW	1031-PF-SEA-PLOWE	Bangladesh	Chittagong	23.8368	90.2774	22.7121	91.7303	2008	AS-S-FE	V231D	PR0003-CW	M74I/N75E/K76T/A220S/Q271E/I356T/R371I
2893	RCN00764	1148-PF-BD-MAUDE	Bangladesh	Chittagong	23.8368	90.2774	22.7121	91.7303	2015	AS-S-FE	V231D	RCN00764	M74I/N75E/K76T/A220S/Q271E/I356T/R371I
2894	RCN00934	1148-PF-BD-MAUDE	Bangladesh	Chittagong	23.8368	90.2774	22.7121	91.7303	2015	AS-S-FE	V231D	RCN00934	M74I/N75E/K76T/A220S/Q271E/N326S/I356T/R371I
2883	RCN00973	1148-PF-BD-MAUDE	Bangladesh	Chittagong	23.8368	90.2774	22.7121	91.7303	2015	AS-S-FE	V231D	RCN00973	M74I/N75E/K76T/A220S/Q271E/N326S/I356T/R371I
2884	RCN03058	1148-PF-BD-MAUDE	Bangladesh	Chittagong	23.8368	90.2774	22.7121	91.7303	2016	AS-S-FE	V231D	RCN03058	M74I/N75E/K76T/A220S/Q271E/I356T/R371I
2887	RCN03059	1148-PF-BD-MAUDE	Bangladesh	Chittagong	23.8368	90.2774	22.7121	91.7303	2016	AS-S-FE	V231D	RCN03059	M74I/N75E/K76T/A220S/Q271E/I356T/R371I
2888	RCN03086	1148-PF-BD-MAUDE	Bangladesh	Chittagong	23.8368	90.2774	22.7121	91.7303	2016	AS-S-FE	V231D	RCN03086	M74I/N75E/K76T/A220S/Q271E/I356T/R371I
3407	SPT67852	1227-PF-PE-VALDIVIA	Colombia	Norte de Santander	3.90258	-73.0867	8.07747	-72.8893	2019	SA	V231D	SPT67852	N75E/K76T/H97Q/A220S/R371T
4297	SPT40799	1168-PF-GH-AMENGA-ETEGO-SM	Ghana	Upper East	7.96678	-1.21071	10.7777	-0.820531	2018	AF-W	V231D	SPT40799
4380	QC0308-C	1052-PF-TRAC-WHITE	Myanmar	Kachin	21.1171	96.5102	26.0738	97.3474	2014	AS-SE-W	V231D	QC0308-C	M74I/N75E/K76T/A220S/Q271E/N326S/I356T/R371I
4393	SPT41867	1183-PF-GH-AWANDARE-SM	Nigeria	Lagos	9.59227	8.09758	6.52706	3.56495	2017	AF-W	V231D	SPT41867
5033	PP0019-C	1145-PF-PE-GAMBOA	Peru	Loreto	-9.17234	-74.3568	-4.12382	-74.4241	2009	SA	V231D	PP0019-C	C72S/K76T/A220S/N326D/I356L
5034	PP0020-C	1145-PF-PE-GAMBOA	Peru	Loreto	-9.17234	-74.3568	-4.12382	-74.4241	2009	SA	V231D	PP0020-C	C72S/K76T/A220S/N326D/I356L
5046	PP0004-C	1013-PF-PEGB-BRANCH	Peru	Loreto	-9.17234	-74.3568	-4.12382	-74.4241	2011	SA	V231D	PP0004-C	C72S/K76T/A220S/N326D/I356L
13753	PP0005-C	1013-PF-PEGB-BRANCH	Peru	Loreto	-9.17234	-74.3568	-4.12382	-74.4241	2011	SA	V231D	PP0005-C	C72S/K76T/A220S/N326D/I356L
13754	PP0012-C	1013-PF-PEGB-BRANCH	Peru	Loreto	-9.17234	-74.3568	-4.12382	-74.4241	2011	SA	V231D	PP0012-C	C72S/K76T/A220S/N326D/I356L
11411	PP0013-C	1013-PF-PEGB-BRANCH	Peru	Loreto	-9.17234	-74.3568	-4.12382	-74.4241	2011	SA	V231D	PP0013-C	C72S/K76T/A220S/N326D/I356L
11412	SPT53617	1227-PF-PE-VALDIVIA	Peru	Loreto	-9.17234	-74.3568	-4.12382	-74.4241	2017	SA	V231D	SPT53617	C72S/K76T/A220S/N326D/I356L
11413	SPT53618	1227-PF-PE-VALDIVIA	Peru	Loreto	-9.17234	-74.3568	-4.12382	-74.4241	2017	SA	V231D	SPT53618	C72S/K76T/A220S/N326D/I356L
11414	SPT36928	1227-PF-PE-VALDIVIA	Peru	Loreto	-9.17234	-74.3568	-4.12382	-74.4241	2018	SA	V231D	SPT36928	C72S/K76T/A220S/N326D/I356L
11415	SPT36932	1227-PF-PE-VALDIVIA	Peru	Loreto	-9.17234	-74.3568	-4.12382	-74.4241	2018	SA	V231D	SPT36932	C72S/K76T/A220S/N326D/I356L
11416	SPT36937	1227-PF-PE-VALDIVIA	Peru	Loreto	-9.17234	-74.3568	-4.12382	-74.4241	2018	SA	V231D	SPT36937	C72S/K76T/A220S/N326D/I356L
11417	SPT36939	1227-PF-PE-VALDIVIA	Peru	Loreto	-9.17234	-74.3568	-4.12382	-74.4241	2018	SA	V231D	SPT36939	C72S/K76T/A220S/N326D/I356L
11419	SPT36940	1227-PF-PE-VALDIVIA	Peru	Loreto	-9.17234	-74.3568	-4.12382	-74.4241	2018	SA	V231D	SPT36940	C72S/K76T/A220S/N326D/I356L
11420	SPT36941	1227-PF-PE-VALDIVIA	Peru	Loreto	-9.17234	-74.3568	-4.12382	-74.4241	2018	SA	V231D	SPT36941	C72S/K76T/A220S/N326D/I356L
11421	SPT36942	1227-PF-PE-VALDIVIA	Peru	Loreto	-9.17234	-74.3568	-4.12382	-74.4241	2018	SA	V231D	SPT36942	C72S/K76T/A220S/N326D/I356L
11422	SPT36953	1227-PF-PE-VALDIVIA	Peru	Loreto	-9.17234	-74.3568	-4.12382	-74.4241	2018	SA	V231D	SPT36953	C72S/K76T/A220S/N326D/I356L
11423	SPT36955	1227-PF-PE-VALDIVIA	Peru	Loreto	-9.17234	-74.3568	-4.12382	-74.4241	2018	SA	V231D	SPT36955	C72S/K76T/A220S/N326D/I356L
11424	SPT36957	1227-PF-PE-VALDIVIA	Peru	Loreto	-9.17234	-74.3568	-4.12382	-74.4241	2018	SA	V231D	SPT36957	C72S/K76T/A220S/N326D/I356L
11841	SPT36959	1227-PF-PE-VALDIVIA	Peru	Loreto	-9.17234	-74.3568	-4.12382	-74.4241	2018	SA	V231D	SPT36959	C72S/K76T/A220S/N326D/I356L
11842	SPT36967	1227-PF-PE-VALDIVIA	Peru	Loreto	-9.17234	-74.3568	-4.12382	-74.4241	2018	SA	V231D	SPT36967	C72S/K76T/A220S/N326D/I356L
11843	SPT36968	1227-PF-PE-VALDIVIA	Peru	Loreto	-9.17234	-74.3568	-4.12382	-74.4241	2018	SA	V231D	SPT36968	C72S/K76T/A220S/N326D/I356L
11844	SPT42760	1254-PF-PE-NOLASCO-SM	Peru	Loreto	-9.17234	-74.3568	-4.12382	-74.4241	2018	SA	V231D	SPT42760	C72S/K76T/A220S/N326D/I356L
11846	SPT42764	1254-PF-PE-NOLASCO-SM	Peru	Loreto	-9.17234	-74.3568	-4.12382	-74.4241	2018	SA	V231D	SPT42764	C72S/K76T/A220S/N326D/I356L
12182	SPT42769	1254-PF-PE-NOLASCO-SM	Peru	Loreto	-9.17234	-74.3568	-4.12382	-74.4241	2018	SA	V231D	SPT42769	C72S/K76T/A220S/N326D/I356L
12183	SPT42771	1254-PF-PE-NOLASCO-SM	Peru	Loreto	-9.17234	-74.3568	-4.12382	-74.4241	2018	SA	V231D	SPT42771	C72S/K76T/A220S/N326D/I356L
12184	SPT42809	1254-PF-PE-NOLASCO-SM	Peru	Loreto	-9.17234	-74.3568	-4.12382	-74.4241	2018	SA	V231D	SPT42809	C72S/K76T/A220S/N326D/I356L
12185	SPT43471	1227-PF-PE-VALDIVIA	Peru	Loreto	-9.17234	-74.3568	-4.12382	-74.4241	2018	SA	V231D	SPT43471	C72S/K76T/A220S/N326D/I356L
12186	SPT43479	1227-PF-PE-VALDIVIA	Peru	Loreto	-9.17234	-74.3568	-4.12382	-74.4241	2018	SA	V231D	SPT43479	C72S/K76T/A220S/N326D/I356L
12187	SPT43481	1227-PF-PE-VALDIVIA	Peru	Loreto	-9.17234	-74.3568	-4.12382	-74.4241	2018	SA	V231D	SPT43481	C72S/K76T/A220S/N326D/I356L
12188	SPT43483	1227-PF-PE-VALDIVIA	Peru	Loreto	-9.17234	-74.3568	-4.12382	-74.4241	2018	SA	V231D	SPT43483	C72S/K76T/A220S/N326D/I356L
12189	SPT43485	1227-PF-PE-VALDIVIA	Peru	Loreto	-9.17234	-74.3568	-4.12382	-74.4241	2018	SA	V231D	SPT43485	C72S/K76T/A220S/N326D/I356L
14534	SPT43488	1227-PF-PE-VALDIVIA	Peru	Loreto	-9.17234	-74.3568	-4.12382	-74.4241	2018	SA	V231D	SPT43488	C72S/K76T/A220S/N326D/I356L
11807	SPT43489	1227-PF-PE-VALDIVIA	Peru	Loreto	-9.17234	-74.3568	-4.12382	-74.4241	2018	SA	V231D	SPT43489	C72S/K76T/A220S/N326D/I356L
11570	SPT43491	1227-PF-PE-VALDIVIA	Peru	Loreto	-9.17234	-74.3568	-4.12382	-74.4241	2018	SA	V231D	SPT43491	C72S/K76T/A220S/N326D/I356L
11636	SPT40981	1168-PF-GH-AMENGA-ETEGO-SM	Ghana	Upper East	7.96678	-1.21071	10.7777	-0.820531	2018	AF-W	V137L	SPT40981
2989	SPT15108	1200-PF-GH-MAIGA-SM	Ghana	Ashanti	7.96678	-1.21071	6.80362	-1.44857	2014	AF-W	T98I	SPT15108
9193	SPT12536	1168-PF-GH-AMENGA-ETEGO-SM	Ghana	Upper East	7.96678	-1.21071	10.7777	-0.820531	2016	AF-W	T98I	SPT12536
9066	SPT19612	1168-PF-GH-AMENGA-ETEGO-SM	Ghana	Upper East	7.96678	-1.21071	10.7777	-0.820531	2017	AF-W	T98I	SPT19612
9937	SPT41099	1168-PF-GH-AMENGA-ETEGO-SM	Ghana	Upper East	7.96678	-1.21071	10.7777	-0.820531	2018	AF-W	T98I	SPT41099
11701	PT0101-C	1022-PF-MW-OCHOLLA	Malawi	Chikwawa	-13.2151	34.3005	-16.1644	34.7089	2011	AF-E	T98I	PT0101-C
10797	SPT34824	1241-PF-GH-ANINAGYEI	Ghana	Greater Accra	7.96678	-1.21071	5.82175	0.0658734	2018	AF-W	T33I	SPT34824
9680	SPT17069	1168-PF-GH-AMENGA-ETEGO-SM	Ghana	Upper East	7.96678	-1.21071	10.7777	-0.820531	2016	AF-W	T282N	SPT17069
10026	SPT20005	1168-PF-GH-AMENGA-ETEGO-SM	Ghana	Upper East	7.96678	-1.21071	10.7777	-0.820531	2017	AF-W	T282N	SPT20005
10073	SPT20563	1168-PF-GH-AMENGA-ETEGO-SM	Ghana	Upper East	7.96678	-1.21071	10.7777	-0.820531	2017	AF-W	T282N	SPT20563
10615	SPT34416	1168-PF-GH-AMENGA-ETEGO-SM	Ghana	Upper East	7.96678	-1.21071	10.7777	-0.820531	2017	AF-W	T282N	SPT34416
11262	SPT36525	1241-PF-GH-ANINAGYEI	Ghana	Greater Accra	7.96678	-1.21071	5.82175	0.0658734	2018	AF-W	T282N	SPT36525
11637	SPT40982	1168-PF-GH-AMENGA-ETEGO-SM	Ghana	Upper East	7.96678	-1.21071	10.7777	-0.820531	2018	AF-W	T282N	SPT40982
12259	SPT43865	1168-PF-GH-AMENGA-ETEGO-SM	Ghana	Upper East	7.96678	-1.21071	10.7777	-0.820531	2018	AF-W	T282N	SPT43865
12429	SPT44735	1168-PF-GH-AMENGA-ETEGO-SM	Ghana	Upper East	7.96678	-1.21071	10.7777	-0.820531	2018	AF-W	T282N	SPT44735
14135	SPT55440	1234-PF-MZ-MAYOR	Mozambique	Cabo Delgado	-17.2596	35.5514	-12.4586	39.3667	2018	AF-E	T282N	SPT55440
12347	SPT44553	1168-PF-GH-AMENGA-ETEGO-SM	Ghana	Upper East	7.96678	-1.21071	10.7777	-0.820531	2018	AF-W	T145S	SPT44553
12487	SPT45014	1168-PF-GH-AMENGA-ETEGO-SM	Ghana	Upper East	7.96678	-1.21071	10.7777	-0.820531	2018	AF-W	S90I	SPT45014
1776	PF1226-CW	1151-PF-GH-AMENGA-ETEGO	Ghana	Upper East	7.96678	-1.21071	10.7777	-0.820531	2015	AF-W	S87P	PF1226-CW
10182	SPT22467	1168-PF-GH-AMENGA-ETEGO-SM	Ghana	Upper East	7.96678	-1.21071	10.7777	-0.820531	2017	AF-W	S87P	SPT22467
10186	SPT22480	1168-PF-GH-AMENGA-ETEGO-SM	Ghana	Upper East	7.96678	-1.21071	10.7777	-0.820531	2017	AF-W	S87P	SPT22480
110	PA0141-C	1026-PF-GN-CONWAY	Guinea	Nzerekore	10.4363	-10.937	8.43732	-8.89906	2011	AF-W	S87L	PA0141-C
9549	SPT16778	1131-PF-BJ-BERTIN	Benin	Littoral	9.65422	2.33971	6.36469	2.41179	2016	AF-W	S43I/S258L	SPT16778	M74I/N75E/K76T/A220S/Q271E/R371I
9550	SPT16782	1131-PF-BJ-BERTIN	Benin	Littoral	9.65422	2.33971	6.36469	2.41179	2016	AF-W	S43I/S258L	SPT16782	M74I/N75E/K76T/A220S/Q271E/R371I
1314	QQ0088-C	1100-PF-CI-YAVO	CÃ´te d'Ivoire	Abidjan	7.62554	-5.55445	5.4203	-4.06498	2013	AF-W	S43I	QQ0088-C
10849	SPT34955	1162-PF-GM-NGWA-SM	Gambia	North Bank	13.4515	-15.3729	13.5074	-16.0085	1984	AF-W	S43I	SPT34955
1291	PF0100-C	1017-PF-GH-AMENGA-ETEGO	Ghana	Upper East	7.96678	-1.21071	10.7777	-0.820531	2009	AF-W	S43I	PF0100-C	M74I/N75E/K76T/A220S/Q271E/R371I
2978	PF0028-C	1017-PF-GH-AMENGA-ETEGO	Ghana	Upper East	7.96678	-1.21071	10.7777	-0.820531	2009	AF-W	S43I	PF0028-C
1219	SPT20032	1168-PF-GH-AMENGA-ETEGO-SM	Ghana	Upper East	7.96678	-1.21071	10.7777	-0.820531	2017	AF-W	S43I	SPT20032
3802	SPT36642	1241-PF-GH-ANINAGYEI	Ghana	Greater Accra	7.96678	-1.21071	5.82175	0.0658734	2018	AF-W	S43I	SPT36642
3995	SPT40798	1168-PF-GH-AMENGA-ETEGO-SM	Ghana	Upper East	7.96678	-1.21071	10.7777	-0.820531	2018	AF-W	S43I	SPT40798
8948	SPT41142	1168-PF-GH-AMENGA-ETEGO-SM	Ghana	Upper East	7.96678	-1.21071	10.7777	-0.820531	2018	AF-W	S43I	SPT41142
10037	SPT41188	1168-PF-GH-AMENGA-ETEGO-SM	Ghana	Upper East	7.96678	-1.21071	10.7777	-0.820531	2018	AF-W	S43I	SPT41188
11337	SPT43969	1168-PF-GH-AMENGA-ETEGO-SM	Ghana	Upper East	7.96678	-1.21071	10.7777	-0.820531	2018	AF-W	S43I	SPT43969
11569	QM0057-C	1102-PF-MG-RANDRIANARIVELOJOSIA	Madagascar	Mahajanga	-19.3756	46.6986	-16.537	46.6847	2013	AF-E	S43I	QM0057-C
11723	PT0083-C	1022-PF-MW-OCHOLLA	Malawi	Chikwawa	-13.2151	34.3005	-16.1644	34.7089	2011	AF-E	S43I	PT0083-C
11749	SPT00035	1164-PF-ML-DJIMDE-SM	Mali	Sikasso	17.3562	-3.52215	11.4325	-6.55896	2015	AF-W	S43I	SPT00035
12303	SPT54496	1234-PF-MZ-MAYOR	Mozambique	Cabo Delgado	-17.2596	35.5514	-12.4586	39.3667	2018	AF-E	S43I	SPT54496
14014	SPT54518	1234-PF-MZ-MAYOR	Mozambique	Cabo Delgado	-17.2596	35.5514	-12.4586	39.3667	2018	AF-E	S43I	SPT54518
14021	SPT54589	1234-PF-MZ-MAYOR	Mozambique	Zambezia	-17.2596	35.5514	-16.6513	36.9832	2018	AF-E	S43I	SPT54589
14043	PE0406-C	1095-PF-TZ-ISHENGOMA	Tanzania	Lindi	-6.26622	34.8257	-9.48066	38.4069	2013	AF-E	S43I	PE0406-C
4193	RCN00146	1148-PF-BD-MAUDE	Bangladesh	Chittagong	23.8368	90.2774	22.7121	91.7303	2015	AS-S-FE	S258L/V445I	RCN00146	M74I/N75E/K76T/A220S/Q271E/I356T/R371I
4371	RCN00915	1148-PF-BD-MAUDE	Bangladesh	Chittagong	23.8368	90.2774	22.7121	91.7303	2015	AS-S-FE	S258L/V445I	RCN00915	M74I/N75E/K76T/A220S/Q271E/I356T/R371I
4449	RCN01066	1148-PF-BD-MAUDE	Bangladesh	Chittagong	23.8368	90.2774	22.7121	91.7303	2015	AS-S-FE	S258L/V445I	RCN01066	M74I/N75E/K76T/A220S/Q271E/I356T/R371I
4454	RCN01072	1148-PF-BD-MAUDE	Bangladesh	Chittagong	23.8368	90.2774	22.7121	91.7303	2015	AS-S-FE	S258L/V445I	RCN01072	M74I/N75E/K76T/A220S/Q271E/I356T/R371I
4455	RCN01074	1148-PF-BD-MAUDE	Bangladesh	Chittagong	23.8368	90.2774	22.7121	91.7303	2015	AS-S-FE	S258L/V445I	RCN01074	M74I/N75E/K76T/A220S/Q271E/I356T/R371I
4482	RCN01127	1148-PF-BD-MAUDE	Bangladesh	Chittagong	23.8368	90.2774	22.7121	91.7303	2015	AS-S-FE	S258L/V445I	RCN01127	M74I/N75E/K76T/A220S/Q271E/I356T/R371I
4664	RCN02288	1148-PF-BD-MAUDE	Bangladesh	Chittagong	23.8368	90.2774	22.7121	91.7303	2016	AS-S-FE	S258L/V445I	RCN02288	M74I/N75E/K76T/A220S/Q271E/N326S/I356T/R371I
4733	RCN02455	1148-PF-BD-MAUDE	Bangladesh	Chittagong	23.8368	90.2774	22.7121	91.7303	2016	AS-S-FE	S258L/V445I	RCN02455	M74I/N75E/K76T/A220S/Q271E/I356T/R371I
4809	RCN02616	1148-PF-BD-MAUDE	Bangladesh	Chittagong	23.8368	90.2774	22.7121	91.7303	2016	AS-S-FE	S258L/V445I	RCN02616	M74I/N75E/K76T/A220S/Q271E/I356T/R371I
4815	RCN02628	1148-PF-BD-MAUDE	Bangladesh	Chittagong	23.8368	90.2774	22.7121	91.7303	2016	AS-S-FE	S258L/V445I	RCN02628	M74I/N75E/K76T/A220S/Q271E/I356T/R371I
4929	RCN02854	1148-PF-BD-MAUDE	Bangladesh	Chittagong	23.8368	90.2774	22.7121	91.7303	2016	AS-S-FE	S258L/V445I	RCN02854	M74I/N75E/K76T/A220S/Q271E/I356T/R371I
5044	RCN03082	1148-PF-BD-MAUDE	Bangladesh	Chittagong	23.8368	90.2774	22.7121	91.7303	2016	AS-S-FE	S258L/V445I	RCN03082	M74I/N75E/K76T/A220S/Q271E/I356T/R371I
5054	RCN03100	1148-PF-BD-MAUDE	Bangladesh	Chittagong	23.8368	90.2774	22.7121	91.7303	2016	AS-S-FE	S258L/V445I	RCN03100	M74I/N75E/K76T/A220S/Q271E/I356T/R371I
5055	RCN03101	1148-PF-BD-MAUDE	Bangladesh	Chittagong	23.8368	90.2774	22.7121	91.7303	2016	AS-S-FE	S258L/V445I	RCN03101	M74I/N75E/K76T/A220S/Q271E/I356T/R371I
2801	PN0031-C	1021-PF-PG-MUELLER	Papua New Guinea	Madang	-6.47684	145.254	-5.1608	145.288	2008	OC-NG	S258L/T440A	PN0031-C	C72S/K76T/A220S/N326D/T333A/I356L
2814	PN0078-C	1021-PF-PG-MUELLER	Papua New Guinea	Madang	-6.47684	145.254	-5.1608	145.288	2009	OC-NG	S258L/T440A	PN0078-C	C72S/K76T/A220S/N326D/T333A/I356L
2815	PN0079-C	1021-PF-PG-MUELLER	Papua New Guinea	Madang	-6.47684	145.254	-5.1608	145.288	2009	OC-NG	S258L/T440A	PN0079-C	C72S/K76T/A220S/N326D/T333A/I356L
2853	PN0150-C	1062-PF-PG-BARRY	Papua New Guinea	East Sepik	-6.47684	145.254	-4.31183	143.172	2012	OC-NG	S258L/T440A	PN0150-C	C72S/K76T/A220S/N326D/T333A/I356L
2827	PN0103-C	1062-PF-PG-BARRY	Papua New Guinea	Milne Bay	-6.47684	145.254	-9.95922	150.846	2013	OC-NG	S258L/T440A	PN0103-C	C72S/K76T/A220S/N326D/T333A/I356L
2830	PN0108-C	1062-PF-PG-BARRY	Papua New Guinea	Milne Bay	-6.47684	145.254	-9.95922	150.846	2013	OC-NG	S258L/T440A	PN0108-C	C72S/K76T/A220S/N326D/T333S/I356L
2833	PN0113-C	1062-PF-PG-BARRY	Papua New Guinea	Milne Bay	-6.47684	145.254	-9.95922	150.846	2013	OC-NG	S258L/T440A	PN0113-C	C72S/K76T/A220S/N326D/T333A/I356L
2837	PN0120-C	1062-PF-PG-BARRY	Papua New Guinea	Milne Bay	-6.47684	145.254	-9.95922	150.846	2013	OC-NG	S258L/T440A	PN0120-C	C72S/K76T/A220S/N326D/T333A/I356L
2869	PN0173-C	1062-PF-PG-BARRY	Papua New Guinea	Milne Bay	-6.47684	145.254	-9.95922	150.846	2013	OC-NG	S258L/T440A	PN0173-C	C72S/K76T/A220S/N326D/T333A/I356L
10577	SPT34324	1233-PF-PG-MITA	Papua New Guinea	East Sepik	-6.47684	145.254	-4.31183	143.172	2017	OC-NG	S258L/T440A	SPT34324	C72S/K76T/A220S/N326D/T333A/I356L
10526	SPT34236	1233-PF-PG-MITA	Papua New Guinea	East Sepik	-6.47684	145.254	-4.31183	143.172	2017	OC-NG	S258L/T440A	SPT34236
10552	SPT34266	1233-PF-PG-MITA	Papua New Guinea	East Sepik	-6.47684	145.254	-4.31183	143.172	2017	OC-NG	S258L/T440A	SPT34266
9380	SPT15647	1167-PF-TZ-ISHENGOMA-SM	Tanzania	Kigoma	-6.26622	34.8257	-4.76434	30.4028	2014	AF-E	S258L/T273N	SPT15647
3637	QG0094-C	1101-PF-CD-ONYAMBOKO	Democratic Republic of the Congo	Kinshasa	-2.88119	23.6608	-4.43671	15.9042	2012	AF-C	S258L/S426N	QG0094-C	M74I/N75E/K76T/A220S/Q271E/R371I
14610	SPT72240	1291-PF-CD-FANELLO	Democratic Republic of the Congo	Kinshasa	-2.88119	23.6608	-4.43671	15.9042	2022	AF-C	S258L/S426N	SPT72240
13315	SPT50739	1132-PF-K1000G-DBS-KE-BEJON	Kenya	Kilifi	0.552741	37.8457	-3.1744	39.6869	2013	AF-E	S258L/Q454K	SPT50739
3059	PT0230-C	1022-PF-MW-OCHOLLA	Malawi	Chikwawa	-13.2151	34.3005	-16.1644	34.7089	2011	AF-E	S258L/L534V	PT0230-C
14519	SPT67792	1200-PF-GH-MAIGA-SM	Ghana	Ashanti	7.96678	-1.21071	6.80362	-1.44857	2019	AF-W	S258L/L488F	SPT67792
15205	SPT88722	1291-PF-CD-FANELLO	Democratic Republic of the Congo	Kinshasa	-2.88119	23.6608	-4.43671	15.9042	2022	AF-C	S258L/L431I	SPT88722
4262	RCN00277	1148-PF-BD-MAUDE	Bangladesh	Chittagong	23.8368	90.2774	22.7121	91.7303	2015	AS-S-FE	S258L/K541N	RCN00277	M74I/N75E/K76T/A220S/Q271E/I356T/R371I
4803	RCN02608	1148-PF-BD-MAUDE	Bangladesh	Chittagong	23.8368	90.2774	22.7121	91.7303	2016	AS-S-FE	S258L/K541N	RCN02608	M74I/N75E/K76T/A220S/Q271E/I356T/R371I
4804	RCN02609	1148-PF-BD-MAUDE	Bangladesh	Chittagong	23.8368	90.2774	22.7121	91.7303	2016	AS-S-FE	S258L/K541N	RCN02609	M74I/N75E/K76T/A220S/Q271E/I356T/R371I
941	PR0141-C	1052-PF-TRAC-WHITE	Bangladesh	Chittagong	23.8368	90.2774	22.7121	91.7303	2012	AS-S-FE	S258L/G308E	PR0141-C	M74I/N75E/K76T/A220S/Q271E/N326S/I356T/R371I
965	RCN00720	1148-PF-BD-MAUDE	Bangladesh	Chittagong	23.8368	90.2774	22.7121	91.7303	2015	AS-S-FE	S258L/G308E	RCN00720	M74I/N75E/K76T/A220S/Q271E/I356T/R371I
1021	RCN00804	1148-PF-BD-MAUDE	Bangladesh	Chittagong	23.8368	90.2774	22.7121	91.7303	2015	AS-S-FE	S258L/G308E	RCN00804	M74I/N75E/K76T/A220S/Q271E/I356T/R371I
978	RCN00883	1148-PF-BD-MAUDE	Bangladesh	Chittagong	23.8368	90.2774	22.7121	91.7303	2015	AS-S-FE	S258L/G308E	RCN00883	M74I/N75E/K76T/A220S/Q271E/I356T/R371I
985	RCN02485	1148-PF-BD-MAUDE	Bangladesh	Chittagong	23.8368	90.2774	22.7121	91.7303	2016	AS-S-FE	S258L/G308E	RCN02485	M74I/N75E/K76T/A220S/Q271E/I356T/R371I
692	RCN02723	1148-PF-BD-MAUDE	Bangladesh	Chittagong	23.8368	90.2774	22.7121	91.7303	2016	AS-S-FE	S258L/G308E	RCN02723	M74I/N75E/K76T/A220S/Q271E/I356T/R371I
2800	RCN02724	1148-PF-BD-MAUDE	Bangladesh	Chittagong	23.8368	90.2774	22.7121	91.7303	2016	AS-S-FE	S258L/G308E	RCN02724	M74I/N75E/K76T/A220S/Q271E/I356T/R371I
2929	RCN02735	1148-PF-BD-MAUDE	Bangladesh	Chittagong	23.8368	90.2774	22.7121	91.7303	2016	AS-S-FE	S258L/G308E	RCN02735	M74I/N75E/K76T/A220S/Q271E/I356T/R371I
3330	RCN02737	1148-PF-BD-MAUDE	Bangladesh	Chittagong	23.8368	90.2774	22.7121	91.7303	2016	AS-S-FE	S258L/G308E	RCN02737	M74I/N75E/K76T/A220S/Q271E/I356T/R371I
3334	RCN02738	1148-PF-BD-MAUDE	Bangladesh	Chittagong	23.8368	90.2774	22.7121	91.7303	2016	AS-S-FE	S258L/G308E	RCN02738	M74I/N75E/K76T/A220S/Q271E/I356T/R371I
3340	RCN02783	1148-PF-BD-MAUDE	Bangladesh	Chittagong	23.8368	90.2774	22.7121	91.7303	2016	AS-S-FE	S258L/G308E	RCN02783	M74I/N75E/K76T/A220S/Q271E/I356T/R371I
3341	RCN02784	1148-PF-BD-MAUDE	Bangladesh	Chittagong	23.8368	90.2774	22.7121	91.7303	2016	AS-S-FE	S258L/G308E	RCN02784	M74I/N75E/K76T/A220S/Q271E/I356T/R371I
3655	QG0120-C	1101-PF-CD-ONYAMBOKO	Democratic Republic of the Congo	Kinshasa	-2.88119	23.6608	-4.43671	15.9042	2012	AF-C	S258L/G308E	QG0120-C	M74I/N75E/K76T/A220S/Q271E/R371I
903	QG0209-C	1052-PF-TRAC-WHITE	Democratic Republic of the Congo	Kinshasa	-2.88119	23.6608	-4.43671	15.9042	2013	AF-C	S258L/G308E	QG0209-C	M74I/N75E/K76T/A220S/Q271E/R371I
3427	QG0153-C	1101-PF-CD-ONYAMBOKO	Democratic Republic of the Congo	Kinshasa	-2.88119	23.6608	-4.43671	15.9042	2012	AF-C	S258L/G308E	QG0153-C
3698	SPT88390	1291-PF-CD-FANELLO	Democratic Republic of the Congo	Kinshasa	-2.88119	23.6608	-4.43671	15.9042	2022	AF-C	S258L/G308E	SPT88390
4282	SPT83344	1268-PF-MULTI-PAMGEN-SM	Gambia	Upper River	13.4515	-15.3729	13.3938	-14.1603	2018	AF-W	S258L/G308E	SPT83344	M74I/N75E/K76T/A220S/Q271E/I356T/R371I
4316	PF0942-C	1094-PF-GH-AMENGA-ETEGO	Ghana	Upper East	7.96678	-1.21071	10.7777	-0.820531	2013	AF-W	S258L/G308E	PF0942-C
4356	SPT18317	1168-PF-GH-AMENGA-ETEGO-SM	Ghana	Upper East	7.96678	-1.21071	10.7777	-0.820531	2014	AF-W	S258L/G308E	SPT18317
4740	SPT34358	1168-PF-GH-AMENGA-ETEGO-SM	Ghana	Upper East	7.96678	-1.21071	10.7777	-0.820531	2017	AF-W	S258L/G308E	SPT34358
4857	SPT43158	1132-PF-K1000G-DBS-KE-BEJON	Kenya	Kilifi	0.552741	37.8457	-3.1744	39.6869	2010	AF-E	S258L/G308E	SPT43158
4858	SPT26455	1134-PF-ML-CONWAY	Mali	Kayes	17.3562	-3.52215	13.8729	-10.2304	2016	AF-W	S258L/G308E	SPT26455	A220S/Q271E
4867	SPT52435	1234-PF-MZ-MAYOR	Mozambique	Cabo Delgado	-17.2596	35.5514	-12.4586	39.3667	2017	AF-E	S258L/G308E	SPT52435
4869	QC0187-C	1052-PF-TRAC-WHITE	Myanmar	Bago	21.1171	96.5102	18.2982	96.1308	2012	AS-SE-W	S258L/G308E	QC0187-C	M74I/N75E/K76T/A220S/Q271E/N326S/I356T/R371I
4870	QC0194-C	1052-PF-TRAC-WHITE	Myanmar	Bago	21.1171	96.5102	18.2982	96.1308	2012	AS-SE-W	S258L/G308E	QC0194-C	M74I/N75E/K76T/A220S/Q271E/N326S/I356T/R371I
4892	QC0201-C	1052-PF-TRAC-WHITE	Myanmar	Bago	21.1171	96.5102	18.2982	96.1308	2012	AS-SE-W	S258L/G308E	QC0201-C	M74I/N75E/K76T/A220S/Q271E/N326S/I356T/R371I
4893	QC0204-C	1052-PF-TRAC-WHITE	Myanmar	Bago	21.1171	96.5102	18.2982	96.1308	2012	AS-SE-W	S258L/G308E	QC0204-C	M74I/N75E/K76T/A220S/Q271E/N326S/I356T/R371I
5117	QC0336-C	1052-PF-TRAC-WHITE	Myanmar	Mandalay	21.1171	96.5102	21.2092	96.0035	2013	AS-SE-W	S258L/G308E	QC0336-C	M74I/N75E/K76T/A220S/Q271E/N326S/I356T/R371I
5124	RCN03306	1198-PF-METF-NOSTEN	Myanmar	Kayin	21.1171	96.5102	17.1413	97.7973	2016	AS-SE-W	S258L/G308E	RCN03306	M74I/N75E/K76T/A220S/Q271E/N326S/I356T/R371I
5147	RCN03317	1198-PF-METF-NOSTEN	Myanmar	Kayin	21.1171	96.5102	17.1413	97.7973	2016	AS-SE-W	S258L/G308E	RCN03317	M74I/N75E/K76T/A220S/Q271E/N326S/I356T/R371I
5151	RCN03367	1198-PF-METF-NOSTEN	Myanmar	Kayin	21.1171	96.5102	17.1413	97.7973	2016	AS-SE-W	S258L/G308E	RCN03367	M74I/N75E/K76T/A220S/Q271E/N326S/I356T/R371I
5165	RCN03376	1198-PF-METF-NOSTEN	Myanmar	Kayin	21.1171	96.5102	17.1413	97.7973	2016	AS-SE-W	S258L/G308E	RCN03376	M74I/N75E/K76T/A220S/Q271E/N326S/I356T/R371I
5171	RCN03401	1198-PF-METF-NOSTEN	Myanmar	Kayin	21.1171	96.5102	17.1413	97.7973	2016	AS-SE-W	S258L/G308E	RCN03401	M74I/N75E/K76T/A220S/Q271E/N326S/I356T/R371I
5177	RCN03409	1198-PF-METF-NOSTEN	Myanmar	Kayin	21.1171	96.5102	17.1413	97.7973	2016	AS-SE-W	S258L/G308E	RCN03409	M74I/N75E/K76T/A220S/Q271E/N326S/I356T/R371I
5179	RCN03423	1198-PF-METF-NOSTEN	Myanmar	Kayin	21.1171	96.5102	17.1413	97.7973	2016	AS-SE-W	S258L/G308E	RCN03423	M74I/N75E/K76T/A220S/Q271E/N326S/I356T/R371I
5180	RCN03425	1198-PF-METF-NOSTEN	Myanmar	Kayin	21.1171	96.5102	17.1413	97.7973	2016	AS-SE-W	S258L/G308E	RCN03425	M74I/N75E/K76T/A220S/Q271E/N326S/I356T/R371I
5181	RCN03426	1198-PF-METF-NOSTEN	Myanmar	Kayin	21.1171	96.5102	17.1413	97.7973	2016	AS-SE-W	S258L/G308E	RCN03426	M74I/N75E/K76T/A220S/Q271E/N326S/I356T/R371I
5190	RCN03428	1198-PF-METF-NOSTEN	Myanmar	Kayin	21.1171	96.5102	17.1413	97.7973	2016	AS-SE-W	S258L/G308E	RCN03428	M74I/N75E/K76T/A220S/Q271E/N326S/I356T/R371I
5210	RCN03442	1198-PF-METF-NOSTEN	Myanmar	Kayin	21.1171	96.5102	17.1413	97.7973	2016	AS-SE-W	S258L/G308E	RCN03442	M74I/N75E/K76T/A220S/Q271E/N326S/I356T/R371I
5217	RCN03474	1198-PF-METF-NOSTEN	Myanmar	Kayin	21.1171	96.5102	17.1413	97.7973	2016	AS-SE-W	S258L/G308E	RCN03474	M74I/N75E/K76T/A220S/Q271E/N326S/I356T/R371I
5218	RCN03484	1198-PF-METF-NOSTEN	Myanmar	Kayin	21.1171	96.5102	17.1413	97.7973	2016	AS-SE-W	S258L/G308E	RCN03484	M74I/N75E/K76T/A220S/Q271E/N326S/I356T/R371I
5227	RCN03485	1198-PF-METF-NOSTEN	Myanmar	Kayin	21.1171	96.5102	17.1413	97.7973	2016	AS-SE-W	S258L/G308E	RCN03485	M74I/N75E/K76T/A220S/Q271E/N326S/I356T/R371I
5230	RCN03496	1198-PF-METF-NOSTEN	Myanmar	Kayin	21.1171	96.5102	17.1413	97.7973	2016	AS-SE-W	S258L/G308E	RCN03496	M74I/N75E/K76T/A220S/Q271E/N326S/I356T/R371I
5235	RCN03504	1198-PF-METF-NOSTEN	Myanmar	Kayin	21.1171	96.5102	17.1413	97.7973	2016	AS-SE-W	S258L/G308E	RCN03504	M74I/N75E/K76T/A220S/Q271E/N326S/I356T/R371I
5239	RCN03511	1198-PF-METF-NOSTEN	Myanmar	Kayin	21.1171	96.5102	17.1413	97.7973	2016	AS-SE-W	S258L/G308E	RCN03511	M74I/N75E/K76T/A220S/Q271E/N326S/I356T/R371I
5248	RCN03515	1198-PF-METF-NOSTEN	Myanmar	Kayin	21.1171	96.5102	17.1413	97.7973	2016	AS-SE-W	S258L/G308E	RCN03515	M74I/N75E/K76T/A220S/Q271E/N326S/I356T/R371I
5812	RCN03529	1198-PF-METF-NOSTEN	Myanmar	Kayin	21.1171	96.5102	17.1413	97.7973	2016	AS-SE-W	S258L/G308E	RCN03529	M74I/N75E/K76T/A220S/Q271E/N326S/I356T/R371I
5830	RCN09493	1198-PF-METF-NOSTEN	Myanmar	Kayin	21.1171	96.5102	17.1413	97.7973	2016	AS-SE-W	S258L/G308E	RCN09493	M74I/N75E/K76T/A220S/Q271E/N326S/I356T/R371I
5840	RCN09527	1198-PF-METF-NOSTEN	Myanmar	Kayin	21.1171	96.5102	17.1413	97.7973	2016	AS-SE-W	S258L/G308E	RCN09527	M74I/N75E/K76T/A220S/Q271E/N326S/I356T/R371I
5867	RCN09542	1198-PF-METF-NOSTEN	Myanmar	Kayin	21.1171	96.5102	17.1413	97.7973	2016	AS-SE-W	S258L/G308E	RCN09542	M74I/N75E/K76T/A220S/Q271E/N326S/I356T/R371I
5869	RCN09587	1198-PF-METF-NOSTEN	Myanmar	Kayin	21.1171	96.5102	17.1413	97.7973	2016	AS-SE-W	S258L/G308E	RCN09587	M74I/N75E/K76T/A220S/Q271E/N326S/I356T/R371I
5870	RCN09589	1198-PF-METF-NOSTEN	Myanmar	Kayin	21.1171	96.5102	17.1413	97.7973	2016	AS-SE-W	S258L/G308E	RCN09589	M74I/N75E/K76T/A220S/Q271E/N326S/I356T/R371I
5879	RCN09590	1198-PF-METF-NOSTEN	Myanmar	Kayin	21.1171	96.5102	17.1413	97.7973	2016	AS-SE-W	S258L/G308E	RCN09590	M74I/N75E/K76T/A220S/Q271E/N326S/I356T/R371I
5886	RCN09611	1198-PF-METF-NOSTEN	Myanmar	Kayin	21.1171	96.5102	17.1413	97.7973	2016	AS-SE-W	S258L/G308E	RCN09611	M74I/N75E/K76T/A220S/Q271E/N326S/I356T/R371I
5890	RCN09619	1198-PF-METF-NOSTEN	Myanmar	Kayin	21.1171	96.5102	17.1413	97.7973	2016	AS-SE-W	S258L/G308E	RCN09619	M74I/N75E/K76T/A220S/Q271E/N326S/I356T/R371I
5896	RCN09625	1198-PF-METF-NOSTEN	Myanmar	Kayin	21.1171	96.5102	17.1413	97.7973	2016	AS-SE-W	S258L/G308E	RCN09625	M74I/N75E/K76T/A220S/Q271E/N326S/I356T/R371I
5931	RCN09636	1198-PF-METF-NOSTEN	Myanmar	Kayin	21.1171	96.5102	17.1413	97.7973	2016	AS-SE-W	S258L/G308E	RCN09636	M74I/N75E/K76T/A220S/Q271E/N326S/I356T/R371I
6031	RCN09690	1198-PF-METF-NOSTEN	Myanmar	Kayin	21.1171	96.5102	17.1413	97.7973	2016	AS-SE-W	S258L/G308E	RCN09690	M74I/N75E/K76T/A220S/Q271E/N326S/I356T/R371I
6033	RCN09863	1198-PF-METF-NOSTEN	Myanmar	Kayin	21.1171	96.5102	17.1413	97.7973	2016	AS-SE-W	S258L/G308E	RCN09863	M74I/N75E/K76T/A220S/Q271E/N326S/I356T/R371I
6116	RCN09865	1198-PF-METF-NOSTEN	Myanmar	Kayin	21.1171	96.5102	17.1413	97.7973	2016	AS-SE-W	S258L/G308E	RCN09865	M74I/N75E/K76T/A220S/Q271E/N326S/I356T/R371I
5735	RCN10006	1198-PF-METF-NOSTEN	Myanmar	Kayin	21.1171	96.5102	17.1413	97.7973	2016	AS-SE-W	S258L/G308E	RCN10006	M74I/N75E/K76T/A220S/Q271E/N326S/I356T/R371I
5740	RCN09334	1198-PF-METF-NOSTEN	Myanmar	Kayin	21.1171	96.5102	17.1413	97.7973	2017	AS-SE-W	S258L/G308E	RCN09334	M74I/N75E/K76T/A220S/Q271E/N326S/I356T/R371I
5846	RCN09341	1198-PF-METF-NOSTEN	Myanmar	Kayin	21.1171	96.5102	17.1413	97.7973	2017	AS-SE-W	S258L/G308E	RCN09341	M74I/N75E/K76T/A220S/Q271E/N326S/I356T/R371I
5853	RCN09554	1198-PF-METF-NOSTEN	Myanmar	Kayin	21.1171	96.5102	17.1413	97.7973	2017	AS-SE-W	S258L/G308E	RCN09554	M74I/N75E/K76T/A220S/Q271E/N326S/I356T/R371I
5857	RCN09567	1198-PF-METF-NOSTEN	Myanmar	Kayin	21.1171	96.5102	17.1413	97.7973	2017	AS-SE-W	S258L/G308E	RCN09567	M74I/N75E/K76T/A220S/Q271E/N326S/I356T/R371I
5860	RCN09572	1198-PF-METF-NOSTEN	Myanmar	Kayin	21.1171	96.5102	17.1413	97.7973	2017	AS-SE-W	S258L/G308E	RCN09572	M74I/N75E/K76T/A220S/Q271E/N326S/I356T/R371I
5863	RCN09577	1198-PF-METF-NOSTEN	Myanmar	Kayin	21.1171	96.5102	17.1413	97.7973	2017	AS-SE-W	S258L/G308E	RCN09577	M74I/N75E/K76T/A220S/Q271E/N326S/I356T/R371I
5864	RCN09582	1198-PF-METF-NOSTEN	Myanmar	Kayin	21.1171	96.5102	17.1413	97.7973	2017	AS-SE-W	S258L/G308E	RCN09582	M74I/N75E/K76T/A220S/Q271E/N326S/I356T/R371I
5866	RCN09584	1198-PF-METF-NOSTEN	Myanmar	Kayin	21.1171	96.5102	17.1413	97.7973	2017	AS-SE-W	S258L/G308E	RCN09584	M74I/N75E/K76T/A220S/Q271E/N326S/I356T/R371I
5909	RCN09586	1198-PF-METF-NOSTEN	Myanmar	Kayin	21.1171	96.5102	17.1413	97.7973	2017	AS-SE-W	S258L/G308E	RCN09586	M74I/N75E/K76T/A220S/Q271E/N326S/I356T/R371I
5920	RCN09656	1198-PF-METF-NOSTEN	Myanmar	Kayin	21.1171	96.5102	17.1413	97.7973	2017	AS-SE-W	S258L/G308E	RCN09656	M74I/N75E/K76T/A220S/Q271E/N326S/I356T/R371I
5923	RCN09673	1198-PF-METF-NOSTEN	Myanmar	Kayin	21.1171	96.5102	17.1413	97.7973	2017	AS-SE-W	S258L/G308E	RCN09673	M74I/N75E/K76T/A220S/Q271E/N326S/I356T/R371I
5928	RCN09680	1198-PF-METF-NOSTEN	Myanmar	Kayin	21.1171	96.5102	17.1413	97.7973	2017	AS-SE-W	S258L/G308E	RCN09680	M74I/N75E/K76T/A220S/Q271E/N326S/I356T/R371I
5943	RCN09687	1198-PF-METF-NOSTEN	Myanmar	Kayin	21.1171	96.5102	17.1413	97.7973	2017	AS-SE-W	S258L/G308E	RCN09687	M74I/N75E/K76T/A220S/Q271E/N326S/I356T/R371I
5952	RCN09709	1198-PF-METF-NOSTEN	Myanmar	Kayin	21.1171	96.5102	17.1413	97.7973	2017	AS-SE-W	S258L/G308E	RCN09709	M74I/N75E/K76T/A220S/Q271E/N326S/I356T/R371I
5960	RCN09719	1198-PF-METF-NOSTEN	Myanmar	Kayin	21.1171	96.5102	17.1413	97.7973	2017	AS-SE-W	S258L/G308E	RCN09719	M74I/N75E/K76T/A220S/Q271E/N326S/I356T/R371I
5962	RCN09729	1198-PF-METF-NOSTEN	Myanmar	Kayin	21.1171	96.5102	17.1413	97.7973	2017	AS-SE-W	S258L/G308E	RCN09729	M74I/N75E/K76T/A220S/Q271E/N326S/I356T/R371I
5963	RCN09735	1198-PF-METF-NOSTEN	Myanmar	Kayin	21.1171	96.5102	17.1413	97.7973	2017	AS-SE-W	S258L/G308E	RCN09735	M74I/N75E/K76T/A220S/Q271E/N326S/I356T/R371I
5967	RCN09736	1198-PF-METF-NOSTEN	Myanmar	Kayin	21.1171	96.5102	17.1413	97.7973	2017	AS-SE-W	S258L/G308E	RCN09736	M74I/N75E/K76T/A220S/Q271E/N326S/I356T/R371I
5972	RCN09744	1198-PF-METF-NOSTEN	Myanmar	Kayin	21.1171	96.5102	17.1413	97.7973	2017	AS-SE-W	S258L/G308E	RCN09744	M74I/N75E/K76T/A220S/Q271E/N326S/I356T/R371I
5974	RCN09751	1198-PF-METF-NOSTEN	Myanmar	Kayin	21.1171	96.5102	17.1413	97.7973	2017	AS-SE-W	S258L/G308E	RCN09751	M74I/N75E/K76T/A220S/Q271E/N326S/I356T/R371I
5975	RCN09756	1198-PF-METF-NOSTEN	Myanmar	Kayin	21.1171	96.5102	17.1413	97.7973	2017	AS-SE-W	S258L/G308E	RCN09756	M74I/N75E/K76T/A220S/Q271E/N326S/I356T/R371I
5981	RCN09757	1198-PF-METF-NOSTEN	Myanmar	Kayin	21.1171	96.5102	17.1413	97.7973	2017	AS-SE-W	S258L/G308E	RCN09757	M74I/N75E/K76T/A220S/Q271E/N326S/I356T/R371I
5984	RCN09765	1198-PF-METF-NOSTEN	Myanmar	Kayin	21.1171	96.5102	17.1413	97.7973	2017	AS-SE-W	S258L/G308E	RCN09765	M74I/N75E/K76T/A220S/Q271E/N326S/I356T/R371I
5987	RCN09774	1198-PF-METF-NOSTEN	Myanmar	Kayin	21.1171	96.5102	17.1413	97.7973	2017	AS-SE-W	S258L/G308E	RCN09774	M74I/N75E/K76T/A220S/Q271E/N326S/I356T/R371I
5990	RCN09780	1198-PF-METF-NOSTEN	Myanmar	Kayin	21.1171	96.5102	17.1413	97.7973	2017	AS-SE-W	S258L/G308E	RCN09780	M74I/N75E/K76T/A220S/Q271E/N326S/I356T/R371I
5991	RCN09785	1198-PF-METF-NOSTEN	Myanmar	Kayin	21.1171	96.5102	17.1413	97.7973	2017	AS-SE-W	S258L/G308E	RCN09785	M74I/N75E/K76T/A220S/Q271E/N326S/I356T/R371I
6001	RCN09786	1198-PF-METF-NOSTEN	Myanmar	Kayin	21.1171	96.5102	17.1413	97.7973	2017	AS-SE-W	S258L/G308E	RCN09786	M74I/N75E/K76T/A220S/Q271E/N326S/I356T/R371I
6003	RCN09805	1198-PF-METF-NOSTEN	Myanmar	Kayin	21.1171	96.5102	17.1413	97.7973	2017	AS-SE-W	S258L/G308E	RCN09805	M74I/N75E/K76T/A220S/Q271E/N326S/I356T/R371I
6007	RCN09811	1198-PF-METF-NOSTEN	Myanmar	Kayin	21.1171	96.5102	17.1413	97.7973	2017	AS-SE-W	S258L/G308E	RCN09811	M74I/N75E/K76T/A220S/Q271E/N326S/I356T/R371I
6017	RCN09818	1198-PF-METF-NOSTEN	Myanmar	Kayin	21.1171	96.5102	17.1413	97.7973	2017	AS-SE-W	S258L/G308E	RCN09818	M74I/N75E/K76T/A220S/Q271E/N326S/I356T/R371I
6020	RCN09835	1198-PF-METF-NOSTEN	Myanmar	Kayin	21.1171	96.5102	17.1413	97.7973	2017	AS-SE-W	S258L/G308E	RCN09835	M74I/N75E/K76T/A220S/Q271E/N326S/I356T/R371I
6021	RCN09839	1198-PF-METF-NOSTEN	Myanmar	Kayin	21.1171	96.5102	17.1413	97.7973	2017	AS-SE-W	S258L/G308E	RCN09839	M74I/N75E/K76T/A220S/Q271E/N326S/I356T/R371I
6023	RCN09842	1198-PF-METF-NOSTEN	Myanmar	Kayin	21.1171	96.5102	17.1413	97.7973	2017	AS-SE-W	S258L/G308E	RCN09842	M74I/N75E/K76T/A220S/Q271E/N326S/I356T/R371I
6025	RCN09850	1198-PF-METF-NOSTEN	Myanmar	Kayin	21.1171	96.5102	17.1413	97.7973	2017	AS-SE-W	S258L/G308E	RCN09850	M74I/N75E/K76T/A220S/Q271E/N326S/I356T/R371I
6028	RCN09852	1198-PF-METF-NOSTEN	Myanmar	Kayin	21.1171	96.5102	17.1413	97.7973	2017	AS-SE-W	S258L/G308E	RCN09852	M74I/N75E/K76T/A220S/Q271E/N326S/I356T/R371I
6029	RCN09855	1198-PF-METF-NOSTEN	Myanmar	Kayin	21.1171	96.5102	17.1413	97.7973	2017	AS-SE-W	S258L/G308E	RCN09855	M74I/N75E/K76T/A220S/Q271E/N326S/I356T/R371I
6036	RCN09856	1198-PF-METF-NOSTEN	Myanmar	Kayin	21.1171	96.5102	17.1413	97.7973	2017	AS-SE-W	S258L/G308E	RCN09856	M74I/N75E/K76T/A220S/Q271E/N326S/I356T/R371I
6038	RCN09878	1198-PF-METF-NOSTEN	Myanmar	Kayin	21.1171	96.5102	17.1413	97.7973	2017	AS-SE-W	S258L/G308E	RCN09878	M74I/N75E/K76T/A220S/Q271E/N326S/I356T/R371I
6053	RCN09881	1198-PF-METF-NOSTEN	Myanmar	Kayin	21.1171	96.5102	17.1413	97.7973	2017	AS-SE-W	S258L/G308E	RCN09881	M74I/N75E/K76T/A220S/Q271E/N326S/I356T/R371I
6054	RCN09906	1198-PF-METF-NOSTEN	Myanmar	Kayin	21.1171	96.5102	17.1413	97.7973	2017	AS-SE-W	S258L/G308E	RCN09906	M74I/N75E/K76T/A220S/Q271E/N326S/I356T/R371I
6056	RCN09907	1198-PF-METF-NOSTEN	Myanmar	Kayin	21.1171	96.5102	17.1413	97.7973	2017	AS-SE-W	S258L/G308E	RCN09907	M74I/N75E/K76T/A220S/Q271E/N326S/I356T/R371I
6058	RCN09910	1198-PF-METF-NOSTEN	Myanmar	Kayin	21.1171	96.5102	17.1413	97.7973	2017	AS-SE-W	S258L/G308E	RCN09910	M74I/N75E/K76T/A220S/Q271E/N326S/I356T/R371I
6059	RCN09912	1198-PF-METF-NOSTEN	Myanmar	Kayin	21.1171	96.5102	17.1413	97.7973	2017	AS-SE-W	S258L/G308E	RCN09912	M74I/N75E/K76T/A220S/Q271E/N326S/I356T/R371I
6060	RCN09913	1198-PF-METF-NOSTEN	Myanmar	Kayin	21.1171	96.5102	17.1413	97.7973	2017	AS-SE-W	S258L/G308E	RCN09913	M74I/N75E/K76T/A220S/Q271E/N326S/I356T/R371I
6061	RCN09914	1198-PF-METF-NOSTEN	Myanmar	Kayin	21.1171	96.5102	17.1413	97.7973	2017	AS-SE-W	S258L/G308E	RCN09914	M74I/N75E/K76T/A220S/Q271E/N326S/I356T/R371I
6062	RCN09915	1198-PF-METF-NOSTEN	Myanmar	Kayin	21.1171	96.5102	17.1413	97.7973	2017	AS-SE-W	S258L/G308E	RCN09915	M74I/N75E/K76T/A220S/Q271E/N326S/I356T/R371I
6065	RCN09916	1198-PF-METF-NOSTEN	Myanmar	Kayin	21.1171	96.5102	17.1413	97.7973	2017	AS-SE-W	S258L/G308E	RCN09916	M74I/N75E/K76T/A220S/Q271E/N326S/I356T/R371I
6067	RCN09921	1198-PF-METF-NOSTEN	Myanmar	Kayin	21.1171	96.5102	17.1413	97.7973	2017	AS-SE-W	S258L/G308E	RCN09921	M74I/N75E/K76T/A220S/Q271E/N326S/I356T/R371I
6069	RCN09924	1198-PF-METF-NOSTEN	Myanmar	Kayin	21.1171	96.5102	17.1413	97.7973	2017	AS-SE-W	S258L/G308E	RCN09924	M74I/N75E/K76T/A220S/Q271E/N326S/I356T/R371I
6070	RCN09926	1198-PF-METF-NOSTEN	Myanmar	Kayin	21.1171	96.5102	17.1413	97.7973	2017	AS-SE-W	S258L/G308E	RCN09926	M74I/N75E/K76T/A220S/Q271E/N326S/I356T/R371I
6073	RCN09927	1198-PF-METF-NOSTEN	Myanmar	Kayin	21.1171	96.5102	17.1413	97.7973	2017	AS-SE-W	S258L/G308E	RCN09927	M74I/N75E/K76T/A220S/Q271E/N326S/I356T/R371I
6074	RCN09930	1198-PF-METF-NOSTEN	Myanmar	Kayin	21.1171	96.5102	17.1413	97.7973	2017	AS-SE-W	S258L/G308E	RCN09930	M74I/N75E/K76T/A220S/Q271E/N326S/I356T/R371I
6078	RCN09931	1198-PF-METF-NOSTEN	Myanmar	Kayin	21.1171	96.5102	17.1413	97.7973	2017	AS-SE-W	S258L/G308E	RCN09931	M74I/N75E/K76T/A220S/Q271E/N326S/I356T/R371I
6081	RCN09939	1198-PF-METF-NOSTEN	Myanmar	Kayin	21.1171	96.5102	17.1413	97.7973	2017	AS-SE-W	S258L/G308E	RCN09939	M74I/N75E/K76T/A220S/Q271E/N326S/I356T/R371I
6082	RCN09942	1198-PF-METF-NOSTEN	Myanmar	Kayin	21.1171	96.5102	17.1413	97.7973	2017	AS-SE-W	S258L/G308E	RCN09942	M74I/N75E/K76T/A220S/Q271E/N326S/I356T/R371I
6083	RCN09943	1198-PF-METF-NOSTEN	Myanmar	Kayin	21.1171	96.5102	17.1413	97.7973	2017	AS-SE-W	S258L/G308E	RCN09943	M74I/N75E/K76T/A220S/Q271E/N326S/I356T/R371I
6093	RCN09944	1198-PF-METF-NOSTEN	Myanmar	Kayin	21.1171	96.5102	17.1413	97.7973	2017	AS-SE-W	S258L/G308E	RCN09944	M74I/N75E/K76T/A220S/Q271E/N326S/I356T/R371I
6094	RCN09959	1198-PF-METF-NOSTEN	Myanmar	Kayin	21.1171	96.5102	17.1413	97.7973	2017	AS-SE-W	S258L/G308E	RCN09959	M74I/N75E/K76T/A220S/Q271E/N326S/I356T/R371I
6095	RCN09960	1198-PF-METF-NOSTEN	Myanmar	Kayin	21.1171	96.5102	17.1413	97.7973	2017	AS-SE-W	S258L/G308E	RCN09960	M74I/N75E/K76T/A220S/Q271E/N326S/I356T/R371I
6099	RCN09961	1198-PF-METF-NOSTEN	Myanmar	Kayin	21.1171	96.5102	17.1413	97.7973	2017	AS-SE-W	S258L/G308E	RCN09961	M74I/N75E/K76T/A220S/Q271E/N326S/I356T/R371I
6100	RCN09965	1198-PF-METF-NOSTEN	Myanmar	Kayin	21.1171	96.5102	17.1413	97.7973	2017	AS-SE-W	S258L/G308E	RCN09965	M74I/N75E/K76T/A220S/Q271E/N326S/I356T/R371I
10525	RCN09967	1198-PF-METF-NOSTEN	Myanmar	Kayin	21.1171	96.5102	17.1413	97.7973	2017	AS-SE-W	S258L/G308E	RCN09967	M74I/N75E/K76T/A220S/Q271E/N326S/I356T/R371I
10576	PN0025-C	1021-PF-PG-MUELLER	Papua New Guinea	Madang	-6.47684	145.254	-5.1608	145.288	2008	OC-NG	S258L/G308E	PN0025-C	C72S/K76T/A220S/N326D/T333A/I356L
14834	SPT34235	1233-PF-PG-MITA	Papua New Guinea	East Sepik	-6.47684	145.254	-4.31183	143.172	2017	OC-NG	S258L/G308E	SPT34235	C72S/K76T/A220S/N326D/T333A/I356L
12035	SPT34323	1233-PF-PG-MITA	Papua New Guinea	East Sepik	-6.47684	145.254	-4.31183	143.172	2017	OC-NG	S258L/G308E	SPT34323	C72S/K76T/A220S/N326D/T333A/I356L
3671	PE0098-C	1095-PF-TZ-ISHENGOMA	Tanzania	Tanga	-6.26622	34.8257	-5.218	38.2819	2013	AF-E	S258L/G308E	PE0098-C
1074	SPT15714	1167-PF-TZ-ISHENGOMA-SM	Tanzania	Tanga	-6.26622	34.8257	-5.218	38.2819	2014	AF-E	S258L/G308E	SPT15714
1641	SPT15866	1167-PF-TZ-ISHENGOMA-SM	Tanzania	Tanga	-6.26622	34.8257	-5.218	38.2819	2014	AF-E	S258L/G308E	SPT15866
9420	SPT46289	1263-PF-TZ-BWIRE-SM	Tanzania	Pwani	-6.26622	34.8257	-7.26948	38.6619	2019	AF-E	S258L/G308E	SPT46289
9490	SPT46333	1263-PF-TZ-BWIRE-SM	Tanzania	Pwani	-6.26622	34.8257	-7.26948	38.6619	2019	AF-E	S258L/G308E	SPT46333
9754	SPT46492	1263-PF-TZ-BWIRE-SM	Tanzania	Pwani	-6.26622	34.8257	-7.26948	38.6619	2019	AF-E	S258L/G308E	SPT46492
10405	SPT46536	1263-PF-TZ-BWIRE-SM	Tanzania	Pwani	-6.26622	34.8257	-7.26948	38.6619	2019	AF-E	S258L/G308E	SPT46536
10586	PD1266-C	1125-PF-TH-NOSTEN	Thailand	Tak	15.1104	101.015	16.715	98.7911	2001	AS-SE-W	S258L/G308E	PD1266-C	M74I/N75E/K76T/A220S/Q271E/N326S/I356T/R371I
13627	PD1314-C	1125-PF-TH-NOSTEN	Thailand	Tak	15.1104	101.015	16.715	98.7911	2002	AS-SE-W	S258L/G308E	PD1314-C	M74I/N75E/K76T/A220S/Q271E/N326S/I356T/R371I
12669	PD1443-C	1125-PF-TH-NOSTEN	Thailand	Tak	15.1104	101.015	16.715	98.7911	2002	AS-SE-W	S258L/G308E	PD1443-C	M74I/N75E/K76T/A220S/Q271E/N326S/I356T/R371I
12702	PD1347-C	1125-PF-TH-NOSTEN	Thailand	Tak	15.1104	101.015	16.715	98.7911	2003	AS-SE-W	S258L/G308E	PD1347-C	M74I/N75E/K76T/A220S/Q271E/N326S/I356T/R371I
12813	PD1361-C	1125-PF-TH-NOSTEN	Thailand	Tak	15.1104	101.015	16.715	98.7911	2003	AS-SE-W	S258L/G308E	PD1361-C	M74I/N75E/K76T/A220S/Q271E/N326S/I356T/R371I
12845	PD0862-C	1125-PF-TH-NOSTEN	Thailand	Tak	15.1104	101.015	16.715	98.7911	2008	AS-SE-W	S258L/G308E	PD0862-C	M74I/N75E/K76T/A220S/Q271E/N326S/I356T/R371I
15139	PD1216-C	1125-PF-TH-NOSTEN	Thailand	Tak	15.1104	101.015	16.715	98.7911	2013	AS-SE-W	S258L/G308E	PD1216-C	M74I/N75E/K76T/A220S/Q271E/N326S/I356T/R371I
381	PC0301-C	1107-PF-KEN-KAMAU	Kenya	Kisumu	0.552741	37.8457	-0.163033	34.8344	2014	AF-NE	S258L/F442L	PC0301-C	G32D
10292	SPT24603	1224-PF-VN-ROSANAS-URGELL	Vietnam	Quang Nam	16.6944	106.552	15.5898	107.96	2012	AS-SE-E	S258L/F313S/Q497R	SPT24603	M74I/N75E/K76T/A220S/Q271E/N326S/I356T/R371I
2270	PH1058-C	1044-PF-KH-FAIRHURST	Cambodia	Ratanakiri	12.709	104.917	13.7929	107.087	2012	AS-SE-E	S258L/F313S/Q454E	PH1058-C	M74I/N75D/K76T/A144F/L148I/I194T/A220S/Q271E/T333S
934	PR0001-CW	1031-PF-SEA-PLOWE	Bangladesh	Chittagong	23.8368	90.2774	22.7121	91.7303	2008	AS-S-FE	S258L/F313S	PR0001-CW	M74I/N75E/K76T/A220S/Q271E/R371I
936	PR0042-C	1031-PF-SEA-PLOWE	Bangladesh	Chittagong	23.8368	90.2774	22.7121	91.7303	2009	AS-S-FE	S258L/F313S	PR0042-C	M74I/N75E/K76T/A220S/Q271E/I356T/R371I
937	RCN00135	1148-PF-BD-MAUDE	Bangladesh	Chittagong	23.8368	90.2774	22.7121	91.7303	2015	AS-S-FE	S258L/F313S	RCN00135	M74I/N75E/K76T/A220S/Q271E/I356T/R371I
938	RCN00151	1148-PF-BD-MAUDE	Bangladesh	Chittagong	23.8368	90.2774	22.7121	91.7303	2015	AS-S-FE	S258L/F313S	RCN00151	M74I/N75E/K76T/A220S/Q271E/I356T/R371I
939	RCN00162	1148-PF-BD-MAUDE	Bangladesh	Chittagong	23.8368	90.2774	22.7121	91.7303	2015	AS-S-FE	S258L/F313S	RCN00162	M74I/N75E/K76T/A220S/Q271E/I356T/R371I
940	RCN00835	1148-PF-BD-MAUDE	Bangladesh	Chittagong	23.8368	90.2774	22.7121	91.7303	2015	AS-S-FE	S258L/F313S	RCN00835	M74I/N75E/K76T/A220S/Q271E/N326S/I356T/R371I
943	RCN01061	1148-PF-BD-MAUDE	Bangladesh	Chittagong	23.8368	90.2774	22.7121	91.7303	2015	AS-S-FE	S258L/F313S	RCN01061	M74I/N75E/K76T/A220S/Q271E/I356T/R371I
945	RCN01069	1148-PF-BD-MAUDE	Bangladesh	Chittagong	23.8368	90.2774	22.7121	91.7303	2015	AS-S-FE	S258L/F313S	RCN01069	M74I/N75E/K76T/A220S/Q271E/I356T/R371I
947	RCN01075	1148-PF-BD-MAUDE	Bangladesh	Chittagong	23.8368	90.2774	22.7121	91.7303	2015	AS-S-FE	S258L/F313S	RCN01075	M74I/N75E/K76T/A220S/Q271E/I356T/R371I
948	RCN01130	1148-PF-BD-MAUDE	Bangladesh	Chittagong	23.8368	90.2774	22.7121	91.7303	2015	AS-S-FE	S258L/F313S	RCN01130	M74I/N75E/K76T/A220S/Q271E/I356T/R371I
950	RCN02024	1148-PF-BD-MAUDE	Bangladesh	Chittagong	23.8368	90.2774	22.7121	91.7303	2015	AS-S-FE	S258L/F313S	RCN02024	M74I/N75E/K76T/A220S/Q271E/N326S/I356T/R371I
952	RCN01141	1148-PF-BD-MAUDE	Bangladesh	Chittagong	23.8368	90.2774	22.7121	91.7303	2016	AS-S-FE	S258L/F313S	RCN01141	M74I/N75E/K76T/A220S/Q271E/R371I
955	RCN02109	1148-PF-BD-MAUDE	Bangladesh	Chittagong	23.8368	90.2774	22.7121	91.7303	2016	AS-S-FE	S258L/F313S	RCN02109	M74I/N75E/K76T/A220S/Q271E/I356T/R371I
956	RCN02116	1148-PF-BD-MAUDE	Bangladesh	Chittagong	23.8368	90.2774	22.7121	91.7303	2016	AS-S-FE	S258L/F313S	RCN02116	M74I/N75E/K76T/A220S/Q271E/I356T/R371I
958	RCN02124	1148-PF-BD-MAUDE	Bangladesh	Chittagong	23.8368	90.2774	22.7121	91.7303	2016	AS-S-FE	S258L/F313S	RCN02124	M74I/N75E/K76T/A220S/Q271E/I356T/R371I
959	RCN02133	1148-PF-BD-MAUDE	Bangladesh	Chittagong	23.8368	90.2774	22.7121	91.7303	2016	AS-S-FE	S258L/F313S	RCN02133	M74I/N75E/K76T/A220S/Q271E/I356T/R371I
961	RCN02169	1148-PF-BD-MAUDE	Bangladesh	Chittagong	23.8368	90.2774	22.7121	91.7303	2016	AS-S-FE	S258L/F313S	RCN02169	M74I/N75E/K76T/A220S/Q271E/I356T/R371I
963	RCN02356	1148-PF-BD-MAUDE	Bangladesh	Chittagong	23.8368	90.2774	22.7121	91.7303	2016	AS-S-FE	S258L/F313S	RCN02356	M74I/N75E/K76T/A220S/Q271E/I356T/R371I
967	RCN02361	1148-PF-BD-MAUDE	Bangladesh	Chittagong	23.8368	90.2774	22.7121	91.7303	2016	AS-S-FE	S258L/F313S	RCN02361	M74I/N75E/K76T/A220S/Q271E/R371I
968	RCN02411	1148-PF-BD-MAUDE	Bangladesh	Chittagong	23.8368	90.2774	22.7121	91.7303	2016	AS-S-FE	S258L/F313S	RCN02411	M74I/N75E/K76T/A220S/Q271E/I356T/R371I
971	RCN02606	1148-PF-BD-MAUDE	Bangladesh	Chittagong	23.8368	90.2774	22.7121	91.7303	2016	AS-S-FE	S258L/F313S	RCN02606	M74I/N75E/K76T/A220S/Q271E/I356T/R371I
972	RCN02664	1148-PF-BD-MAUDE	Bangladesh	Chittagong	23.8368	90.2774	22.7121	91.7303	2016	AS-S-FE	S258L/F313S	RCN02664	M74I/N75E/K76T/A220S/Q271E/R371I
973	RCN02743	1148-PF-BD-MAUDE	Bangladesh	Chittagong	23.8368	90.2774	22.7121	91.7303	2016	AS-S-FE	S258L/F313S	RCN02743	M74I/N75E/K76T/A220S/Q271E/I356T/R371I
1022	RCN02766	1148-PF-BD-MAUDE	Bangladesh	Chittagong	23.8368	90.2774	22.7121	91.7303	2016	AS-S-FE	S258L/F313S	RCN02766	M74I/N75E/K76T/A220S/Q271E/I356T/R371I
1023	RCN02789	1148-PF-BD-MAUDE	Bangladesh	Chittagong	23.8368	90.2774	22.7121	91.7303	2016	AS-S-FE	S258L/F313S	RCN02789	M74I/N75E/K76T/A220S/Q271E/I356T/R371I
440	RCN02790	1148-PF-BD-MAUDE	Bangladesh	Chittagong	23.8368	90.2774	22.7121	91.7303	2016	AS-S-FE	S258L/F313S	RCN02790	M74I/N75E/K76T/A220S/Q271E/I356T/R371I
441	RCN02881	1148-PF-BD-MAUDE	Bangladesh	Chittagong	23.8368	90.2774	22.7121	91.7303	2016	AS-S-FE	S258L/F313S	RCN02881	M74I/N75E/K76T/A220S/Q271E/I356T/R371I
442	RCN02944	1148-PF-BD-MAUDE	Bangladesh	Chittagong	23.8368	90.2774	22.7121	91.7303	2016	AS-S-FE	S258L/F313S	RCN02944	M74I/N75E/K76T/A220S/Q271E/I356T/R371I
443	RCN02996	1148-PF-BD-MAUDE	Bangladesh	Chittagong	23.8368	90.2774	22.7121	91.7303	2016	AS-S-FE	S258L/F313S	RCN02996	M74I/N75E/K76T/A220S/Q271E/I356T/R371I
444	RCN03002	1148-PF-BD-MAUDE	Bangladesh	Chittagong	23.8368	90.2774	22.7121	91.7303	2016	AS-S-FE	S258L/F313S	RCN03002	M74I/N75E/K76T/A220S/Q271E/N326S/I356T/R371I
445	RCN03007	1148-PF-BD-MAUDE	Bangladesh	Chittagong	23.8368	90.2774	22.7121	91.7303	2016	AS-S-FE	S258L/F313S	RCN03007	M74I/N75E/K76T/A220S/Q271E/N326S/I356T/R371I
448	RCN03010	1148-PF-BD-MAUDE	Bangladesh	Chittagong	23.8368	90.2774	22.7121	91.7303	2016	AS-S-FE	S258L/F313S	RCN03010	M74I/N75E/K76T/A220S/Q271E/N326S/I356T/R371I
449	RCN03011	1148-PF-BD-MAUDE	Bangladesh	Chittagong	23.8368	90.2774	22.7121	91.7303	2016	AS-S-FE	S258L/F313S	RCN03011	M74I/N75E/K76T/A220S/Q271E/N326S/I356T/R371I
450	RCN03042	1148-PF-BD-MAUDE	Bangladesh	Chittagong	23.8368	90.2774	22.7121	91.7303	2016	AS-S-FE	S258L/F313S	RCN03042	M74I/N75E/K76T/A220S/Q271E/I356T/R371I
465	RCN03122	1148-PF-BD-MAUDE	Bangladesh	Chittagong	23.8368	90.2774	22.7121	91.7303	2016	AS-S-FE	S258L/F313S	RCN03122	M74I/N75E/K76T/A220S/Q271E/N326S/I356T/R371I
467	RCN03123	1148-PF-BD-MAUDE	Bangladesh	Chittagong	23.8368	90.2774	22.7121	91.7303	2016	AS-S-FE	S258L/F313S	RCN03123	M74I/N75E/K76T/A220S/Q271E/N326S/I356T/R371I
494	RCN08193	1195-PF-TRAC2-DONDORP	Bangladesh	Chittagong	23.8368	90.2774	22.7121	91.7303	2016	AS-S-FE	S258L/F313S	RCN08193	M74I/N75E/K76T/A220S/Q271E/I356T/R371I
976	RCN08199	1195-PF-TRAC2-DONDORP	Bangladesh	Chittagong	23.8368	90.2774	22.7121	91.7303	2016	AS-S-FE	S258L/F313S	RCN08199	M74I/N75E/K76T/A220S/Q271E/N326S/I356T/R371I
979	PH0005-C	1011-PF-KH-SU	Cambodia	Pursat	12.709	104.917	12.3652	103.636	2007	AS-SE-E	S258L/F313S	PH0005-C	M74I/N75E/K76T/A220S/Q271E/N326S/I356T/R371I
981	PH0018-C	1011-PF-KH-SU	Cambodia	Pursat	12.709	104.917	12.3652	103.636	2007	AS-SE-E	S258L/F313S	PH0018-C	M74I/N75E/K76T/A220S/Q271E/N326S/I356T/R371I
982	PH0021-C	1012-PF-KH-WHITE	Cambodia	Pailin	12.709	104.917	12.8784	102.633	2007	AS-SE-E	S258L/F313S	PH0021-C	M74I/N75E/K76T/A220S/Q271E/N326S/I356T/R371I
983	PH0022-C	1012-PF-KH-WHITE	Cambodia	Pailin	12.709	104.917	12.8784	102.633	2007	AS-SE-E	S258L/F313S	PH0022-C	M74I/N75E/K76T/A220S/Q271E/N326S/I356T/R371I
984	PH0024-C	1011-PF-KH-SU	Cambodia	Pursat	12.709	104.917	12.3652	103.636	2007	AS-SE-E	S258L/F313S	PH0024-C	M74I/N75D/K76T/A144F/L148I/I194T/A220S/Q271E/T333S
986	PH0027-Cx	1011-PF-KH-SU	Cambodia	Pursat	12.709	104.917	12.3652	103.636	2007	AS-SE-E	S258L/F313S	PH0027-Cx	M74I/N75E/K76T/A220S/Q271E/N326S/I356T/R371I
988	PH0031-Cx	1011-PF-KH-SU	Cambodia	Pursat	12.709	104.917	12.3652	103.636	2007	AS-SE-E	S258L/F313S	PH0031-Cx	M74I/N75E/K76T/A220S/Q271E/N326S/I356T/R371I
990	PH0043-C	1012-PF-KH-WHITE	Cambodia	Pailin	12.709	104.917	12.8784	102.633	2007	AS-SE-E	S258L/F313S	PH0043-C	M74I/N75E/K76T/A220S/Q271E/N326S/I356T/R371I
991	PH0044-C	1031-PF-SEA-PLOWE	Cambodia	Pailin	12.709	104.917	12.8784	102.633	2008	AS-SE-E	S258L/F313S	PH0044-C	M74I/N75E/K76T/A220S/Q271E/N326S/I356T/R371I
992	PH0045-C	1031-PF-SEA-PLOWE	Cambodia	Pailin	12.709	104.917	12.8784	102.633	2008	AS-SE-E	S258L/F313S	PH0045-C	M74I/N75E/K76T/A220S/Q271E/N326S/I356T/R371I
994	PH0121-CW	1031-PF-SEA-PLOWE	Cambodia	Pailin	12.709	104.917	12.8784	102.633	2008	AS-SE-E	S258L/F313S	PH0121-CW	M74I/N75E/K76T/A220S/Q271E/N326S/I356T/R371I
996	PH0122-CW	1031-PF-SEA-PLOWE	Cambodia	Pailin	12.709	104.917	12.8784	102.633	2008	AS-SE-E	S258L/F313S	PH0122-CW	M74I/N75E/K76T/A220S/Q271E/N326S/I356T/R371I
1024	PH0124-CW	1031-PF-SEA-PLOWE	Cambodia	Pailin	12.709	104.917	12.8784	102.633	2008	AS-SE-E	S258L/F313S	PH0124-CW	M74I/N75E/K76T/A220S/Q271E/N326S/I356T/R371I
1025	PH0125-CW	1031-PF-SEA-PLOWE	Cambodia	Pailin	12.709	104.917	12.8784	102.633	2008	AS-SE-E	S258L/F313S	PH0125-CW	M74I/N75E/K76T/A220S/Q271E/N326S/I356T/R371I
1027	PH0126-CW	1031-PF-SEA-PLOWE	Cambodia	Pailin	12.709	104.917	12.8784	102.633	2008	AS-SE-E	S258L/F313S	PH0126-CW	M74I/N75E/K76T/A220S/Q271E/N326S/I356T/R371I
1028	PH0130-CW	1031-PF-SEA-PLOWE	Cambodia	Pailin	12.709	104.917	12.8784	102.633	2008	AS-SE-E	S258L/F313S	PH0130-CW	M74I/N75E/K76T/A220S/Q271E/N326S/I356T/R371I
1029	PH0131-CW	1031-PF-SEA-PLOWE	Cambodia	Pailin	12.709	104.917	12.8784	102.633	2008	AS-SE-E	S258L/F313S	PH0131-CW	M74I/N75E/K76T/A220S/Q271E/N326S/I356T/R371I
1031	PH0132-CW	1031-PF-SEA-PLOWE	Cambodia	Pailin	12.709	104.917	12.8784	102.633	2008	AS-SE-E	S258L/F313S	PH0132-CW	M74I/N75E/K76T/A220S/Q271E/N326S/I356T/R371I
1032	PH0133-CW	1031-PF-SEA-PLOWE	Cambodia	Pailin	12.709	104.917	12.8784	102.633	2008	AS-SE-E	S258L/F313S	PH0133-CW	M74I/N75E/K76T/A220S/Q271E/N326S/I356T/R371I
1035	PH0134-C	1031-PF-SEA-PLOWE	Cambodia	Pailin	12.709	104.917	12.8784	102.633	2008	AS-SE-E	S258L/F313S	PH0134-C	M74I/N75E/K76T/A220S/Q271E/N326S/I356T/R371I
1036	PH0136-C	1031-PF-SEA-PLOWE	Cambodia	Pailin	12.709	104.917	12.8784	102.633	2008	AS-SE-E	S258L/F313S	PH0136-C	M74I/N75E/K76T/A220S/Q271E/N326S/I356T/R371I
10341	PH0138-CW	1031-PF-SEA-PLOWE	Cambodia	Battambang	12.709	104.917	12.9792	103.102	2008	AS-SE-E	S258L/F313S	PH0138-CW	M74I/N75E/K76T/A220S/Q271E/N326S/I356T/R371I
435	PH0145-CW	1031-PF-SEA-PLOWE	Cambodia	Battambang	12.709	104.917	12.9792	103.102	2008	AS-SE-E	S258L/F313S	PH0145-CW	M74I/N75E/K76T/A220S/Q271E/N326S/I356T/R371I
437	PH0150-CW	1031-PF-SEA-PLOWE	Cambodia	Battambang	12.709	104.917	12.9792	103.102	2008	AS-SE-E	S258L/F313S	PH0150-CW	M74I/N75E/K76T/A220S/Q271E/N326S/I356T/R371I
439	PH0151-CW	1031-PF-SEA-PLOWE	Cambodia	Battambang	12.709	104.917	12.9792	103.102	2008	AS-SE-E	S258L/F313S	PH0151-CW	M74I/N75E/K76T/A220S/Q271E/N326S/I356T/R371I
452	PH0152-CW	1031-PF-SEA-PLOWE	Cambodia	Battambang	12.709	104.917	12.9792	103.102	2008	AS-SE-E	S258L/F313S	PH0152-CW	M74I/N75E/K76T/A220S/Q271E/N326S/I356T/R371I
453	PH0234-C	1031-PF-SEA-PLOWE	Cambodia	Pailin	12.709	104.917	12.8784	102.633	2008	AS-SE-E	S258L/F313S	PH0234-C	M74I/N75E/K76T/A220S/Q271E/N326S/I356T/R371I
454	PH0236-C	1031-PF-SEA-PLOWE	Cambodia	Pailin	12.709	104.917	12.8784	102.633	2008	AS-SE-E	S258L/F313S	PH0236-C	M74I/N75E/K76T/A220S/Q271E/N326S/I356T/R371I
456	PH0408-C	1031-PF-SEA-PLOWE	Cambodia	Battambang	12.709	104.917	12.9792	103.102	2008	AS-SE-E	S258L/F313S	PH0408-C	M74I/N75E/K76T/A220S/Q271E/N326S/I356T/R371I
457	PH0410-C	1031-PF-SEA-PLOWE	Cambodia	Battambang	12.709	104.917	12.9792	103.102	2008	AS-SE-E	S258L/F313S	PH0410-C	M74I/N75E/K76T/A220S/Q271E/N326S/I356T/R371I
458	PH0415-C	1031-PF-SEA-PLOWE	Cambodia	Battambang	12.709	104.917	12.9792	103.102	2008	AS-SE-E	S258L/F313S	PH0415-C	M74I/N75E/K76T/A220S/Q271E/N326S/I356T/R371I
459	PH0422-CW	1031-PF-SEA-PLOWE	Cambodia	Battambang	12.709	104.917	12.9792	103.102	2008	AS-SE-E	S258L/F313S	PH0422-CW	M74I/N75E/K76T/A220S/Q271E/N326S/I356T/R371I
460	PH0444-C	1031-PF-SEA-PLOWE	Cambodia	Pailin	12.709	104.917	12.8784	102.633	2008	AS-SE-E	S258L/F313S	PH0444-C	M74I/N75E/K76T/A220S/Q271E/N326S/I356T/R371I
468	PH0047-Cx	1044-PF-KH-FAIRHURST	Cambodia	Pursat	12.709	104.917	12.3652	103.636	2009	AS-SE-E	S258L/F313S	PH0047-Cx	M74I/N75E/K76T/A220S/Q271E/R371I
469	PH0051-Cx	1044-PF-KH-FAIRHURST	Cambodia	Pursat	12.709	104.917	12.3652	103.636	2009	AS-SE-E	S258L/F313S	PH0051-Cx	M74I/N75E/K76T/A220S/Q271E/N326S/I356T/R371I
486	PH0057-C	1044-PF-KH-FAIRHURST	Cambodia	Pursat	12.709	104.917	12.3652	103.636	2009	AS-SE-E	S258L/F313S	PH0057-C	M74I/N75E/K76T/A220S/Q271E/N326S/I356T/R371I
490	PH0063-C	1044-PF-KH-FAIRHURST	Cambodia	Pursat	12.709	104.917	12.3652	103.636	2009	AS-SE-E	S258L/F313S	PH0063-C	M74I/N75E/K76T/A220S/Q271E/N326S/I356T/R371I
998	PH0110-C	1031-PF-SEA-PLOWE	Cambodia	Pailin	12.709	104.917	12.8784	102.633	2009	AS-SE-E	S258L/F313S	PH0110-C	M74I/N75E/K76T/A220S/Q271E/N326S/I356T/R371I
999	PH0111-C	1031-PF-SEA-PLOWE	Cambodia	Pailin	12.709	104.917	12.8784	102.633	2009	AS-SE-E	S258L/F313S	PH0111-C	M74I/N75E/K76T/A220S/Q271E/N326S/I356T/R371I
1000	PH0112-C	1031-PF-SEA-PLOWE	Cambodia	Pailin	12.709	104.917	12.8784	102.633	2009	AS-SE-E	S258L/F313S	PH0112-C	M74I/N75E/K76T/A220S/Q271E/N326S/I356T/R371I
1001	PH0114-C	1031-PF-SEA-PLOWE	Cambodia	Pailin	12.709	104.917	12.8784	102.633	2009	AS-SE-E	S258L/F313S	PH0114-C	M74I/N75E/K76T/A220S/Q271E/N326S/I356T/R371I
1003	PH0116-C	1031-PF-SEA-PLOWE	Cambodia	Pailin	12.709	104.917	12.8784	102.633	2009	AS-SE-E	S258L/F313S	PH0116-C	M74I/N75E/K76T/A220S/Q271E/N326S/I356T/R371I
1004	PH0117-C	1031-PF-SEA-PLOWE	Cambodia	Pailin	12.709	104.917	12.8784	102.633	2009	AS-SE-E	S258L/F313S	PH0117-C	M74I/N75E/K76T/A220S/Q271E/N326S/I356T/R371I
1005	PH0118-C	1031-PF-SEA-PLOWE	Cambodia	Pailin	12.709	104.917	12.8784	102.633	2009	AS-SE-E	S258L/F313S	PH0118-C	M74I/N75E/K76T/A220S/Q271E/N326S/I356T/R371I
1007	PH0140-CW	1031-PF-SEA-PLOWE	Cambodia	Battambang	12.709	104.917	12.9792	103.102	2009	AS-SE-E	S258L/F313S	PH0140-CW	M74I/N75E/K76T/A220S/Q271E/N326S/I356T/R371I
1008	PH0143-CW	1031-PF-SEA-PLOWE	Cambodia	Battambang	12.709	104.917	12.9792	103.102	2009	AS-SE-E	S258L/F313S	PH0143-CW	M74I/N75E/K76T/A220S/Q271E/N326S/I356T/R371I
1009	PH0146-CW	1031-PF-SEA-PLOWE	Cambodia	Battambang	12.709	104.917	12.9792	103.102	2009	AS-SE-E	S258L/F313S	PH0146-CW	M74I/N75E/K76T/A220S/Q271E/N326S/I356T/R371I
1010	PH0147-CW	1031-PF-SEA-PLOWE	Cambodia	Battambang	12.709	104.917	12.9792	103.102	2009	AS-SE-E	S258L/F313S	PH0147-CW	M74I/N75E/K76T/A220S/Q271E/N326S/I356T/R371I
1011	PH0149-CW	1031-PF-SEA-PLOWE	Cambodia	Battambang	12.709	104.917	12.9792	103.102	2009	AS-SE-E	S258L/F313S	PH0149-CW	M74I/N75E/K76T/A220S/Q271E/N326S/I356T/R371I
1012	PH0153-CW	1031-PF-SEA-PLOWE	Cambodia	Battambang	12.709	104.917	12.9792	103.102	2009	AS-SE-E	S258L/F313S	PH0153-CW	M74I/N75E/K76T/A220S/Q271E/N326S/I356T/R371I
1013	PH0156-C	1031-PF-SEA-PLOWE	Cambodia	Battambang	12.709	104.917	12.9792	103.102	2009	AS-SE-E	S258L/F313S	PH0156-C	M74I/N75E/K76T/A220S/Q271E/N326S/I356T/R371I
1015	PH0386-C	1031-PF-SEA-PLOWE	Cambodia	Battambang	12.709	104.917	12.9792	103.102	2009	AS-SE-E	S258L/F313S	PH0386-C	M74I/N75E/K76T/A220S/Q271E/N326S/I356T/R371I
1016	PH0387-C	1031-PF-SEA-PLOWE	Cambodia	Battambang	12.709	104.917	12.9792	103.102	2009	AS-SE-E	S258L/F313S	PH0387-C	M74I/N75E/K76T/A220S/Q271E/N326S/I356T/R371I
1017	PH0389-C	1031-PF-SEA-PLOWE	Cambodia	Battambang	12.709	104.917	12.9792	103.102	2009	AS-SE-E	S258L/F313S	PH0389-C	M74I/N75E/K76T/A220S/Q271E/N326S/I356T/R371I
1037	PH0391-C	1031-PF-SEA-PLOWE	Cambodia	Battambang	12.709	104.917	12.9792	103.102	2009	AS-SE-E	S258L/F313S	PH0391-C	M74I/N75E/K76T/A220S/Q271E/N326S/I356T/R371I
1038	PH0407-C	1031-PF-SEA-PLOWE	Cambodia	Battambang	12.709	104.917	12.9792	103.102	2009	AS-SE-E	S258L/F313S	PH0407-C	M74I/N75E/K76T/A220S/Q271E/N326S/I356T/R371I
1039	PH0411-C	1031-PF-SEA-PLOWE	Cambodia	Battambang	12.709	104.917	12.9792	103.102	2009	AS-SE-E	S258L/F313S	PH0411-C	M74I/N75E/K76T/A220S/Q271E/N326S/I356T/R371I
1040	PH0413-C	1031-PF-SEA-PLOWE	Cambodia	Battambang	12.709	104.917	12.9792	103.102	2009	AS-SE-E	S258L/F313S	PH0413-C	M74I/N75E/K76T/A220S/Q271E/N326S/G353V/I356T/R371I
1042	PH0418-C	1031-PF-SEA-PLOWE	Cambodia	Battambang	12.709	104.917	12.9792	103.102	2009	AS-SE-E	S258L/F313S	PH0418-C	M74I/N75E/K76T/A220S/Q271E/N326S/I356T/R371I
1043	PH0420-CW	1031-PF-SEA-PLOWE	Cambodia	Battambang	12.709	104.917	12.9792	103.102	2009	AS-SE-E	S258L/F313S	PH0420-CW	M74I/N75E/K76T/A220S/Q271E/R371I
1044	PH0494-CW	1044-PF-KH-FAIRHURST	Cambodia	Pursat	12.709	104.917	12.3652	103.636	2009	AS-SE-E	S258L/F313S	PH0494-CW	M74I/N75E/K76T/H97L/A220S/Q271E/N326S/I356T/R371I
1045	PH0495-CW	1044-PF-KH-FAIRHURST	Cambodia	Pursat	12.709	104.917	12.3652	103.636	2009	AS-SE-E	S258L/F313S	PH0495-CW	M74I/N75E/K76T/A220S/Q271E/N326S/I356T/R371I
1046	PH0497-C	1044-PF-KH-FAIRHURST	Cambodia	Pursat	12.709	104.917	12.3652	103.636	2009	AS-SE-E	S258L/F313S	PH0497-C	M74I/N75E/K76T/A220S/Q271E/N326S/I356T/R371I
1047	PH0498-C	1044-PF-KH-FAIRHURST	Cambodia	Pursat	12.709	104.917	12.3652	103.636	2009	AS-SE-E	S258L/F313S	PH0498-C	M74I/N75E/K76T/A220S/Q271E/N326S/I356T/R371I
1049	PH0164-C	1044-PF-KH-FAIRHURST	Cambodia	Pursat	12.709	104.917	12.3652	103.636	2010	AS-SE-E	S258L/F313S	PH0164-C	M74I/N75E/K76T/A220S/Q271E/N326S/I356T/R371I
1050	PH0171-C	1044-PF-KH-FAIRHURST	Cambodia	Pursat	12.709	104.917	12.3652	103.636	2010	AS-SE-E	S258L/F313S	PH0171-C	M74I/N75E/K76T/H97L/A220S/Q271E/N326S/I356T/R371I
419	PH0172-C	1044-PF-KH-FAIRHURST	Cambodia	Pursat	12.709	104.917	12.3652	103.636	2010	AS-SE-E	S258L/F313S	PH0172-C	M74I/N75E/K76T/A220S/Q271E/N326S/I356T/R371I
420	PH0191-C	1044-PF-KH-FAIRHURST	Cambodia	Pursat	12.709	104.917	12.3652	103.636	2010	AS-SE-E	S258L/F313S	PH0191-C	M74I/N75E/K76T/A220S/Q271E/N326S/I356T/R371I
421	PH0192-C	1044-PF-KH-FAIRHURST	Cambodia	Pursat	12.709	104.917	12.3652	103.636	2010	AS-SE-E	S258L/F313S	PH0192-C	M74I/N75E/K76T/A220S/Q271E/N326S/I356T/R371I
422	PH0197-C	1044-PF-KH-FAIRHURST	Cambodia	Pursat	12.709	104.917	12.3652	103.636	2010	AS-SE-E	S258L/F313S	PH0197-C	M74I/N75E/K76T/A220S/Q271E/N326S/I356T/R371I
423	PH0198-C	1044-PF-KH-FAIRHURST	Cambodia	Pursat	12.709	104.917	12.3652	103.636	2010	AS-SE-E	S258L/F313S	PH0198-C	M74I/N75E/K76T/A220S/Q271E/N326S/I356T/R371I
424	PH0209-C	1044-PF-KH-FAIRHURST	Cambodia	Pursat	12.709	104.917	12.3652	103.636	2010	AS-SE-E	S258L/F313S	PH0209-C	M74I/N75E/K76T/A220S/Q271E/N326S/I356T/R371I
425	PH0218-C	1031-PF-SEA-PLOWE	Cambodia	Pailin	12.709	104.917	12.8784	102.633	2010	AS-SE-E	S258L/F313S	PH0218-C	M74I/N75E/K76T/H97Y/A220S/Q271E/N326S/I356T/R371I
426	PH0222-C	1031-PF-SEA-PLOWE	Cambodia	Pailin	12.709	104.917	12.8784	102.633	2010	AS-SE-E	S258L/F313S	PH0222-C	M74I/N75E/K76T/A220S/Q271E/N326S/I356T/R371I
427	PH0223-CW	1031-PF-SEA-PLOWE	Cambodia	Pailin	12.709	104.917	12.8784	102.633	2010	AS-SE-E	S258L/F313S	PH0223-CW	M74I/N75E/K76T/A220S/Q271E/N326S/I356T/R371I
430	PH0224-C	1031-PF-SEA-PLOWE	Cambodia	Pailin	12.709	104.917	12.8784	102.633	2010	AS-SE-E	S258L/F313S	PH0224-C	M74I/N75E/K76T/A220S/Q271E/N326S/I356T/R371I
433	PH0237-C	1044-PF-KH-FAIRHURST	Cambodia	Pursat	12.709	104.917	12.3652	103.636	2010	AS-SE-E	S258L/F313S	PH0237-C	M74I/N75E/K76T/A220S/Q271E/N326S/M343L/I356T/R371I
461	PH0239-C	1044-PF-KH-FAIRHURST	Cambodia	Pursat	12.709	104.917	12.3652	103.636	2010	AS-SE-E	S258L/F313S	PH0239-C	M74I/N75E/K76T/A220S/Q271E/N326S/I356T/R371I
462	PH0240-C	1044-PF-KH-FAIRHURST	Cambodia	Pursat	12.709	104.917	12.3652	103.636	2010	AS-SE-E	S258L/F313S	PH0240-C	M74I/N75E/K76T/A220S/Q271E/N326S/I356T/R371I
463	PH0241-C	1044-PF-KH-FAIRHURST	Cambodia	Pursat	12.709	104.917	12.3652	103.636	2010	AS-SE-E	S258L/F313S	PH0241-C	M74I/N75E/K76T/A220S/Q271E/N326S/I356T/R371I
470	PH0243-C	1044-PF-KH-FAIRHURST	Cambodia	Pursat	12.709	104.917	12.3652	103.636	2010	AS-SE-E	S258L/F313S	PH0243-C	M74I/N75E/K76T/A220S/T256I/Q271E/N326S/I356T/R371I
471	PH0245-C	1044-PF-KH-FAIRHURST	Cambodia	Pursat	12.709	104.917	12.3652	103.636	2010	AS-SE-E	S258L/F313S	PH0245-C	M74I/N75E/K76T/A220S/T230I/T256I/Q271E/N326S/I356T/R371I
473	PH0247-C	1044-PF-KH-FAIRHURST	Cambodia	Pursat	12.709	104.917	12.3652	103.636	2010	AS-SE-E	S258L/F313S	PH0247-C	M74I/N75E/K76T/A220S/T256I/Q271E/N326S/I356T/R371I
474	PH0248-C	1044-PF-KH-FAIRHURST	Cambodia	Pursat	12.709	104.917	12.3652	103.636	2010	AS-SE-E	S258L/F313S	PH0248-C	M74I/N75E/K76T/A220S/Q271E/N326S/I356T/R371I
476	PH0249-C	1044-PF-KH-FAIRHURST	Cambodia	Pursat	12.709	104.917	12.3652	103.636	2010	AS-SE-E	S258L/F313S	PH0249-C	M74I/N75E/K76T/A220S/T256I/Q271E/N326S/I356T/R371I
477	PH0250-C	1044-PF-KH-FAIRHURST	Cambodia	Pursat	12.709	104.917	12.3652	103.636	2010	AS-SE-E	S258L/F313S	PH0250-C	M74I/N75E/K76T/A220S/Q271E/N326S/I356T/R371I
479	PH0252-C	1044-PF-KH-FAIRHURST	Cambodia	Pursat	12.709	104.917	12.3652	103.636	2010	AS-SE-E	S258L/F313S	PH0252-C	M74I/N75E/K76T/A220S/Q271E/N326S/I356T/R371I
480	PH0253-C	1044-PF-KH-FAIRHURST	Cambodia	Pursat	12.709	104.917	12.3652	103.636	2010	AS-SE-E	S258L/F313S	PH0253-C	M74I/N75E/K76T/A220S/Q271E/N326S/I356T/R371I
482	PH0278-CW	1044-PF-KH-FAIRHURST	Cambodia	Pursat	12.709	104.917	12.3652	103.636	2010	AS-SE-E	S258L/F313S	PH0278-CW	M74I/N75E/K76T/A220S/Q271E/N326S/G353V/I356T/R371I
483	PH0279-C	1044-PF-KH-FAIRHURST	Cambodia	Pursat	12.709	104.917	12.3652	103.636	2010	AS-SE-E	S258L/F313S	PH0279-C	M74I/N75D/K76T/A144F/L148I/I194T/A220S/Q271E/T333S
485	PH0282-C	1044-PF-KH-FAIRHURST	Cambodia	Pursat	12.709	104.917	12.3652	103.636	2010	AS-SE-E	S258L/F313S	PH0282-C	M74I/N75E/K76T/A220S/Q271E/N326S/I356T/R371I
491	PH0294-C	1044-PF-KH-FAIRHURST	Cambodia	Pursat	12.709	104.917	12.3652	103.636	2010	AS-SE-E	S258L/F313S	PH0294-C	M74I/N75E/K76T/A220S/Q271E/N326S/I356T/R371I
493	PH0303-CW	1044-PF-KH-FAIRHURST	Cambodia	Pursat	12.709	104.917	12.3652	103.636	2010	AS-SE-E	S258L/F313S	PH0303-CW	M74I/N75E/K76T/A220S/Q271E/N326S/I356T/R371I
1018	PH0306-C	1044-PF-KH-FAIRHURST	Cambodia	Pursat	12.709	104.917	12.3652	103.636	2010	AS-SE-E	S258L/F313S	PH0306-C	M74I/N75E/K76T/A220S/Q271E/N326S/I356T/R371I
10252	PH0308-CW	1044-PF-KH-FAIRHURST	Cambodia	Pursat	12.709	104.917	12.3652	103.636	2010	AS-SE-E	S258L/F313S	PH0308-CW	M74I/N75E/K76T/A220S/Q271E/N326S/I356T/R371I
10253	PH0322-C	1044-PF-KH-FAIRHURST	Cambodia	Pursat	12.709	104.917	12.3652	103.636	2010	AS-SE-E	S258L/F313S	PH0322-C	M74I/N75E/K76T/H97L/A220S/Q271E/N326S/I356T/R371I
10257	PH0326-C	1044-PF-KH-FAIRHURST	Cambodia	Pursat	12.709	104.917	12.3652	103.636	2010	AS-SE-E	S258L/F313S	PH0326-C	M74I/N75E/K76T/A220S/Q271E/N326S/I356T/R371I
10259	PH0327-C	1044-PF-KH-FAIRHURST	Cambodia	Pursat	12.709	104.917	12.3652	103.636	2010	AS-SE-E	S258L/F313S	PH0327-C	M74I/N75E/K76T/A220S/Q271E/N326S/I356T/R371I
10260	PH0329-C	1044-PF-KH-FAIRHURST	Cambodia	Pursat	12.709	104.917	12.3652	103.636	2010	AS-SE-E	S258L/F313S	PH0329-C	M74I/N75E/K76T/A220S/Q271E/N326S/I356T/R371I
617	PH0337-C	1044-PF-KH-FAIRHURST	Cambodia	Pursat	12.709	104.917	12.3652	103.636	2010	AS-SE-E	S258L/F313S	PH0337-C	M74I/N75D/K76T/A144F/L148I/I194T/A220S/Q271E/T333S
678	PH0338-C	1044-PF-KH-FAIRHURST	Cambodia	Pursat	12.709	104.917	12.3652	103.636	2010	AS-SE-E	S258L/F313S	PH0338-C	M74I/N75E/K76T/A220S/Q271E/N326S/I356T/R371I
707	PH0339-C	1044-PF-KH-FAIRHURST	Cambodia	Ratanakiri	12.709	104.917	13.7929	107.087	2010	AS-SE-E	S258L/F313S	PH0339-C	M74I/N75E/K76T/A220S/Q271E/N326S/I356T/R371I
708	PH0347-C	1044-PF-KH-FAIRHURST	Cambodia	Ratanakiri	12.709	104.917	13.7929	107.087	2010	AS-SE-E	S258L/F313S	PH0347-C	M74I/N75E/K76T/A220S/Q271E/R371I
709	PH0352-C	1044-PF-KH-FAIRHURST	Cambodia	Ratanakiri	12.709	104.917	13.7929	107.087	2010	AS-SE-E	S258L/F313S	PH0352-C	M74I/N75D/K76T/A144F/L148I/I194T/A220S/Q271E/T333S
710	PH0357-C	1044-PF-KH-FAIRHURST	Cambodia	Ratanakiri	12.709	104.917	13.7929	107.087	2010	AS-SE-E	S258L/F313S	PH0357-C	M74I/N75D/K76T/A144F/L148I/I194T/A220S/Q271E/T333S
737	PH0371-C	1044-PF-KH-FAIRHURST	Cambodia	Ratanakiri	12.709	104.917	13.7929	107.087	2010	AS-SE-E	S258L/F313S	PH0371-C	M74I/N75D/K76T/A144F/L148I/I194T/A220S/Q271E/T333S
738	PH0373-C	1044-PF-KH-FAIRHURST	Cambodia	Ratanakiri	12.709	104.917	13.7929	107.087	2010	AS-SE-E	S258L/F313S	PH0373-C	M74I/N75E/K76T/A220S/Q271E/R371I
739	PH0375-C	1044-PF-KH-FAIRHURST	Cambodia	Ratanakiri	12.709	104.917	13.7929	107.087	2010	AS-SE-E	S258L/F313S	PH0375-C	M74I/N75E/K76T/A220S/Q271E/R371I
740	PH0455-C	1044-PF-KH-FAIRHURST	Cambodia	Pursat	12.709	104.917	12.3652	103.636	2010	AS-SE-E	S258L/F313S	PH0455-C	M74I/N75E/K76T/A220S/Q271E/N326S/I356T/R371I
742	PH0456-C	1044-PF-KH-FAIRHURST	Cambodia	Pursat	12.709	104.917	12.3652	103.636	2010	AS-SE-E	S258L/F313S	PH0456-C	M74I/N75E/K76T/A220S/Q271E/N326S/I356T/R371I
743	PH0462-C	1044-PF-KH-FAIRHURST	Cambodia	Pursat	12.709	104.917	12.3652	103.636	2010	AS-SE-E	S258L/F313S	PH0462-C	M74I/N75E/K76T/A220S/Q271E/N326S/I356T/R371I
744	PH0464-CW	1044-PF-KH-FAIRHURST	Cambodia	Pursat	12.709	104.917	12.3652	103.636	2010	AS-SE-E	S258L/F313S	PH0464-CW	M74I/N75E/K76T/A220S/Q271E/N326S/I356T/R371I
745	PH0465-CW	1044-PF-KH-FAIRHURST	Cambodia	Pursat	12.709	104.917	12.3652	103.636	2010	AS-SE-E	S258L/F313S	PH0465-CW	M74I/N75E/K76T/A220S/Q271E/N326S/I356T/R371I
747	PH0466-C	1044-PF-KH-FAIRHURST	Cambodia	Pursat	12.709	104.917	12.3652	103.636	2010	AS-SE-E	S258L/F313S	PH0466-C	M74I/N75D/K76T/A144F/L148I/I194T/A220S/Q271E/T333S
1783	PH0467-CW	1044-PF-KH-FAIRHURST	Cambodia	Pursat	12.709	104.917	12.3652	103.636	2010	AS-SE-E	S258L/F313S	PH0467-CW	M74I/N75E/K76T/A220S/Q271E/N326S/G353V/I356T/R371I
1784	PH0469-CW	1044-PF-KH-FAIRHURST	Cambodia	Pursat	12.709	104.917	12.3652	103.636	2010	AS-SE-E	S258L/F313S	PH0469-CW	M74I/N75E/K76T/A220S/Q271E/N326S/I356T/R371I
1785	PH0471-C	1044-PF-KH-FAIRHURST	Cambodia	Pursat	12.709	104.917	12.3652	103.636	2010	AS-SE-E	S258L/F313S	PH0471-C	M74I/N75E/K76T/A220S/Q271E/N326S/I356T/R371I
1786	PH0473-C	1044-PF-KH-FAIRHURST	Cambodia	Pursat	12.709	104.917	12.3652	103.636	2010	AS-SE-E	S258L/F313S	PH0473-C	M74I/N75E/K76T/A220S/Q271E/N326S/I356T/R371I
1787	PH0474-CW	1044-PF-KH-FAIRHURST	Cambodia	Pursat	12.709	104.917	12.3652	103.636	2010	AS-SE-E	S258L/F313S	PH0474-CW	M74I/N75E/K76T/A220S/Q271E/N326S/I356T/R371I
1788	PH0476-C	1044-PF-KH-FAIRHURST	Cambodia	Pursat	12.709	104.917	12.3652	103.636	2010	AS-SE-E	S258L/F313S	PH0476-C	M74I/N75E/K76T/A220S/Q271E/N326S/I356T/R371I
1789	PH0480-C	1044-PF-KH-FAIRHURST	Cambodia	Pursat	12.709	104.917	12.3652	103.636	2010	AS-SE-E	S258L/F313S	PH0480-C	M74I/N75E/K76T/A220S/Q271E/N326S/I356T/R371I
1790	PH0481-C	1044-PF-KH-FAIRHURST	Cambodia	Pursat	12.709	104.917	12.3652	103.636	2010	AS-SE-E	S258L/F313S	PH0481-C	M74I/N75E/K76T/A220S/Q271E/N326S/I356T/R371I
466	PH0483-CW	1044-PF-KH-FAIRHURST	Cambodia	Pursat	12.709	104.917	12.3652	103.636	2010	AS-SE-E	S258L/F313S	PH0483-CW	M74I/N75E/K76T/A220S/Q271E/N326S/I356T/R371I
618	PH0493-C	1044-PF-KH-FAIRHURST	Cambodia	Pursat	12.709	104.917	12.3652	103.636	2010	AS-SE-E	S258L/F313S	PH0493-C	M74I/N75E/K76T/A220S/Q271E/N326S/I356T/R371I
619	PH0499-CW	1044-PF-KH-FAIRHURST	Cambodia	Pursat	12.709	104.917	12.3652	103.636	2010	AS-SE-E	S258L/F313S	PH0499-CW	M74I/N75E/K76T/A220S/Q271E/N326S/I356T/R371I
620	PH0484-C	1044-PF-KH-FAIRHURST	Cambodia	Pursat	12.709	104.917	12.3652	103.636	2011	AS-SE-E	S258L/F313S	PH0484-C	M74I/N75E/K76T/A220S/T256I/Q271E/N326S/I356T/R371I
621	PH0485-C	1044-PF-KH-FAIRHURST	Cambodia	Pursat	12.709	104.917	12.3652	103.636	2011	AS-SE-E	S258L/F313S	PH0485-C	M74I/N75D/K76T/A144F/L148I/I194T/A220S/Q271E/T333S
623	PH0486-C	1044-PF-KH-FAIRHURST	Cambodia	Pursat	12.709	104.917	12.3652	103.636	2011	AS-SE-E	S258L/F313S	PH0486-C	M74I/N75E/K76T/A220S/Q271E/N326S/M343L/I356T/R371I
624	PH0489-C	1044-PF-KH-FAIRHURST	Cambodia	Pursat	12.709	104.917	12.3652	103.636	2011	AS-SE-E	S258L/F313S	PH0489-C	M74I/N75E/K76T/A220S/Q271E/N326S/I356T/R371I
627	PH0490-C	1044-PF-KH-FAIRHURST	Cambodia	Pursat	12.709	104.917	12.3652	103.636	2011	AS-SE-E	S258L/F313S	PH0490-C	M74I/N75E/K76T/A220S/Q271E/N326S/I356T/R371I
628	PH0513-C	1052-PF-TRAC-WHITE	Cambodia	Preah Vihear	12.709	104.917	13.798	105.008	2011	AS-SE-E	S258L/F313S	PH0513-C	M74I/N75E/K76T/A220S/Q271E/R371I
630	PH0514-C	1052-PF-TRAC-WHITE	Cambodia	Preah Vihear	12.709	104.917	13.798	105.008	2011	AS-SE-E	S258L/F313S	PH0514-C	M74I/N75E/K76T/A220S/Q271E/N326S/I356T/R371I
631	PH0516-C	1052-PF-TRAC-WHITE	Cambodia	Preah Vihear	12.709	104.917	13.798	105.008	2011	AS-SE-E	S258L/F313S	PH0516-C	M74I/N75E/K76T/A220S/Q271E/N326S/I356T/R371I
632	PH0517-C	1052-PF-TRAC-WHITE	Cambodia	Preah Vihear	12.709	104.917	13.798	105.008	2011	AS-SE-E	S258L/F313S	PH0517-C	M74I/N75E/K76T/A220S/Q271E/R371I
633	PH0518-C	1052-PF-TRAC-WHITE	Cambodia	Preah Vihear	12.709	104.917	13.798	105.008	2011	AS-SE-E	S258L/F313S	PH0518-C	M74I/N75E/K76T/A220S/Q271E/N326S/I356T/R371I
634	PH0519-C	1052-PF-TRAC-WHITE	Cambodia	Preah Vihear	12.709	104.917	13.798	105.008	2011	AS-SE-E	S258L/F313S	PH0519-C	M74I/N75E/K76T/A220S/Q271E/N326S/I356T/R371I
635	PH0520-C	1052-PF-TRAC-WHITE	Cambodia	Preah Vihear	12.709	104.917	13.798	105.008	2011	AS-SE-E	S258L/F313S	PH0520-C	M74I/N75E/K76T/A220S/Q271E/N326S/I356T/R371I
636	PH0521-C	1052-PF-TRAC-WHITE	Cambodia	Preah Vihear	12.709	104.917	13.798	105.008	2011	AS-SE-E	S258L/F313S	PH0521-C	M74I/N75E/K76T/A220S/Q271E/N326S/I356T/R371I
637	PH0523-C	1052-PF-TRAC-WHITE	Cambodia	Preah Vihear	12.709	104.917	13.798	105.008	2011	AS-SE-E	S258L/F313S	PH0523-C	M74I/N75E/K76T/A220S/Q271E/N326S/I356T/R371I
638	PH0525-C	1052-PF-TRAC-WHITE	Cambodia	Preah Vihear	12.709	104.917	13.798	105.008	2011	AS-SE-E	S258L/F313S	PH0525-C	M74I/N75E/K76T/A220S/Q271E/N326S/I356T/R371I
640	PH0528-C	1052-PF-TRAC-WHITE	Cambodia	Pursat	12.709	104.917	12.3652	103.636	2011	AS-SE-E	S258L/F313S	PH0528-C	M74I/N75E/K76T/A220S/Q271E/N326S/I356T/R371I
641	PH0529-C	1052-PF-TRAC-WHITE	Cambodia	Pursat	12.709	104.917	12.3652	103.636	2011	AS-SE-E	S258L/F313S	PH0529-C	M74I/N75E/K76T/A220S/Q271E/N326S/G353V/I356T/R371I
643	PH0530-C	1052-PF-TRAC-WHITE	Cambodia	Pursat	12.709	104.917	12.3652	103.636	2011	AS-SE-E	S258L/F313S	PH0530-C	M74I/N75E/K76T/A220S/Q271E/N326S/I356T/R371I
681	PH0531-C	1052-PF-TRAC-WHITE	Cambodia	Pursat	12.709	104.917	12.3652	103.636	2011	AS-SE-E	S258L/F313S	PH0531-C	M74I/N75E/K76T/A220S/Q271E/N326S/I356T/R371I
683	PH0532-C	1052-PF-TRAC-WHITE	Cambodia	Pursat	12.709	104.917	12.3652	103.636	2011	AS-SE-E	S258L/F313S	PH0532-C	M74I/N75E/K76T/A220S/Q271E/N326S/I356T/R371I
685	PH0534-C	1052-PF-TRAC-WHITE	Cambodia	Pursat	12.709	104.917	12.3652	103.636	2011	AS-SE-E	S258L/F313S	PH0534-C	M74I/N75E/K76T/A220S/Q271E/N326S/I356T/R371I
686	PH0538-C	1052-PF-TRAC-WHITE	Cambodia	Pursat	12.709	104.917	12.3652	103.636	2011	AS-SE-E	S258L/F313S	PH0538-C	M74I/N75E/K76T/A220S/Q271E/N326S/I356T/R371I
687	PH0544-C	1052-PF-TRAC-WHITE	Cambodia	Pursat	12.709	104.917	12.3652	103.636	2011	AS-SE-E	S258L/F313S	PH0544-C	M74I/N75E/K76T/A220S/Q271E/N326S/G353V/I356T/R371I
688	PH0545-C	1052-PF-TRAC-WHITE	Cambodia	Pursat	12.709	104.917	12.3652	103.636	2011	AS-SE-E	S258L/F313S	PH0545-C	M74I/N75E/K76T/A220S/Q271E/N326S/I356T/R371I
690	PH0548-C	1052-PF-TRAC-WHITE	Cambodia	Pursat	12.709	104.917	12.3652	103.636	2011	AS-SE-E	S258L/F313S	PH0548-C	M74I/N75E/K76T/A220S/Q271E/N326S/I356T/R371I
693	PH0549-C	1052-PF-TRAC-WHITE	Cambodia	Pursat	12.709	104.917	12.3652	103.636	2011	AS-SE-E	S258L/F313S	PH0549-C	M74I/N75E/K76T/A220S/Q271E/N326S/I356T/R371I
694	PH0551-C	1052-PF-TRAC-WHITE	Cambodia	Pursat	12.709	104.917	12.3652	103.636	2011	AS-SE-E	S258L/F313S	PH0551-C	M74I/N75E/K76T/A220S/Q271E/N326S/I356T/R371I
696	PH0553-C	1052-PF-TRAC-WHITE	Cambodia	Pursat	12.709	104.917	12.3652	103.636	2011	AS-SE-E	S258L/F313S	PH0553-C	M74I/N75E/K76T/A220S/Q271E/N326S/I356T/R371I
711	PH0554-C	1052-PF-TRAC-WHITE	Cambodia	Pursat	12.709	104.917	12.3652	103.636	2011	AS-SE-E	S258L/F313S	PH0554-C	M74I/N75E/K76T/A220S/Q271E/N326S/I356T/R371I
712	PH0555-C	1052-PF-TRAC-WHITE	Cambodia	Pursat	12.709	104.917	12.3652	103.636	2011	AS-SE-E	S258L/F313S	PH0555-C	M74I/N75E/K76T/A220S/Q271E/N326S/I356T/R371I
713	PH0557-C	1052-PF-TRAC-WHITE	Cambodia	Pursat	12.709	104.917	12.3652	103.636	2011	AS-SE-E	S258L/F313S	PH0557-C	M74I/N75E/K76T/A220S/Q271E/N326S/I356T/R371I
714	PH0559-C	1052-PF-TRAC-WHITE	Cambodia	Pursat	12.709	104.917	12.3652	103.636	2011	AS-SE-E	S258L/F313S	PH0559-C	M74I/N75E/K76T/A220S/Q271E/N326S/I356T/R371I
715	PH0560-C	1052-PF-TRAC-WHITE	Cambodia	Pursat	12.709	104.917	12.3652	103.636	2011	AS-SE-E	S258L/F313S	PH0560-C	M74I/N75E/K76T/A220S/Q271E/N326S/G353V/I356T/R371I
716	PH0564-C	1052-PF-TRAC-WHITE	Cambodia	Pursat	12.709	104.917	12.3652	103.636	2011	AS-SE-E	S258L/F313S	PH0564-C	M74I/N75E/K76T/A220S/Q271E/N326S/I356T/R371I
717	PH0565-C	1052-PF-TRAC-WHITE	Cambodia	Pursat	12.709	104.917	12.3652	103.636	2011	AS-SE-E	S258L/F313S	PH0565-C	M74I/N75E/K76T/A220S/Q271E/N326S/I356T/R371I
718	PH0569-C	1052-PF-TRAC-WHITE	Cambodia	Pursat	12.709	104.917	12.3652	103.636	2011	AS-SE-E	S258L/F313S	PH0569-C	M74I/N75E/K76T/A220S/Q271E/N326S/I356T/R371I
719	PH0584-C	1052-PF-TRAC-WHITE	Cambodia	Pursat	12.709	104.917	12.3652	103.636	2011	AS-SE-E	S258L/F313S	PH0584-C	M74I/N75E/K76T/A220S/Q271E/N326S/I356T/R371I
721	PH0585-C	1052-PF-TRAC-WHITE	Cambodia	Preah Vihear	12.709	104.917	13.798	105.008	2011	AS-SE-E	S258L/F313S	PH0585-C	M74I/N75D/K76T/A144F/L148I/I194T/A220S/Q271E/T333S
722	PH0586-C	1052-PF-TRAC-WHITE	Cambodia	Preah Vihear	12.709	104.917	13.798	105.008	2011	AS-SE-E	S258L/F313S	PH0586-C	M74I/N75E/K76T/A220S/Q271E/N326S/I356T/R371I
723	PH0587-C	1052-PF-TRAC-WHITE	Cambodia	Preah Vihear	12.709	104.917	13.798	105.008	2011	AS-SE-E	S258L/F313S	PH0587-C	M74I/N75E/K76T/A220S/Q271E/N326S/I356T/R371I
724	PH0589-C	1052-PF-TRAC-WHITE	Cambodia	Preah Vihear	12.709	104.917	13.798	105.008	2011	AS-SE-E	S258L/F313S	PH0589-C	M74I/N75E/K76T/A220S/Q271E/R371I
748	PH0592-C	1052-PF-TRAC-WHITE	Cambodia	Preah Vihear	12.709	104.917	13.798	105.008	2011	AS-SE-E	S258L/F313S	PH0592-C	M74I/N75E/K76T/A220S/Q271E/N326S/I356T/R371I
749	PH0593-C	1052-PF-TRAC-WHITE	Cambodia	Preah Vihear	12.709	104.917	13.798	105.008	2011	AS-SE-E	S258L/F313S	PH0593-C	M74I/N75E/K76T/A220S/Q271E/N326S/I356T/R371I
751	PH0594-C	1052-PF-TRAC-WHITE	Cambodia	Preah Vihear	12.709	104.917	13.798	105.008	2011	AS-SE-E	S258L/F313S	PH0594-C	M74I/N75E/K76T/A220S/Q271E/R371I
752	PH0596-C	1052-PF-TRAC-WHITE	Cambodia	Preah Vihear	12.709	104.917	13.798	105.008	2011	AS-SE-E	S258L/F313S	PH0596-C	M74I/N75E/K76T/A220S/Q271E/N326S/I356T/R371I
753	PH0597-C	1052-PF-TRAC-WHITE	Cambodia	Preah Vihear	12.709	104.917	13.798	105.008	2011	AS-SE-E	S258L/F313S	PH0597-C	M74I/N75D/K76T/A144F/L148I/I194T/A220S/Q271E/T333S
754	PH0598-C	1052-PF-TRAC-WHITE	Cambodia	Preah Vihear	12.709	104.917	13.798	105.008	2011	AS-SE-E	S258L/F313S	PH0598-C	M74I/N75E/K76T/A220S/Q271E/R371I
755	PH0599-C	1052-PF-TRAC-WHITE	Cambodia	Preah Vihear	12.709	104.917	13.798	105.008	2011	AS-SE-E	S258L/F313S	PH0599-C	M74I/N75D/K76T/A144F/L148I/I194T/A220S/Q271E/T333S
756	PH0600-C	1052-PF-TRAC-WHITE	Cambodia	Preah Vihear	12.709	104.917	13.798	105.008	2011	AS-SE-E	S258L/F313S	PH0600-C	M74I/N75D/K76T/A144F/L148I/I194T/A220S/Q271E/T333S
757	PH0601-C	1052-PF-TRAC-WHITE	Cambodia	Preah Vihear	12.709	104.917	13.798	105.008	2011	AS-SE-E	S258L/F313S	PH0601-C	M74I/N75E/K76T/A220S/Q271E/N326S/I356T/R371I
758	PH0602-C	1052-PF-TRAC-WHITE	Cambodia	Preah Vihear	12.709	104.917	13.798	105.008	2011	AS-SE-E	S258L/F313S	PH0602-C	M74I/N75E/K76T/A220S/Q271E/N326S/I356T/R371I
759	PH0603-C	1052-PF-TRAC-WHITE	Cambodia	Preah Vihear	12.709	104.917	13.798	105.008	2011	AS-SE-E	S258L/F313S	PH0603-C	M74I/N75E/K76T/A220S/Q271E/R371I
761	PH0604-C	1052-PF-TRAC-WHITE	Cambodia	Preah Vihear	12.709	104.917	13.798	105.008	2011	AS-SE-E	S258L/F313S	PH0604-C	M74I/N75D/K76T/A144F/L148I/I194T/A220S/Q271E/T333S
762	PH0605-C	1052-PF-TRAC-WHITE	Cambodia	Preah Vihear	12.709	104.917	13.798	105.008	2011	AS-SE-E	S258L/F313S	PH0605-C	M74I/N75E/K76T/A220S/Q271E/N326S/I356T/R371I
764	PH0609-C	1052-PF-TRAC-WHITE	Cambodia	Preah Vihear	12.709	104.917	13.798	105.008	2011	AS-SE-E	S258L/F313S	PH0609-C	M74I/N75E/K76T/A220S/Q271E/R371I
767	PH0610-C	1052-PF-TRAC-WHITE	Cambodia	Preah Vihear	12.709	104.917	13.798	105.008	2011	AS-SE-E	S258L/F313S	PH0610-C	M74I/N75D/K76T/A144F/L148I/I194T/A220S/Q271E/T333S
768	PH0611-C	1052-PF-TRAC-WHITE	Cambodia	Preah Vihear	12.709	104.917	13.798	105.008	2011	AS-SE-E	S258L/F313S	PH0611-C	M74I/N75E/K76T/A220S/Q271E/N326S/I356T/R371I
769	PH0627-C	1052-PF-TRAC-WHITE	Cambodia	Ratanakiri	12.709	104.917	13.7929	107.087	2011	AS-SE-E	S258L/F313S	PH0627-C	M74I/N75E/K76T/A220S/Q271E/R371I
771	PH0632-C	1052-PF-TRAC-WHITE	Cambodia	Ratanakiri	12.709	104.917	13.7929	107.087	2011	AS-SE-E	S258L/F313S	PH0632-C	M74I/N75D/K76T/A144F/L148I/I194T/A220S/Q271E/T333S
772	PH0634-C	1052-PF-TRAC-WHITE	Cambodia	Ratanakiri	12.709	104.917	13.7929	107.087	2011	AS-SE-E	S258L/F313S	PH0634-C	M74I/N75E/K76T/A220S/Q271E/R371I
774	PH0638-C	1052-PF-TRAC-WHITE	Cambodia	Ratanakiri	12.709	104.917	13.7929	107.087	2011	AS-SE-E	S258L/F313S	PH0638-C	M74I/N75E/K76T/A220S/Q271E/R371I
777	PH0640-C	1052-PF-TRAC-WHITE	Cambodia	Ratanakiri	12.709	104.917	13.7929	107.087	2011	AS-SE-E	S258L/F313S	PH0640-C	M74I/N75E/K76T/A220S/Q271E/R371I
778	PH0644-C	1052-PF-TRAC-WHITE	Cambodia	Ratanakiri	12.709	104.917	13.7929	107.087	2011	AS-SE-E	S258L/F313S	PH0644-C	M74I/N75E/K76T/A220S/Q271E/R371I
779	PH0651-C	1052-PF-TRAC-WHITE	Cambodia	Ratanakiri	12.709	104.917	13.7929	107.087	2011	AS-SE-E	S258L/F313S	PH0651-C	M74I/N75E/K76T/A220S/Q271E/R371I
780	PH0677-C	1052-PF-TRAC-WHITE	Cambodia	Pursat	12.709	104.917	12.3652	103.636	2011	AS-SE-E	S258L/F313S	PH0677-C	M74I/N75E/K76T/A220S/Q271E/N326S/I356T/R371I
782	PH0685-C	1052-PF-TRAC-WHITE	Cambodia	Pursat	12.709	104.917	12.3652	103.636	2011	AS-SE-E	S258L/F313S	PH0685-C	M74I/N75E/K76T/A220S/Q271E/N326S/I356T/R371I
784	PH0687-C	1052-PF-TRAC-WHITE	Cambodia	Pursat	12.709	104.917	12.3652	103.636	2011	AS-SE-E	S258L/F313S	PH0687-C	M74I/N75E/K76T/A220S/Q271E/N326S/I356T/R371I
785	PH0696-C	1052-PF-TRAC-WHITE	Cambodia	Pursat	12.709	104.917	12.3652	103.636	2011	AS-SE-E	S258L/F313S	PH0696-C	M74I/N75E/K76T/A220S/Q271E/N326S/I356T/R371I
786	PH0697-C	1052-PF-TRAC-WHITE	Cambodia	Pursat	12.709	104.917	12.3652	103.636	2011	AS-SE-E	S258L/F313S	PH0697-C	M74I/N75E/K76T/A220S/Q271E/N326S/I356T/R371I
788	PH0700-C	1052-PF-TRAC-WHITE	Cambodia	Pursat	12.709	104.917	12.3652	103.636	2011	AS-SE-E	S258L/F313S	PH0700-C	M74I/N75E/K76T/A220S/Q271E/N326S/I356T/R371I
789	PH0707-C	1052-PF-TRAC-WHITE	Cambodia	Pursat	12.709	104.917	12.3652	103.636	2011	AS-SE-E	S258L/F313S	PH0707-C	M74I/N75E/K76T/A220S/Q271E/N326S/I356T/R371I
790	PH0719-C	1052-PF-TRAC-WHITE	Cambodia	Pursat	12.709	104.917	12.3652	103.636	2011	AS-SE-E	S258L/F313S	PH0719-C	M74I/N75E/K76T/A220S/Q271E/N326S/I356T/R371I
792	PH0722-C	1052-PF-TRAC-WHITE	Cambodia	Pursat	12.709	104.917	12.3652	103.636	2011	AS-SE-E	S258L/F313S	PH0722-C	M74I/N75E/K76T/A220S/Q271E/N326S/I356T/R371I
793	PH0728-C	1052-PF-TRAC-WHITE	Cambodia	Preah Vihear	12.709	104.917	13.798	105.008	2011	AS-SE-E	S258L/F313S	PH0728-C	M74I/N75E/K76T/A220S/Q271E/N326S/I356T/R371I
797	PH0731-C	1052-PF-TRAC-WHITE	Cambodia	Preah Vihear	12.709	104.917	13.798	105.008	2011	AS-SE-E	S258L/F313S	PH0731-C	M74I/N75E/K76T/A220S/Q271E/N326S/I356T/R371I
798	PH0732-C	1052-PF-TRAC-WHITE	Cambodia	Preah Vihear	12.709	104.917	13.798	105.008	2011	AS-SE-E	S258L/F313S	PH0732-C	M74I/N75D/K76T/A144F/L148I/I194T/A220S/Q271E/T333S
799	PH0738-C	1052-PF-TRAC-WHITE	Cambodia	Preah Vihear	12.709	104.917	13.798	105.008	2011	AS-SE-E	S258L/F313S	PH0738-C	M74I/N75E/K76T/A220S/Q271E/N326S/I356T/R371I
801	PH0746-C	1052-PF-TRAC-WHITE	Cambodia	Preah Vihear	12.709	104.917	13.798	105.008	2011	AS-SE-E	S258L/F313S	PH0746-C	M74I/N75D/K76T/A144F/L148I/I194T/A220S/Q271E/T333S
802	PH0747-Cx	1052-PF-TRAC-WHITE	Cambodia	Preah Vihear	12.709	104.917	13.798	105.008	2011	AS-SE-E	S258L/F313S	PH0747-Cx	M74I/N75D/K76T/A144F/L148I/I194T/A220S/Q271E/T333S
803	PH0753-Cx	1052-PF-TRAC-WHITE	Cambodia	Preah Vihear	12.709	104.917	13.798	105.008	2011	AS-SE-E	S258L/F313S	PH0753-Cx	M74I/N75E/K76T/A220S/Q271E/N326S/I356T/R371I
804	PH0754-C	1052-PF-TRAC-WHITE	Cambodia	Preah Vihear	12.709	104.917	13.798	105.008	2011	AS-SE-E	S258L/F313S	PH0754-C	M74I/N75D/K76T/A144F/L148I/I194T/A220S/Q271E/T333S
807	PH0755-C	1052-PF-TRAC-WHITE	Cambodia	Preah Vihear	12.709	104.917	13.798	105.008	2011	AS-SE-E	S258L/F313S	PH0755-C	M74I/N75E/K76T/A220S/Q271E/N326S/I356T/R371I
809	PH0757-C	1052-PF-TRAC-WHITE	Cambodia	Preah Vihear	12.709	104.917	13.798	105.008	2011	AS-SE-E	S258L/F313S	PH0757-C	M74I/N75E/K76T/A220S/Q271E/N326S/I356T/R371I
810	PH0761-C	1052-PF-TRAC-WHITE	Cambodia	Preah Vihear	12.709	104.917	13.798	105.008	2011	AS-SE-E	S258L/F313S	PH0761-C	M74I/N75D/K76T/A144F/L148I/I194T/A220S/Q271E/T333S
811	PH0762-Cx	1052-PF-TRAC-WHITE	Cambodia	Preah Vihear	12.709	104.917	13.798	105.008	2011	AS-SE-E	S258L/F313S	PH0762-Cx	M74I/N75E/K76T/A220S/Q271E/N326S/I356T/R371I
813	PH0763-C	1052-PF-TRAC-WHITE	Cambodia	Preah Vihear	12.709	104.917	13.798	105.008	2011	AS-SE-E	S258L/F313S	PH0763-C	M74I/N75E/K76T/A220S/Q271E/N326S/I356T/R371I
814	PH0766-Cx	1052-PF-TRAC-WHITE	Cambodia	Ratanakiri	12.709	104.917	13.7929	107.087	2011	AS-SE-E	S258L/F313S	PH0766-Cx	M74I/N75E/K76T/A220S/Q271E/R371I
815	PH0767-C	1052-PF-TRAC-WHITE	Cambodia	Ratanakiri	12.709	104.917	13.7929	107.087	2011	AS-SE-E	S258L/F313S	PH0767-C	M74I/N75E/K76T/A220S/Q271E/R371I
817	PH0768-C	1052-PF-TRAC-WHITE	Cambodia	Ratanakiri	12.709	104.917	13.7929	107.087	2011	AS-SE-E	S258L/F313S	PH0768-C	M74I/N75E/K76T/A220S/Q271E/R371I
818	PH0769-C	1052-PF-TRAC-WHITE	Cambodia	Ratanakiri	12.709	104.917	13.7929	107.087	2011	AS-SE-E	S258L/F313S	PH0769-C	M74I/N75E/K76T/A220S/Q271E/R371I
819	PH0774-C	1052-PF-TRAC-WHITE	Cambodia	Ratanakiri	12.709	104.917	13.7929	107.087	2011	AS-SE-E	S258L/F313S	PH0774-C	M74I/N75E/K76T/A220S/Q271E/R371I
820	PH0775-Cx	1052-PF-TRAC-WHITE	Cambodia	Ratanakiri	12.709	104.917	13.7929	107.087	2011	AS-SE-E	S258L/F313S	PH0775-Cx	M74I/N75E/K76T/A220S/Q271E/N326S/I356T/R371I
821	PH0779-Cx	1052-PF-TRAC-WHITE	Cambodia	Ratanakiri	12.709	104.917	13.7929	107.087	2011	AS-SE-E	S258L/F313S	PH0779-Cx	M74I/N75D/K76T/A144F/L148I/I194T/A220S/Q271E/T333S
822	PH0780-C	1052-PF-TRAC-WHITE	Cambodia	Ratanakiri	12.709	104.917	13.7929	107.087	2011	AS-SE-E	S258L/F313S	PH0780-C	M74I/N75D/K76T/A144F/L148I/I194T/A220S/Q271E/T333S
824	PH0784-C	1052-PF-TRAC-WHITE	Cambodia	Ratanakiri	12.709	104.917	13.7929	107.087	2011	AS-SE-E	S258L/F313S	PH0784-C	M74I/N75D/K76T/A144F/L148I/I194T/A220S/Q271E/T333S
825	PH0790-C	1052-PF-TRAC-WHITE	Cambodia	Ratanakiri	12.709	104.917	13.7929	107.087	2011	AS-SE-E	S258L/F313S	PH0790-C	M74I/N75E/K76T/A220S/Q271E/R371I
826	PH0818-C	1052-PF-TRAC-WHITE	Cambodia	Pailin	12.709	104.917	12.8784	102.633	2011	AS-SE-E	S258L/F313S	PH0818-C	M74I/N75E/K76T/A220S/Q271E/N326S/I356T/A366T/R371I/R392H
828	PH0819-C	1052-PF-TRAC-WHITE	Cambodia	Pailin	12.709	104.917	12.8784	102.633	2011	AS-SE-E	S258L/F313S	PH0819-C	M74I/N75E/K76T/H97Y/A220S/Q271E/N326S/I356T/R371I
829	PH0820-C	1052-PF-TRAC-WHITE	Cambodia	Pailin	12.709	104.917	12.8784	102.633	2011	AS-SE-E	S258L/F313S	PH0820-C	M74I/N75E/K76T/H97Y/A220S/Q271E/N326S/I356T/R371I
830	PH0821-C	1052-PF-TRAC-WHITE	Cambodia	Pailin	12.709	104.917	12.8784	102.633	2011	AS-SE-E	S258L/F313S	PH0821-C	M74I/N75E/K76T/H97Y/A220S/Q271E/N326S/I356T/R371I
831	PH0823-C	1052-PF-TRAC-WHITE	Cambodia	Pailin	12.709	104.917	12.8784	102.633	2011	AS-SE-E	S258L/F313S	PH0823-C	M74I/N75E/K76T/H97Y/A220S/Q271E/N326S/I356T/R371I
832	PH0826-C	1052-PF-TRAC-WHITE	Cambodia	Pailin	12.709	104.917	12.8784	102.633	2011	AS-SE-E	S258L/F313S	PH0826-C	M74I/N75E/K76T/A220S/Q271E/N326S/I356T/R371I
834	PH0828-C	1052-PF-TRAC-WHITE	Cambodia	Pailin	12.709	104.917	12.8784	102.633	2011	AS-SE-E	S258L/F313S	PH0828-C	M74I/N75E/K76T/H97Y/A220S/Q271E/N326S/I356T/R371I
835	PH0830-C	1052-PF-TRAC-WHITE	Cambodia	Pailin	12.709	104.917	12.8784	102.633	2011	AS-SE-E	S258L/F313S	PH0830-C	M74I/N75E/K76T/A220S/Q271E/N326S/G353V/I356T/R371I
836	PH0831-C	1052-PF-TRAC-WHITE	Cambodia	Pailin	12.709	104.917	12.8784	102.633	2011	AS-SE-E	S258L/F313S	PH0831-C	M74I/N75E/K76T/A220S/Q271E/N326S/I356T/R371I
837	PH0832-C	1052-PF-TRAC-WHITE	Cambodia	Pailin	12.709	104.917	12.8784	102.633	2011	AS-SE-E	S258L/F313S	PH0832-C	M74I/N75E/K76T/A220S/Q271E/N326S/I356T/R371I
839	PH0833-C	1052-PF-TRAC-WHITE	Cambodia	Pailin	12.709	104.917	12.8784	102.633	2011	AS-SE-E	S258L/F313S	PH0833-C	M74I/N75E/K76T/A220S/Q271E/N326S/I356T/R371I
840	PH0834-C	1052-PF-TRAC-WHITE	Cambodia	Pailin	12.709	104.917	12.8784	102.633	2011	AS-SE-E	S258L/F313S	PH0834-C	M74I/N75E/K76T/A220S/Q271E/N326S/I356T/R371I
841	PH0836-C	1052-PF-TRAC-WHITE	Cambodia	Pailin	12.709	104.917	12.8784	102.633	2011	AS-SE-E	S258L/F313S	PH0836-C	M74I/N75E/K76T/A220S/Q271E/N326S/I356T/R371I
842	PH0837-C	1052-PF-TRAC-WHITE	Cambodia	Pailin	12.709	104.917	12.8784	102.633	2011	AS-SE-E	S258L/F313S	PH0837-C	M74I/N75E/K76T/A220S/Q271E/N326S/I356T/R371I
843	PH0838-C	1052-PF-TRAC-WHITE	Cambodia	Pailin	12.709	104.917	12.8784	102.633	2011	AS-SE-E	S258L/F313S	PH0838-C	M74I/N75E/K76T/A220S/Q271E/N326S/I356T/R371I
1791	PH0839-C	1052-PF-TRAC-WHITE	Cambodia	Pailin	12.709	104.917	12.8784	102.633	2011	AS-SE-E	S258L/F313S	PH0839-C	M74I/N75E/K76T/H97Y/A220S/Q271E/N326S/I356T/R371I
1792	PH0840-C	1052-PF-TRAC-WHITE	Cambodia	Pailin	12.709	104.917	12.8784	102.633	2011	AS-SE-E	S258L/F313S	PH0840-C	M74I/N75E/K76T/H97Y/A220S/Q271E/N326S/I356T/R371I
1806	PH0842-C	1052-PF-TRAC-WHITE	Cambodia	Pailin	12.709	104.917	12.8784	102.633	2011	AS-SE-E	S258L/F313S	PH0842-C	M74I/N75E/K76T/A220S/Q271E/N326S/I356T/R371I
1807	PH0843-C	1052-PF-TRAC-WHITE	Cambodia	Pailin	12.709	104.917	12.8784	102.633	2011	AS-SE-E	S258L/F313S	PH0843-C	M74I/N75E/K76T/A220S/Q271E/N326S/I356T/R371I
1809	PH0847-C	1052-PF-TRAC-WHITE	Cambodia	Pailin	12.709	104.917	12.8784	102.633	2011	AS-SE-E	S258L/F313S	PH0847-C	M74I/N75E/K76T/A220S/Q271E/N326S/I356T/R371I
1810	PH0848-C	1052-PF-TRAC-WHITE	Cambodia	Pailin	12.709	104.917	12.8784	102.633	2011	AS-SE-E	S258L/F313S	PH0848-C	M74I/N75E/K76T/A220S/Q271E/R371I
1811	PH0850-C	1052-PF-TRAC-WHITE	Cambodia	Pailin	12.709	104.917	12.8784	102.633	2011	AS-SE-E	S258L/F313S	PH0850-C	M74I/N75E/K76T/A220S/Q271E/N326S/I356T/R371I
1812	PH0852-C	1052-PF-TRAC-WHITE	Cambodia	Pailin	12.709	104.917	12.8784	102.633	2011	AS-SE-E	S258L/F313S	PH0852-C	M74I/N75E/K76T/A220S/Q271E/N326S/I356T/R371I
1813	PH0853-C	1052-PF-TRAC-WHITE	Cambodia	Pailin	12.709	104.917	12.8784	102.633	2011	AS-SE-E	S258L/F313S	PH0853-C	M74I/N75E/K76T/A220S/Q271E/N326S/I356T/R371I
1814	PH0854-C	1052-PF-TRAC-WHITE	Cambodia	Pailin	12.709	104.917	12.8784	102.633	2011	AS-SE-E	S258L/F313S	PH0854-C	M74I/N75E/K76T/A220S/Q271E/N326S/I356T/R371I
1815	PH0855-C	1052-PF-TRAC-WHITE	Cambodia	Pailin	12.709	104.917	12.8784	102.633	2011	AS-SE-E	S258L/F313S	PH0855-C	M74I/N75E/K76T/A220S/Q271E/N326S/I356T/R371I
1816	PH0856-C	1052-PF-TRAC-WHITE	Cambodia	Pailin	12.709	104.917	12.8784	102.633	2011	AS-SE-E	S258L/F313S	PH0856-C	M74I/N75E/K76T/A220S/Q271E/N326S/I356T/R371I
1817	PH0858-C	1052-PF-TRAC-WHITE	Cambodia	Pailin	12.709	104.917	12.8784	102.633	2011	AS-SE-E	S258L/F313S	PH0858-C	M74I/N75E/K76T/A220S/Q271E/N326S/I356T/R371I
1818	PH0886-C	1052-PF-TRAC-WHITE	Cambodia	Pailin	12.709	104.917	12.8784	102.633	2011	AS-SE-E	S258L/F313S	PH0886-C	M74I/N75E/K76T/A220S/Q271E/N326S/I356T/R371I
1824	PH0887-C	1052-PF-TRAC-WHITE	Cambodia	Pailin	12.709	104.917	12.8784	102.633	2011	AS-SE-E	S258L/F313S	PH0887-C	M74I/N75E/K76T/A220S/Q271E/N326S/I356T/R371I
1829	PH0888-C	1052-PF-TRAC-WHITE	Cambodia	Pailin	12.709	104.917	12.8784	102.633	2011	AS-SE-E	S258L/F313S	PH0888-C	M74I/N75E/K76T/A220S/Q271E/N326S/I356T/R371I
1830	PH0889-C	1052-PF-TRAC-WHITE	Cambodia	Pailin	12.709	104.917	12.8784	102.633	2011	AS-SE-E	S258L/F313S	PH0889-C	M74I/N75E/K76T/A220S/Q271E/N326S/I356T/R371I
1831	PH0890-C	1052-PF-TRAC-WHITE	Cambodia	Pailin	12.709	104.917	12.8784	102.633	2011	AS-SE-E	S258L/F313S	PH0890-C	M74I/N75E/K76T/A220S/Q271E/N326S/I356T/R371I
1864	PH0891-Cx	1052-PF-TRAC-WHITE	Cambodia	Pailin	12.709	104.917	12.8784	102.633	2011	AS-SE-E	S258L/F313S	PH0891-Cx	M74I/N75E/K76T/A220S/Q271E/N326S/I356T/R371I
1865	PH1136-C	1052-PF-TRAC-WHITE	Cambodia	Pailin	12.709	104.917	12.8784	102.633	2011	AS-SE-E	S258L/F313S	PH1136-C	M74I/N75E/K76T/A220S/Q271E/N326S/I356T/R371I
1949	PH0865-C	1052-PF-TRAC-WHITE	Cambodia	Preah Vihear	12.709	104.917	13.798	105.008	2012	AS-SE-E	S258L/F313S	PH0865-C	M74I/N75E/K76T/A220S/Q271E/R371I
1950	PH0866-C	1052-PF-TRAC-WHITE	Cambodia	Preah Vihear	12.709	104.917	13.798	105.008	2012	AS-SE-E	S258L/F313S	PH0866-C	M74I/N75E/K76T/A220S/Q271E/R371I
1953	PH0871-C	1052-PF-TRAC-WHITE	Cambodia	Preah Vihear	12.709	104.917	13.798	105.008	2012	AS-SE-E	S258L/F313S	PH0871-C	M74I/N75E/K76T/A220S/Q271E/N326S/I356T/R371I
1956	PH0872-C	1052-PF-TRAC-WHITE	Cambodia	Preah Vihear	12.709	104.917	13.798	105.008	2012	AS-SE-E	S258L/F313S	PH0872-C	M74I/N75E/K76T/A220S/Q271E/R371I
1957	PH0873-Cx	1052-PF-TRAC-WHITE	Cambodia	Preah Vihear	12.709	104.917	13.798	105.008	2012	AS-SE-E	S258L/F313S	PH0873-Cx	M74I/N75E/K76T/A220S/Q271E/N326S/I356T/R371I
2903	PH0876-C	1052-PF-TRAC-WHITE	Cambodia	Preah Vihear	12.709	104.917	13.798	105.008	2012	AS-SE-E	S258L/F313S	PH0876-C	M74I/N75E/K76T/A220S/Q271E/R371I
644	PH0885-Cx	1052-PF-TRAC-WHITE	Cambodia	Ratanakiri	12.709	104.917	13.7929	107.087	2012	AS-SE-E	S258L/F313S	PH0885-Cx	M74I/N75E/K76T/A220S/Q271E/R371I
844	PH0894-C	1052-PF-TRAC-WHITE	Cambodia	Pailin	12.709	104.917	12.8784	102.633	2012	AS-SE-E	S258L/F313S	PH0894-C	M74I/N75E/K76T/A220S/Q271E/N326S/I356T/R371I
846	PH0896-C	1052-PF-TRAC-WHITE	Cambodia	Pailin	12.709	104.917	12.8784	102.633	2012	AS-SE-E	S258L/F313S	PH0896-C	M74I/N75E/K76T/A220S/Q271E/N326S/I356T/R371I
847	PH0898-C	1052-PF-TRAC-WHITE	Cambodia	Pailin	12.709	104.917	12.8784	102.633	2012	AS-SE-E	S258L/F313S	PH0898-C	M74I/N75E/K76T/A220S/Q271E/N326S/I356T/R371I
848	PH0899-C	1052-PF-TRAC-WHITE	Cambodia	Pailin	12.709	104.917	12.8784	102.633	2012	AS-SE-E	S258L/F313S	PH0899-C	M74I/N75E/K76T/A220S/Q271E/N326S/I356T/R371I
851	PH0900-C	1052-PF-TRAC-WHITE	Cambodia	Pailin	12.709	104.917	12.8784	102.633	2012	AS-SE-E	S258L/F313S	PH0900-C	M74I/N75E/K76T/A220S/Q271E/N326S/I356T/R371I
1793	PH0901-C	1052-PF-TRAC-WHITE	Cambodia	Pailin	12.709	104.917	12.8784	102.633	2012	AS-SE-E	S258L/F313S	PH0901-C	M74I/N75E/K76T/A220S/Q271E/N326S/I356T/R371I
1794	PH0904-C	1052-PF-TRAC-WHITE	Cambodia	Pailin	12.709	104.917	12.8784	102.633	2012	AS-SE-E	S258L/F313S	PH0904-C	M74I/N75E/K76T/A220S/Q271E/N326S/I356T/R371I
1796	PH0905-C	1052-PF-TRAC-WHITE	Cambodia	Pailin	12.709	104.917	12.8784	102.633	2012	AS-SE-E	S258L/F313S	PH0905-C	M74I/N75E/K76T/A220S/Q271E/N326S/I356T/R371I
1797	PH0906-C	1052-PF-TRAC-WHITE	Cambodia	Pailin	12.709	104.917	12.8784	102.633	2012	AS-SE-E	S258L/F313S	PH0906-C	M74I/N75E/K76T/A220S/Q271E/N326S/M343L/I356T/R371I
1799	PH0907-C	1052-PF-TRAC-WHITE	Cambodia	Pailin	12.709	104.917	12.8784	102.633	2012	AS-SE-E	S258L/F313S	PH0907-C	M74I/N75E/K76T/A220S/Q271E/N326S/I356T/R371I
1800	PH0908-C	1052-PF-TRAC-WHITE	Cambodia	Pailin	12.709	104.917	12.8784	102.633	2012	AS-SE-E	S258L/F313S	PH0908-C	M74I/N75E/K76T/A220S/Q271E/N326S/I356T/R371I
1801	PH0910-C	1052-PF-TRAC-WHITE	Cambodia	Pailin	12.709	104.917	12.8784	102.633	2012	AS-SE-E	S258L/F313S	PH0910-C	M74I/N75E/K76T/A220S/Q271E/N326S/I356T/R371I
1802	PH0912-C	1052-PF-TRAC-WHITE	Cambodia	Pailin	12.709	104.917	12.8784	102.633	2012	AS-SE-E	S258L/F313S	PH0912-C	M74I/N75E/K76T/A220S/Q271E/N326S/M343L/I356T/R371I
1803	PH0915-C	1052-PF-TRAC-WHITE	Cambodia	Pailin	12.709	104.917	12.8784	102.633	2012	AS-SE-E	S258L/F313S	PH0915-C	M74I/N75E/K76T/A220S/Q271E/N326S/I356T/R371I
1804	PH0916-C	1052-PF-TRAC-WHITE	Cambodia	Pailin	12.709	104.917	12.8784	102.633	2012	AS-SE-E	S258L/F313S	PH0916-C	M74I/N75E/K76T/A220S/Q271E/N326S/I356T/R371I
1805	PH0920-Cx	1052-PF-TRAC-WHITE	Cambodia	Pursat	12.709	104.917	12.3652	103.636	2012	AS-SE-E	S258L/F313S	PH0920-Cx	M74I/N75E/K76T/A220S/Q271E/N326S/G353V/I356T/R371I
1819	PH0924-C	1052-PF-TRAC-WHITE	Cambodia	Preah Vihear	12.709	104.917	13.798	105.008	2012	AS-SE-E	S258L/F313S	PH0924-C	M74I/N75E/K76T/A220S/Q271E/R371I
1822	PH0925-C	1052-PF-TRAC-WHITE	Cambodia	Preah Vihear	12.709	104.917	13.798	105.008	2012	AS-SE-E	S258L/F313S	PH0925-C	M74I/N75D/K76T/A144F/L148I/I194T/A220S/Q271E/T333S
1825	PH0926-C	1052-PF-TRAC-WHITE	Cambodia	Preah Vihear	12.709	104.917	13.798	105.008	2012	AS-SE-E	S258L/F313S	PH0926-C	M74I/N75E/K76T/A220S/Q271E/N326S/I356T/R371I
1826	PH0927-C	1052-PF-TRAC-WHITE	Cambodia	Preah Vihear	12.709	104.917	13.798	105.008	2012	AS-SE-E	S258L/F313S	PH0927-C	M74I/N75E/K76T/A220S/Q271E/R371I
1828	PH0928-C	1052-PF-TRAC-WHITE	Cambodia	Preah Vihear	12.709	104.917	13.798	105.008	2012	AS-SE-E	S258L/F313S	PH0928-C	M74I/N75D/K76T/A144F/L148I/I194T/A220S/Q271E/T333S
1832	PH0929-C	1052-PF-TRAC-WHITE	Cambodia	Preah Vihear	12.709	104.917	13.798	105.008	2012	AS-SE-E	S258L/F313S	PH0929-C	M74I/N75E/K76T/A220S/Q271E/R371I
1833	PH0931-C	1052-PF-TRAC-WHITE	Cambodia	Preah Vihear	12.709	104.917	13.798	105.008	2012	AS-SE-E	S258L/F313S	PH0931-C	M74I/N75E/K76T/A220S/Q271E/R371I
1943	PH0932-C	1052-PF-TRAC-WHITE	Cambodia	Preah Vihear	12.709	104.917	13.798	105.008	2012	AS-SE-E	S258L/F313S	PH0932-C	M74I/N75E/K76T/A220S/Q271E/R371I
1944	PH0933-C	1052-PF-TRAC-WHITE	Cambodia	Ratanakiri	12.709	104.917	13.7929	107.087	2012	AS-SE-E	S258L/F313S	PH0933-C	M74I/N75D/K76T/A144F/L148I/I194T/A220S/Q271E/T333S
1945	PH0936-C	1052-PF-TRAC-WHITE	Cambodia	Ratanakiri	12.709	104.917	13.7929	107.087	2012	AS-SE-E	S258L/F313S	PH0936-C	M74I/N75E/K76T/A220S/Q271E/R371I
1946	PH0945-C	1044-PF-KH-FAIRHURST	Cambodia	Pursat	12.709	104.917	12.3652	103.636	2012	AS-SE-E	S258L/F313S	PH0945-C	M74I/N75E/K76T/A220S/Q271E/R371I
1948	PH0961-Cx	1044-PF-KH-FAIRHURST	Cambodia	Pursat	12.709	104.917	12.3652	103.636	2012	AS-SE-E	S258L/F313S	PH0961-Cx	M74I/N75E/K76T/A220S/Q271E/N326S/I356T/G367C/R371I
1951	PH0964-Cx	1044-PF-KH-FAIRHURST	Cambodia	Pursat	12.709	104.917	12.3652	103.636	2012	AS-SE-E	S258L/F313S	PH0964-Cx	M74I/N75E/K76T/H97L/A220S/Q271E/N326S/I356T/R371I
1952	PH0966-Cx	1044-PF-KH-FAIRHURST	Cambodia	Pursat	12.709	104.917	12.3652	103.636	2012	AS-SE-E	S258L/F313S	PH0966-Cx	M74I/N75E/K76T/A220S/Q271E/N326S/I356T/R371I
1954	PH0979-C	1052-PF-TRAC-WHITE	Cambodia	Preah Vihear	12.709	104.917	13.798	105.008	2012	AS-SE-E	S258L/F313S	PH0979-C	M74I/N75D/K76T/A144F/L148I/I194T/A220S/Q271E/T333S
1955	PH0983-C	1052-PF-TRAC-WHITE	Cambodia	Preah Vihear	12.709	104.917	13.798	105.008	2012	AS-SE-E	S258L/F313S	PH0983-C	M74I/N75E/K76T/A220S/Q271E/R371I
1990	PH0984-C	1052-PF-TRAC-WHITE	Cambodia	Preah Vihear	12.709	104.917	13.798	105.008	2012	AS-SE-E	S258L/F313S	PH0984-C	M74I/N75D/K76T/A144F/L148I/I194T/A220S/Q271E/T333S
1991	PH0985-C	1052-PF-TRAC-WHITE	Cambodia	Preah Vihear	12.709	104.917	13.798	105.008	2012	AS-SE-E	S258L/F313S	PH0985-C	M74I/N75E/K76T/A220S/Q271E/N326S/I356T/R371I
1992	PH0986-C	1052-PF-TRAC-WHITE	Cambodia	Pailin	12.709	104.917	12.8784	102.633	2012	AS-SE-E	S258L/F313S	PH0986-C	M74I/N75E/K76T/A220S/Q271E/N326S/I356T/R371I
1993	PH0987-C	1052-PF-TRAC-WHITE	Cambodia	Pailin	12.709	104.917	12.8784	102.633	2012	AS-SE-E	S258L/F313S	PH0987-C	M74I/N75E/K76T/A220S/Q271E/N326S/I356T/R371I
2807	PH0991-C	1052-PF-TRAC-WHITE	Cambodia	Pailin	12.709	104.917	12.8784	102.633	2012	AS-SE-E	S258L/F313S	PH0991-C	M74I/N75E/K76T/A220S/Q271E/N326S/I356T/R371I
2820	PH1000-C	1052-PF-TRAC-WHITE	Cambodia	Pailin	12.709	104.917	12.8784	102.633	2012	AS-SE-E	S258L/F313S	PH1000-C	M74I/N75D/K76T/A144F/L148I/I194T/A220S/Q271E/T333S
2821	PH1001-C	1052-PF-TRAC-WHITE	Cambodia	Pailin	12.709	104.917	12.8784	102.633	2012	AS-SE-E	S258L/F313S	PH1001-C	M74I/N75E/K76T/A220S/Q271E/N326S/I356T/R371I
2913	PH1002-C	1052-PF-TRAC-WHITE	Cambodia	Pailin	12.709	104.917	12.8784	102.633	2012	AS-SE-E	S258L/F313S	PH1002-C	M74I/N75E/K76T/A220S/Q271E/N326S/I356T/R371I
645	PH1032-C	1044-PF-KH-FAIRHURST	Cambodia	Preah Vihear	12.709	104.917	13.798	105.008	2012	AS-SE-E	S258L/F313S	PH1032-C	M74I/N75D/K76T/A144F/L148I/I194T/A220S/Q271E/T333S
647	PH1037-C	1044-PF-KH-FAIRHURST	Cambodia	Preah Vihear	12.709	104.917	13.798	105.008	2012	AS-SE-E	S258L/F313S	PH1037-C	M74I/N75E/K76T/A220S/Q271E/N326S/I356T/R371I
650	PH1043-C	1044-PF-KH-FAIRHURST	Cambodia	Preah Vihear	12.709	104.917	13.798	105.008	2012	AS-SE-E	S258L/F313S	PH1043-C	M74I/N75E/K76T/A220S/Q271E/R371I
651	PH1045-C	1044-PF-KH-FAIRHURST	Cambodia	Preah Vihear	12.709	104.917	13.798	105.008	2012	AS-SE-E	S258L/F313S	PH1045-C	M74I/N75E/K76T/A220S/Q271E/N326S/I356T/R371I
726	PH1051-C	1044-PF-KH-FAIRHURST	Cambodia	Preah Vihear	12.709	104.917	13.798	105.008	2012	AS-SE-E	S258L/F313S	PH1051-C	M74I/N75E/K76T/A220S/Q271E/N326S/I356T/R371I
852	PH1069-C	1044-PF-KH-FAIRHURST	Cambodia	Ratanakiri	12.709	104.917	13.7929	107.087	2012	AS-SE-E	S258L/F313S	PH1069-C	M74I/N75E/K76T/A220S/Q271E/R371I
853	PH1086-C	1044-PF-KH-FAIRHURST	Cambodia	Pursat	12.709	104.917	12.3652	103.636	2012	AS-SE-E	S258L/F313S	PH1086-C	M74I/N75E/K76T/H97L/A220S/Q271E/N326S/I356T/R371I
854	PH1089-C	1044-PF-KH-FAIRHURST	Cambodia	Pursat	12.709	104.917	12.3652	103.636	2012	AS-SE-E	S258L/F313S	PH1089-C	M74I/N75E/K76T/A220S/Q271E/N326S/I356T/R371I
855	PH1097-C	1044-PF-KH-FAIRHURST	Cambodia	Preah Vihear	12.709	104.917	13.798	105.008	2012	AS-SE-E	S258L/F313S	PH1097-C	M74I/N75E/K76T/A220S/Q271E/N326S/I356T/R371I
1837	PH1357-C	1044-PF-KH-FAIRHURST	Cambodia	Pursat	12.709	104.917	12.3652	103.636	2012	AS-SE-E	S258L/F313S	PH1357-C	M74I/N75E/K76T/A220S/Q271E/N326S/I356T/G367C/R371I
1840	PH1360-C	1044-PF-KH-FAIRHURST	Cambodia	Pursat	12.709	104.917	12.3652	103.636	2012	AS-SE-E	S258L/F313S	PH1360-C	M74I/N75E/K76T/A220S/Q271E/N326S/I356T/R371I
1841	PH1147-C	1044-PF-KH-FAIRHURST	Cambodia	Preah Vihear	12.709	104.917	13.798	105.008	2013	AS-SE-E	S258L/F313S	PH1147-C	M74I/N75E/K76T/A220S/Q271E/R371I
1843	PH1148-C	1044-PF-KH-FAIRHURST	Cambodia	Preah Vihear	12.709	104.917	13.798	105.008	2013	AS-SE-E	S258L/F313S	PH1148-C	M74I/N75E/K76T/A220S/Q271E/N326S/I356T/R371I
1844	PH1163-C	1044-PF-KH-FAIRHURST	Cambodia	Preah Vihear	12.709	104.917	13.798	105.008	2013	AS-SE-E	S258L/F313S	PH1163-C	M74I/N75E/K76T/A220S/Q271E/R371I
1846	PH1164-C	1044-PF-KH-FAIRHURST	Cambodia	Preah Vihear	12.709	104.917	13.798	105.008	2013	AS-SE-E	S258L/F313S	PH1164-C	M74I/N75E/K76T/A220S/Q271E/R371I
1847	PH1168-C	1044-PF-KH-FAIRHURST	Cambodia	Preah Vihear	12.709	104.917	13.798	105.008	2013	AS-SE-E	S258L/F313S	PH1168-C	M74I/N75E/K76T/A220S/Q271E/R371I
1852	PH1170-C	1044-PF-KH-FAIRHURST	Cambodia	Preah Vihear	12.709	104.917	13.798	105.008	2013	AS-SE-E	S258L/F313S	PH1170-C	M74I/N75D/K76T/A144F/L148I/I194T/A220S/Q271E/T333S
1855	PH1195-C	1044-PF-KH-FAIRHURST	Cambodia	Pursat	12.709	104.917	12.3652	103.636	2013	AS-SE-E	S258L/F313S	PH1195-C	M74I/N75E/K76T/A220S/Q271E/N326S/I356T/R371I
1857	PH1224-C	1044-PF-KH-FAIRHURST	Cambodia	Pursat	12.709	104.917	12.3652	103.636	2013	AS-SE-E	S258L/F313S	PH1224-C	M74I/N75E/K76T/A220S/Q271E/N326S/I356T/A366T/R371I
1858	PH1251-C	1044-PF-KH-FAIRHURST	Cambodia	Pursat	12.709	104.917	12.3652	103.636	2013	AS-SE-E	S258L/F313S	PH1251-C	M74I/N75E/K76T/A220S/Q271E/N326S/I356T/R371I
1859	PH1252-C	1044-PF-KH-FAIRHURST	Cambodia	Pursat	12.709	104.917	12.3652	103.636	2013	AS-SE-E	S258L/F313S	PH1252-C	M74I/N75E/K76T/A220S/Q271E/N326S/I356T/R371I
1866	PH1253-C	1044-PF-KH-FAIRHURST	Cambodia	Pursat	12.709	104.917	12.3652	103.636	2013	AS-SE-E	S258L/F313S	PH1253-C	M74I/N75E/K76T/H97L/A220S/Q271E/N326S/I356T/R371I
1868	PH1339-C	1044-PF-KH-FAIRHURST	Cambodia	Pursat	12.709	104.917	12.3652	103.636	2013	AS-SE-E	S258L/F313S	PH1339-C	M74I/N75E/K76T/A220S/Q271E/N326S/I356T/A366T/R371I
1869	PH1341-C	1044-PF-KH-FAIRHURST	Cambodia	Pursat	12.709	104.917	12.3652	103.636	2013	AS-SE-E	S258L/F313S	PH1341-C	M74I/N75E/K76T/A220S/Q271E/N326S/I356T/A366T/R371I
1870	PH1373-C	1044-PF-KH-FAIRHURST	Cambodia	Pursat	12.709	104.917	12.3652	103.636	2013	AS-SE-E	S258L/F313S	PH1373-C	M74I/N75E/K76T/A220S/Q271E/N326S/I356T/V370E/R371I
1871	PH1391-C	1044-PF-KH-FAIRHURST	Cambodia	Pursat	12.709	104.917	12.3652	103.636	2014	AS-SE-E	S258L/F313S	PH1391-C	M74I/N75E/K76T/A220S/Q271E/N326S/I356T/G367C/R371I
1873	PH1398-C	1044-PF-KH-FAIRHURST	Cambodia	Pursat	12.709	104.917	12.3652	103.636	2014	AS-SE-E	S258L/F313S	PH1398-C	M74I/N75E/K76T/H97Y/A220S/Q271E/N326S/I356T/R371I
1875	PH1407-C	1044-PF-KH-FAIRHURST	Cambodia	Pursat	12.709	104.917	12.3652	103.636	2014	AS-SE-E	S258L/F313S	PH1407-C	M74I/N75E/K76T/H97Y/A220S/Q271E/N326S/I356T/R371I
1876	PH1562-C	1044-PF-KH-FAIRHURST	Cambodia	Preah Vihear	12.709	104.917	13.798	105.008	2014	AS-SE-E	S258L/F313S	PH1562-C	M74I/N75E/K76T/A220S/Q271E/N326S/I356T/R371I
1877	PH1566-C	1044-PF-KH-FAIRHURST	Cambodia	Preah Vihear	12.709	104.917	13.798	105.008	2014	AS-SE-E	S258L/F313S	PH1566-C	M74I/N75D/K76T/A144F/L148I/I194T/A220S/Q271E/T333S
1878	PH1589-C	1044-PF-KH-FAIRHURST	Cambodia	Ratanakiri	12.709	104.917	13.7929	107.087	2014	AS-SE-E	S258L/F313S	PH1589-C	M74I/N75E/K76T/A220S/Q271E/R371I
1880	PH1594-C	1044-PF-KH-FAIRHURST	Cambodia	Ratanakiri	12.709	104.917	13.7929	107.087	2014	AS-SE-E	S258L/F313S	PH1594-C	M74I/N75E/K76T/A220S/Q271E/R371I
1881	PH1596-C	1044-PF-KH-FAIRHURST	Cambodia	Ratanakiri	12.709	104.917	13.7929	107.087	2014	AS-SE-E	S258L/F313S	PH1596-C	M74I/N75E/K76T/A220S/Q271E/R371I
1883	PH1597-C	1044-PF-KH-FAIRHURST	Cambodia	Ratanakiri	12.709	104.917	13.7929	107.087	2014	AS-SE-E	S258L/F313S	PH1597-C	M74I/N75E/K76T/A220S/Q271E/R371I
1884	PH1611-C	1044-PF-KH-FAIRHURST	Cambodia	Ratanakiri	12.709	104.917	13.7929	107.087	2014	AS-SE-E	S258L/F313S	PH1611-C	M74I/N75E/K76T/A220S/Q271E/R371I
1885	PH1614-C	1044-PF-KH-FAIRHURST	Cambodia	Ratanakiri	12.709	104.917	13.7929	107.087	2014	AS-SE-E	S258L/F313S	PH1614-C	M74I/N75D/K76T/A144F/L148I/I194T/A220S/Q271E/T333S
1889	PH1624-C	1044-PF-KH-FAIRHURST	Cambodia	Ratanakiri	12.709	104.917	13.7929	107.087	2014	AS-SE-E	S258L/F313S	PH1624-C	M74I/N75E/K76T/A220S/Q271E/R371I
1892	PH1626-C	1044-PF-KH-FAIRHURST	Cambodia	Ratanakiri	12.709	104.917	13.7929	107.087	2014	AS-SE-E	S258L/F313S	PH1626-C	M74I/N75E/K76T/A220S/Q271E/R371I
1894	PH1634-C	1044-PF-KH-FAIRHURST	Cambodia	Ratanakiri	12.709	104.917	13.7929	107.087	2014	AS-SE-E	S258L/F313S	PH1634-C	M74I/N75E/K76T/A220S/Q271E/R371I
1896	PH1636-C	1044-PF-KH-FAIRHURST	Cambodia	Ratanakiri	12.709	104.917	13.7929	107.087	2014	AS-SE-E	S258L/F313S	PH1636-C	M74I/N75E/K76T/A220S/Q271E/R371I
1898	PH1639-C	1044-PF-KH-FAIRHURST	Cambodia	Ratanakiri	12.709	104.917	13.7929	107.087	2014	AS-SE-E	S258L/F313S	PH1639-C	M74I/N75E/K76T/A220S/Q271E/R371I
1901	PH1643-C	1044-PF-KH-FAIRHURST	Cambodia	Ratanakiri	12.709	104.917	13.7929	107.087	2014	AS-SE-E	S258L/F313S	PH1643-C	M74I/N75E/K76T/A220S/Q271E/R371I
1902	PH1490-C	1044-PF-KH-FAIRHURST	Cambodia	Pursat	12.709	104.917	12.3652	103.636	2015	AS-SE-E	S258L/F313S	PH1490-C	M74I/N75E/K76T/A220S/Q271E/N326S/I356T/R371I
1904	PH1495-C	1044-PF-KH-FAIRHURST	Cambodia	Pursat	12.709	104.917	12.3652	103.636	2015	AS-SE-E	S258L/F313S	PH1495-C	M74I/N75E/K76T/H97Y/A220S/Q271E/N326S/I356T/R371I
1907	PH1504-C	1044-PF-KH-FAIRHURST	Cambodia	Pursat	12.709	104.917	12.3652	103.636	2015	AS-SE-E	S258L/F313S	PH1504-C	M74I/N75E/K76T/A220S/Q271E/N326S/I356T/R371I
1908	PH1570-C	1044-PF-KH-FAIRHURST	Cambodia	Preah Vihear	12.709	104.917	13.798	105.008	2015	AS-SE-E	S258L/F313S	PH1570-C	M74I/N75E/K76T/A220S/Q271E/N326S/I356T/R371I
1909	RCN07827	1195-PF-TRAC2-DONDORP	Cambodia	Pursat	12.709	104.917	12.3652	103.636	2016	AS-SE-E	S258L/F313S	RCN07827	M74I/N75E/K76T/A220S/Q271E/N326S/M343I/I356T/R371I
1915	RCN07829	1195-PF-TRAC2-DONDORP	Cambodia	Preah Vihear	12.709	104.917	13.798	105.008	2016	AS-SE-E	S258L/F313S	RCN07829	M74I/N75E/K76T/T93S/A220S/Q271E/N326S/I356T/R371I
1919	RCN07851	1195-PF-TRAC2-DONDORP	Cambodia	Ratanakiri	12.709	104.917	13.7929	107.087	2016	AS-SE-E	S258L/F313S	RCN07851	M74I/N75D/K76T/A144F/L148I/I194T/A220S/Q271E/T333S
1924	RCN08033	1195-PF-TRAC2-DONDORP	Cambodia	Pailin	12.709	104.917	12.8784	102.633	2016	AS-SE-E	S258L/F313S	RCN08033	M74I/N75E/K76T/A220S/Q271E/N326S/M343I/I356T/R371I
1933	RCN08624	1207-PF-KH-CNM-GENRE	Cambodia	Ratanakiri	12.709	104.917	13.7929	107.087	2016	AS-SE-E	S258L/F313S	RCN08624	M74I/N75D/K76T/A144F/L148I/I194T/A220S/Q271E/T333S
1935	RCN08640	1207-PF-KH-CNM-GENRE	Cambodia	Ratanakiri	12.709	104.917	13.7929	107.087	2016	AS-SE-E	S258L/F313S	RCN08640	M74I/N75D/K76T/A144F/L148I/I194T/A220S/Q271E/T333S
1937	RCN08646	1207-PF-KH-CNM-GENRE	Cambodia	Ratanakiri	12.709	104.917	13.7929	107.087	2016	AS-SE-E	S258L/F313S	RCN08646	M74I/N75D/K76T/A144F/L148I/I194T/A220S/Q271E/T333S
1959	RCN08655	1207-PF-KH-CNM-GENRE	Cambodia	Ratanakiri	12.709	104.917	13.7929	107.087	2016	AS-SE-E	S258L/F313S	RCN08655	M74I/N75D/K76T/A144F/L148I/I194T/A220S/Q271E/T333S
1960	RCN08657	1207-PF-KH-CNM-GENRE	Cambodia	Ratanakiri	12.709	104.917	13.7929	107.087	2016	AS-SE-E	S258L/F313S	RCN08657	M74I/N75D/K76T/A144F/L148I/I194T/A220S/Q271E/T333S
1964	RCN08659	1207-PF-KH-CNM-GENRE	Cambodia	Ratanakiri	12.709	104.917	13.7929	107.087	2016	AS-SE-E	S258L/F313S	RCN08659	M74I/N75D/K76T/A144F/L148I/I194T/A220S/Q271E/T333S
1966	RCN08662	1207-PF-KH-CNM-GENRE	Cambodia	Ratanakiri	12.709	104.917	13.7929	107.087	2016	AS-SE-E	S258L/F313S	RCN08662	M74I/N75D/K76T/A144F/L148I/I194T/A220S/Q271E/T333S
1967	RCN08679	1207-PF-KH-CNM-GENRE	Cambodia	Ratanakiri	12.709	104.917	13.7929	107.087	2016	AS-SE-E	S258L/F313S	RCN08679	M74I/N75E/K76T/A220S/Q271E/R371I
1968	RCN08706	1207-PF-KH-CNM-GENRE	Cambodia	Stueng Traeng	12.709	104.917	13.8034	106.177	2016	AS-SE-E	S258L/F313S	RCN08706	M74I/N75E/K76T/A220S/Q271E/N326S/I356T/R371I
1969	RCN08707	1207-PF-KH-CNM-GENRE	Cambodia	Stueng Traeng	12.709	104.917	13.8034	106.177	2016	AS-SE-E	S258L/F313S	RCN08707	M74I/N75E/K76T/A220S/Q271E/N326S/I356T/R371I
1971	RCN08714	1207-PF-KH-CNM-GENRE	Cambodia	Stueng Traeng	12.709	104.917	13.8034	106.177	2016	AS-SE-E	S258L/F313S	RCN08714	M74I/N75E/K76T/A220S/Q271E/N326S/I356T/R371I
1973	RCN08715	1207-PF-KH-CNM-GENRE	Cambodia	Stueng Traeng	12.709	104.917	13.8034	106.177	2016	AS-SE-E	S258L/F313S	RCN08715	M74I/N75E/K76T/A220S/Q271E/N326S/I356T/R371I
1974	RCN08719	1207-PF-KH-CNM-GENRE	Cambodia	Stueng Traeng	12.709	104.917	13.8034	106.177	2016	AS-SE-E	S258L/F313S	RCN08719	M74I/N75E/K76T/A220S/Q271E/N326S/I356T/G367C/R371I
1975	RCN08720	1207-PF-KH-CNM-GENRE	Cambodia	Stueng Traeng	12.709	104.917	13.8034	106.177	2016	AS-SE-E	S258L/F313S	RCN08720	M74I/N75E/K76T/A220S/Q271E/N326S/I356T/G367C/R371I
1976	RCN08724	1207-PF-KH-CNM-GENRE	Cambodia	Ratanakiri	12.709	104.917	13.7929	107.087	2016	AS-SE-E	S258L/F313S	RCN08724	M74I/N75E/K76T/A220S/Q271E/N326S/I356T/R371I
1978	RCN08731	1207-PF-KH-CNM-GENRE	Cambodia	Stueng Traeng	12.709	104.917	13.8034	106.177	2016	AS-SE-E	S258L/F313S	RCN08731	M74I/N75E/K76T/A220S/Q271E/N326S/I356T/R371I
1979	RCN08749	1207-PF-KH-CNM-GENRE	Cambodia	Stueng Traeng	12.709	104.917	13.8034	106.177	2016	AS-SE-E	S258L/F313S	RCN08749	M74I/N75E/K76T/A220S/Q271E/N326S/I356T/R371I
1981	RCN22545	1239-PF-KH-MSF-GENRE	Cambodia	Preah Vihear	12.709	104.917	13.798	105.008	2016	AS-SE-E	S258L/F313S	RCN22545	M74I/N75E/K76T/A220S/Q271E/R371I
1989	RCN08689	1207-PF-KH-CNM-GENRE	Cambodia	Ratanakiri	12.709	104.917	13.7929	107.087	2017	AS-SE-E	S258L/F313S	RCN08689	M74I/N75D/K76T/A144F/L148I/I194T/A220S/Q271E/T333S
1994	RCN08690	1207-PF-KH-CNM-GENRE	Cambodia	Ratanakiri	12.709	104.917	13.7929	107.087	2017	AS-SE-E	S258L/F313S	RCN08690	M74I/N75D/K76T/A144F/L148I/I194T/A220S/Q271E/T333S
3098	RCN08728	1207-PF-KH-CNM-GENRE	Cambodia	Stueng Traeng	12.709	104.917	13.8034	106.177	2017	AS-SE-E	S258L/F313S	RCN08728	M74I/N75E/K76T/A220S/Q271E/N326S/I356T/R371I
3100	RCN08740	1207-PF-KH-CNM-GENRE	Cambodia	Stueng Traeng	12.709	104.917	13.8034	106.177	2017	AS-SE-E	S258L/F313S	RCN08740	M74I/N75E/K76T/A220S/Q271E/N326S/I356T/R371I
3104	RCN08774	1207-PF-KH-CNM-GENRE	Cambodia	Ratanakiri	12.709	104.917	13.7929	107.087	2017	AS-SE-E	S258L/F313S	RCN08774	M74I/N75E/K76T/A220S/Q271E/N326S/I356T/R371I
3106	RCN08778	1207-PF-KH-CNM-GENRE	Cambodia	Stueng Traeng	12.709	104.917	13.8034	106.177	2017	AS-SE-E	S258L/F313S	RCN08778	M74I/N75E/K76T/A220S/Q271E/N326S/I356T/R371I
3109	RCN22561	1239-PF-KH-MSF-GENRE	Cambodia	Preah Vihear	12.709	104.917	13.798	105.008	2017	AS-SE-E	S258L/F313S	RCN22561	M74I/N75E/K76T/A220S/Q271E/N326S/I356T/G367C/R371I
3111	RCN22695	1239-PF-KH-MSF-GENRE	Cambodia	Preah Vihear	12.709	104.917	13.798	105.008	2018	AS-SE-E	S258L/F313S	RCN22695	M74I/N75E/K76T/H97Y/A220S/Q271E/N326S/I356T/R371I
3113	RCN22792	1239-PF-KH-MSF-GENRE	Cambodia	Preah Vihear	12.709	104.917	13.798	105.008	2018	AS-SE-E	S258L/F313S	RCN22792	M74I/N75E/K76T/H97Y/A220S/Q271E/N326S/I356T/R371I
3114	RCN22822	1239-PF-KH-MSF-GENRE	Cambodia	Preah Vihear	12.709	104.917	13.798	105.008	2018	AS-SE-E	S258L/F313S	RCN22822	M74I/N75E/K76T/H97Y/A220S/Q271E/N326S/I356T/R371I
3118	RCN22827	1239-PF-KH-MSF-GENRE	Cambodia	Preah Vihear	12.709	104.917	13.798	105.008	2018	AS-SE-E	S258L/F313S	RCN22827	M74I/N75E/K76T/A220S/Q271E/N326S/M343I/I356T/R371I
3119	RCN22832	1239-PF-KH-MSF-GENRE	Cambodia	Preah Vihear	12.709	104.917	13.798	105.008	2018	AS-SE-E	S258L/F313S	RCN22832	M74I/N75D/K76T/A144F/L148I/I194T/A220S/Q271E/T333S
3121	RCN22842	1239-PF-KH-MSF-GENRE	Cambodia	Preah Vihear	12.709	104.917	13.798	105.008	2018	AS-SE-E	S258L/F313S	RCN22842	M74I/N75E/K76T/T93S/A220S/Q271E/N326S/I356T/R371I
3122	RCN22848	1239-PF-KH-MSF-GENRE	Cambodia	Preah Vihear	12.709	104.917	13.798	105.008	2018	AS-SE-E	S258L/F313S	RCN22848	M74I/N75E/K76T/A220S/Q271E/L308S/N326S/I356T/R371I
3123	RCN22865	1239-PF-KH-MSF-GENRE	Cambodia	Preah Vihear	12.709	104.917	13.798	105.008	2018	AS-SE-E	S258L/F313S	RCN22865	M74I/N75E/K76T/T93S/A220S/Q271E/N326S/I356T/R371I
3124	RCN22892	1239-PF-KH-MSF-GENRE	Cambodia	Preah Vihear	12.709	104.917	13.798	105.008	2018	AS-SE-E	S258L/F313S	RCN22892	M74I/N75E/K76T/A220S/Q271E/N326S/M343I/I356T/R371I
3125	RCN22898	1239-PF-KH-MSF-GENRE	Cambodia	Preah Vihear	12.709	104.917	13.798	105.008	2018	AS-SE-E	S258L/F313S	RCN22898	M74I/N75D/K76T/A144F/L148I/I194T/A220S/Q271E/T333S
3127	RCN22946	1239-PF-KH-MSF-GENRE	Cambodia	Stueng Traeng	12.709	104.917	13.8034	106.177	2018	AS-SE-E	S258L/F313S	RCN22946	M74I/N75E/K76T/A220S/Q271E/N326S/I356T/R371I
3128	RCN22965	1239-PF-KH-MSF-GENRE	Cambodia	Preah Vihear	12.709	104.917	13.798	105.008	2018	AS-SE-E	S258L/F313S	RCN22965	M74I/N75E/K76T/A220S/Q271E/N326S/I356T/R371I
3132	RCN23035	1239-PF-KH-MSF-GENRE	Cambodia	Stueng Traeng	12.709	104.917	13.8034	106.177	2018	AS-SE-E	S258L/F313S	RCN23035	M74I/N75E/K76T/A220S/Q271E/N326S/I356T/R371I
3136	RCN23098	1239-PF-KH-MSF-GENRE	Cambodia	Stueng Traeng	12.709	104.917	13.8034	106.177	2018	AS-SE-E	S258L/F313S	RCN23098	M74I/N75E/K76T/A220S/Q271E/N326S/I356T/R371I
3137	RCN23158	1239-PF-KH-MSF-GENRE	Cambodia	Preah Vihear	12.709	104.917	13.798	105.008	2018	AS-SE-E	S258L/F313S	RCN23158	M74I/N75E/K76T/A220S/Q271E/N326S/I356T/R371I
3138	RCN23163	1239-PF-KH-MSF-GENRE	Cambodia	Stueng Traeng	12.709	104.917	13.8034	106.177	2018	AS-SE-E	S258L/F313S	RCN23163	M74I/N75D/K76T/A144F/L148I/I194T/A220S/Q271E/T333S
3139	RCN23216	1239-PF-KH-MSF-GENRE	Cambodia	Stueng Traeng	12.709	104.917	13.8034	106.177	2018	AS-SE-E	S258L/F313S	RCN23216	M74I/N75E/K76T/A220S/Q271E/N326S/I356T/G367C/R371I
3140	RCN22899	1239-PF-KH-MSF-GENRE	Cambodia	Preah Vihear	12.709	104.917	13.798	105.008	2019	AS-SE-E	S258L/F313S	RCN22899	M74I/N75D/K76T/A144F/L148I/I194T/A220S/Q271E/T333S
3510	RCN22900	1239-PF-KH-MSF-GENRE	Cambodia	Preah Vihear	12.709	104.917	13.798	105.008	2019	AS-SE-E	S258L/F313S	RCN22900	M74I/N75D/K76T/A144F/L148I/I194T/A220S/Q271E/T333S
3512	PH0381-C	1044-PF-KH-FAIRHURST	Cambodia	Ratanakiri	12.709	104.917	13.7929	107.087	2010	AS-SE-E	S258L/F313S	PH0381-C
3526	PH0625-C	1052-PF-TRAC-WHITE	Cambodia	Ratanakiri	12.709	104.917	13.7929	107.087	2011	AS-SE-E	S258L/F313S	PH0625-C
3527	PH0631-C	1052-PF-TRAC-WHITE	Cambodia	Ratanakiri	12.709	104.917	13.7929	107.087	2011	AS-SE-E	S258L/F313S	PH0631-C
3533	PH0783-C	1052-PF-TRAC-WHITE	Cambodia	Ratanakiri	12.709	104.917	13.7929	107.087	2011	AS-SE-E	S258L/F313S	PH0783-C
3534	PH1073-C	1044-PF-KH-FAIRHURST	Cambodia	Ratanakiri	12.709	104.917	13.7929	107.087	2012	AS-SE-E	S258L/F313S	PH1073-C
3535	RCN13907	1180-PF-TRAC2-DONDORP	India	Tripura	22.8828	79.6225	23.7445	91.7418	2016	AS-S-FE	S258L/F313S	RCN13907	M74I/N75E/K76T/A220S/Q271E/R371I
498	QE0347-C	1008-PF-SEA-RINGWALD	Laos	Savannakhet	18.4952	103.768	16.5537	105.706	2010	AS-SE-E	S258L/F313S	QE0347-C	M74I/N75E/K76T/A220S/Q271E/R371I
499	QE0350-C	1008-PF-SEA-RINGWALD	Laos	Savannakhet	18.4952	103.768	16.5537	105.706	2010	AS-SE-E	S258L/F313S	QE0350-C	M74I/N75E/K76T/A220S/Q271E/R371I
501	QE0375-C	1008-PF-SEA-RINGWALD	Laos	Savannakhet	18.4952	103.768	16.5537	105.706	2010	AS-SE-E	S258L/F313S	QE0375-C	M74I/N75E/K76T/A220S/Q271E/R371I
502	QE0376-C	1008-PF-SEA-RINGWALD	Laos	Savannakhet	18.4952	103.768	16.5537	105.706	2010	AS-SE-E	S258L/F313S	QE0376-C	M74I/N75E/K76T/A220S/Q271E/R371I
504	QE0385-C	1008-PF-SEA-RINGWALD	Laos	Savannakhet	18.4952	103.768	16.5537	105.706	2010	AS-SE-E	S258L/F313S	QE0385-C	M74I/N75E/K76T/A220S/Q271E/R371I
505	QE0386-C	1008-PF-SEA-RINGWALD	Laos	Savannakhet	18.4952	103.768	16.5537	105.706	2010	AS-SE-E	S258L/F313S	QE0386-C	M74I/N75D/K76T/A144F/L148I/I194T/A220S/Q271E/T333S
515	QE0387-C	1008-PF-SEA-RINGWALD	Laos	Savannakhet	18.4952	103.768	16.5537	105.706	2010	AS-SE-E	S258L/F313S	QE0387-C	M74I/N75E/K76T/A220S/Q271E/R371I
517	QE0398-C	1052-PF-TRAC-WHITE	Laos	Attapeu	18.4952	103.768	14.7939	106.945	2011	AS-SE-E	S258L/F313S	QE0398-C	M74I/N75E/K76T/A220S/Q271E/R371I
518	QE0414-C	1052-PF-TRAC-WHITE	Laos	Attapeu	18.4952	103.768	14.7939	106.945	2011	AS-SE-E	S258L/F313S	QE0414-C	M74I/N75E/K76T/A220S/Q271E/R371I
522	QE0419-C	1052-PF-TRAC-WHITE	Laos	Attapeu	18.4952	103.768	14.7939	106.945	2011	AS-SE-E	S258L/F313S	QE0419-C	M74I/N75E/K76T/A220S/Q271E/R371I
523	QE0421-C	1052-PF-TRAC-WHITE	Laos	Attapeu	18.4952	103.768	14.7939	106.945	2011	AS-SE-E	S258L/F313S	QE0421-C	M74I/N75E/K76T/A220S/Q271E/R371I
524	QE0423-C	1052-PF-TRAC-WHITE	Laos	Attapeu	18.4952	103.768	14.7939	106.945	2011	AS-SE-E	S258L/F313S	QE0423-C	M74I/N75E/K76T/A220S/Q271E/N326S/I356T/R371I
525	QE0427-C	1052-PF-TRAC-WHITE	Laos	Attapeu	18.4952	103.768	14.7939	106.945	2011	AS-SE-E	S258L/F313S	QE0427-C	M74I/N75E/K76T/I194T/A220S/Q271E/R371I
526	QE0431-C	1052-PF-TRAC-WHITE	Laos	Attapeu	18.4952	103.768	14.7939	106.945	2011	AS-SE-E	S258L/F313S	QE0431-C	M74I/N75D/K76T/A144F/L148I/I194T/A220S/Q271E/T333S
527	QE0436-C	1052-PF-TRAC-WHITE	Laos	Attapeu	18.4952	103.768	14.7939	106.945	2011	AS-SE-E	S258L/F313S	QE0436-C	M74I/N75E/K76T/A220S/Q271E/N326S/I356T/R371I
528	QE0447-C	1052-PF-TRAC-WHITE	Laos	Attapeu	18.4952	103.768	14.7939	106.945	2011	AS-SE-E	S258L/F313S	QE0447-C	M74I/N75E/K76T/A220S/Q271E/R371I
529	QE0478-C	1052-PF-TRAC-WHITE	Laos	Attapeu	18.4952	103.768	14.7939	106.945	2011	AS-SE-E	S258L/F313S	QE0478-C	M74I/N75E/K76T/A220S/Q271E/R371I
531	QE0453-C	1052-PF-TRAC-WHITE	Laos	Attapeu	18.4952	103.768	14.7939	106.945	2012	AS-SE-E	S258L/F313S	QE0453-C	M74I/N75E/K76T/A220S/Q271E/N326S/I356T/R371I
532	QE0454-C	1052-PF-TRAC-WHITE	Laos	Attapeu	18.4952	103.768	14.7939	106.945	2012	AS-SE-E	S258L/F313S	QE0454-C	M74I/N75D/K76T/A144F/L148I/I194T/A220S/Q271E/T333S
534	QE0455-C	1052-PF-TRAC-WHITE	Laos	Attapeu	18.4952	103.768	14.7939	106.945	2012	AS-SE-E	S258L/F313S	QE0455-C	M74I/N75D/K76T/A144F/L148I/I194T/A220S/Q271E/T333S
568	QE0458-C	1052-PF-TRAC-WHITE	Laos	Attapeu	18.4952	103.768	14.7939	106.945	2012	AS-SE-E	S258L/F313S	QE0458-C	M74I/N75E/K76T/A220S/Q271E/N326S/I356T/R371I
569	QE0460-C	1052-PF-TRAC-WHITE	Laos	Attapeu	18.4952	103.768	14.7939	106.945	2012	AS-SE-E	S258L/F313S	QE0460-C	M74I/N75E/K76T/A220S/Q271E/N326S/I356T/R371I
857	QE0461-C	1052-PF-TRAC-WHITE	Laos	Attapeu	18.4952	103.768	14.7939	106.945	2012	AS-SE-E	S258L/F313S	QE0461-C	M74I/N75E/K76T/A220S/Q271E/R371I
858	QE0463-C	1052-PF-TRAC-WHITE	Laos	Attapeu	18.4952	103.768	14.7939	106.945	2012	AS-SE-E	S258L/F313S	QE0463-C	M74I/N75E/K76T/A220S/Q271E/N326S/I356T/R371I
859	QE0464-C	1052-PF-TRAC-WHITE	Laos	Attapeu	18.4952	103.768	14.7939	106.945	2012	AS-SE-E	S258L/F313S	QE0464-C	M74I/N75D/K76T/A144F/L148I/I194T/A220S/Q271E/T333S
861	QE0465-C	1052-PF-TRAC-WHITE	Laos	Attapeu	18.4952	103.768	14.7939	106.945	2012	AS-SE-E	S258L/F313S	QE0465-C	M74I/N75D/K76T/A144F/L148I/I194T/A220S/Q271E/T333S
862	QE0468-C	1052-PF-TRAC-WHITE	Laos	Attapeu	18.4952	103.768	14.7939	106.945	2012	AS-SE-E	S258L/F313S	QE0468-C	M74I/N75E/K76T/A220S/Q271E/R371I
863	QE0471-C	1052-PF-TRAC-WHITE	Laos	Attapeu	18.4952	103.768	14.7939	106.945	2012	AS-SE-E	S258L/F313S	QE0471-C	M74I/N75E/K76T/A220S/Q271E/R371I
865	QE0474-C	1052-PF-TRAC-WHITE	Laos	Attapeu	18.4952	103.768	14.7939	106.945	2012	AS-SE-E	S258L/F313S	QE0474-C	M74I/N75E/K76T/I194T/A220S/Q271E/R371I
1982	QE0475-C	1052-PF-TRAC-WHITE	Laos	Attapeu	18.4952	103.768	14.7939	106.945	2012	AS-SE-E	S258L/F313S	QE0475-C	M74I/N75E/K76T/A220S/Q271E/N326S/I356T/R371I
1983	RCN08925	1208-PF-LA-CMPE-GENRE	Laos	Attapeu	18.4952	103.768	14.7939	106.945	2017	AS-SE-E	S258L/F313S	RCN08925	M74I/N75D/K76T/A144F/L148I/I194T/A220S/Q271E/T333S
1984	RCN08927	1208-PF-LA-CMPE-GENRE	Laos	Attapeu	18.4952	103.768	14.7939	106.945	2017	AS-SE-E	S258L/F313S	RCN08927	M74I/N75D/K76T/A144F/L148I/I194T/A220S/Q271E/T333S
1987	RCN08930	1208-PF-LA-CMPE-GENRE	Laos	Attapeu	18.4952	103.768	14.7939	106.945	2017	AS-SE-E	S258L/F313S	RCN08930	M74I/N75D/K76T/A144F/L148I/I194T/A220S/Q271E/T333S
1988	RCN08933	1208-PF-LA-CMPE-GENRE	Laos	Attapeu	18.4952	103.768	14.7939	106.945	2017	AS-SE-E	S258L/F313S	RCN08933	M74I/N75D/K76T/A144F/L148I/I194T/A220S/Q271E/T333S
2000	RCN08934	1208-PF-LA-CMPE-GENRE	Laos	Attapeu	18.4952	103.768	14.7939	106.945	2017	AS-SE-E	S258L/F313S	RCN08934	M74I/N75E/K76T/A220S/Q271E/N326S/I356T/R371I
2001	RCN08935	1208-PF-LA-CMPE-GENRE	Laos	Attapeu	18.4952	103.768	14.7939	106.945	2017	AS-SE-E	S258L/F313S	RCN08935	M74I/N75D/K76T/A144F/L148I/I194T/A220S/Q271E/T333S
2002	RCN08936	1208-PF-LA-CMPE-GENRE	Laos	Attapeu	18.4952	103.768	14.7939	106.945	2017	AS-SE-E	S258L/F313S	RCN08936	M74I/N75D/K76T/A144F/L148I/I194T/A220S/Q271E/T333S
2003	RCN08947	1208-PF-LA-CMPE-GENRE	Laos	Attapeu	18.4952	103.768	14.7939	106.945	2017	AS-SE-E	S258L/F313S	RCN08947	M74I/N75D/K76T/A144F/L148I/I194T/A220S/Q271E/T333S
2004	RCN08949	1208-PF-LA-CMPE-GENRE	Laos	Attapeu	18.4952	103.768	14.7939	106.945	2017	AS-SE-E	S258L/F313S	RCN08949	M74I/N75E/K76T/A220S/Q271E/N326S/I356T/R371I
2005	RCN08950	1208-PF-LA-CMPE-GENRE	Laos	Attapeu	18.4952	103.768	14.7939	106.945	2017	AS-SE-E	S258L/F313S	RCN08950	M74I/N75D/K76T/A144F/L148I/I194T/A220S/Q271E/T333S
2006	RCN08951	1208-PF-LA-CMPE-GENRE	Laos	Attapeu	18.4952	103.768	14.7939	106.945	2017	AS-SE-E	S258L/F313S	RCN08951	M74I/N75D/K76T/A144F/L148I/I194T/A220S/Q271E/T333S
2007	RCN08952	1208-PF-LA-CMPE-GENRE	Laos	Attapeu	18.4952	103.768	14.7939	106.945	2017	AS-SE-E	S258L/F313S	RCN08952	M74I/N75D/K76T/A144F/L148I/I194T/A220S/Q271E/T333S
2008	RCN08953	1208-PF-LA-CMPE-GENRE	Laos	Attapeu	18.4952	103.768	14.7939	106.945	2017	AS-SE-E	S258L/F313S	RCN08953	M74I/N75D/K76T/A144F/L148I/I194T/A220S/Q271E/T333S
2010	RCN08954	1208-PF-LA-CMPE-GENRE	Laos	Attapeu	18.4952	103.768	14.7939	106.945	2017	AS-SE-E	S258L/F313S	RCN08954	M74I/N75E/K76T/A220S/Q271E/N326S/I356T/R371I
2012	RCN08973	1208-PF-LA-CMPE-GENRE	Laos	Champasak	18.4952	103.768	14.7717	105.961	2017	AS-SE-E	S258L/F313S	RCN08973	M74I/N75E/K76T/A220S/Q271E/N326S/I356T/R371I
2013	RCN08974	1208-PF-LA-CMPE-GENRE	Laos	Champasak	18.4952	103.768	14.7717	105.961	2017	AS-SE-E	S258L/F313S	RCN08974	M74I/N75E/K76T/A220S/Q271E/N326S/I356T/R371I
2014	RCN08975	1208-PF-LA-CMPE-GENRE	Laos	Champasak	18.4952	103.768	14.7717	105.961	2017	AS-SE-E	S258L/F313S	RCN08975	M74I/N75E/K76T/F145I/A220S/Q271E/N326S/I356T/R371I
2015	RCN08978	1208-PF-LA-CMPE-GENRE	Laos	Champasak	18.4952	103.768	14.7717	105.961	2017	AS-SE-E	S258L/F313S	RCN08978	M74I/N75E/K76T/A220S/Q271E/N326S/I356T/R371I
2016	RCN08979	1208-PF-LA-CMPE-GENRE	Laos	Champasak	18.4952	103.768	14.7717	105.961	2017	AS-SE-E	S258L/F313S	RCN08979	M74I/N75E/K76T/A220S/Q271E/N326S/I356T/R371I
2018	RCN08981	1208-PF-LA-CMPE-GENRE	Laos	Champasak	18.4952	103.768	14.7717	105.961	2017	AS-SE-E	S258L/F313S	RCN08981	M74I/N75E/K76T/A220S/Q271E/N326S/I356T/R371I
2019	RCN08982	1208-PF-LA-CMPE-GENRE	Laos	Champasak	18.4952	103.768	14.7717	105.961	2017	AS-SE-E	S258L/F313S	RCN08982	M74I/N75E/K76T/A220S/Q271E/N326S/I356T/R371I
2022	RCN09014	1208-PF-LA-CMPE-GENRE	Laos	Champasak	18.4952	103.768	14.7717	105.961	2017	AS-SE-E	S258L/F313S	RCN09014	M74I/N75E/K76T/A220S/Q271E/N326S/I356T/R371I
2023	RCN09052	1208-PF-LA-CMPE-GENRE	Laos	Salavan	18.4952	103.768	15.8484	106.274	2017	AS-SE-E	S258L/F313S	RCN09052	M74I/N75E/K76T/H97L/A220S/Q271E/N326S/I356T/R371I
2024	RCN09053	1208-PF-LA-CMPE-GENRE	Laos	Salavan	18.4952	103.768	15.8484	106.274	2017	AS-SE-E	S258L/F313S	RCN09053	M74I/N75E/K76T/H97L/A220S/Q271E/N326S/I356T/R371I
2025	RCN09054	1208-PF-LA-CMPE-GENRE	Laos	Salavan	18.4952	103.768	15.8484	106.274	2017	AS-SE-E	S258L/F313S	RCN09054	M74I/N75E/K76T/H97L/A220S/Q271E/N326S/I356T/R371I
2026	RCN09061	1208-PF-LA-CMPE-GENRE	Laos	Salavan	18.4952	103.768	15.8484	106.274	2017	AS-SE-E	S258L/F313S	RCN09061	M74I/N75E/K76T/H97L/A220S/Q271E/N326S/I356T/R371I
2028	RCN09105	1208-PF-LA-CMPE-GENRE	Laos	Savannakhet	18.4952	103.768	16.5537	105.706	2017	AS-SE-E	S258L/F313S	RCN09105	M74I/N75E/K76T/A220S/Q271E/R371I
2029	RCN09118	1208-PF-LA-CMPE-GENRE	Laos	Savannakhet	18.4952	103.768	16.5537	105.706	2017	AS-SE-E	S258L/F313S	RCN09118	M74I/N75E/K76T/A220S/Q271E/R371I
2030	RCN09135	1208-PF-LA-CMPE-GENRE	Laos	Savannakhet	18.4952	103.768	16.5537	105.706	2017	AS-SE-E	S258L/F313S	RCN09135	M74I/N75E/K76T/H97L/A220S/Q271E/N326S/I356T/R371I
2032	RCN09136	1208-PF-LA-CMPE-GENRE	Laos	Savannakhet	18.4952	103.768	16.5537	105.706	2017	AS-SE-E	S258L/F313S	RCN09136	M74I/N75E/K76T/H97L/A220S/Q271E/N326S/I356T/R371I
2034	RCN09137	1208-PF-LA-CMPE-GENRE	Laos	Savannakhet	18.4952	103.768	16.5537	105.706	2017	AS-SE-E	S258L/F313S	RCN09137	M74I/N75E/K76T/A220S/Q271E/R371I
2035	RCN09140	1208-PF-LA-CMPE-GENRE	Laos	Savannakhet	18.4952	103.768	16.5537	105.706	2017	AS-SE-E	S258L/F313S	RCN09140	M74I/N75E/K76T/A220S/Q271E/R371I
2039	RCN09146	1208-PF-LA-CMPE-GENRE	Laos	Savannakhet	18.4952	103.768	16.5537	105.706	2017	AS-SE-E	S258L/F313S	RCN09146	M74I/N75E/K76T/A220S/Q271E/R371I
2040	RCN09148	1208-PF-LA-CMPE-GENRE	Laos	Savannakhet	18.4952	103.768	16.5537	105.706	2017	AS-SE-E	S258L/F313S	RCN09148	M74I/N75E/K76T/A220S/Q271E/R371I
2043	RCN11512	1208-PF-LA-CMPE-GENRE	Laos	Savannakhet	18.4952	103.768	16.5537	105.706	2017	AS-SE-E	S258L/F313S	RCN11512	M74I/N75E/K76T/A220S/Q271E/R371I
2050	RCN11519	1208-PF-LA-CMPE-GENRE	Laos	Savannakhet	18.4952	103.768	16.5537	105.706	2017	AS-SE-E	S258L/F313S	RCN11519	M74I/N75E/K76T/A220S/Q271E/R371I
2051	RCN11543	1208-PF-LA-CMPE-GENRE	Laos	Savannakhet	18.4952	103.768	16.5537	105.706	2017	AS-SE-E	S258L/F313S	RCN11543	M74I/N75E/K76T/A220S/Q271E/R371I
2052	RCN11553	1208-PF-LA-CMPE-GENRE	Laos	Savannakhet	18.4952	103.768	16.5537	105.706	2017	AS-SE-E	S258L/F313S	RCN11553	M74I/N75D/K76T/A144F/L148I/I194T/A220S/Q271E/T333S
2053	RCN11555	1208-PF-LA-CMPE-GENRE	Laos	Savannakhet	18.4952	103.768	16.5537	105.706	2017	AS-SE-E	S258L/F313S	RCN11555	M74I/N75E/K76T/A220S/Q271E/R371I
2054	RCN11557	1208-PF-LA-CMPE-GENRE	Laos	Savannakhet	18.4952	103.768	16.5537	105.706	2017	AS-SE-E	S258L/F313S	RCN11557	M74I/N75E/K76T/A220S/Q271E/R371I
2055	RCN11564	1208-PF-LA-CMPE-GENRE	Laos	Savannakhet	18.4952	103.768	16.5537	105.706	2017	AS-SE-E	S258L/F313S	RCN11564	M74I/N75E/K76T/A220S/Q271E/R371I
2056	RCN11565	1208-PF-LA-CMPE-GENRE	Laos	Savannakhet	18.4952	103.768	16.5537	105.706	2017	AS-SE-E	S258L/F313S	RCN11565	M74I/N75E/K76T/A220S/Q271E/R371I
2057	RCN11566	1208-PF-LA-CMPE-GENRE	Laos	Savannakhet	18.4952	103.768	16.5537	105.706	2017	AS-SE-E	S258L/F313S	RCN11566	M74I/N75E/K76T/A220S/Q271E/R371I
2058	RCN11567	1208-PF-LA-CMPE-GENRE	Laos	Savannakhet	18.4952	103.768	16.5537	105.706	2017	AS-SE-E	S258L/F313S	RCN11567	M74I/N75E/K76T/A220S/Q271E/R371I
2059	RCN11574	1208-PF-LA-CMPE-GENRE	Laos	Savannakhet	18.4952	103.768	16.5537	105.706	2017	AS-SE-E	S258L/F313S	RCN11574	M74I/N75E/K76T/A220S/Q271E/R371I
2060	RCN11575	1208-PF-LA-CMPE-GENRE	Laos	Savannakhet	18.4952	103.768	16.5537	105.706	2017	AS-SE-E	S258L/F313S	RCN11575	M74I/N75E/K76T/A220S/Q271E/R371I
2061	RCN11600	1208-PF-LA-CMPE-GENRE	Laos	Savannakhet	18.4952	103.768	16.5537	105.706	2017	AS-SE-E	S258L/F313S	RCN11600	M74I/N75E/K76T/A220S/Q271E/R371I
2062	RCN11603	1208-PF-LA-CMPE-GENRE	Laos	Savannakhet	18.4952	103.768	16.5537	105.706	2017	AS-SE-E	S258L/F313S	RCN11603	M74I/N75E/K76T/A220S/Q271E/R371I
2063	RCN11604	1208-PF-LA-CMPE-GENRE	Laos	Savannakhet	18.4952	103.768	16.5537	105.706	2017	AS-SE-E	S258L/F313S	RCN11604	M74I/N75E/K76T/A220S/Q271E/R371I
2064	RCN11607	1208-PF-LA-CMPE-GENRE	Laos	Savannakhet	18.4952	103.768	16.5537	105.706	2017	AS-SE-E	S258L/F313S	RCN11607	M74I/N75E/K76T/A220S/Q271E/R371I
2065	RCN11610	1208-PF-LA-CMPE-GENRE	Laos	Savannakhet	18.4952	103.768	16.5537	105.706	2017	AS-SE-E	S258L/F313S	RCN11610	M74I/N75E/K76T/A220S/Q271E/R371I
2066	RCN11615	1208-PF-LA-CMPE-GENRE	Laos	Savannakhet	18.4952	103.768	16.5537	105.706	2017	AS-SE-E	S258L/F313S	RCN11615	M74I/N75E/K76T/A220S/Q271E/R371I
2067	RCN11622	1208-PF-LA-CMPE-GENRE	Laos	Savannakhet	18.4952	103.768	16.5537	105.706	2017	AS-SE-E	S258L/F313S	RCN11622	M74I/N75E/K76T/A220S/Q271E/R371I
2068	RCN11627	1208-PF-LA-CMPE-GENRE	Laos	Savannakhet	18.4952	103.768	16.5537	105.706	2017	AS-SE-E	S258L/F313S	RCN11627	M74I/N75E/K76T/A220S/Q271E/R371I
2069	RCN11628	1208-PF-LA-CMPE-GENRE	Laos	Savannakhet	18.4952	103.768	16.5537	105.706	2017	AS-SE-E	S258L/F313S	RCN11628	M74I/N75E/K76T/A220S/Q271E/R371I
2070	RCN11631	1208-PF-LA-CMPE-GENRE	Laos	Savannakhet	18.4952	103.768	16.5537	105.706	2017	AS-SE-E	S258L/F313S	RCN11631	M74I/N75E/K76T/A220S/Q271E/R371I
2077	RCN11651	1208-PF-LA-CMPE-GENRE	Laos	Savannakhet	18.4952	103.768	16.5537	105.706	2017	AS-SE-E	S258L/F313S	RCN11651	M74I/N75E/K76T/A220S/Q271E/R371I
2080	RCN11652	1208-PF-LA-CMPE-GENRE	Laos	Savannakhet	18.4952	103.768	16.5537	105.706	2017	AS-SE-E	S258L/F313S	RCN11652	M74I/N75E/K76T/A220S/Q271E/R371I
2082	RCN11653	1208-PF-LA-CMPE-GENRE	Laos	Savannakhet	18.4952	103.768	16.5537	105.706	2017	AS-SE-E	S258L/F313S	RCN11653	M74I/N75E/K76T/A220S/Q271E/R371I
2084	RCN11655	1208-PF-LA-CMPE-GENRE	Laos	Savannakhet	18.4952	103.768	16.5537	105.706	2017	AS-SE-E	S258L/F313S	RCN11655	M74I/N75E/K76T/A220S/Q271E/R371I
2086	RCN11670	1208-PF-LA-CMPE-GENRE	Laos	Savannakhet	18.4952	103.768	16.5537	105.706	2017	AS-SE-E	S258L/F313S	RCN11670	M74I/N75E/K76T/A220S/Q271E/R371I
2088	RCN11671	1208-PF-LA-CMPE-GENRE	Laos	Savannakhet	18.4952	103.768	16.5537	105.706	2017	AS-SE-E	S258L/F313S	RCN11671	M74I/N75E/K76T/A220S/Q271E/R371I
2091	RCN11672	1208-PF-LA-CMPE-GENRE	Laos	Savannakhet	18.4952	103.768	16.5537	105.706	2017	AS-SE-E	S258L/F313S	RCN11672	M74I/N75E/K76T/A220S/Q271E/R371I
2093	RCN11681	1208-PF-LA-CMPE-GENRE	Laos	Savannakhet	18.4952	103.768	16.5537	105.706	2017	AS-SE-E	S258L/F313S	RCN11681	M74I/N75D/K76T/A144F/L148I/I194T/A220S/Q271E/T333S
2097	RCN11685	1208-PF-LA-CMPE-GENRE	Laos	Savannakhet	18.4952	103.768	16.5537	105.706	2017	AS-SE-E	S258L/F313S	RCN11685	M74I/N75D/K76T/A144F/L148I/I194T/A220S/Q271E/T333S
2099	RCN11688	1208-PF-LA-CMPE-GENRE	Laos	Savannakhet	18.4952	103.768	16.5537	105.706	2017	AS-SE-E	S258L/F313S	RCN11688	M74I/N75D/K76T/A144F/L148I/I194T/A220S/Q271E/T333S
2100	RCN11691	1208-PF-LA-CMPE-GENRE	Laos	Savannakhet	18.4952	103.768	16.5537	105.706	2017	AS-SE-E	S258L/F313S	RCN11691	M74I/N75D/K76T/A144F/L148I/I194T/A220S/Q271E/T333S
2101	RCN11747	1208-PF-LA-CMPE-GENRE	Laos	Savannakhet	18.4952	103.768	16.5537	105.706	2017	AS-SE-E	S258L/F313S	RCN11747	M74I/N75E/K76T/H97L/A220S/Q271E/N326S/I356T/R371I
2102	RCN11748	1208-PF-LA-CMPE-GENRE	Laos	Savannakhet	18.4952	103.768	16.5537	105.706	2017	AS-SE-E	S258L/F313S	RCN11748	M74I/N75E/K76T/H97L/A220S/Q271E/N326S/I356T/R371I
2106	RCN11772	1208-PF-LA-CMPE-GENRE	Laos	Salavan	18.4952	103.768	15.8484	106.274	2017	AS-SE-E	S258L/F313S	RCN11772	M74I/N75E/K76T/H97L/A220S/Q271E/N326S/I356T/R371I
2110	RCN11773	1208-PF-LA-CMPE-GENRE	Laos	Salavan	18.4952	103.768	15.8484	106.274	2017	AS-SE-E	S258L/F313S	RCN11773	M74I/N75E/K76T/H97L/A220S/Q271E/N326S/I356T/R371I
2111	RCN11774	1208-PF-LA-CMPE-GENRE	Laos	Salavan	18.4952	103.768	15.8484	106.274	2017	AS-SE-E	S258L/F313S	RCN11774	M74I/N75E/K76T/H97L/A220S/Q271E/N326S/I356T/R371I
2113	RCN11775	1208-PF-LA-CMPE-GENRE	Laos	Salavan	18.4952	103.768	15.8484	106.274	2017	AS-SE-E	S258L/F313S	RCN11775	M74I/N75E/K76T/H97L/A220S/Q271E/N326S/I356T/R371I
2114	RCN11776	1208-PF-LA-CMPE-GENRE	Laos	Salavan	18.4952	103.768	15.8484	106.274	2017	AS-SE-E	S258L/F313S	RCN11776	M74I/N75E/K76T/H97L/A220S/Q271E/N326S/I356T/R371I
2115	RCN11793	1208-PF-LA-CMPE-GENRE	Laos	Salavan	18.4952	103.768	15.8484	106.274	2017	AS-SE-E	S258L/F313S	RCN11793	M74I/N75E/K76T/A220S/Q271E/R371I
2116	RCN11795	1208-PF-LA-CMPE-GENRE	Laos	Salavan	18.4952	103.768	15.8484	106.274	2017	AS-SE-E	S258L/F313S	RCN11795	M74I/N75E/K76T/A220S/Q271E/R371I
2118	RCN11797	1208-PF-LA-CMPE-GENRE	Laos	Salavan	18.4952	103.768	15.8484	106.274	2017	AS-SE-E	S258L/F313S	RCN11797	M74I/N75E/K76T/A220S/Q271E/R371I
2119	RCN11812	1208-PF-LA-CMPE-GENRE	Laos	Salavan	18.4952	103.768	15.8484	106.274	2017	AS-SE-E	S258L/F313S	RCN11812	M74I/N75E/K76T/A220S/Q271E/R371I
2120	RCN11813	1208-PF-LA-CMPE-GENRE	Laos	Sekong	18.4952	103.768	15.582	107.039	2017	AS-SE-E	S258L/F313S	RCN11813	M74I/N75E/K76T/A220S/Q271E/N326S/I356T/R371I
2121	RCN11816	1208-PF-LA-CMPE-GENRE	Laos	Sekong	18.4952	103.768	15.582	107.039	2017	AS-SE-E	S258L/F313S	RCN11816	M74I/N75E/K76T/A220S/Q271E/N326S/I356T/R371I
2122	RCN11817	1208-PF-LA-CMPE-GENRE	Laos	Sekong	18.4952	103.768	15.582	107.039	2017	AS-SE-E	S258L/F313S	RCN11817	M74I/N75E/K76T/A220S/Q271E/N326S/I356T/R371I
2123	RCN11822	1208-PF-LA-CMPE-GENRE	Laos	Sekong	18.4952	103.768	15.582	107.039	2017	AS-SE-E	S258L/F313S	RCN11822	M74I/N75E/K76T/A220S/Q271E/N326S/I356T/R371I
2125	RCN11823	1208-PF-LA-CMPE-GENRE	Laos	Sekong	18.4952	103.768	15.582	107.039	2017	AS-SE-E	S258L/F313S	RCN11823	M74I/N75E/K76T/A220S/Q271E/N326S/I356T/R371I
2126	RCN11824	1208-PF-LA-CMPE-GENRE	Laos	Sekong	18.4952	103.768	15.582	107.039	2017	AS-SE-E	S258L/F313S	RCN11824	M74I/N75E/K76T/A220S/Q271E/N326S/I356T/R371I
2127	RCN11827	1208-PF-LA-CMPE-GENRE	Laos	Sekong	18.4952	103.768	15.582	107.039	2017	AS-SE-E	S258L/F313S	RCN11827	M74I/N75E/K76T/A220S/Q271E/N326S/I356T/R371I
2128	RCN11828	1208-PF-LA-CMPE-GENRE	Laos	Sekong	18.4952	103.768	15.582	107.039	2017	AS-SE-E	S258L/F313S	RCN11828	M74I/N75E/K76T/A220S/Q271E/N326S/I356T/R371I
2129	RCN11841	1208-PF-LA-CMPE-GENRE	Laos	Champasak	18.4952	103.768	14.7717	105.961	2017	AS-SE-E	S258L/F313S	RCN11841	M74I/N75E/K76T/A220S/Q271E/N326S/I356T/R371I
2130	RCN11843	1208-PF-LA-CMPE-GENRE	Laos	Champasak	18.4952	103.768	14.7717	105.961	2017	AS-SE-E	S258L/F313S	RCN11843	M74I/N75E/K76T/A220S/Q271E/N326S/I356T/R371I
2131	RCN11884	1208-PF-LA-CMPE-GENRE	Laos	Champasak	18.4952	103.768	14.7717	105.961	2017	AS-SE-E	S258L/F313S	RCN11884	M74I/N75E/K76T/A220S/Q271E/N326S/I356T/R371I
2134	RCN11886	1208-PF-LA-CMPE-GENRE	Laos	Champasak	18.4952	103.768	14.7717	105.961	2017	AS-SE-E	S258L/F313S	RCN11886	M74I/N75E/K76T/A220S/Q271E/N326S/I356T/R371I
2135	RCN11899	1208-PF-LA-CMPE-GENRE	Laos	Attapeu	18.4952	103.768	14.7939	106.945	2017	AS-SE-E	S258L/F313S	RCN11899	M74I/N75D/K76T/A144F/L148I/I194T/A220S/Q271E/T333S
2137	RCN11904	1208-PF-LA-CMPE-GENRE	Laos	Attapeu	18.4952	103.768	14.7939	106.945	2017	AS-SE-E	S258L/F313S	RCN11904	M74I/N75D/K76T/A144F/L148I/I194T/A220S/Q271E/T333S
2138	RCN11907	1208-PF-LA-CMPE-GENRE	Laos	Attapeu	18.4952	103.768	14.7939	106.945	2017	AS-SE-E	S258L/F313S	RCN11907	M74I/N75D/K76T/A144F/L148I/I194T/A220S/Q271E/T333S
2140	RCN11908	1208-PF-LA-CMPE-GENRE	Laos	Attapeu	18.4952	103.768	14.7939	106.945	2017	AS-SE-E	S258L/F313S	RCN11908	M74I/N75D/K76T/A144F/L148I/I194T/A220S/Q271E/T333S
2144	RCN11910	1208-PF-LA-CMPE-GENRE	Laos	Attapeu	18.4952	103.768	14.7939	106.945	2017	AS-SE-E	S258L/F313S	RCN11910	M74I/N75D/K76T/A144F/L148I/I194T/A220S/Q271E/T333S
2151	RCN11913	1208-PF-LA-CMPE-GENRE	Laos	Attapeu	18.4952	103.768	14.7939	106.945	2017	AS-SE-E	S258L/F313S	RCN11913	M74I/N75E/K76T/A220S/Q271E/N326S/I356T/R371I
2152	RCN11914	1208-PF-LA-CMPE-GENRE	Laos	Attapeu	18.4952	103.768	14.7939	106.945	2017	AS-SE-E	S258L/F313S	RCN11914	M74I/N75D/K76T/A144F/L148I/I194T/A220S/Q271E/T333S
2153	RCN11924	1208-PF-LA-CMPE-GENRE	Laos	Attapeu	18.4952	103.768	14.7939	106.945	2017	AS-SE-E	S258L/F313S	RCN11924	M74I/N75E/K76T/H97Y/A220S/Q271E/N326S/I356T/R371I
2154	RCN11936	1208-PF-LA-CMPE-GENRE	Laos	Attapeu	18.4952	103.768	14.7939	106.945	2017	AS-SE-E	S258L/F313S	RCN11936	M74I/N75E/K76T/A220S/Q271E/N326S/I356T/R371I
2156	RCN11937	1208-PF-LA-CMPE-GENRE	Laos	Attapeu	18.4952	103.768	14.7939	106.945	2017	AS-SE-E	S258L/F313S	RCN11937	M74I/N75E/K76T/A220S/Q271E/R371I
2157	RCN11501	1208-PF-LA-CMPE-GENRE	Laos	Savannakhet	18.4952	103.768	16.5537	105.706	2018	AS-SE-E	S258L/F313S	RCN11501	M74I/N75E/K76T/A220S/Q271E/R371I
2158	RCN11546	1208-PF-LA-CMPE-GENRE	Laos	Savannakhet	18.4952	103.768	16.5537	105.706	2018	AS-SE-E	S258L/F313S	RCN11546	M74I/N75E/K76T/H97L/A220S/Q271E/N326S/I356T/R371I
2160	RCN11561	1208-PF-LA-CMPE-GENRE	Laos	Savannakhet	18.4952	103.768	16.5537	105.706	2018	AS-SE-E	S258L/F313S	RCN11561	M74I/N75E/K76T/H97L/A220S/Q271E/N326S/I356T/R371I
2161	RCN11562	1208-PF-LA-CMPE-GENRE	Laos	Savannakhet	18.4952	103.768	16.5537	105.706	2018	AS-SE-E	S258L/F313S	RCN11562	M74I/N75E/K76T/H97L/A220S/Q271E/N326S/I356T/R371I
2162	RCN11749	1208-PF-LA-CMPE-GENRE	Laos	Savannakhet	18.4952	103.768	16.5537	105.706	2018	AS-SE-E	S258L/F313S	RCN11749	M74I/N75E/K76T/H97L/A220S/Q271E/N326S/I356T/R371I
2163	RCN11751	1208-PF-LA-CMPE-GENRE	Laos	Savannakhet	18.4952	103.768	16.5537	105.706	2018	AS-SE-E	S258L/F313S	RCN11751	M74I/N75E/K76T/H97L/A220S/Q271E/N326S/I356T/R371I
2164	RCN11752	1208-PF-LA-CMPE-GENRE	Laos	Savannakhet	18.4952	103.768	16.5537	105.706	2018	AS-SE-E	S258L/F313S	RCN11752	M74I/N75E/K76T/H97L/A220S/Q271E/N326S/I356T/R371I
2166	RCN11807	1208-PF-LA-CMPE-GENRE	Laos	Salavan	18.4952	103.768	15.8484	106.274	2018	AS-SE-E	S258L/F313S	RCN11807	M74I/N75E/K76T/A220S/Q271E/R371I
2167	RCN11810	1208-PF-LA-CMPE-GENRE	Laos	Salavan	18.4952	103.768	15.8484	106.274	2018	AS-SE-E	S258L/F313S	RCN11810	M74I/N75E/K76T/A220S/Q271E/R371I
2168	RCN11849	1208-PF-LA-CMPE-GENRE	Laos	Champasak	18.4952	103.768	14.7717	105.961	2018	AS-SE-E	S258L/F313S	RCN11849	M74I/N75E/K76T/A220S/Q271E/N326S/I356T/R371I
2169	RCN11880	1208-PF-LA-CMPE-GENRE	Laos	Champasak	18.4952	103.768	14.7717	105.961	2018	AS-SE-E	S258L/F313S	RCN11880	M74I/N75E/K76T/A220S/Q271E/N326S/I356T/R371I
2170	RCN11881	1208-PF-LA-CMPE-GENRE	Laos	Champasak	18.4952	103.768	14.7717	105.961	2018	AS-SE-E	S258L/F313S	RCN11881	M74I/N75D/K76T/A144F/L148I/I194T/A220S/Q271E/T333S
2172	RCN13316	1208-PF-LA-CMPE-GENRE	Laos	Savannakhet	18.4952	103.768	16.5537	105.706	2018	AS-SE-E	S258L/F313S	RCN13316	M74I/N75E/K76T/A220S/Q271E/R371I
2173	RCN13319	1208-PF-LA-CMPE-GENRE	Laos	Savannakhet	18.4952	103.768	16.5537	105.706	2018	AS-SE-E	S258L/F313S	RCN13319	M74I/N75E/K76T/A220S/Q271E/N326S/I356T/R371I
2177	RCN13323	1208-PF-LA-CMPE-GENRE	Laos	Savannakhet	18.4952	103.768	16.5537	105.706	2018	AS-SE-E	S258L/F313S	RCN13323	M74I/N75E/K76T/A220S/Q271E/R371I
2178	RCN13329	1208-PF-LA-CMPE-GENRE	Laos	Savannakhet	18.4952	103.768	16.5537	105.706	2018	AS-SE-E	S258L/F313S	RCN13329	M74I/N75E/K76T/H97L/A220S/Q271E/N326S/I356T/R371I
2179	RCN13331	1208-PF-LA-CMPE-GENRE	Laos	Savannakhet	18.4952	103.768	16.5537	105.706	2018	AS-SE-E	S258L/F313S	RCN13331	M74I/N75E/K76T/H97L/A220S/Q271E/N326S/I356T/R371I
2181	RCN13332	1208-PF-LA-CMPE-GENRE	Laos	Savannakhet	18.4952	103.768	16.5537	105.706	2018	AS-SE-E	S258L/F313S	RCN13332	M74I/N75E/K76T/H97L/A220S/Q271E/N326S/I356T/R371I
2182	RCN13333	1208-PF-LA-CMPE-GENRE	Laos	Savannakhet	18.4952	103.768	16.5537	105.706	2018	AS-SE-E	S258L/F313S	RCN13333	M74I/N75E/K76T/H97L/A220S/Q271E/N326S/I356T/R371I
2183	RCN13336	1208-PF-LA-CMPE-GENRE	Laos	Savannakhet	18.4952	103.768	16.5537	105.706	2018	AS-SE-E	S258L/F313S	RCN13336	M74I/N75E/K76T/A220S/Q271E/R371I
2184	RCN13343	1208-PF-LA-CMPE-GENRE	Laos	Savannakhet	18.4952	103.768	16.5537	105.706	2018	AS-SE-E	S258L/F313S	RCN13343	M74I/N75E/K76T/A220S/Q271E/R371I
2185	RCN13344	1208-PF-LA-CMPE-GENRE	Laos	Savannakhet	18.4952	103.768	16.5537	105.706	2018	AS-SE-E	S258L/F313S	RCN13344	M74I/N75E/K76T/A220S/Q271E/R371I
2186	RCN13347	1208-PF-LA-CMPE-GENRE	Laos	Savannakhet	18.4952	103.768	16.5537	105.706	2018	AS-SE-E	S258L/F313S	RCN13347	M74I/N75E/K76T/A220S/Q271E/R371I
2201	RCN13368	1208-PF-LA-CMPE-GENRE	Laos	Savannakhet	18.4952	103.768	16.5537	105.706	2018	AS-SE-E	S258L/F313S	RCN13368	M74I/N75E/K76T/H97L/A220S/Q271E/N326S/I356T/R371I
2202	RCN13374	1208-PF-LA-CMPE-GENRE	Laos	Savannakhet	18.4952	103.768	16.5537	105.706	2018	AS-SE-E	S258L/F313S	RCN13374	M74I/N75E/K76T/H97L/A220S/Q271E/N326S/I356T/R371I
2203	RCN13380	1208-PF-LA-CMPE-GENRE	Laos	Savannakhet	18.4952	103.768	16.5537	105.706	2018	AS-SE-E	S258L/F313S	RCN13380	M74I/N75E/K76T/H97L/A220S/Q271E/N326S/I356T/R371I
2204	RCN13382	1208-PF-LA-CMPE-GENRE	Laos	Savannakhet	18.4952	103.768	16.5537	105.706	2018	AS-SE-E	S258L/F313S	RCN13382	M74I/N75E/K76T/H97L/A220S/Q271E/N326S/I356T/R371I
2205	RCN13389	1208-PF-LA-CMPE-GENRE	Laos	Salavan	18.4952	103.768	15.8484	106.274	2018	AS-SE-E	S258L/F313S	RCN13389	M74I/N75E/K76T/A220S/Q271E/N326S/I356T/R371I
2206	RCN13390	1208-PF-LA-CMPE-GENRE	Laos	Salavan	18.4952	103.768	15.8484	106.274	2018	AS-SE-E	S258L/F313S	RCN13390	M74I/N75E/K76T/A220S/Q271E/N326S/I356T/R371I
2279	RCN13412	1208-PF-LA-CMPE-GENRE	Laos	Salavan	18.4952	103.768	15.8484	106.274	2018	AS-SE-E	S258L/F313S	RCN13412	M74I/N75E/K76T/H97L/A220S/Q271E/N326S/I356T/R371I
3144	RCN13432	1208-PF-LA-CMPE-GENRE	Laos	Champasak	18.4952	103.768	14.7717	105.961	2018	AS-SE-E	S258L/F313S	RCN13432	M74I/N75E/K76T/A220S/Q271E/R371I
3148	RCN13433	1208-PF-LA-CMPE-GENRE	Laos	Champasak	18.4952	103.768	14.7717	105.961	2018	AS-SE-E	S258L/F313S	RCN13433	M74I/N75E/K76T/A220S/Q271E/R371I
3151	RCN13434	1208-PF-LA-CMPE-GENRE	Laos	Champasak	18.4952	103.768	14.7717	105.961	2018	AS-SE-E	S258L/F313S	RCN13434	M74I/N75E/K76T/A220S/Q271E/R371I
3152	RCN13435	1208-PF-LA-CMPE-GENRE	Laos	Champasak	18.4952	103.768	14.7717	105.961	2018	AS-SE-E	S258L/F313S	RCN13435	M74I/N75E/K76T/A220S/Q271E/R371I
3157	RCN13436	1208-PF-LA-CMPE-GENRE	Laos	Champasak	18.4952	103.768	14.7717	105.961	2018	AS-SE-E	S258L/F313S	RCN13436	M74I/N75E/K76T/A220S/Q271E/R371I
3158	RCN13446	1208-PF-LA-CMPE-GENRE	Laos	Champasak	18.4952	103.768	14.7717	105.961	2018	AS-SE-E	S258L/F313S	RCN13446	M74I/N75E/K76T/A220S/Q271E/R371I
3159	RCN13513	1208-PF-LA-CMPE-GENRE	Laos	Champasak	18.4952	103.768	14.7717	105.961	2018	AS-SE-E	S258L/F313S	RCN13513	M74I/N75E/K76T/A220S/Q271E/N326S/I356T/R371I
3161	RCN13528	1208-PF-LA-CMPE-GENRE	Laos	Attapeu	18.4952	103.768	14.7939	106.945	2018	AS-SE-E	S258L/F313S	RCN13528	M74I/N75E/K76T/A220S/Q271E/N326S/I356T/R371I
3166	RCN13531	1208-PF-LA-CMPE-GENRE	Laos	Attapeu	18.4952	103.768	14.7939	106.945	2018	AS-SE-E	S258L/F313S	RCN13531	M74I/N75D/K76T/A144F/L148I/I194T/A220S/Q271E/T333S
3167	RCN13532	1208-PF-LA-CMPE-GENRE	Laos	Attapeu	18.4952	103.768	14.7939	106.945	2018	AS-SE-E	S258L/F313S	RCN13532	M74I/N75E/K76T/A220S/Q271E/N326S/I356T/R371I
3168	RCN13533	1208-PF-LA-CMPE-GENRE	Laos	Attapeu	18.4952	103.768	14.7939	106.945	2018	AS-SE-E	S258L/F313S	RCN13533	M74I/N75E/K76T/A220S/Q271E/N326S/I356T/R371I
3170	RCN13537	1208-PF-LA-CMPE-GENRE	Laos	Attapeu	18.4952	103.768	14.7939	106.945	2018	AS-SE-E	S258L/F313S	RCN13537	M74I/N75E/K76T/A220S/Q271E/N326S/I356T/R371I
3172	RCN13538	1208-PF-LA-CMPE-GENRE	Laos	Attapeu	18.4952	103.768	14.7939	106.945	2018	AS-SE-E	S258L/F313S	RCN13538	M74I/N75E/K76T/A220S/Q271E/N326S/I356T/R371I
3174	RCN13539	1208-PF-LA-CMPE-GENRE	Laos	Attapeu	18.4952	103.768	14.7939	106.945	2018	AS-SE-E	S258L/F313S	RCN13539	M74I/N75E/K76T/A220S/Q271E/N326S/I356T/R371I
3176	RCN13540	1208-PF-LA-CMPE-GENRE	Laos	Attapeu	18.4952	103.768	14.7939	106.945	2018	AS-SE-E	S258L/F313S	RCN13540	M74I/N75E/K76T/A220S/Q271E/N326S/I356T/R371I
3178	RCN13544	1208-PF-LA-CMPE-GENRE	Laos	Attapeu	18.4952	103.768	14.7939	106.945	2018	AS-SE-E	S258L/F313S	RCN13544	M74I/N75E/K76T/A220S/Q271E/L308S/N326S/I356T/R371I
3179	RCN13553	1208-PF-LA-CMPE-GENRE	Laos	Attapeu	18.4952	103.768	14.7939	106.945	2018	AS-SE-E	S258L/F313S	RCN13553	M74I/N75E/K76T/A220S/Q271E/N326S/I356T/G367C/R371I
3180	RCN13556	1208-PF-LA-CMPE-GENRE	Laos	Attapeu	18.4952	103.768	14.7939	106.945	2018	AS-SE-E	S258L/F313S	RCN13556	M74I/N75D/K76T/A144F/L148I/I194T/A220S/Q271E/T333S
3183	RCN13559	1208-PF-LA-CMPE-GENRE	Laos	Attapeu	18.4952	103.768	14.7939	106.945	2018	AS-SE-E	S258L/F313S	RCN13559	M74I/N75E/K76T/A220S/Q271E/R371I
3184	RCN13564	1208-PF-LA-CMPE-GENRE	Laos	Attapeu	18.4952	103.768	14.7939	106.945	2018	AS-SE-E	S258L/F313S	RCN13564	M74I/N75E/K76T/A220S/Q271E/N326S/I356T/R371I
3188	RCN13579	1208-PF-LA-CMPE-GENRE	Laos	Attapeu	18.4952	103.768	14.7939	106.945	2018	AS-SE-E	S258L/F313S	RCN13579	M74I/N75E/K76T/A220S/Q271E/N326S/I356T/R371I
3189	RCN13584	1208-PF-LA-CMPE-GENRE	Laos	Sekong	18.4952	103.768	15.582	107.039	2018	AS-SE-E	S258L/F313S	RCN13584	M74I/N75E/K76T/A220S/Q271E/N326S/I356T/R371I
3190	RCN13585	1208-PF-LA-CMPE-GENRE	Laos	Sekong	18.4952	103.768	15.582	107.039	2018	AS-SE-E	S258L/F313S	RCN13585	M74I/N75E/K76T/A220S/Q271E/N326S/I356T/R371I
3191	RCN14935	1208-PF-LA-CMPE-GENRE	Laos	Savannakhet	18.4952	103.768	16.5537	105.706	2018	AS-SE-E	S258L/F313S	RCN14935	M74I/N75E/K76T/H97L/A220S/Q271E/N326S/I356T/R371I
3193	RCN14938	1208-PF-LA-CMPE-GENRE	Laos	Savannakhet	18.4952	103.768	16.5537	105.706	2018	AS-SE-E	S258L/F313S	RCN14938	M74I/N75E/K76T/A220S/Q271E/R371I
3194	RCN14940	1208-PF-LA-CMPE-GENRE	Laos	Savannakhet	18.4952	103.768	16.5537	105.706	2018	AS-SE-E	S258L/F313S	RCN14940	M74I/N75D/K76T/A144F/L148I/I194T/A220S/Q271E/T333S
3195	RCN14942	1208-PF-LA-CMPE-GENRE	Laos	Savannakhet	18.4952	103.768	16.5537	105.706	2018	AS-SE-E	S258L/F313S	RCN14942	M74I/N75D/K76T/A144F/L148I/I194T/A220S/Q271E/T333S
3196	RCN14943	1208-PF-LA-CMPE-GENRE	Laos	Savannakhet	18.4952	103.768	16.5537	105.706	2018	AS-SE-E	S258L/F313S	RCN14943	M74I/N75E/K76T/A220S/Q271E/R371I
3199	RCN14955	1208-PF-LA-CMPE-GENRE	Laos	Savannakhet	18.4952	103.768	16.5537	105.706	2018	AS-SE-E	S258L/F313S	RCN14955	M74I/N75E/K76T/A220S/Q271E/R371I
3200	RCN14969	1208-PF-LA-CMPE-GENRE	Laos	Savannakhet	18.4952	103.768	16.5537	105.706	2018	AS-SE-E	S258L/F313S	RCN14969	M74I/N75E/K76T/A220S/Q271E/R371I
3201	RCN14971	1208-PF-LA-CMPE-GENRE	Laos	Savannakhet	18.4952	103.768	16.5537	105.706	2018	AS-SE-E	S258L/F313S	RCN14971	M74I/N75E/K76T/A220S/Q271E/R371I
3203	RCN14974	1208-PF-LA-CMPE-GENRE	Laos	Savannakhet	18.4952	103.768	16.5537	105.706	2018	AS-SE-E	S258L/F313S	RCN14974	M74I/N75E/K76T/A220S/Q271E/R371I
3204	RCN14975	1208-PF-LA-CMPE-GENRE	Laos	Savannakhet	18.4952	103.768	16.5537	105.706	2018	AS-SE-E	S258L/F313S	RCN14975	M74I/N75E/K76T/A220S/Q271E/R371I
3209	RCN14976	1208-PF-LA-CMPE-GENRE	Laos	Savannakhet	18.4952	103.768	16.5537	105.706	2018	AS-SE-E	S258L/F313S	RCN14976	M74I/N75E/K76T/A220S/Q271E/R371I
3211	RCN14989	1208-PF-LA-CMPE-GENRE	Laos	Savannakhet	18.4952	103.768	16.5537	105.706	2018	AS-SE-E	S258L/F313S	RCN14989	M74I/N75E/K76T/A220S/Q271E/R371I
3212	RCN14990	1208-PF-LA-CMPE-GENRE	Laos	Savannakhet	18.4952	103.768	16.5537	105.706	2018	AS-SE-E	S258L/F313S	RCN14990	M74I/N75E/K76T/A220S/Q271E/R371I
3233	RCN14991	1208-PF-LA-CMPE-GENRE	Laos	Savannakhet	18.4952	103.768	16.5537	105.706	2018	AS-SE-E	S258L/F313S	RCN14991	M74I/N75E/K76T/A220S/Q271E/R371I
3235	RCN14992	1208-PF-LA-CMPE-GENRE	Laos	Savannakhet	18.4952	103.768	16.5537	105.706	2018	AS-SE-E	S258L/F313S	RCN14992	M74I/N75E/K76T/A220S/Q271E/R371I
3236	RCN14996	1208-PF-LA-CMPE-GENRE	Laos	Savannakhet	18.4952	103.768	16.5537	105.706	2018	AS-SE-E	S258L/F313S	RCN14996	M74I/N75E/K76T/A220S/Q271E/R371I
3272	RCN14997	1208-PF-LA-CMPE-GENRE	Laos	Savannakhet	18.4952	103.768	16.5537	105.706	2018	AS-SE-E	S258L/F313S	RCN14997	M74I/N75E/K76T/A220S/Q271E/R371I
3273	RCN14998	1208-PF-LA-CMPE-GENRE	Laos	Savannakhet	18.4952	103.768	16.5537	105.706	2018	AS-SE-E	S258L/F313S	RCN14998	M74I/N75E/K76T/A220S/Q271E/R371I
3275	RCN14999	1208-PF-LA-CMPE-GENRE	Laos	Savannakhet	18.4952	103.768	16.5537	105.706	2018	AS-SE-E	S258L/F313S	RCN14999	M74I/N75E/K76T/A220S/Q271E/R371I
3276	RCN15006	1208-PF-LA-CMPE-GENRE	Laos	Savannakhet	18.4952	103.768	16.5537	105.706	2018	AS-SE-E	S258L/F313S	RCN15006	M74I/N75E/K76T/A220S/Q271E/R371I
3281	RCN15010	1208-PF-LA-CMPE-GENRE	Laos	Savannakhet	18.4952	103.768	16.5537	105.706	2018	AS-SE-E	S258L/F313S	RCN15010	M74I/N75E/K76T/A220S/Q271E/R371I
3284	RCN15011	1208-PF-LA-CMPE-GENRE	Laos	Savannakhet	18.4952	103.768	16.5537	105.706	2018	AS-SE-E	S258L/F313S	RCN15011	M74I/N75E/K76T/A220S/Q271E/R371I
3287	RCN15021	1208-PF-LA-CMPE-GENRE	Laos	Savannakhet	18.4952	103.768	16.5537	105.706	2018	AS-SE-E	S258L/F313S	RCN15021	M74I/N75E/K76T/A220S/Q271E/R371I
3288	RCN15027	1208-PF-LA-CMPE-GENRE	Laos	Savannakhet	18.4952	103.768	16.5537	105.706	2018	AS-SE-E	S258L/F313S	RCN15027	M74I/N75E/K76T/A220S/Q271E/R371I
3291	RCN15028	1208-PF-LA-CMPE-GENRE	Laos	Savannakhet	18.4952	103.768	16.5537	105.706	2018	AS-SE-E	S258L/F313S	RCN15028	M74I/N75E/K76T/A220S/Q271E/R371I
3295	RCN15029	1208-PF-LA-CMPE-GENRE	Laos	Savannakhet	18.4952	103.768	16.5537	105.706	2018	AS-SE-E	S258L/F313S	RCN15029	M74I/N75E/K76T/A220S/Q271E/R371I
3296	RCN15063	1208-PF-LA-CMPE-GENRE	Laos	Savannakhet	18.4952	103.768	16.5537	105.706	2018	AS-SE-E	S258L/F313S	RCN15063	M74I/N75E/K76T/A220S/Q271E/R371I
3298	RCN15075	1208-PF-LA-CMPE-GENRE	Laos	Savannakhet	18.4952	103.768	16.5537	105.706	2018	AS-SE-E	S258L/F313S	RCN15075	M74I/N75E/K76T/A220S/Q271E/R371I
3300	RCN15077	1208-PF-LA-CMPE-GENRE	Laos	Savannakhet	18.4952	103.768	16.5537	105.706	2018	AS-SE-E	S258L/F313S	RCN15077	M74I/N75E/K76T/A220S/Q271E/R371I
3301	RCN15079	1208-PF-LA-CMPE-GENRE	Laos	Savannakhet	18.4952	103.768	16.5537	105.706	2018	AS-SE-E	S258L/F313S	RCN15079	M74I/N75E/K76T/A220S/Q271E/R371I
3304	RCN15184	1208-PF-LA-CMPE-GENRE	Laos	Salavan	18.4952	103.768	15.8484	106.274	2018	AS-SE-E	S258L/F313S	RCN15184	M74I/N75E/K76T/A220S/Q271E/R371I
3306	RCN15245	1208-PF-LA-CMPE-GENRE	Laos	Champasak	18.4952	103.768	14.7717	105.961	2018	AS-SE-E	S258L/F313S	RCN15245	M74I/N75E/K76T/A220S/Q271E/N326S/I356T/R371I
3310	RCN15250	1208-PF-LA-CMPE-GENRE	Laos	Champasak	18.4952	103.768	14.7717	105.961	2018	AS-SE-E	S258L/F313S	RCN15250	M74I/N75D/K76T/A144F/L148I/I194T/A220S/Q271E/T333S
3321	RCN15253	1208-PF-LA-CMPE-GENRE	Laos	Sekong	18.4952	103.768	15.582	107.039	2018	AS-SE-E	S258L/F313S	RCN15253	M74I/N75E/K76T/I194T/A220S/Q271E/R371I
3492	RCN15265	1208-PF-LA-CMPE-GENRE	Laos	Attapeu	18.4952	103.768	14.7939	106.945	2018	AS-SE-E	S258L/F313S	RCN15265	M74I/N75D/K76T/A144F/L148I/I194T/A220S/Q271E/T333S
3544	RCN15287	1208-PF-LA-CMPE-GENRE	Laos	Attapeu	18.4952	103.768	14.7939	106.945	2018	AS-SE-E	S258L/F313S	RCN15287	M74I/N75D/K76T/A144F/L148I/I194T/A220S/Q271E/T333S
3551	RCN15289	1208-PF-LA-CMPE-GENRE	Laos	Attapeu	18.4952	103.768	14.7939	106.945	2018	AS-SE-E	S258L/F313S	RCN15289	M74I/N75D/K76T/A144F/L148I/I194T/A220S/Q271E/T333S
3555	RCN15293	1208-PF-LA-CMPE-GENRE	Laos	Attapeu	18.4952	103.768	14.7939	106.945	2018	AS-SE-E	S258L/F313S	RCN15293	M74I/N75D/K76T/A144F/L148I/I194T/A220S/Q271E/T333S
3556	RCN15296	1208-PF-LA-CMPE-GENRE	Laos	Attapeu	18.4952	103.768	14.7939	106.945	2018	AS-SE-E	S258L/F313S	RCN15296	M74I/N75D/K76T/A144F/L148I/I194T/A220S/Q271E/T333S
3557	RCN15297	1208-PF-LA-CMPE-GENRE	Laos	Attapeu	18.4952	103.768	14.7939	106.945	2018	AS-SE-E	S258L/F313S	RCN15297	M74I/N75D/K76T/A144F/L148I/I194T/A220S/Q271E/T333S
3559	RCN15298	1208-PF-LA-CMPE-GENRE	Laos	Attapeu	18.4952	103.768	14.7939	106.945	2018	AS-SE-E	S258L/F313S	RCN15298	M74I/N75D/K76T/A144F/L148I/I194T/A220S/Q271E/T333S
3562	RCN15299	1208-PF-LA-CMPE-GENRE	Laos	Attapeu	18.4952	103.768	14.7939	106.945	2018	AS-SE-E	S258L/F313S	RCN15299	M74I/N75E/K76T/A220S/Q271E/N326S/I356T/R371I
3566	RCN15301	1208-PF-LA-CMPE-GENRE	Laos	Attapeu	18.4952	103.768	14.7939	106.945	2018	AS-SE-E	S258L/F313S	RCN15301	M74I/N75D/K76T/A144F/L148I/I194T/A220S/Q271E/T333S
3573	RCN15303	1208-PF-LA-CMPE-GENRE	Laos	Attapeu	18.4952	103.768	14.7939	106.945	2018	AS-SE-E	S258L/F313S	RCN15303	M74I/N75E/K76T/A220S/Q271E/N326S/I356T/R371I
3597	RCN15304	1208-PF-LA-CMPE-GENRE	Laos	Attapeu	18.4952	103.768	14.7939	106.945	2018	AS-SE-E	S258L/F313S	RCN15304	M74I/N75E/K76T/A220S/Q271E/N326S/I356T/R371I
509	RCN15306	1208-PF-LA-CMPE-GENRE	Laos	Attapeu	18.4952	103.768	14.7939	106.945	2018	AS-SE-E	S258L/F313S	RCN15306	M74I/N75E/K76T/A220S/Q271E/N326S/I356T/R371I
510	RCN15317	1208-PF-LA-CMPE-GENRE	Laos	Attapeu	18.4952	103.768	14.7939	106.945	2018	AS-SE-E	S258L/F313S	RCN15317	M74I/N75D/K76T/A144F/L148I/I194T/A220S/Q271E/T333S
511	RCN15318	1208-PF-LA-CMPE-GENRE	Laos	Attapeu	18.4952	103.768	14.7939	106.945	2018	AS-SE-E	S258L/F313S	RCN15318	M74I/N75D/K76T/A144F/L148I/I194T/A220S/Q271E/T333S
512	RCN15320	1208-PF-LA-CMPE-GENRE	Laos	Attapeu	18.4952	103.768	14.7939	106.945	2018	AS-SE-E	S258L/F313S	RCN15320	M74I/N75D/K76T/A144F/L148I/I194T/A220S/Q271E/T333S
513	RCN15321	1208-PF-LA-CMPE-GENRE	Laos	Attapeu	18.4952	103.768	14.7939	106.945	2018	AS-SE-E	S258L/F313S	RCN15321	M74I/N75D/K76T/A144F/L148I/I194T/A220S/Q271E/T333S
514	RCN15323	1208-PF-LA-CMPE-GENRE	Laos	Attapeu	18.4952	103.768	14.7939	106.945	2018	AS-SE-E	S258L/F313S	RCN15323	M74I/N75E/K76T/A220S/Q271E/N326S/I356T/R371I
519	RCN15325	1208-PF-LA-CMPE-GENRE	Laos	Attapeu	18.4952	103.768	14.7939	106.945	2018	AS-SE-E	S258L/F313S	RCN15325	M74I/N75E/K76T/A220S/Q271E/N326S/I356T/R371I
538	RCN15331	1208-PF-LA-CMPE-GENRE	Laos	Attapeu	18.4952	103.768	14.7939	106.945	2018	AS-SE-E	S258L/F313S	RCN15331	M74I/N75E/K76T/A220S/Q271E/N326S/I356T/R371I
539	RCN15332	1208-PF-LA-CMPE-GENRE	Laos	Attapeu	18.4952	103.768	14.7939	106.945	2018	AS-SE-E	S258L/F313S	RCN15332	M74I/N75D/K76T/A144F/L148I/I194T/A220S/Q271E/T333S
540	RCN15340	1208-PF-LA-CMPE-GENRE	Laos	Attapeu	18.4952	103.768	14.7939	106.945	2018	AS-SE-E	S258L/F313S	RCN15340	M74I/N75E/K76T/A220S/Q271E/N326S/I356T/R371I
545	RCN15341	1208-PF-LA-CMPE-GENRE	Laos	Attapeu	18.4952	103.768	14.7939	106.945	2018	AS-SE-E	S258L/F313S	RCN15341	M74I/N75D/K76T/A144F/L148I/I194T/A220S/Q271E/T333S
547	RCN15345	1208-PF-LA-CMPE-GENRE	Laos	Attapeu	18.4952	103.768	14.7939	106.945	2018	AS-SE-E	S258L/F313S	RCN15345	M74I/N75D/K76T/A144F/L148I/I194T/A220S/Q271E/T333S
548	RCN15346	1208-PF-LA-CMPE-GENRE	Laos	Attapeu	18.4952	103.768	14.7939	106.945	2018	AS-SE-E	S258L/F313S	RCN15346	M74I/N75D/K76T/A144F/L148I/I194T/A220S/Q271E/T333S
551	RCN15352	1208-PF-LA-CMPE-GENRE	Laos	Attapeu	18.4952	103.768	14.7939	106.945	2018	AS-SE-E	S258L/F313S	RCN15352	M74I/N75D/K76T/A144F/L148I/I194T/A220S/Q271E/T333S
552	RCN15356	1208-PF-LA-CMPE-GENRE	Laos	Attapeu	18.4952	103.768	14.7939	106.945	2018	AS-SE-E	S258L/F313S	RCN15356	M74I/N75D/K76T/A144F/L148I/I194T/A220S/Q271E/T333S
553	RCN15357	1208-PF-LA-CMPE-GENRE	Laos	Attapeu	18.4952	103.768	14.7939	106.945	2018	AS-SE-E	S258L/F313S	RCN15357	M74I/N75D/K76T/A144F/L148I/I194T/A220S/Q271E/T333S
554	RCN15360	1208-PF-LA-CMPE-GENRE	Laos	Attapeu	18.4952	103.768	14.7939	106.945	2018	AS-SE-E	S258L/F313S	RCN15360	M74I/N75E/K76T/A220S/Q271E/R371I
555	RCN15362	1208-PF-LA-CMPE-GENRE	Laos	Attapeu	18.4952	103.768	14.7939	106.945	2018	AS-SE-E	S258L/F313S	RCN15362	M74I/N75D/K76T/A144F/L148I/I194T/A220S/Q271E/T333S
559	RCN15363	1208-PF-LA-CMPE-GENRE	Laos	Attapeu	18.4952	103.768	14.7939	106.945	2018	AS-SE-E	S258L/F313S	RCN15363	M74I/N75D/K76T/A144F/L148I/I194T/A220S/Q271E/T333S
561	RCN15364	1208-PF-LA-CMPE-GENRE	Laos	Attapeu	18.4952	103.768	14.7939	106.945	2018	AS-SE-E	S258L/F313S	RCN15364	M74I/N75D/K76T/A144F/L148I/I194T/A220S/Q271E/T333S
563	RCN15365	1208-PF-LA-CMPE-GENRE	Laos	Attapeu	18.4952	103.768	14.7939	106.945	2018	AS-SE-E	S258L/F313S	RCN15365	M74I/N75D/K76T/A144F/L148I/I194T/A220S/Q271E/T333S
564	RCN15366	1208-PF-LA-CMPE-GENRE	Laos	Attapeu	18.4952	103.768	14.7939	106.945	2018	AS-SE-E	S258L/F313S	RCN15366	M74I/N75D/K76T/A144F/L148I/I194T/A220S/Q271E/T333S
565	RCN15369	1208-PF-LA-CMPE-GENRE	Laos	Attapeu	18.4952	103.768	14.7939	106.945	2018	AS-SE-E	S258L/F313S	RCN15369	M74I/N75D/K76T/A144F/L148I/I194T/A220S/Q271E/T333S
567	RCN15370	1208-PF-LA-CMPE-GENRE	Laos	Attapeu	18.4952	103.768	14.7939	106.945	2018	AS-SE-E	S258L/F313S	RCN15370	M74I/N75D/K76T/A144F/L148I/I194T/A220S/Q271E/T333S
571	RCN15372	1208-PF-LA-CMPE-GENRE	Laos	Attapeu	18.4952	103.768	14.7939	106.945	2018	AS-SE-E	S258L/F313S	RCN15372	M74I/N75D/K76T/A144F/L148I/I194T/A220S/Q271E/T333S
572	RCN15373	1208-PF-LA-CMPE-GENRE	Laos	Attapeu	18.4952	103.768	14.7939	106.945	2018	AS-SE-E	S258L/F313S	RCN15373	M74I/N75D/K76T/A144F/L148I/I194T/A220S/Q271E/T333S
573	RCN15374	1208-PF-LA-CMPE-GENRE	Laos	Attapeu	18.4952	103.768	14.7939	106.945	2018	AS-SE-E	S258L/F313S	RCN15374	M74I/N75D/K76T/A144F/L148I/I194T/A220S/Q271E/T333S
574	RCN15379	1208-PF-LA-CMPE-GENRE	Laos	Attapeu	18.4952	103.768	14.7939	106.945	2018	AS-SE-E	S258L/F313S	RCN15379	M74I/N75D/K76T/A144F/L148I/I194T/A220S/Q271E/T333S
575	RCN15380	1208-PF-LA-CMPE-GENRE	Laos	Attapeu	18.4952	103.768	14.7939	106.945	2018	AS-SE-E	S258L/F313S	RCN15380	M74I/N75D/K76T/A144F/L148I/I194T/A220S/Q271E/T333S
577	RCN15381	1208-PF-LA-CMPE-GENRE	Laos	Attapeu	18.4952	103.768	14.7939	106.945	2018	AS-SE-E	S258L/F313S	RCN15381	M74I/N75D/K76T/A144F/L148I/I194T/A220S/Q271E/T333S
578	RCN15382	1208-PF-LA-CMPE-GENRE	Laos	Attapeu	18.4952	103.768	14.7939	106.945	2018	AS-SE-E	S258L/F313S	RCN15382	M74I/N75D/K76T/A144F/L148I/I194T/A220S/Q271E/T333S
579	RCN15386	1208-PF-LA-CMPE-GENRE	Laos	Attapeu	18.4952	103.768	14.7939	106.945	2018	AS-SE-E	S258L/F313S	RCN15386	M74I/N75D/K76T/A144F/L148I/I194T/A220S/Q271E/T333S
580	RCN15387	1208-PF-LA-CMPE-GENRE	Laos	Attapeu	18.4952	103.768	14.7939	106.945	2018	AS-SE-E	S258L/F313S	RCN15387	M74I/N75D/K76T/A144F/L148I/I194T/A220S/Q271E/T333S
581	RCN25246	1208-PF-LA-CMPE-GENRE	Laos	Attapeu	18.4952	103.768	14.7939	106.945	2018	AS-SE-E	S258L/F313S	RCN25246	M74I/N75D/K76T/A144F/L148I/I194T/A220S/Q271E/T333S
587	RCN25317	1208-PF-LA-CMPE-GENRE	Laos	Attapeu	18.4952	103.768	14.7939	106.945	2018	AS-SE-E	S258L/F313S	RCN25317	M74I/N75D/K76T/A144F/L148I/I194T/A220S/Q271E/T333S
588	RCN25318	1208-PF-LA-CMPE-GENRE	Laos	Attapeu	18.4952	103.768	14.7939	106.945	2018	AS-SE-E	S258L/F313S	RCN25318	M74I/N75D/K76T/A144F/L148I/I194T/A220S/Q271E/T333S
589	RCN25190	1208-PF-LA-CMPE-GENRE	Laos	Champasak	18.4952	103.768	14.7717	105.961	2019	AS-SE-E	S258L/F313S	RCN25190	M74I/N75E/K76T/A220S/Q271E/N326S/I356T/R371I
590	RCN25223	1208-PF-LA-CMPE-GENRE	Laos	Champasak	18.4952	103.768	14.7717	105.961	2019	AS-SE-E	S258L/F313S	RCN25223	M74I/N75E/K76T/A220S/Q271E/N326S/I356T/R371I
591	RCN25252	1208-PF-LA-CMPE-GENRE	Laos	Attapeu	18.4952	103.768	14.7939	106.945	2019	AS-SE-E	S258L/F313S	RCN25252	M74I/N75E/K76T/A220S/Q271E/N326S/I356T/R371I
592	RCN25257	1208-PF-LA-CMPE-GENRE	Laos	Champasak	18.4952	103.768	14.7717	105.961	2019	AS-SE-E	S258L/F313S	RCN25257	M74I/N75E/K76T/A220S/Q271E/N326S/I356T/R371I
600	RCN25272	1208-PF-LA-CMPE-GENRE	Laos	Attapeu	18.4952	103.768	14.7939	106.945	2019	AS-SE-E	S258L/F313S	RCN25272	M74I/N75E/K76T/A220S/Q271E/N326S/I356T/R371I
601	RCN25851	1208-PF-LA-CMPE-GENRE	Laos	Savannakhet	18.4952	103.768	16.5537	105.706	2019	AS-SE-E	S258L/F313S	RCN25851	M74I/N75E/K76T/A220S/Q271E/R371I
602	RCN25936	1208-PF-LA-CMPE-GENRE	Laos	Attapeu	18.4952	103.768	14.7939	106.945	2019	AS-SE-E	S258L/F313S	RCN25936	M74I/N75D/K76T/A144F/L148I/I194T/A220S/Q271E/T333S
605	RCN25939	1208-PF-LA-CMPE-GENRE	Laos	Attapeu	18.4952	103.768	14.7939	106.945	2019	AS-SE-E	S258L/F313S	RCN25939	M74I/N75E/K76T/A220S/Q271E/N326S/I356T/R371I
606	RCN25946	1208-PF-LA-CMPE-GENRE	Laos	Attapeu	18.4952	103.768	14.7939	106.945	2019	AS-SE-E	S258L/F313S	RCN25946	M74I/N75E/K76T/T93S/A220S/Q271E/N326S/I356T/R371I
608	RCN25951	1208-PF-LA-CMPE-GENRE	Laos	Savannakhet	18.4952	103.768	16.5537	105.706	2019	AS-SE-E	S258L/F313S	RCN25951	M74I/N75E/K76T/A220S/Q271E/R371I
609	RCN26001	1208-PF-LA-CMPE-GENRE	Laos	Champasak	18.4952	103.768	14.7717	105.961	2019	AS-SE-E	S258L/F313S	RCN26001	M74I/N75E/K76T/A220S/Q271E/N326S/I356T/R371I
610	RCN26002	1208-PF-LA-CMPE-GENRE	Laos	Attapeu	18.4952	103.768	14.7939	106.945	2019	AS-SE-E	S258L/F313S	RCN26002	M74I/N75D/K76T/A144F/L148I/I194T/A220S/Q271E/T333S
611	RCN26028	1208-PF-LA-CMPE-GENRE	Laos	Attapeu	18.4952	103.768	14.7939	106.945	2019	AS-SE-E	S258L/F313S	RCN26028	M74I/N75E/K76T/T93S/A220S/Q271E/N326S/I356T/R371I
612	RCN26574	1208-PF-LA-CMPE-GENRE	Laos	Attapeu	18.4952	103.768	14.7939	106.945	2020	AS-SE-E	S258L/F313S	RCN26574	M74I/N75E/K76T/A220S/Q271E/N326S/I356T/R371I
613	RCN26582	1208-PF-LA-CMPE-GENRE	Laos	Attapeu	18.4952	103.768	14.7939	106.945	2020	AS-SE-E	S258L/F313S	RCN26582	M74I/N75E/K76T/A220S/Q271E/N326S/I356T/R371I
653	RCN26592	1208-PF-LA-CMPE-GENRE	Laos	Attapeu	18.4952	103.768	14.7939	106.945	2020	AS-SE-E	S258L/F313S	RCN26592	M74I/N75E/K76T/A220S/Q271E/N326S/I356T/R371I
654	RCN26596	1208-PF-LA-CMPE-GENRE	Laos	Attapeu	18.4952	103.768	14.7939	106.945	2020	AS-SE-E	S258L/F313S	RCN26596	M74I/N75E/K76T/A220S/Q271E/N326S/I356T/R371I
656	RCN26599	1208-PF-LA-CMPE-GENRE	Laos	Attapeu	18.4952	103.768	14.7939	106.945	2020	AS-SE-E	S258L/F313S	RCN26599	M74I/N75E/K76T/T93S/A220S/Q271E/N326S/I356T/R371I
657	RCN26620	1208-PF-LA-CMPE-GENRE	Laos	Attapeu	18.4952	103.768	14.7939	106.945	2020	AS-SE-E	S258L/F313S	RCN26620	M74I/N75E/K76T/A220S/Q271E/N326S/I356T/R371I
867	RCN26647	1208-PF-LA-CMPE-GENRE	Laos	Attapeu	18.4952	103.768	14.7939	106.945	2020	AS-SE-E	S258L/F313S	RCN26647	M74I/N75E/K76T/A220S/Q271E/N326S/I356T/R371I
868	RCN26648	1208-PF-LA-CMPE-GENRE	Laos	Attapeu	18.4952	103.768	14.7939	106.945	2020	AS-SE-E	S258L/F313S	RCN26648	M74I/N75E/K76T/A220S/Q271E/N326S/I356T/R371I
869	RCN26655	1208-PF-LA-CMPE-GENRE	Laos	Attapeu	18.4952	103.768	14.7939	106.945	2020	AS-SE-E	S258L/F313S	RCN26655	M74I/N75E/K76T/A220S/Q271E/N326S/I356T/R371I
871	RCN26656	1208-PF-LA-CMPE-GENRE	Laos	Attapeu	18.4952	103.768	14.7939	106.945	2020	AS-SE-E	S258L/F313S	RCN26656	M74I/N75D/K76T/A144F/L148I/I194T/A220S/Q271E/T333S
872	RCN26664	1208-PF-LA-CMPE-GENRE	Laos	Attapeu	18.4952	103.768	14.7939	106.945	2020	AS-SE-E	S258L/F313S	RCN26664	M74I/N75E/K76T/A220S/Q271E/N326S/I356T/R371I
875	RCN26666	1208-PF-LA-CMPE-GENRE	Laos	Attapeu	18.4952	103.768	14.7939	106.945	2020	AS-SE-E	S258L/F313S	RCN26666	M74I/N75E/K76T/A220S/Q271E/N326S/I356T/R371I
876	RCN26670	1208-PF-LA-CMPE-GENRE	Laos	Attapeu	18.4952	103.768	14.7939	106.945	2020	AS-SE-E	S258L/F313S	RCN26670	M74I/N75E/K76T/T93S/A220S/Q271E/N326S/I356T/R371I
2187	RCN26673	1208-PF-LA-CMPE-GENRE	Laos	Attapeu	18.4952	103.768	14.7939	106.945	2020	AS-SE-E	S258L/F313S	RCN26673	M74I/N75E/K76T/A220S/Q271E/N326S/I356T/R371I
2188	RCN26678	1208-PF-LA-CMPE-GENRE	Laos	Attapeu	18.4952	103.768	14.7939	106.945	2020	AS-SE-E	S258L/F313S	RCN26678	M74I/N75E/K76T/A220S/Q271E/N326S/I356T/R371I
2190	RCN26679	1208-PF-LA-CMPE-GENRE	Laos	Attapeu	18.4952	103.768	14.7939	106.945	2020	AS-SE-E	S258L/F313S	RCN26679	M74I/N75E/K76T/A220S/Q271E/N326S/I356T/R371I
2191	RCN26680	1208-PF-LA-CMPE-GENRE	Laos	Attapeu	18.4952	103.768	14.7939	106.945	2020	AS-SE-E	S258L/F313S	RCN26680	M74I/N75E/K76T/A220S/Q271E/N326S/I356T/R371I
2192	RCN26681	1208-PF-LA-CMPE-GENRE	Laos	Attapeu	18.4952	103.768	14.7939	106.945	2020	AS-SE-E	S258L/F313S	RCN26681	M74I/N75E/K76T/A220S/Q271E/N326S/I356T/R371I
2195	RCN26683	1208-PF-LA-CMPE-GENRE	Laos	Attapeu	18.4952	103.768	14.7939	106.945	2020	AS-SE-E	S258L/F313S	RCN26683	M74I/N75E/K76T/A220S/Q271E/N326S/I356T/R371I
2200	RCN26703	1208-PF-LA-CMPE-GENRE	Laos	Attapeu	18.4952	103.768	14.7939	106.945	2020	AS-SE-E	S258L/F313S	RCN26703	M74I/N75E/K76T/A220S/Q271E/N326S/I356T/R371I
2207	RCN26728	1208-PF-LA-CMPE-GENRE	Laos	Savannakhet	18.4952	103.768	16.5537	105.706	2020	AS-SE-E	S258L/F313S	RCN26728	M74I/N75E/K76T/A220S/Q271E/N326S/I356T/R371I
2208	RCN26767	1208-PF-LA-CMPE-GENRE	Laos	Attapeu	18.4952	103.768	14.7939	106.945	2020	AS-SE-E	S258L/F313S	RCN26767	M74I/N75E/K76T/A220S/Q271E/N326S/I356T/R371I
2209	RCN26781	1208-PF-LA-CMPE-GENRE	Laos	Attapeu	18.4952	103.768	14.7939	106.945	2020	AS-SE-E	S258L/F313S	RCN26781	M74I/N75E/K76T/A220S/Q271E/N326S/I356T/R371I
2210	RCN26782	1208-PF-LA-CMPE-GENRE	Laos	Attapeu	18.4952	103.768	14.7939	106.945	2020	AS-SE-E	S258L/F313S	RCN26782	M74I/N75E/K76T/A220S/Q271E/N326S/I356T/R371I
2211	RCN26804	1208-PF-LA-CMPE-GENRE	Laos	Attapeu	18.4952	103.768	14.7939	106.945	2020	AS-SE-E	S258L/F313S	RCN26804	M74I/N75E/K76T/A220S/Q271E/N326S/I356T/R371I
2212	RCN26820	1208-PF-LA-CMPE-GENRE	Laos	Attapeu	18.4952	103.768	14.7939	106.945	2020	AS-SE-E	S258L/F313S	RCN26820	M74I/N75E/K76T/A220S/Q271E/N326S/I356T/R371I
2214	RCN26852	1208-PF-LA-CMPE-GENRE	Laos	Attapeu	18.4952	103.768	14.7939	106.945	2020	AS-SE-E	S258L/F313S	RCN26852	M74I/N75E/K76T/A220S/Q271E/N326S/I356T/R371I
2215	RCN26853	1208-PF-LA-CMPE-GENRE	Laos	Attapeu	18.4952	103.768	14.7939	106.945	2020	AS-SE-E	S258L/F313S	RCN26853	M74I/N75E/K76T/A220S/Q271E/N326S/I356T/R371I
2216	RCN26861	1208-PF-LA-CMPE-GENRE	Laos	Attapeu	18.4952	103.768	14.7939	106.945	2020	AS-SE-E	S258L/F313S	RCN26861	M74I/N75E/K76T/A220S/Q271E/N326S/I356T/R371I
2217	RCN26945	1208-PF-LA-CMPE-GENRE	Laos	Attapeu	18.4952	103.768	14.7939	106.945	2020	AS-SE-E	S258L/F313S	RCN26945	M74I/N75E/K76T/A220S/Q271E/N326S/I356T/R371I
2218	RCN26950	1208-PF-LA-CMPE-GENRE	Laos	Attapeu	18.4952	103.768	14.7939	106.945	2020	AS-SE-E	S258L/F313S	RCN26950	M74I/N75E/K76T/A220S/Q271E/N326S/I356T/R371I
2220	RCN26952	1208-PF-LA-CMPE-GENRE	Laos	Attapeu	18.4952	103.768	14.7939	106.945	2020	AS-SE-E	S258L/F313S	RCN26952	M74I/N75E/K76T/A220S/Q271E/N326S/I356T/R371I
2221	RCN26953	1208-PF-LA-CMPE-GENRE	Laos	Attapeu	18.4952	103.768	14.7939	106.945	2020	AS-SE-E	S258L/F313S	RCN26953	M74I/N75E/K76T/A220S/Q271E/N326S/I356T/R371I
2222	RCN26958	1208-PF-LA-CMPE-GENRE	Laos	Attapeu	18.4952	103.768	14.7939	106.945	2020	AS-SE-E	S258L/F313S	RCN26958	M74I/N75E/K76T/A220S/Q271E/N326S/I356T/R371I
2223	RCN26637	1208-PF-LA-CMPE-GENRE	Laos	Attapeu	18.4952	103.768	14.7939	106.945	2021	AS-SE-E	S258L/F313S	RCN26637	M74I/N75E/K76T/A220S/Q271E/N326S/I356T/R371I
2226	RCN26675	1208-PF-LA-CMPE-GENRE	Laos	Attapeu	18.4952	103.768	14.7939	106.945	2021	AS-SE-E	S258L/F313S	RCN26675	M74I/N75E/K76T/A220S/Q271E/N326S/I356T/R371I
2227	RCN26791	1208-PF-LA-CMPE-GENRE	Laos	Attapeu	18.4952	103.768	14.7939	106.945	2021	AS-SE-E	S258L/F313S	RCN26791	M74I/N75E/K76T/A220S/Q271E/N326S/I356T/R371I
2228	RCN26932	1208-PF-LA-CMPE-GENRE	Laos	Attapeu	18.4952	103.768	14.7939	106.945	2021	AS-SE-E	S258L/F313S	RCN26932	M74I/N75E/K76T/A220S/Q271E/N326S/I356T/R371I
2229	RCN26937	1208-PF-LA-CMPE-GENRE	Laos	Attapeu	18.4952	103.768	14.7939	106.945	2021	AS-SE-E	S258L/F313S	RCN26937	M74I/N75E/K76T/A220S/Q271E/N326S/I356T/R371I
2230	RCN26946	1208-PF-LA-CMPE-GENRE	Laos	Attapeu	18.4952	103.768	14.7939	106.945	2021	AS-SE-E	S258L/F313S	RCN26946	M74I/N75E/K76T/A220S/Q271E/N326S/I356T/R371I
2231	RCN26960	1208-PF-LA-CMPE-GENRE	Laos	Attapeu	18.4952	103.768	14.7939	106.945	2021	AS-SE-E	S258L/F313S	RCN26960	M74I/N75E/K76T/A220S/Q271E/N326S/I356T/R371I
2232	RCN11537	1208-PF-LA-CMPE-GENRE	Laos	Savannakhet	18.4952	103.768	16.5537	105.706	2017	AS-SE-E	S258L/F313S	RCN11537
2233	RCN11550	1208-PF-LA-CMPE-GENRE	Laos	Savannakhet	18.4952	103.768	16.5537	105.706	2017	AS-SE-E	S258L/F313S	RCN11550
2234	RCN11570	1208-PF-LA-CMPE-GENRE	Laos	Savannakhet	18.4952	103.768	16.5537	105.706	2017	AS-SE-E	S258L/F313S	RCN11570
2235	RCN11499	1208-PF-LA-CMPE-GENRE	Laos	Savannakhet	18.4952	103.768	16.5537	105.706	2018	AS-SE-E	S258L/F313S	RCN11499
2237	RCN13342	1208-PF-LA-CMPE-GENRE	Laos	Savannakhet	18.4952	103.768	16.5537	105.706	2018	AS-SE-E	S258L/F313S	RCN13342
2239	RCN15003	1208-PF-LA-CMPE-GENRE	Laos	Savannakhet	18.4952	103.768	16.5537	105.706	2018	AS-SE-E	S258L/F313S	RCN15003
2240	RCN15013	1208-PF-LA-CMPE-GENRE	Laos	Savannakhet	18.4952	103.768	16.5537	105.706	2018	AS-SE-E	S258L/F313S	RCN15013
2242	RCN15019	1208-PF-LA-CMPE-GENRE	Laos	Savannakhet	18.4952	103.768	16.5537	105.706	2018	AS-SE-E	S258L/F313S	RCN15019
2243	RCN25882	1208-PF-LA-CMPE-GENRE	Laos	Salavan	18.4952	103.768	15.8484	106.274	2019	AS-SE-E	S258L/F313S	RCN25882
2247	RCN25968	1208-PF-LA-CMPE-GENRE	Laos	Savannakhet	18.4952	103.768	16.5537	105.706	2019	AS-SE-E	S258L/F313S	RCN25968
2249	RCN25971	1208-PF-LA-CMPE-GENRE	Laos	Savannakhet	18.4952	103.768	16.5537	105.706	2019	AS-SE-E	S258L/F313S	RCN25971
2250	RCN25982	1208-PF-LA-CMPE-GENRE	Laos	Savannakhet	18.4952	103.768	16.5537	105.706	2019	AS-SE-E	S258L/F313S	RCN25982
2251	RCN25990	1208-PF-LA-CMPE-GENRE	Laos	Savannakhet	18.4952	103.768	16.5537	105.706	2019	AS-SE-E	S258L/F313S	RCN25990
2252	RCN25992	1208-PF-LA-CMPE-GENRE	Laos	Savannakhet	18.4952	103.768	16.5537	105.706	2019	AS-SE-E	S258L/F313S	RCN25992
2253	RCN25995	1208-PF-LA-CMPE-GENRE	Laos	Savannakhet	18.4952	103.768	16.5537	105.706	2019	AS-SE-E	S258L/F313S	RCN25995
2254	RCN26009	1208-PF-LA-CMPE-GENRE	Laos	Savannakhet	18.4952	103.768	16.5537	105.706	2019	AS-SE-E	S258L/F313S	RCN26009
2258	RCN26018	1208-PF-LA-CMPE-GENRE	Laos	Savannakhet	18.4952	103.768	16.5537	105.706	2019	AS-SE-E	S258L/F313S	RCN26018
2259	RCN26023	1208-PF-LA-CMPE-GENRE	Laos	Savannakhet	18.4952	103.768	16.5537	105.706	2019	AS-SE-E	S258L/F313S	RCN26023
2260	QC0112-C	1008-PF-SEA-RINGWALD	Myanmar	Tanintharyi	21.1171	96.5102	12.6615	98.7452	2011	AS-SE-W	S258L/F313S	QC0112-C	M74I/N75E/K76T/A220S/Q271E/N326S/I356T/R371I
2265	QC0113-C	1008-PF-SEA-RINGWALD	Myanmar	Tanintharyi	21.1171	96.5102	12.6615	98.7452	2011	AS-SE-W	S258L/F313S	QC0113-C	M74I/N75E/K76T/A220S/Q271E/N326S/I356T/R371I
2266	QC0115-C	1008-PF-SEA-RINGWALD	Myanmar	Tanintharyi	21.1171	96.5102	12.6615	98.7452	2011	AS-SE-W	S258L/F313S	QC0115-C	M74I/N75E/K76T/A220S/Q271E/N326S/I356T/R371I
2267	QC0118-C	1008-PF-SEA-RINGWALD	Myanmar	Tanintharyi	21.1171	96.5102	12.6615	98.7452	2011	AS-SE-W	S258L/F313S	QC0118-C	M74I/N75E/K76T/A220S/Q271E/N326S/I356T/R371I
2268	QC0123-C	1008-PF-SEA-RINGWALD	Myanmar	Tanintharyi	21.1171	96.5102	12.6615	98.7452	2011	AS-SE-W	S258L/F313S	QC0123-C	M74I/N75E/K76T/A220S/Q271E/N326S/I356T/R371I
2269	QC0127-C	1008-PF-SEA-RINGWALD	Myanmar	Tanintharyi	21.1171	96.5102	12.6615	98.7452	2011	AS-SE-W	S258L/F313S	QC0127-C	M74I/N75E/K76T/A220S/Q271E/N326S/I356T/R371I
2272	QC0130-C	1008-PF-SEA-RINGWALD	Myanmar	Tanintharyi	21.1171	96.5102	12.6615	98.7452	2011	AS-SE-W	S258L/F313S	QC0130-C	M74I/N75E/K76T/A220S/Q271E/N326S/I356T/R371I
2276	QC0131-C	1008-PF-SEA-RINGWALD	Myanmar	Tanintharyi	21.1171	96.5102	12.6615	98.7452	2011	AS-SE-W	S258L/F313S	QC0131-C	M74I/N75E/K76T/A220S/Q271E/N326S/I356T/R371I
2277	QC0136-C	1008-PF-SEA-RINGWALD	Myanmar	Tanintharyi	21.1171	96.5102	12.6615	98.7452	2011	AS-SE-W	S258L/F313S	QC0136-C	M74I/N75E/K76T/A220S/Q271E/N326S/I356T/R371I
2278	QC0140-C	1008-PF-SEA-RINGWALD	Myanmar	Tanintharyi	21.1171	96.5102	12.6615	98.7452	2011	AS-SE-W	S258L/F313S	QC0140-C	M74I/N75E/K76T/A220S/Q271E/N326S/I356T/R371I
2321	QC0141-C	1008-PF-SEA-RINGWALD	Myanmar	Tanintharyi	21.1171	96.5102	12.6615	98.7452	2011	AS-SE-W	S258L/F313S	QC0141-C	M74I/N75E/K76T/A220S/Q271E/N326S/I356T/R371I
2323	QC0144-C	1008-PF-SEA-RINGWALD	Myanmar	Tanintharyi	21.1171	96.5102	12.6615	98.7452	2011	AS-SE-W	S258L/F313S	QC0144-C	M74I/N75E/K76T/A220S/Q271E/N326S/I356T/R371I
3214	QC0149-C	1008-PF-SEA-RINGWALD	Myanmar	Tanintharyi	21.1171	96.5102	12.6615	98.7452	2011	AS-SE-W	S258L/F313S	QC0149-C	M74I/N75E/K76T/A220S/Q271E/N326S/I356T/R371I
3215	QC0150-C	1008-PF-SEA-RINGWALD	Myanmar	Tanintharyi	21.1171	96.5102	12.6615	98.7452	2011	AS-SE-W	S258L/F313S	QC0150-C	M74I/N75E/K76T/A220S/Q271E/N326S/I356T/R371I
3218	QC0153-C	1008-PF-SEA-RINGWALD	Myanmar	Tanintharyi	21.1171	96.5102	12.6615	98.7452	2011	AS-SE-W	S258L/F313S	QC0153-C	M74I/N75E/K76T/A220S/Q271E/N326S/I356T/R371I
3219	QC0156-C	1008-PF-SEA-RINGWALD	Myanmar	Tanintharyi	21.1171	96.5102	12.6615	98.7452	2011	AS-SE-W	S258L/F313S	QC0156-C	M74I/N75E/K76T/A220S/Q271E/N326S/I356T/R371I
3220	QC0161-C	1008-PF-SEA-RINGWALD	Myanmar	Tanintharyi	21.1171	96.5102	12.6615	98.7452	2011	AS-SE-W	S258L/F313S	QC0161-C	M74I/N75E/K76T/A220S/Q271E/N326S/I356T/R371I
3222	QC0172-C	1052-PF-TRAC-WHITE	Myanmar	Bago	21.1171	96.5102	18.2982	96.1308	2011	AS-SE-W	S258L/F313S	QC0172-C	M74I/N75E/K76T/A220S/Q271E/N326S/I356T/R371I
3223	QC0548-CW	1149-PF-MM-RINGWALD	Myanmar	Shan	21.1171	96.5102	21.722	98.1269	2011	AS-SE-W	S258L/F313S	QC0548-CW	M74I/N75E/K76T/A220S/Q271E/N326S/I356T/R371I
3224	QC0189-C	1052-PF-TRAC-WHITE	Myanmar	Bago	21.1171	96.5102	18.2982	96.1308	2012	AS-SE-W	S258L/F313S	QC0189-C	M74I/N75E/K76T/A220S/Q271E/N326S/I356T/R371I
3226	QC0193-C	1052-PF-TRAC-WHITE	Myanmar	Bago	21.1171	96.5102	18.2982	96.1308	2012	AS-SE-W	S258L/F313S	QC0193-C	M74I/N75E/K76T/A220S/Q271E/N326S/I356T/R371I
3237	QC0196-C	1052-PF-TRAC-WHITE	Myanmar	Bago	21.1171	96.5102	18.2982	96.1308	2012	AS-SE-W	S258L/F313S	QC0196-C	M74I/N75E/K76T/A220S/Q271E/N326S/I356T/R371I
3332	QC0198-C	1052-PF-TRAC-WHITE	Myanmar	Bago	21.1171	96.5102	18.2982	96.1308	2012	AS-SE-W	S258L/F313S	QC0198-C	M74I/N75E/K76T/A220S/Q271E/N326S/I356T/R371I
3333	QC0207-C	1052-PF-TRAC-WHITE	Myanmar	Bago	21.1171	96.5102	18.2982	96.1308	2012	AS-SE-W	S258L/F313S	QC0207-C	M74I/N75E/K76T/A220S/Q271E/N326S/I356T/R371I
3336	QC0211-C	1052-PF-TRAC-WHITE	Myanmar	Bago	21.1171	96.5102	18.2982	96.1308	2012	AS-SE-W	S258L/F313S	QC0211-C	M74I/N75E/K76T/A220S/Q271E/N326S/I356T/R371I
3337	QC0212-C	1052-PF-TRAC-WHITE	Myanmar	Bago	21.1171	96.5102	18.2982	96.1308	2012	AS-SE-W	S258L/F313S	QC0212-C	M74I/N75E/K76T/A220S/Q271E/N326S/I356T/R371I
3344	QC0399-CW	1149-PF-MM-RINGWALD	Myanmar	Sagaing	21.1171	96.5102	24.1421	95.3365	2012	AS-SE-W	S258L/F313S	QC0399-CW	M74I/N75E/K76T/A220S/Q271E/N326S/I356T/R371I
3347	QC0477-CW	1149-PF-MM-RINGWALD	Myanmar	Sagaing	21.1171	96.5102	24.1421	95.3365	2012	AS-SE-W	S258L/F313S	QC0477-CW	M74I/N75E/K76T/A220S/Q271E/N326S/I356T/R371I
3348	QC0551-CW	1149-PF-MM-RINGWALD	Myanmar	Shan	21.1171	96.5102	21.722	98.1269	2012	AS-SE-W	S258L/F313S	QC0551-CW	M74I/N75E/K76T/A220S/Q271E/N326S/I356T/R371I
3455	QC0554-CW	1149-PF-MM-RINGWALD	Myanmar	Shan	21.1171	96.5102	21.722	98.1269	2012	AS-SE-W	S258L/F313S	QC0554-CW	M74I/N75E/K76T/A220S/Q271E/I356T/R371I
3470	QC0246-C	1052-PF-TRAC-WHITE	Myanmar	Mandalay	21.1171	96.5102	21.2092	96.0035	2013	AS-SE-W	S258L/F313S	QC0246-C	M74I/N75E/K76T/A220S/Q271E/N326S/I356T/R371I
3493	QC0250-C	1052-PF-TRAC-WHITE	Myanmar	Mandalay	21.1171	96.5102	21.2092	96.0035	2013	AS-SE-W	S258L/F313S	QC0250-C	M74I/N75E/K76T/A220S/Q271E/N326S/I356T/R371I
3494	QC0258-C	1052-PF-TRAC-WHITE	Myanmar	Mandalay	21.1171	96.5102	21.2092	96.0035	2013	AS-SE-W	S258L/F313S	QC0258-C	M74I/N75E/K76T/A220S/Q271E/N326S/I356T/R371I
3578	QC0259-C	1052-PF-TRAC-WHITE	Myanmar	Mandalay	21.1171	96.5102	21.2092	96.0035	2013	AS-SE-W	S258L/F313S	QC0259-C	M74I/N75E/K76T/A220S/Q271E/N326S/I356T/R371I
3579	QC0260-C	1052-PF-TRAC-WHITE	Myanmar	Mandalay	21.1171	96.5102	21.2092	96.0035	2013	AS-SE-W	S258L/F313S	QC0260-C	M74I/N75E/K76T/A220S/Q271E/N326S/I356T/R371I
3580	QC0261-C	1052-PF-TRAC-WHITE	Myanmar	Mandalay	21.1171	96.5102	21.2092	96.0035	2013	AS-SE-W	S258L/F313S	QC0261-C	M74I/N75E/K76T/A220S/Q271E/N326S/I356T/R371I
3582	QC0262-C	1052-PF-TRAC-WHITE	Myanmar	Mandalay	21.1171	96.5102	21.2092	96.0035	2013	AS-SE-W	S258L/F313S	QC0262-C	M74I/N75E/K76T/A220S/Q271E/N326S/I356T/R371I
3584	QC0263-C	1052-PF-TRAC-WHITE	Myanmar	Mandalay	21.1171	96.5102	21.2092	96.0035	2013	AS-SE-W	S258L/F313S	QC0263-C	M74I/N75E/K76T/A220S/Q271E/N326S/I356T/R371I
3585	QC0264-C	1052-PF-TRAC-WHITE	Myanmar	Mandalay	21.1171	96.5102	21.2092	96.0035	2013	AS-SE-W	S258L/F313S	QC0264-C	M74I/N75E/K76T/A220S/Q271E/N326S/I356T/R371I
3586	QC0266-C	1052-PF-TRAC-WHITE	Myanmar	Mandalay	21.1171	96.5102	21.2092	96.0035	2013	AS-SE-W	S258L/F313S	QC0266-C	M74I/N75E/K76T/A220S/Q271E/N326S/I356T/R371I
3587	QC0319-C	1052-PF-TRAC-WHITE	Myanmar	Mandalay	21.1171	96.5102	21.2092	96.0035	2013	AS-SE-W	S258L/F313S	QC0319-C	M74I/N75E/K76T/A220S/Q271E/N326S/I356T/R371I
3588	QC0268-C	1052-PF-TRAC-WHITE	Myanmar	Mandalay	21.1171	96.5102	21.2092	96.0035	2014	AS-SE-W	S258L/F313S	QC0268-C	M74I/N75E/K76T/A220S/Q271E/N326S/I356T/R371I
3590	RCN03290	1198-PF-METF-NOSTEN	Myanmar	Kayin	21.1171	96.5102	17.1413	97.7973	2016	AS-SE-W	S258L/F313S	RCN03290	M74I/N75E/K76T/A220S/Q271E/N326S/I356T/R371I
3592	RCN03311	1198-PF-METF-NOSTEN	Myanmar	Kayin	21.1171	96.5102	17.1413	97.7973	2016	AS-SE-W	S258L/F313S	RCN03311	M74I/N75E/K76T/A220S/Q271E/N326S/I356T/R371I
3594	RCN03312	1198-PF-METF-NOSTEN	Myanmar	Kayin	21.1171	96.5102	17.1413	97.7973	2016	AS-SE-W	S258L/F313S	RCN03312	M74I/N75E/K76T/A220S/Q271E/N326S/I356T/R371I
3595	RCN03319	1198-PF-METF-NOSTEN	Myanmar	Kayin	21.1171	96.5102	17.1413	97.7973	2016	AS-SE-W	S258L/F313S	RCN03319	M74I/N75E/K76T/A220S/Q271E/N326S/I356T/R371I
10261	RCN03348	1198-PF-METF-NOSTEN	Myanmar	Kayin	21.1171	96.5102	17.1413	97.7973	2016	AS-SE-W	S258L/F313S	RCN03348	M74I/N75E/K76T/A220S/Q271E/N326S/I356T/R371I
10262	RCN03414	1198-PF-METF-NOSTEN	Myanmar	Kayin	21.1171	96.5102	17.1413	97.7973	2016	AS-SE-W	S258L/F313S	RCN03414	M74I/N75E/K76T/A220S/Q271E/N326S/I356T/R371I
10272	RCN03429	1198-PF-METF-NOSTEN	Myanmar	Kayin	21.1171	96.5102	17.1413	97.7973	2016	AS-SE-W	S258L/F313S	RCN03429	M74I/N75E/K76T/A220S/Q271E/N326S/I356T/R371I
10276	RCN03489	1198-PF-METF-NOSTEN	Myanmar	Kayin	21.1171	96.5102	17.1413	97.7973	2016	AS-SE-W	S258L/F313S	RCN03489	M74I/N75E/K76T/A220S/Q271E/N326S/I356T/R371I
10277	RCN03490	1198-PF-METF-NOSTEN	Myanmar	Kayin	21.1171	96.5102	17.1413	97.7973	2016	AS-SE-W	S258L/F313S	RCN03490	M74I/N75E/K76T/A220S/Q271E/N326S/I356T/R371I
10278	RCN03494	1198-PF-METF-NOSTEN	Myanmar	Kayin	21.1171	96.5102	17.1413	97.7973	2016	AS-SE-W	S258L/F313S	RCN03494	M74I/N75E/K76T/A220S/Q271E/N326S/I356T/R371I
10279	RCN03502	1198-PF-METF-NOSTEN	Myanmar	Kayin	21.1171	96.5102	17.1413	97.7973	2016	AS-SE-W	S258L/F313S	RCN03502	M74I/N75E/K76T/A220S/Q271E/N326S/I356T/R371I
10280	RCN03510	1198-PF-METF-NOSTEN	Myanmar	Kayin	21.1171	96.5102	17.1413	97.7973	2016	AS-SE-W	S258L/F313S	RCN03510	M74I/N75E/K76T/A220S/Q271E/N326S/I356T/R371I
10281	RCN03523	1198-PF-METF-NOSTEN	Myanmar	Kayin	21.1171	96.5102	17.1413	97.7973	2016	AS-SE-W	S258L/F313S	RCN03523	M74I/N75E/K76T/A220S/Q271E/N326S/I356T/R371I
10282	RCN03531	1198-PF-METF-NOSTEN	Myanmar	Kayin	21.1171	96.5102	17.1413	97.7973	2016	AS-SE-W	S258L/F313S	RCN03531	M74I/N75E/K76T/A220S/Q271E/N326S/I356T/R371I
10283	RCN03535	1198-PF-METF-NOSTEN	Myanmar	Kayin	21.1171	96.5102	17.1413	97.7973	2016	AS-SE-W	S258L/F313S	RCN03535	M74I/N75E/K76T/A220S/Q271E/N326S/I356T/R371I
10291	RCN03536	1198-PF-METF-NOSTEN	Myanmar	Kayin	21.1171	96.5102	17.1413	97.7973	2016	AS-SE-W	S258L/F313S	RCN03536	M74I/N75E/K76T/A220S/Q271E/N326S/I356T/R371I
10293	RCN09301	1198-PF-METF-NOSTEN	Myanmar	Kayin	21.1171	96.5102	17.1413	97.7973	2016	AS-SE-W	S258L/F313S	RCN09301	M74I/N75E/K76T/A220S/Q271E/N326S/I356T/R371I
10294	RCN09302	1198-PF-METF-NOSTEN	Myanmar	Kayin	21.1171	96.5102	17.1413	97.7973	2016	AS-SE-W	S258L/F313S	RCN09302	M74I/N75E/K76T/A220S/Q271E/N326S/I356T/R371I
10295	RCN09312	1198-PF-METF-NOSTEN	Myanmar	Kayin	21.1171	96.5102	17.1413	97.7973	2016	AS-SE-W	S258L/F313S	RCN09312	M74I/N75E/K76T/A220S/Q271E/N326S/I356T/R371I
10296	RCN09313	1198-PF-METF-NOSTEN	Myanmar	Kayin	21.1171	96.5102	17.1413	97.7973	2016	AS-SE-W	S258L/F313S	RCN09313	M74I/N75E/K76T/A220S/Q271E/N326S/I356T/R371I
10297	RCN09316	1198-PF-METF-NOSTEN	Myanmar	Kayin	21.1171	96.5102	17.1413	97.7973	2016	AS-SE-W	S258L/F313S	RCN09316	M74I/N75E/K76T/A220S/Q271E/N326S/I356T/R371I
10298	RCN09317	1198-PF-METF-NOSTEN	Myanmar	Kayin	21.1171	96.5102	17.1413	97.7973	2016	AS-SE-W	S258L/F313S	RCN09317	M74I/N75E/K76T/A220S/Q271E/N326S/I356T/R371I
10299	RCN09319	1198-PF-METF-NOSTEN	Myanmar	Kayin	21.1171	96.5102	17.1413	97.7973	2016	AS-SE-W	S258L/F313S	RCN09319	M74I/N75E/K76T/A220S/Q271E/N326S/I356T/R371I
10300	RCN09326	1198-PF-METF-NOSTEN	Myanmar	Kayin	21.1171	96.5102	17.1413	97.7973	2016	AS-SE-W	S258L/F313S	RCN09326	M74I/N75E/K76T/A220S/Q271E/N326S/I356T/R371I
10301	RCN09342	1198-PF-METF-NOSTEN	Myanmar	Kayin	21.1171	96.5102	17.1413	97.7973	2016	AS-SE-W	S258L/F313S	RCN09342	M74I/N75E/K76T/A220S/Q271E/N326S/I356T/R371I
10302	RCN09350	1198-PF-METF-NOSTEN	Myanmar	Kayin	21.1171	96.5102	17.1413	97.7973	2016	AS-SE-W	S258L/F313S	RCN09350	M74I/N75E/K76T/A220S/Q271E/N326S/I356T/R371I
10303	RCN09370	1198-PF-METF-NOSTEN	Myanmar	Kayin	21.1171	96.5102	17.1413	97.7973	2016	AS-SE-W	S258L/F313S	RCN09370	M74I/N75E/K76T/A220S/Q271E/N326S/I356T/R371I
10304	RCN09373	1198-PF-METF-NOSTEN	Myanmar	Kayin	21.1171	96.5102	17.1413	97.7973	2016	AS-SE-W	S258L/F313S	RCN09373	M74I/N75E/K76T/A220S/Q271E/N326S/I356T/R371I
10305	RCN09398	1198-PF-METF-NOSTEN	Myanmar	Kayin	21.1171	96.5102	17.1413	97.7973	2016	AS-SE-W	S258L/F313S	RCN09398	M74I/N75E/K76T/A220S/Q271E/N326S/I356T/R371I
10306	RCN09399	1198-PF-METF-NOSTEN	Myanmar	Kayin	21.1171	96.5102	17.1413	97.7973	2016	AS-SE-W	S258L/F313S	RCN09399	M74I/N75E/K76T/A220S/Q271E/N326S/I356T/R371I
10307	RCN09402	1198-PF-METF-NOSTEN	Myanmar	Kayin	21.1171	96.5102	17.1413	97.7973	2016	AS-SE-W	S258L/F313S	RCN09402	M74I/N75E/K76T/A220S/Q271E/N326S/I356T/R371I
10308	RCN09418	1198-PF-METF-NOSTEN	Myanmar	Kayin	21.1171	96.5102	17.1413	97.7973	2016	AS-SE-W	S258L/F313S	RCN09418	M74I/N75E/K76T/A220S/Q271E/N326S/I356T/R371I
10309	RCN09419	1198-PF-METF-NOSTEN	Myanmar	Kayin	21.1171	96.5102	17.1413	97.7973	2016	AS-SE-W	S258L/F313S	RCN09419	M74I/N75E/K76T/A220S/Q271E/N326S/I356T/R371I
614	RCN09439	1198-PF-METF-NOSTEN	Myanmar	Kayin	21.1171	96.5102	17.1413	97.7973	2016	AS-SE-W	S258L/F313S	RCN09439	M74I/N75E/K76T/A220S/Q271E/N326S/I356T/R371I
615	RCN09472	1198-PF-METF-NOSTEN	Myanmar	Kayin	21.1171	96.5102	17.1413	97.7973	2016	AS-SE-W	S258L/F313S	RCN09472	M74I/N75E/K76T/A220S/Q271E/N326S/I356T/R371I
616	RCN09477	1198-PF-METF-NOSTEN	Myanmar	Kayin	21.1171	96.5102	17.1413	97.7973	2016	AS-SE-W	S258L/F313S	RCN09477	M74I/N75E/K76T/A220S/Q271E/N326S/I356T/R371I
658	RCN09486	1198-PF-METF-NOSTEN	Myanmar	Kayin	21.1171	96.5102	17.1413	97.7973	2016	AS-SE-W	S258L/F313S	RCN09486	M74I/N75E/K76T/A220S/Q271E/N326S/I356T/R371I
660	RCN09489	1198-PF-METF-NOSTEN	Myanmar	Kayin	21.1171	96.5102	17.1413	97.7973	2016	AS-SE-W	S258L/F313S	RCN09489	M74I/N75E/K76T/A220S/Q271E/N326S/I356T/R371I
661	RCN09501	1198-PF-METF-NOSTEN	Myanmar	Kayin	21.1171	96.5102	17.1413	97.7973	2016	AS-SE-W	S258L/F313S	RCN09501	M74I/N75E/K76T/A220S/Q271E/N326S/I356T/R371I
662	RCN09503	1198-PF-METF-NOSTEN	Myanmar	Kayin	21.1171	96.5102	17.1413	97.7973	2016	AS-SE-W	S258L/F313S	RCN09503	M74I/N75E/K76T/A220S/Q271E/N326S/I356T/R371I
663	RCN09507	1198-PF-METF-NOSTEN	Myanmar	Kayin	21.1171	96.5102	17.1413	97.7973	2016	AS-SE-W	S258L/F313S	RCN09507	M74I/N75E/K76T/A220S/Q271E/N326S/I356T/R371I
664	RCN09509	1198-PF-METF-NOSTEN	Myanmar	Kayin	21.1171	96.5102	17.1413	97.7973	2016	AS-SE-W	S258L/F313S	RCN09509	M74I/N75E/K76T/A220S/Q271E/N326S/I356T/R371I
665	RCN09544	1198-PF-METF-NOSTEN	Myanmar	Kayin	21.1171	96.5102	17.1413	97.7973	2016	AS-SE-W	S258L/F313S	RCN09544	M74I/N75E/K76T/A220S/Q271E/N326S/I356T/R371I
666	RCN09592	1198-PF-METF-NOSTEN	Myanmar	Kayin	21.1171	96.5102	17.1413	97.7973	2016	AS-SE-W	S258L/F313S	RCN09592	M74I/N75E/K76T/A220S/Q271E/N326S/I356T/R371I
667	RCN09602	1198-PF-METF-NOSTEN	Myanmar	Kayin	21.1171	96.5102	17.1413	97.7973	2016	AS-SE-W	S258L/F313S	RCN09602	M74I/N75E/K76T/A220S/Q271E/N326S/I356T/R371I
668	RCN09638	1198-PF-METF-NOSTEN	Myanmar	Kayin	21.1171	96.5102	17.1413	97.7973	2016	AS-SE-W	S258L/F313S	RCN09638	M74I/N75E/K76T/A220S/Q271E/N326S/I356T/R371I
669	RCN09652	1198-PF-METF-NOSTEN	Myanmar	Kayin	21.1171	96.5102	17.1413	97.7973	2016	AS-SE-W	S258L/F313S	RCN09652	M74I/N75E/K76T/A220S/Q271E/N326S/I356T/R371I
670	RCN09655	1198-PF-METF-NOSTEN	Myanmar	Kayin	21.1171	96.5102	17.1413	97.7973	2016	AS-SE-W	S258L/F313S	RCN09655	M74I/N75E/K76T/A220S/Q271E/N326S/I356T/R371I
671	RCN09970	1198-PF-METF-NOSTEN	Myanmar	Kayin	21.1171	96.5102	17.1413	97.7973	2016	AS-SE-W	S258L/F313S	RCN09970	M74I/N75E/K76T/A220S/Q271E/N326S/I356T/R371I
672	RCN10002	1198-PF-METF-NOSTEN	Myanmar	Kayin	21.1171	96.5102	17.1413	97.7973	2016	AS-SE-W	S258L/F313S	RCN10002	M74I/N75E/K76T/A220S/Q271E/N326S/I356T/R371I
673	RCN10007	1198-PF-METF-NOSTEN	Myanmar	Kayin	21.1171	96.5102	17.1413	97.7973	2016	AS-SE-W	S258L/F313S	RCN10007	M74I/N75E/K76T/A220S/Q271E/N326S/I356T/R371I
674	RCN09340	1198-PF-METF-NOSTEN	Myanmar	Kayin	21.1171	96.5102	17.1413	97.7973	2017	AS-SE-W	S258L/F313S	RCN09340	M74I/N75E/K76T/A220S/Q271E/N326S/I356T/R371I
677	RCN09466	1198-PF-METF-NOSTEN	Myanmar	Kayin	21.1171	96.5102	17.1413	97.7973	2017	AS-SE-W	S258L/F313S	RCN09466	M74I/N75E/K76T/A220S/Q271E/N326S/I356T/R371I
700	RCN09560	1198-PF-METF-NOSTEN	Myanmar	Kayin	21.1171	96.5102	17.1413	97.7973	2017	AS-SE-W	S258L/F313S	RCN09560	M74I/N75E/K76T/A220S/Q271E/N326S/I356T/R371I
701	RCN09578	1198-PF-METF-NOSTEN	Myanmar	Kayin	21.1171	96.5102	17.1413	97.7973	2017	AS-SE-W	S258L/F313S	RCN09578	M74I/N75E/K76T/A220S/Q271E/N326S/I356T/R371I
703	RCN09580	1198-PF-METF-NOSTEN	Myanmar	Kayin	21.1171	96.5102	17.1413	97.7973	2017	AS-SE-W	S258L/F313S	RCN09580	M74I/N75E/K76T/A220S/Q271E/N326S/I356T/R371I
727	RCN09585	1198-PF-METF-NOSTEN	Myanmar	Kayin	21.1171	96.5102	17.1413	97.7973	2017	AS-SE-W	S258L/F313S	RCN09585	M74I/N75E/K76T/A220S/Q271E/N326S/I356T/R371I
728	RCN09658	1198-PF-METF-NOSTEN	Myanmar	Kayin	21.1171	96.5102	17.1413	97.7973	2017	AS-SE-W	S258L/F313S	RCN09658	M74I/N75E/K76T/A220S/Q271E/N326S/I356T/R371I
730	RCN09677	1198-PF-METF-NOSTEN	Myanmar	Kayin	21.1171	96.5102	17.1413	97.7973	2017	AS-SE-W	S258L/F313S	RCN09677	M74I/N75E/K76T/A220S/Q271E/N326S/I356T/R371I
732	RCN09694	1198-PF-METF-NOSTEN	Myanmar	Kayin	21.1171	96.5102	17.1413	97.7973	2017	AS-SE-W	S258L/F313S	RCN09694	M74I/N75E/K76T/A220S/Q271E/N326S/I356T/R371I
733	RCN09703	1198-PF-METF-NOSTEN	Myanmar	Kayin	21.1171	96.5102	17.1413	97.7973	2017	AS-SE-W	S258L/F313S	RCN09703	M74I/N75E/K76T/A220S/Q271E/N326S/I356T/R371I
734	RCN09710	1198-PF-METF-NOSTEN	Myanmar	Kayin	21.1171	96.5102	17.1413	97.7973	2017	AS-SE-W	S258L/F313S	RCN09710	M74I/N75E/K76T/A220S/Q271E/N326S/I356T/R371I
880	RCN09800	1198-PF-METF-NOSTEN	Myanmar	Kayin	21.1171	96.5102	17.1413	97.7973	2017	AS-SE-W	S258L/F313S	RCN09800	M74I/N75E/K76T/A220S/Q271E/N326S/I356T/R371I
882	RCN09812	1198-PF-METF-NOSTEN	Myanmar	Kayin	21.1171	96.5102	17.1413	97.7973	2017	AS-SE-W	S258L/F313S	RCN09812	M74I/N75E/K76T/A220S/Q271E/N326S/I356T/R371I
885	RCN09832	1198-PF-METF-NOSTEN	Myanmar	Kayin	21.1171	96.5102	17.1413	97.7973	2017	AS-SE-W	S258L/F313S	RCN09832	M74I/N75E/K76T/A220S/Q271E/N326S/I356T/R371I
887	RCN09837	1198-PF-METF-NOSTEN	Myanmar	Kayin	21.1171	96.5102	17.1413	97.7973	2017	AS-SE-W	S258L/F313S	RCN09837	M74I/N75E/K76T/A220S/Q271E/N326S/I356T/R371I
889	RCN09845	1198-PF-METF-NOSTEN	Myanmar	Kayin	21.1171	96.5102	17.1413	97.7973	2017	AS-SE-W	S258L/F313S	RCN09845	M74I/N75E/K76T/A220S/Q271E/N326S/I356T/R371I
890	RCN09868	1198-PF-METF-NOSTEN	Myanmar	Kayin	21.1171	96.5102	17.1413	97.7973	2017	AS-SE-W	S258L/F313S	RCN09868	M74I/N75E/K76T/A220S/Q271E/N326S/I356T/R371I
891	RCN09880	1198-PF-METF-NOSTEN	Myanmar	Kayin	21.1171	96.5102	17.1413	97.7973	2017	AS-SE-W	S258L/F313S	RCN09880	M74I/N75E/K76T/A220S/Q271E/N326S/I356T/R371I
892	RCN09899	1198-PF-METF-NOSTEN	Myanmar	Kayin	21.1171	96.5102	17.1413	97.7973	2017	AS-SE-W	S258L/F313S	RCN09899	M74I/N75E/K76T/A220S/Q271E/N326S/I356T/R371I
893	RCN09919	1198-PF-METF-NOSTEN	Myanmar	Kayin	21.1171	96.5102	17.1413	97.7973	2017	AS-SE-W	S258L/F313S	RCN09919	M74I/N75E/K76T/A220S/Q271E/N326S/I356T/R371I
894	RCN09935	1198-PF-METF-NOSTEN	Myanmar	Kayin	21.1171	96.5102	17.1413	97.7973	2017	AS-SE-W	S258L/F313S	RCN09935	M74I/N75E/K76T/A220S/Q271E/N326S/I356T/R371I
895	RCN09936	1198-PF-METF-NOSTEN	Myanmar	Kayin	21.1171	96.5102	17.1413	97.7973	2017	AS-SE-W	S258L/F313S	RCN09936	M74I/N75E/K76T/A220S/Q271E/N326S/I356T/R371I
897	RCN09946	1198-PF-METF-NOSTEN	Myanmar	Kayin	21.1171	96.5102	17.1413	97.7973	2017	AS-SE-W	S258L/F313S	RCN09946	M74I/N75E/K76T/A220S/Q271E/N326S/I356T/R371I
898	RCN09951	1198-PF-METF-NOSTEN	Myanmar	Kayin	21.1171	96.5102	17.1413	97.7973	2017	AS-SE-W	S258L/F313S	RCN09951	M74I/N75E/K76T/A220S/Q271E/N326S/I356T/R371I
899	RCN09952	1198-PF-METF-NOSTEN	Myanmar	Kayin	21.1171	96.5102	17.1413	97.7973	2017	AS-SE-W	S258L/F313S	RCN09952	M74I/N75E/K76T/A220S/Q271E/N326S/I356T/R371I
902	RCN09954	1198-PF-METF-NOSTEN	Myanmar	Kayin	21.1171	96.5102	17.1413	97.7973	2017	AS-SE-W	S258L/F313S	RCN09954	M74I/N75E/K76T/A220S/Q271E/N326S/I356T/R371I
905	RCN09962	1198-PF-METF-NOSTEN	Myanmar	Kayin	21.1171	96.5102	17.1413	97.7973	2017	AS-SE-W	S258L/F313S	RCN09962	M74I/N75E/K76T/A220S/Q271E/N326S/I356T/R371I
906	RCN09963	1198-PF-METF-NOSTEN	Myanmar	Kayin	21.1171	96.5102	17.1413	97.7973	2017	AS-SE-W	S258L/F313S	RCN09963	M74I/N75E/K76T/A220S/Q271E/N326S/I356T/R371I
908	RCN09964	1198-PF-METF-NOSTEN	Myanmar	Kayin	21.1171	96.5102	17.1413	97.7973	2017	AS-SE-W	S258L/F313S	RCN09964	M74I/N75E/K76T/A220S/Q271E/N326S/I356T/R371I
909	RCN09974	1198-PF-METF-NOSTEN	Myanmar	Kayin	21.1171	96.5102	17.1413	97.7973	2017	AS-SE-W	S258L/F313S	RCN09974	M74I/N75E/K76T/A220S/Q271E/N326S/I356T/R371I
910	RCN09978	1198-PF-METF-NOSTEN	Myanmar	Kayin	21.1171	96.5102	17.1413	97.7973	2017	AS-SE-W	S258L/F313S	RCN09978	M74I/N75E/K76T/A220S/Q271E/N326S/I356T/R371I
911	RCN09979	1198-PF-METF-NOSTEN	Myanmar	Kayin	21.1171	96.5102	17.1413	97.7973	2017	AS-SE-W	S258L/F313S	RCN09979	M74I/N75E/K76T/A220S/Q271E/N326S/I356T/R371I
912	RCN09986	1198-PF-METF-NOSTEN	Myanmar	Kayin	21.1171	96.5102	17.1413	97.7973	2017	AS-SE-W	S258L/F313S	RCN09986	M74I/N75E/K76T/A220S/Q271E/N326S/I356T/R371I
913	RCN10008	1198-PF-METF-NOSTEN	Myanmar	Kayin	21.1171	96.5102	17.1413	97.7973	2017	AS-SE-W	S258L/F313S	RCN10008	M74I/N75E/K76T/A220S/Q271E/N326S/I356T/R371I
916	RCN10019	1198-PF-METF-NOSTEN	Myanmar	Kayin	21.1171	96.5102	17.1413	97.7973	2017	AS-SE-W	S258L/F313S	RCN10019	M74I/N75E/K76T/A220S/Q271E/N326S/I356T/R371I
918	PN0057-C	1021-PF-PG-MUELLER	Papua New Guinea	Madang	-6.47684	145.254	-5.1608	145.288	2009	OC-NG	S258L/F313S	PN0057-C	C72S/K76T/A220S/N326D/T333A/I356L
919	PN0086-C	1021-PF-PG-MUELLER	Papua New Guinea	Madang	-6.47684	145.254	-5.1608	145.288	2009	OC-NG	S258L/F313S	PN0086-C	C72S/K76T/A220S/N326D/T333A/I356L
920	PN0087-C	1021-PF-PG-MUELLER	Papua New Guinea	Madang	-6.47684	145.254	-5.1608	145.288	2009	OC-NG	S258L/F313S	PN0087-C	C72S/K76T/A220S/N326D/T333A/I356L
921	SPT34231	1233-PF-PG-MITA	Papua New Guinea	East Sepik	-6.47684	145.254	-4.31183	143.172	2017	OC-NG	S258L/F313S	SPT34231	C72S/K76T/A220S/N326D/T333A/I356L
922	SPT34232	1233-PF-PG-MITA	Papua New Guinea	East Sepik	-6.47684	145.254	-4.31183	143.172	2017	OC-NG	S258L/F313S	SPT34232	C72S/K76T/A220S/N326D/T333A/I356L
927	SPT34300	1233-PF-PG-MITA	Papua New Guinea	East Sepik	-6.47684	145.254	-4.31183	143.172	2017	OC-NG	S258L/F313S	SPT34300
929	PE0521-C	1095-PF-TZ-ISHENGOMA	Tanzania	Kagera	-6.26622	34.8257	-1.88039	31.4539	2013	AF-E	S258L/F313S	PE0521-C	M74I/N75E/K76T/A220S/Q271E/R371I
930	SPT15656	1167-PF-TZ-ISHENGOMA-SM	Tanzania	Kigoma	-6.26622	34.8257	-4.76434	30.4028	2014	AF-E	S258L/F313S	SPT15656	M74I/N75E/K76T/A220S/Q271E/R371I
931	PE0265-C	1095-PF-TZ-ISHENGOMA	Tanzania	Tanga	-6.26622	34.8257	-5.218	38.2819	2013	AF-E	S258L/F313S	PE0265-C
1268	PE0485-C	1095-PF-TZ-ISHENGOMA	Tanzania	Kagera	-6.26622	34.8257	-1.88039	31.4539	2013	AF-E	S258L/F313S	PE0485-C
2280	PD1253-C	1125-PF-TH-NOSTEN	Thailand	Tak	15.1104	101.015	16.715	98.7911	2001	AS-SE-W	S258L/F313S	PD1253-C	M74I/N75E/K76T/A220S/Q271E/N326S/I356T/R371I
2281	PD1256-C	1125-PF-TH-NOSTEN	Thailand	Tak	15.1104	101.015	16.715	98.7911	2001	AS-SE-W	S258L/F313S	PD1256-C	M74I/N75E/K76T/A220S/Q271E/N326S/I356T/R371I
2283	PD1261-C	1125-PF-TH-NOSTEN	Thailand	Tak	15.1104	101.015	16.715	98.7911	2001	AS-SE-W	S258L/F313S	PD1261-C	M74I/N75E/K76T/A220S/Q271E/N326S/I356T/R371I
2284	PD1262-C	1125-PF-TH-NOSTEN	Thailand	Tak	15.1104	101.015	16.715	98.7911	2001	AS-SE-W	S258L/F313S	PD1262-C	M74I/N75E/K76T/A220S/Q271E/N326S/I356T/R371I
2285	PD1263-C	1125-PF-TH-NOSTEN	Thailand	Tak	15.1104	101.015	16.715	98.7911	2001	AS-SE-W	S258L/F313S	PD1263-C	M74I/N75E/K76T/A220S/Q271E/N326S/I356T/R371I
2287	PD1264-C	1125-PF-TH-NOSTEN	Thailand	Tak	15.1104	101.015	16.715	98.7911	2001	AS-SE-W	S258L/F313S	PD1264-C	M74I/N75E/K76T/A220S/Q271E/N326S/I356T/R371I
2294	PD1271-C	1125-PF-TH-NOSTEN	Thailand	Tak	15.1104	101.015	16.715	98.7911	2001	AS-SE-W	S258L/F313S	PD1271-C	M74I/N75E/K76T/A220S/Q271E/N326S/I356T/R371I
2301	PD1279-C	1125-PF-TH-NOSTEN	Thailand	Tak	15.1104	101.015	16.715	98.7911	2001	AS-SE-W	S258L/F313S	PD1279-C	M74I/N75E/K76T/A220S/Q271E/N326S/I356T/R371I
2303	PD1283-C	1125-PF-TH-NOSTEN	Thailand	Tak	15.1104	101.015	16.715	98.7911	2001	AS-SE-W	S258L/F313S	PD1283-C	M74I/N75E/K76T/A220S/Q271E/N326S/I356T/R371I
2304	PD1284-C	1125-PF-TH-NOSTEN	Thailand	Tak	15.1104	101.015	16.715	98.7911	2001	AS-SE-W	S258L/F313S	PD1284-C	M74I/N75E/K76T/A220S/Q271E/N326S/I356T/R371I
2305	PD1286-C	1125-PF-TH-NOSTEN	Thailand	Tak	15.1104	101.015	16.715	98.7911	2001	AS-SE-W	S258L/F313S	PD1286-C	M74I/N75E/K76T/A220S/Q271E/N326S/I356T/R371I
2315	PD1291-C	1125-PF-TH-NOSTEN	Thailand	Tak	15.1104	101.015	16.715	98.7911	2002	AS-SE-W	S258L/F313S	PD1291-C	M74I/N75E/K76T/A220S/Q271E/N326S/I356T/R371I
2316	PD1296-C	1125-PF-TH-NOSTEN	Thailand	Tak	15.1104	101.015	16.715	98.7911	2002	AS-SE-W	S258L/F313S	PD1296-C	M74I/N75E/K76T/A220S/Q271E/N326S/I356T/R371I
2325	PD1301-C	1125-PF-TH-NOSTEN	Thailand	Tak	15.1104	101.015	16.715	98.7911	2002	AS-SE-W	S258L/F313S	PD1301-C	M74I/N75E/K76T/A220S/Q271E/N326S/R371I
3367	PD1304-C	1125-PF-TH-NOSTEN	Thailand	Tak	15.1104	101.015	16.715	98.7911	2002	AS-SE-W	S258L/F313S	PD1304-C	M74I/N75E/K76T/A220S/Q271E/N326S/I356T/R371I
3369	PD1306-C	1125-PF-TH-NOSTEN	Thailand	Tak	15.1104	101.015	16.715	98.7911	2002	AS-SE-W	S258L/F313S	PD1306-C	M74I/N75E/K76T/A220S/Q271E/N326S/I356T/R371I
3375	PD1308-C	1125-PF-TH-NOSTEN	Thailand	Tak	15.1104	101.015	16.715	98.7911	2002	AS-SE-W	S258L/F313S	PD1308-C	M74I/N75E/K76T/A220S/Q271E/N326S/I356T/R371I
3376	PD1311-C	1125-PF-TH-NOSTEN	Thailand	Tak	15.1104	101.015	16.715	98.7911	2002	AS-SE-W	S258L/F313S	PD1311-C	M74I/N75E/K76T/A220S/Q271E/N326S/I356T/R371I
3377	PD1319-C	1125-PF-TH-NOSTEN	Thailand	Tak	15.1104	101.015	16.715	98.7911	2002	AS-SE-W	S258L/F313S	PD1319-C	M74I/N75E/K76T/A220S/Q271E/N326S/I356T/R371I
3378	PD1322-C	1125-PF-TH-NOSTEN	Thailand	Tak	15.1104	101.015	16.715	98.7911	2002	AS-SE-W	S258L/F313S	PD1322-C	M74I/N75E/K76T/A220S/Q271E/N326S/I356T/R371I
3379	PD1331-C	1125-PF-TH-NOSTEN	Thailand	Tak	15.1104	101.015	16.715	98.7911	2002	AS-SE-W	S258L/F313S	PD1331-C	M74I/N75E/K76T/A220S/Q271E/N326S/I356T/R371I
3380	PD1332-C	1125-PF-TH-NOSTEN	Thailand	Tak	15.1104	101.015	16.715	98.7911	2002	AS-SE-W	S258L/F313S	PD1332-C	M74I/N75E/K76T/A220S/Q271E/N326S/I356T/R371I
3381	PD1335-C	1125-PF-TH-NOSTEN	Thailand	Tak	15.1104	101.015	16.715	98.7911	2002	AS-SE-W	S258L/F313S	PD1335-C	M74I/N75E/K76T/A220S/Q271E/N326S/I356T/R371I
3382	PD1457-C	1125-PF-TH-NOSTEN	Thailand	Tak	15.1104	101.015	16.715	98.7911	2002	AS-SE-W	S258L/F313S	PD1457-C	M74I/N75E/K76T/A220S/Q271E/N326S/I356T/R371I
3412	PD1464-C	1125-PF-TH-NOSTEN	Thailand	Tak	15.1104	101.015	16.715	98.7911	2002	AS-SE-W	S258L/F313S	PD1464-C	M74I/N75E/K76T/A220S/Q271E/N326S/I356T/R371I
5089	PD0074-C	1010-PF-TH-ANDERSON	Thailand	Tak	15.1104	101.015	16.715	98.7911	2003	AS-SE-W	S258L/F313S	PD0074-C	M74I/N75E/K76T/A220S/Q271E/N326S/I356T/R371I
5090	PD0075-C	1010-PF-TH-ANDERSON	Thailand	Tak	15.1104	101.015	16.715	98.7911	2003	AS-SE-W	S258L/F313S	PD0075-C	M74I/N75E/K76T/A220S/Q271E/N326S/I356T/R371I
5091	PD0076-C	1010-PF-TH-ANDERSON	Thailand	Tak	15.1104	101.015	16.715	98.7911	2003	AS-SE-W	S258L/F313S	PD0076-C	M74I/N75E/K76T/A220S/Q271E/N326S/I356T/R371I
10284	PD0077-C	1010-PF-TH-ANDERSON	Thailand	Tak	15.1104	101.015	16.715	98.7911	2003	AS-SE-W	S258L/F313S	PD0077-C	M74I/N75E/K76T/A220S/Q271E/N326S/I356T/R371I
10285	PD0078-C	1010-PF-TH-ANDERSON	Thailand	Tak	15.1104	101.015	16.715	98.7911	2003	AS-SE-W	S258L/F313S	PD0078-C	M74I/N75E/K76T/A220S/Q271E/N326S/I356T/R371I
2332	PD0079-C	1010-PF-TH-ANDERSON	Thailand	Tak	15.1104	101.015	16.715	98.7911	2003	AS-SE-W	S258L/F313S	PD0079-C	M74I/N75E/K76T/A220S/Q271E/N326S/I356T/R371I
2336	PD0083-C	1010-PF-TH-ANDERSON	Thailand	Tak	15.1104	101.015	16.715	98.7911	2003	AS-SE-W	S258L/F313S	PD0083-C	M74I/N75E/K76T/A220S/Q271E/N326S/I356T/R371I
2339	PD0085-C	1010-PF-TH-ANDERSON	Thailand	Tak	15.1104	101.015	16.715	98.7911	2003	AS-SE-W	S258L/F313S	PD0085-C	M74I/N75E/K76T/A220S/Q271E/N326S/I356T/R371I
2364	PD0086-C	1010-PF-TH-ANDERSON	Thailand	Tak	15.1104	101.015	16.715	98.7911	2003	AS-SE-W	S258L/F313S	PD0086-C	M74I/N75E/K76T/A220S/Q271E/N326S/I356T/R371I
2365	PD0106-C	1010-PF-TH-ANDERSON	Thailand	Tak	15.1104	101.015	16.715	98.7911	2003	AS-SE-W	S258L/F313S	PD0106-C	M74I/N75E/K76T/A220S/Q271E/N326S/I356T/R371I
2373	PD0112-C	1010-PF-TH-ANDERSON	Thailand	Tak	15.1104	101.015	16.715	98.7911	2003	AS-SE-W	S258L/F313S	PD0112-C	M74I/N75E/K76T/A220S/Q271E/N326S/I356T/R371I
2374	PD0144-C	1010-PF-TH-ANDERSON	Thailand	Tak	15.1104	101.015	16.715	98.7911	2003	AS-SE-W	S258L/F313S	PD0144-C	M74I/N75E/K76T/A220S/Q271E/N326S/I356T/R371I
2375	PD1341-C	1125-PF-TH-NOSTEN	Thailand	Tak	15.1104	101.015	16.715	98.7911	2003	AS-SE-W	S258L/F313S	PD1341-C	M74I/N75E/K76T/A220S/Q271E/N326S/I356T/R371I
2376	PD1348-C	1125-PF-TH-NOSTEN	Thailand	Tak	15.1104	101.015	16.715	98.7911	2003	AS-SE-W	S258L/F313S	PD1348-C	M74I/N75E/K76T/A220S/Q271E/N326S/I356T/R371I
2378	PD1355-C	1125-PF-TH-NOSTEN	Thailand	Tak	15.1104	101.015	16.715	98.7911	2003	AS-SE-W	S258L/F313S	PD1355-C	M74I/N75E/K76T/A220S/Q271E/N326S/I356T/R371I
2379	PD1357-C	1125-PF-TH-NOSTEN	Thailand	Tak	15.1104	101.015	16.715	98.7911	2003	AS-SE-W	S258L/F313S	PD1357-C	M74I/N75E/K76T/A220S/Q271E/N326S/I356T/R371I
2380	PD1358-C	1125-PF-TH-NOSTEN	Thailand	Tak	15.1104	101.015	16.715	98.7911	2003	AS-SE-W	S258L/F313S	PD1358-C	M74I/N75E/K76T/A220S/Q271E/N326S/I356T/R371I
2381	PD1360-C	1125-PF-TH-NOSTEN	Thailand	Tak	15.1104	101.015	16.715	98.7911	2003	AS-SE-W	S258L/F313S	PD1360-C	M74I/N75E/K76T/A220S/Q271E/N326S/I356T/R371I
2382	PD1364-C	1125-PF-TH-NOSTEN	Thailand	Tak	15.1104	101.015	16.715	98.7911	2003	AS-SE-W	S258L/F313S	PD1364-C	M74I/N75E/K76T/A220S/Q271E/N326S/I356T/R371I
2383	PD1366-C	1125-PF-TH-NOSTEN	Thailand	Tak	15.1104	101.015	16.715	98.7911	2003	AS-SE-W	S258L/F313S	PD1366-C	M74I/N75E/K76T/A220S/Q271E/N326S/I356T/R371I
2385	PD1376-C	1125-PF-TH-NOSTEN	Thailand	Tak	15.1104	101.015	16.715	98.7911	2003	AS-SE-W	S258L/F313S	PD1376-C	M74I/N75E/K76T/A220S/Q271E/N326S/I356T/R371I
2386	PD1379-C	1125-PF-TH-NOSTEN	Thailand	Tak	15.1104	101.015	16.715	98.7911	2003	AS-SE-W	S258L/F313S	PD1379-C	M74I/N75E/K76T/A220S/Q271E/N326S/I356T/R371I
3384	PD1380-C	1125-PF-TH-NOSTEN	Thailand	Tak	15.1104	101.015	16.715	98.7911	2003	AS-SE-W	S258L/F313S	PD1380-C	M74I/N75E/K76T/A220S/Q271E/N326S/I356T/R371I
5092	PD1388-C	1125-PF-TH-NOSTEN	Thailand	Tak	15.1104	101.015	16.715	98.7911	2003	AS-SE-W	S258L/F313S	PD1388-C	M74I/N75E/K76T/A220S/Q271E/N326S/I356T/R371I
5093	PD1391-C	1125-PF-TH-NOSTEN	Thailand	Tak	15.1104	101.015	16.715	98.7911	2003	AS-SE-W	S258L/F313S	PD1391-C	M74I/N75E/K76T/A220S/Q271E/N326S/I356T/R371I
5103	PD1465-C	1125-PF-TH-NOSTEN	Thailand	Tak	15.1104	101.015	16.715	98.7911	2003	AS-SE-W	S258L/F313S	PD1465-C	M74I/N75E/K76T/A220S/Q271E/N326S/I356T/R371I
5104	PD1470-C	1125-PF-TH-NOSTEN	Thailand	Tak	15.1104	101.015	16.715	98.7911	2003	AS-SE-W	S258L/F313S	PD1470-C	M74I/N75E/K76T/A220S/Q271E/N326S/I356T/R371I
5105	PD1476-C	1125-PF-TH-NOSTEN	Thailand	Tak	15.1104	101.015	16.715	98.7911	2003	AS-SE-W	S258L/F313S	PD1476-C	M74I/N75E/K76T/A220S/Q271E/N326S/I356T/R371I
9384	PD1478-C	1125-PF-TH-NOSTEN	Thailand	Tak	15.1104	101.015	16.715	98.7911	2003	AS-SE-W	S258L/F313S	PD1478-C	M74I/N75E/K76T/A220S/Q271E/N326S/I356T/R371I
10263	PD1480-C	1125-PF-TH-NOSTEN	Thailand	Tak	15.1104	101.015	16.715	98.7911	2003	AS-SE-W	S258L/F313S	PD1480-C	M74I/N75E/K76T/A220S/Q271E/N326S/I356T/R371I
10264	PD1484-C	1125-PF-TH-NOSTEN	Thailand	Tak	15.1104	101.015	16.715	98.7911	2003	AS-SE-W	S258L/F313S	PD1484-C	M74I/N75E/K76T/A220S/Q271E/N326S/I356T/R371I
10265	PD1486-C	1125-PF-TH-NOSTEN	Thailand	Tak	15.1104	101.015	16.715	98.7911	2003	AS-SE-W	S258L/F313S	PD1486-C	M74I/N75E/K76T/A220S/Q271E/N326S/I356T/R371I
10327	PD1490-C	1125-PF-TH-NOSTEN	Thailand	Tak	15.1104	101.015	16.715	98.7911	2003	AS-SE-W	S258L/F313S	PD1490-C	M74I/N75E/K76T/A220S/Q271E/N326S/I356T/R371I
10330	PD1491-C	1125-PF-TH-NOSTEN	Thailand	Tak	15.1104	101.015	16.715	98.7911	2003	AS-SE-W	S258L/F313S	PD1491-C	M74I/N75E/K76T/A220S/Q271E/N326S/I356T/R371I
10334	PD0060-C	1010-PF-TH-ANDERSON	Thailand	Tak	15.1104	101.015	16.715	98.7911	2004	AS-SE-W	S258L/F313S	PD0060-C	M74I/N75E/K76T/A220S/Q271E/N326S/I356T/R371I
10337	PD0063-C	1010-PF-TH-ANDERSON	Thailand	Tak	15.1104	101.015	16.715	98.7911	2004	AS-SE-W	S258L/F313S	PD0063-C	M74I/N75E/K76T/A220S/Q271E/N326S/I356T/R371I
10338	PD0073-C	1010-PF-TH-ANDERSON	Thailand	Tak	15.1104	101.015	16.715	98.7911	2004	AS-SE-W	S258L/F313S	PD0073-C	M74I/N75E/K76T/A220S/Q271E/N326S/I356T/R371I
2351	PD0089-C	1010-PF-TH-ANDERSON	Thailand	Tak	15.1104	101.015	16.715	98.7911	2004	AS-SE-W	S258L/F313S	PD0089-C	M74I/N75E/K76T/A220S/Q271E/N326S/I356T/R371I
2355	PD0090-C	1010-PF-TH-ANDERSON	Thailand	Tak	15.1104	101.015	16.715	98.7911	2004	AS-SE-W	S258L/F313S	PD0090-C	M74I/N75E/K76T/A220S/Q271E/N326S/I356T/R371I
2361	PD0091-C	1010-PF-TH-ANDERSON	Thailand	Tak	15.1104	101.015	16.715	98.7911	2004	AS-SE-W	S258L/F313S	PD0091-C	M74I/N75E/K76T/A220S/Q271E/N326S/I356T/R371I
2367	PD0093-C	1010-PF-TH-ANDERSON	Thailand	Tak	15.1104	101.015	16.715	98.7911	2004	AS-SE-W	S258L/F313S	PD0093-C	M74I/N75E/K76T/A220S/Q271E/N326S/I356T/R371I
4189	PD0094-C	1010-PF-TH-ANDERSON	Thailand	Tak	15.1104	101.015	16.715	98.7911	2004	AS-SE-W	S258L/F313S	PD0094-C	M74I/N75E/K76T/A220S/Q271E/N326S/I356T/R371I
4197	PD0095-C	1010-PF-TH-ANDERSON	Thailand	Tak	15.1104	101.015	16.715	98.7911	2004	AS-SE-W	S258L/F313S	PD0095-C	M74I/N75E/K76T/A220S/Q271E/N326S/I356T/R371I
4203	PD0096-C	1010-PF-TH-ANDERSON	Thailand	Tak	15.1104	101.015	16.715	98.7911	2004	AS-SE-W	S258L/F313S	PD0096-C	M74I/N75E/K76T/A220S/Q271E/N326S/I356T/R371I
4334	PD0097-C	1010-PF-TH-ANDERSON	Thailand	Tak	15.1104	101.015	16.715	98.7911	2004	AS-SE-W	S258L/F313S	PD0097-C	M74I/N75E/K76T/A220S/Q271E/N326S/I356T/R371I
4446	PD0113-C	1010-PF-TH-ANDERSON	Thailand	Tak	15.1104	101.015	16.715	98.7911	2004	AS-SE-W	S258L/F313S	PD0113-C	M74I/N75E/K76T/A220S/Q271E/N326S/I356T/R371I
4451	PD0115-Cx	1010-PF-TH-ANDERSON	Thailand	Tak	15.1104	101.015	16.715	98.7911	2004	AS-SE-W	S258L/F313S	PD0115-Cx	M74I/N75E/K76T/A220S/Q271E/N326S/I356T/R371I
4456	PD0136-C	1010-PF-TH-ANDERSON	Thailand	Tak	15.1104	101.015	16.715	98.7911	2004	AS-SE-W	S258L/F313S	PD0136-C	M74I/N75E/K76T/A220S/Q271E/N326S/I356T/R371I
4484	PD0140-C	1010-PF-TH-ANDERSON	Thailand	Tak	15.1104	101.015	16.715	98.7911	2004	AS-SE-W	S258L/F313S	PD0140-C	M74I/N75E/K76T/A220S/Q271E/N326S/I356T/R371I
4494	PD1397-C	1125-PF-TH-NOSTEN	Thailand	Tak	15.1104	101.015	16.715	98.7911	2004	AS-SE-W	S258L/F313S	PD1397-C	M74I/N75E/K76T/A220S/Q271E/N326S/I356T/R371I
4495	PD1399-C	1125-PF-TH-NOSTEN	Thailand	Tak	15.1104	101.015	16.715	98.7911	2004	AS-SE-W	S258L/F313S	PD1399-C	M74I/N75E/K76T/A220S/Q271E/N326S/I356T/R371I
4496	PD1400-C	1125-PF-TH-NOSTEN	Thailand	Tak	15.1104	101.015	16.715	98.7911	2004	AS-SE-W	S258L/F313S	PD1400-C	M74I/N75E/K76T/A220S/Q271E/N326S/I356T/R371I
4500	PD1402-C	1125-PF-TH-NOSTEN	Thailand	Tak	15.1104	101.015	16.715	98.7911	2004	AS-SE-W	S258L/F313S	PD1402-C	M74I/N75E/K76T/A220S/Q271E/N326S/I356T/R371I
4509	PD1404-C	1125-PF-TH-NOSTEN	Thailand	Tak	15.1104	101.015	16.715	98.7911	2004	AS-SE-W	S258L/F313S	PD1404-C	M74I/N75E/K76T/A220S/Q271E/N326S/I356T/R371I
4513	PD1406-C	1125-PF-TH-NOSTEN	Thailand	Tak	15.1104	101.015	16.715	98.7911	2004	AS-SE-W	S258L/F313S	PD1406-C	M74I/N75E/K76T/A220S/Q271E/N326S/I356T/R371I
4514	PD1407-C	1125-PF-TH-NOSTEN	Thailand	Tak	15.1104	101.015	16.715	98.7911	2004	AS-SE-W	S258L/F313S	PD1407-C	M74I/N75E/K76T/A220S/Q271E/N326S/I356T/R371I
4515	PD1412-C	1125-PF-TH-NOSTEN	Thailand	Tak	15.1104	101.015	16.715	98.7911	2004	AS-SE-W	S258L/F313S	PD1412-C	M74I/N75E/K76T/A220S/Q271E/N326S/I356T/R371I
4516	PD1413-C	1125-PF-TH-NOSTEN	Thailand	Tak	15.1104	101.015	16.715	98.7911	2004	AS-SE-W	S258L/F313S	PD1413-C	M74I/N75E/K76T/A220S/Q271E/N326S/I356T/R371I
4517	PD1414-C	1125-PF-TH-NOSTEN	Thailand	Tak	15.1104	101.015	16.715	98.7911	2004	AS-SE-W	S258L/F313S	PD1414-C	M74I/N75E/K76T/A220S/Q271E/N326S/I356T/R371I
4537	PD1415-C	1125-PF-TH-NOSTEN	Thailand	Tak	15.1104	101.015	16.715	98.7911	2004	AS-SE-W	S258L/F313S	PD1415-C	M74I/N75E/K76T/A220S/Q271E/N326S/I356T/R371I
5097	PD1418-C	1125-PF-TH-NOSTEN	Thailand	Tak	15.1104	101.015	16.715	98.7911	2004	AS-SE-W	S258L/F313S	PD1418-C	M74I/N75E/K76T/A220S/Q271E/N326S/I356T/R371I
5100	PD1419-C	1125-PF-TH-NOSTEN	Thailand	Tak	15.1104	101.015	16.715	98.7911	2004	AS-SE-W	S258L/F313S	PD1419-C	M74I/N75E/K76T/A220S/Q271E/N326S/I356T/R371I
5101	PD1421-C	1125-PF-TH-NOSTEN	Thailand	Tak	15.1104	101.015	16.715	98.7911	2004	AS-SE-W	S258L/F313S	PD1421-C	M74I/N75E/K76T/A220S/Q271E/N326S/I356T/R371I
5279	PD1426-C	1125-PF-TH-NOSTEN	Thailand	Tak	15.1104	101.015	16.715	98.7911	2004	AS-SE-W	S258L/F313S	PD1426-C	M74I/N75E/K76T/A220S/Q271E/N326S/I356T/R371I
5280	PD1427-C	1125-PF-TH-NOSTEN	Thailand	Tak	15.1104	101.015	16.715	98.7911	2004	AS-SE-W	S258L/F313S	PD1427-C	M74I/N75E/K76T/A220S/Q271E/N326S/I356T/R371I
10267	PD1428-C	1125-PF-TH-NOSTEN	Thailand	Tak	15.1104	101.015	16.715	98.7911	2004	AS-SE-W	S258L/F313S	PD1428-C	M74I/N75E/K76T/A220S/Q271E/N326S/I356T/R371I
10268	PD1493-C	1125-PF-TH-NOSTEN	Thailand	Tak	15.1104	101.015	16.715	98.7911	2004	AS-SE-W	S258L/F313S	PD1493-C	M74I/N75E/K76T/A220S/Q271E/N326S/I356T/R371I
10269	PD1494-C	1125-PF-TH-NOSTEN	Thailand	Tak	15.1104	101.015	16.715	98.7911	2004	AS-SE-W	S258L/F313S	PD1494-C	M74I/N75E/K76T/A220S/Q271E/N326S/I356T/R371I
10270	PD1496-C	1125-PF-TH-NOSTEN	Thailand	Tak	15.1104	101.015	16.715	98.7911	2004	AS-SE-W	S258L/F313S	PD1496-C	M74I/N75E/K76T/A220S/Q271E/N326S/I356T/R371I
10340	PD1497-C	1125-PF-TH-NOSTEN	Thailand	Tak	15.1104	101.015	16.715	98.7911	2004	AS-SE-W	S258L/F313S	PD1497-C	M74I/N75E/K76T/A220S/Q271E/N326S/I356T/R371I
10355	PD1501-C	1125-PF-TH-NOSTEN	Thailand	Tak	15.1104	101.015	16.715	98.7911	2004	AS-SE-W	S258L/F313S	PD1501-C	M74I/N75E/K76T/A220S/Q271E/N326S/I356T/R371I
10359	PD1504-C	1125-PF-TH-NOSTEN	Thailand	Tak	15.1104	101.015	16.715	98.7911	2004	AS-SE-W	S258L/F313S	PD1504-C	M74I/N75E/K76T/A220S/Q271E/N326S/I356T/R371I
10360	PD1505-C	1125-PF-TH-NOSTEN	Thailand	Tak	15.1104	101.015	16.715	98.7911	2004	AS-SE-W	S258L/F313S	PD1505-C	M74I/N75E/K76T/A220S/Q271E/N326S/I356T/R371I
10361	PD1507-C	1125-PF-TH-NOSTEN	Thailand	Tak	15.1104	101.015	16.715	98.7911	2004	AS-SE-W	S258L/F313S	PD1507-C	M74I/N75E/K76T/A220S/Q271E/N326S/I356T/R371I
10364	PD1510-C	1125-PF-TH-NOSTEN	Thailand	Tak	15.1104	101.015	16.715	98.7911	2004	AS-SE-W	S258L/F313S	PD1510-C	M74I/N75E/K76T/A220S/Q271E/N326S/I356T/R371I
10368	PD1511-C	1125-PF-TH-NOSTEN	Thailand	Tak	15.1104	101.015	16.715	98.7911	2004	AS-SE-W	S258L/F313S	PD1511-C	M74I/N75E/K76T/A220S/Q271E/N326S/I356T/R371I
10370	PD1514-C	1125-PF-TH-NOSTEN	Thailand	Tak	15.1104	101.015	16.715	98.7911	2004	AS-SE-W	S258L/F313S	PD1514-C	M74I/N75E/K76T/A220S/Q271E/N326S/I356T/R371I
10372	PD1518-C	1125-PF-TH-NOSTEN	Thailand	Tak	15.1104	101.015	16.715	98.7911	2004	AS-SE-W	S258L/F313S	PD1518-C	M74I/N75E/K76T/A220S/Q271E/N326S/I356T/R371I
4492	PD0020-C	1016-PF-TH-NOSTEN	Thailand	Tak	15.1104	101.015	16.715	98.7911	2005	AS-SE-W	S258L/F313S	PD0020-C	M74I/N75E/K76T/A220S/Q271E/N326S/I356T/R371I
4582	PD0021-C	1016-PF-TH-NOSTEN	Thailand	Tak	15.1104	101.015	16.715	98.7911	2005	AS-SE-W	S258L/F313S	PD0021-C	M74I/N75E/K76T/A220S/Q271E/N326S/I356T/R371I
4586	PD0022-C	1016-PF-TH-NOSTEN	Thailand	Tak	15.1104	101.015	16.715	98.7911	2005	AS-SE-W	S258L/F313S	PD0022-C	M74I/N75E/K76T/A220S/Q271E/N326S/I356T/R371I
4591	PD0023-C	1016-PF-TH-NOSTEN	Thailand	Tak	15.1104	101.015	16.715	98.7911	2005	AS-SE-W	S258L/F313S	PD0023-C	M74I/N75E/K76T/A220S/Q271E/N326S/I356T/R371I
4596	PD0025-C	1010-PF-TH-ANDERSON	Thailand	Tak	15.1104	101.015	16.715	98.7911	2005	AS-SE-W	S258L/F313S	PD0025-C	M74I/N75E/K76T/A220S/Q271E/N326S/I356T/R371I
4614	PD0026-C	1010-PF-TH-ANDERSON	Thailand	Tak	15.1104	101.015	16.715	98.7911	2005	AS-SE-W	S258L/F313S	PD0026-C	M74I/N75E/K76T/A220S/Q271E/N326S/I356T/R371I
4707	PD0028-C	1010-PF-TH-ANDERSON	Thailand	Tak	15.1104	101.015	16.715	98.7911	2005	AS-SE-W	S258L/F313S	PD0028-C	M74I/N75E/K76T/A220S/Q271E/N326S/I356T/R371I
4712	PD0029-C	1010-PF-TH-ANDERSON	Thailand	Tak	15.1104	101.015	16.715	98.7911	2005	AS-SE-W	S258L/F313S	PD0029-C	M74I/N75E/K76T/A220S/Q271E/N326S/I356T/R371I
4724	PD0032-C	1010-PF-TH-ANDERSON	Thailand	Tak	15.1104	101.015	16.715	98.7911	2005	AS-SE-W	S258L/F313S	PD0032-C	M74I/N75E/K76T/A220S/Q271E/N326S/I356T/R371I
4802	PD0045-C	1010-PF-TH-ANDERSON	Thailand	Tak	15.1104	101.015	16.715	98.7911	2005	AS-SE-W	S258L/F313S	PD0045-C	M74I/N75E/K76T/A220S/Q271E/N326S/I356T/R371I
4840	PD0053-C	1010-PF-TH-ANDERSON	Thailand	Tak	15.1104	101.015	16.715	98.7911	2005	AS-SE-W	S258L/F313S	PD0053-C	M74I/N75E/K76T/A220S/Q271E/N326S/I356T/R371I
4874	PD0098-C	1010-PF-TH-ANDERSON	Thailand	Tak	15.1104	101.015	16.715	98.7911	2005	AS-SE-W	S258L/F313S	PD0098-C	M74I/N75E/K76T/A220S/Q271E/N326S/I356T/R371I
4885	PD0101-C	1010-PF-TH-ANDERSON	Thailand	Tak	15.1104	101.015	16.715	98.7911	2005	AS-SE-W	S258L/F313S	PD0101-C	M74I/N75E/K76T/A220S/Q271E/N326S/I356T/R371I
4896	PD0103-C	1010-PF-TH-ANDERSON	Thailand	Tak	15.1104	101.015	16.715	98.7911	2005	AS-SE-W	S258L/F313S	PD0103-C	M74I/N75E/K76T/A220S/Q271E/N326S/I356T/R371I
4897	PD0116-Cx	1010-PF-TH-ANDERSON	Thailand	Tak	15.1104	101.015	16.715	98.7911	2005	AS-SE-W	S258L/F313S	PD0116-Cx	M74I/N75E/K76T/A220S/Q271E/N326S/I356T/R371I
4940	PD0117-C	1010-PF-TH-ANDERSON	Thailand	Tak	15.1104	101.015	16.715	98.7911	2005	AS-SE-W	S258L/F313S	PD0117-C	M74I/N75E/K76T/A220S/Q271E/N326S/I356T/R371I
4959	PD0119-C	1010-PF-TH-ANDERSON	Thailand	Tak	15.1104	101.015	16.715	98.7911	2005	AS-SE-W	S258L/F313S	PD0119-C	M74I/N75E/K76T/A220S/Q271E/N326S/I356T/R371I
4991	PD0121-C	1010-PF-TH-ANDERSON	Thailand	Tak	15.1104	101.015	16.715	98.7911	2005	AS-SE-W	S258L/F313S	PD0121-C	M74I/N75E/K76T/A220S/Q271E/N326S/I356T/R371I
4995	PD0123-C	1010-PF-TH-ANDERSON	Thailand	Tak	15.1104	101.015	16.715	98.7911	2005	AS-SE-W	S258L/F313S	PD0123-C	M74I/N75E/K76T/A220S/Q271E/N326S/I356T/R371I
4999	PD0124-C	1010-PF-TH-ANDERSON	Thailand	Tak	15.1104	101.015	16.715	98.7911	2005	AS-SE-W	S258L/F313S	PD0124-C	M74I/N75E/K76T/A220S/Q271E/N326S/I356T/R371I
5001	PD0128-C	1010-PF-TH-ANDERSON	Thailand	Tak	15.1104	101.015	16.715	98.7911	2005	AS-SE-W	S258L/F313S	PD0128-C	M74I/N75E/K76T/A220S/Q271E/N326S/I356T/R371I
5002	PD0130-C	1010-PF-TH-ANDERSON	Thailand	Tak	15.1104	101.015	16.715	98.7911	2005	AS-SE-W	S258L/F313S	PD0130-C	M74I/N75E/K76T/A220S/Q271E/N326S/I356T/R371I
5023	PD0132-C	1010-PF-TH-ANDERSON	Thailand	Tak	15.1104	101.015	16.715	98.7911	2005	AS-SE-W	S258L/F313S	PD0132-C	M74I/N75E/K76T/A220S/Q271E/N326S/I356T/R371I
5063	PD0133-C	1010-PF-TH-ANDERSON	Thailand	Tak	15.1104	101.015	16.715	98.7911	2005	AS-SE-W	S258L/F313S	PD0133-C	M74I/N75E/K76T/A220S/Q271E/N326S/I356T/R371I
5064	PD0135-C	1010-PF-TH-ANDERSON	Thailand	Tak	15.1104	101.015	16.715	98.7911	2005	AS-SE-W	S258L/F313S	PD0135-C	M74I/N75E/K76T/A220S/Q271E/N326S/I356T/R371I
5113	PD0141-C	1010-PF-TH-ANDERSON	Thailand	Tak	15.1104	101.015	16.715	98.7911	2005	AS-SE-W	S258L/F313S	PD0141-C	M74I/N75E/K76T/A220S/Q271E/N326S/I356T/R371I
5119	PD0143-C	1010-PF-TH-ANDERSON	Thailand	Tak	15.1104	101.015	16.715	98.7911	2005	AS-SE-W	S258L/F313S	PD0143-C	M74I/N75E/K76T/A220S/Q271E/N326S/I356T/R371I
5120	PD1430-C	1125-PF-TH-NOSTEN	Thailand	Tak	15.1104	101.015	16.715	98.7911	2005	AS-SE-W	S258L/F313S	PD1430-C	M74I/N75E/K76T/A220S/Q271E/N326S/I356T/R371I
5126	PD0716-C	1125-PF-TH-NOSTEN	Thailand	Tak	15.1104	101.015	16.715	98.7911	2007	AS-SE-W	S258L/F313S	PD0716-C	M74I/N75E/K76T/A220S/Q271E/N326S/I356T/R371I
5141	PD0833-C	1125-PF-TH-NOSTEN	Thailand	Tak	15.1104	101.015	16.715	98.7911	2007	AS-SE-W	S258L/F313S	PD0833-C	M74I/N75E/K76T/A220S/Q271E/N326S/I356T/R371I
5172	PD0882-C	1125-PF-TH-NOSTEN	Thailand	Tak	15.1104	101.015	16.715	98.7911	2007	AS-SE-W	S258L/F313S	PD0882-C	M74I/N75E/K76T/A220S/Q271E/N326S/I356T/R371I
5182	PD0883-C	1125-PF-TH-NOSTEN	Thailand	Tak	15.1104	101.015	16.715	98.7911	2007	AS-SE-W	S258L/F313S	PD0883-C	M74I/N75E/K76T/A220S/Q271E/N326S/I356T/R371I
5222	PD0884-C	1125-PF-TH-NOSTEN	Thailand	Tak	15.1104	101.015	16.715	98.7911	2007	AS-SE-W	S258L/F313S	PD0884-C	M74I/N75E/K76T/A220S/Q271E/N326S/I356T/R371I
5223	PD0885-C	1125-PF-TH-NOSTEN	Thailand	Tak	15.1104	101.015	16.715	98.7911	2007	AS-SE-W	S258L/F313S	PD0885-C	M74I/N75E/K76T/A220S/Q271E/N326S/I356T/R371I
5226	PD0937-C	1125-PF-TH-NOSTEN	Thailand	Tak	15.1104	101.015	16.715	98.7911	2007	AS-SE-W	S258L/F313S	PD0937-C	M74I/N75E/K76T/A220S/Q271E/N326S/I356T/R371I
5229	PD0939-C	1125-PF-TH-NOSTEN	Thailand	Tak	15.1104	101.015	16.715	98.7911	2007	AS-SE-W	S258L/F313S	PD0939-C	M74I/N75E/K76T/A220S/Q271E/N326S/I356T/R371I
5234	PD0940-C	1125-PF-TH-NOSTEN	Thailand	Tak	15.1104	101.015	16.715	98.7911	2007	AS-SE-W	S258L/F313S	PD0940-C	M74I/N75E/K76T/A220S/Q271E/N326S/I356T/R371I
5244	PD0941-C	1125-PF-TH-NOSTEN	Thailand	Tak	15.1104	101.015	16.715	98.7911	2007	AS-SE-W	S258L/F313S	PD0941-C	M74I/N75E/K76T/A220S/Q271E/N326S/I356T/R371I
5250	PD0943-C	1125-PF-TH-NOSTEN	Thailand	Tak	15.1104	101.015	16.715	98.7911	2007	AS-SE-W	S258L/F313S	PD0943-C	M74I/N75E/K76T/A220S/Q271E/N326S/I356T/R371I
5252	PD0944-C	1125-PF-TH-NOSTEN	Thailand	Tak	15.1104	101.015	16.715	98.7911	2007	AS-SE-W	S258L/F313S	PD0944-C	M74I/N75E/K76T/A220S/Q271E/N326S/I356T/R371I
5253	PD0948-C	1125-PF-TH-NOSTEN	Thailand	Tak	15.1104	101.015	16.715	98.7911	2007	AS-SE-W	S258L/F313S	PD0948-C	M74I/N75E/K76T/A220S/Q271E/N326S/I356T/R371I
5256	PD0950-C	1125-PF-TH-NOSTEN	Thailand	Tak	15.1104	101.015	16.715	98.7911	2007	AS-SE-W	S258L/F313S	PD0950-C	M74I/N75E/K76T/A220S/Q271E/N326S/I356T/R371I
5257	PD0952-C	1125-PF-TH-NOSTEN	Thailand	Tak	15.1104	101.015	16.715	98.7911	2007	AS-SE-W	S258L/F313S	PD0952-C	M74I/N75E/K76T/A220S/Q271E/N326S/I356T/R371I
5259	PD0110-C	1031-PF-SEA-PLOWE	Thailand	Tak	15.1104	101.015	16.715	98.7911	2008	AS-SE-W	S258L/F313S	PD0110-C	M74I/N75E/K76T/A220S/Q271E/N326S/I356T/R371I
5269	PD0720-C	1125-PF-TH-NOSTEN	Thailand	Tak	15.1104	101.015	16.715	98.7911	2008	AS-SE-W	S258L/F313S	PD0720-C	M74I/N75E/K76T/A220S/Q271E/N326S/I356T/R371I
5305	PD0722-C	1125-PF-TH-NOSTEN	Thailand	Tak	15.1104	101.015	16.715	98.7911	2008	AS-SE-W	S258L/F313S	PD0722-C	M74I/N75E/K76T/A220S/Q271E/N326S/I356T/R371I
5341	PD0724-C	1125-PF-TH-NOSTEN	Thailand	Tak	15.1104	101.015	16.715	98.7911	2008	AS-SE-W	S258L/F313S	PD0724-C	M74I/N75E/K76T/A220S/Q271E/N326S/I356T/R371I
5342	PD0725-C	1125-PF-TH-NOSTEN	Thailand	Tak	15.1104	101.015	16.715	98.7911	2008	AS-SE-W	S258L/F313S	PD0725-C	M74I/N75E/K76T/A220S/Q271E/N326S/I356T/R371I
5383	PD0727-C	1125-PF-TH-NOSTEN	Thailand	Tak	15.1104	101.015	16.715	98.7911	2008	AS-SE-W	S258L/F313S	PD0727-C	M74I/N75E/K76T/A220S/Q271E/N326S/I356T/R371I
5389	PD0728-C	1125-PF-TH-NOSTEN	Thailand	Tak	15.1104	101.015	16.715	98.7911	2008	AS-SE-W	S258L/F313S	PD0728-C	M74I/N75E/K76T/A220S/Q271E/N326S/I356T/R371I
5392	PD0735-C	1125-PF-TH-NOSTEN	Thailand	Tak	15.1104	101.015	16.715	98.7911	2008	AS-SE-W	S258L/F313S	PD0735-C	M74I/N75E/K76T/A220S/Q271E/N326S/I356T/R371I
5397	PD0744-C	1125-PF-TH-NOSTEN	Thailand	Tak	15.1104	101.015	16.715	98.7911	2008	AS-SE-W	S258L/F313S	PD0744-C	M74I/N75E/K76T/A220S/Q271E/N326S/I356T/R371I
5399	PD0748-C	1125-PF-TH-NOSTEN	Thailand	Tak	15.1104	101.015	16.715	98.7911	2008	AS-SE-W	S258L/F313S	PD0748-C	M74I/N75E/K76T/A220S/Q271E/N326S/I356T/R371I
5400	PD0749-C	1125-PF-TH-NOSTEN	Thailand	Tak	15.1104	101.015	16.715	98.7911	2008	AS-SE-W	S258L/F313S	PD0749-C	M74I/N75E/K76T/A220S/Q271E/N326S/I356T/R371I
5402	PD0751-C	1125-PF-TH-NOSTEN	Thailand	Tak	15.1104	101.015	16.715	98.7911	2008	AS-SE-W	S258L/F313S	PD0751-C	M74I/N75E/K76T/A220S/Q271E/N326S/I356T/R371I
5417	PD0754-C	1125-PF-TH-NOSTEN	Thailand	Tak	15.1104	101.015	16.715	98.7911	2008	AS-SE-W	S258L/F313S	PD0754-C	M74I/N75E/K76T/A220S/Q271E/N326S/I356T/R371I
5430	PD0755-C	1125-PF-TH-NOSTEN	Thailand	Tak	15.1104	101.015	16.715	98.7911	2008	AS-SE-W	S258L/F313S	PD0755-C	M74I/N75E/K76T/A220S/Q271E/N326S/I356T/R371I
5431	PD0758-C	1125-PF-TH-NOSTEN	Thailand	Tak	15.1104	101.015	16.715	98.7911	2008	AS-SE-W	S258L/F313S	PD0758-C	M74I/N75E/K76T/A220S/Q271E/N326S/I356T/R371I
5432	PD0760-C	1125-PF-TH-NOSTEN	Thailand	Tak	15.1104	101.015	16.715	98.7911	2008	AS-SE-W	S258L/F313S	PD0760-C	M74I/N75E/K76T/A220S/Q271E/N326S/I356T/R371I
5433	PD0761-C	1125-PF-TH-NOSTEN	Thailand	Tak	15.1104	101.015	16.715	98.7911	2008	AS-SE-W	S258L/F313S	PD0761-C	M74I/N75E/K76T/A220S/Q271E/N326S/I356T/R371I
5434	PD0766-C	1125-PF-TH-NOSTEN	Thailand	Tak	15.1104	101.015	16.715	98.7911	2008	AS-SE-W	S258L/F313S	PD0766-C	M74I/N75E/K76T/A220S/Q271E/N326S/I356T/R371I
5435	PD0771-C	1125-PF-TH-NOSTEN	Thailand	Tak	15.1104	101.015	16.715	98.7911	2008	AS-SE-W	S258L/F313S	PD0771-C	M74I/N75E/K76T/A220S/Q271E/N326S/I356T/R371I
5438	PD0776-C	1125-PF-TH-NOSTEN	Thailand	Tak	15.1104	101.015	16.715	98.7911	2008	AS-SE-W	S258L/F313S	PD0776-C	M74I/N75E/K76T/A220S/Q271E/N326S/I356T/R371I
5443	PD0785-C	1125-PF-TH-NOSTEN	Thailand	Tak	15.1104	101.015	16.715	98.7911	2008	AS-SE-W	S258L/F313S	PD0785-C	M74I/N75E/K76T/A220S/Q271E/N326S/I356T/R371I
5458	PD0836-C	1125-PF-TH-NOSTEN	Thailand	Tak	15.1104	101.015	16.715	98.7911	2008	AS-SE-W	S258L/F313S	PD0836-C	M74I/N75E/K76T/A220S/Q271E/N326S/I356T/R371I
5714	PD0840-C	1125-PF-TH-NOSTEN	Thailand	Tak	15.1104	101.015	16.715	98.7911	2008	AS-SE-W	S258L/F313S	PD0840-C	M74I/N75E/K76T/A220S/Q271E/N326S/I356T/R371I
5715	PD0846-C	1125-PF-TH-NOSTEN	Thailand	Tak	15.1104	101.015	16.715	98.7911	2008	AS-SE-W	S258L/F313S	PD0846-C	M74I/N75E/K76T/A220S/Q271E/N326S/I356T/R371I
5720	PD0847-C	1125-PF-TH-NOSTEN	Thailand	Tak	15.1104	101.015	16.715	98.7911	2008	AS-SE-W	S258L/F313S	PD0847-C	M74I/N75E/K76T/A220S/Q271E/N326S/I356T/R371I
5721	PD0848-C	1125-PF-TH-NOSTEN	Thailand	Tak	15.1104	101.015	16.715	98.7911	2008	AS-SE-W	S258L/F313S	PD0848-C	M74I/N75E/K76T/A220S/Q271E/N326S/I356T/R371I
5722	PD0851-C	1125-PF-TH-NOSTEN	Thailand	Tak	15.1104	101.015	16.715	98.7911	2008	AS-SE-W	S258L/F313S	PD0851-C	M74I/N75E/K76T/A220S/Q271E/N326S/I356T/R371I
5723	PD0860-C	1125-PF-TH-NOSTEN	Thailand	Tak	15.1104	101.015	16.715	98.7911	2008	AS-SE-W	S258L/F313S	PD0860-C	M74I/N75E/K76T/A220S/Q271E/N326S/I356T/R371I
5725	PD0863-C	1125-PF-TH-NOSTEN	Thailand	Tak	15.1104	101.015	16.715	98.7911	2008	AS-SE-W	S258L/F313S	PD0863-C	M74I/N75E/K76T/A220S/Q271E/N326S/I356T/R371I
5729	PD0864-C	1125-PF-TH-NOSTEN	Thailand	Tak	15.1104	101.015	16.715	98.7911	2008	AS-SE-W	S258L/F313S	PD0864-C	M74I/N75E/K76T/A220S/Q271E/N326S/I356T/R371I
5741	PD0869-C	1125-PF-TH-NOSTEN	Thailand	Tak	15.1104	101.015	16.715	98.7911	2008	AS-SE-W	S258L/F313S	PD0869-C	M74I/N75E/K76T/A220S/Q271E/N326S/I356T/R371I
5745	PD0889-C	1125-PF-TH-NOSTEN	Thailand	Tak	15.1104	101.015	16.715	98.7911	2008	AS-SE-W	S258L/F313S	PD0889-C	M74I/N75E/K76T/A220S/Q271E/N326S/I356T/R371I
5754	PD0892-C	1125-PF-TH-NOSTEN	Thailand	Tak	15.1104	101.015	16.715	98.7911	2008	AS-SE-W	S258L/F313S	PD0892-C	M74I/N75E/K76T/A220S/Q271E/N326S/I356T/R371I
5755	PD0898-C	1125-PF-TH-NOSTEN	Thailand	Tak	15.1104	101.015	16.715	98.7911	2008	AS-SE-W	S258L/F313S	PD0898-C	M74I/N75E/K76T/A220S/Q271E/N326S/I356T/R371I
5766	PD0904-C	1125-PF-TH-NOSTEN	Thailand	Tak	15.1104	101.015	16.715	98.7911	2008	AS-SE-W	S258L/F313S	PD0904-C	M74I/N75E/K76T/A220S/Q271E/N326S/I356T/R371I
5767	PD0905-C	1125-PF-TH-NOSTEN	Thailand	Tak	15.1104	101.015	16.715	98.7911	2008	AS-SE-W	S258L/F313S	PD0905-C	M74I/N75E/K76T/A220S/Q271E/N326S/I356T/R371I
5770	PD0906-C	1125-PF-TH-NOSTEN	Thailand	Tak	15.1104	101.015	16.715	98.7911	2008	AS-SE-W	S258L/F313S	PD0906-C	M74I/N75E/K76T/A220S/Q271E/N326S/I356T/R371I
5775	PD0907-C	1125-PF-TH-NOSTEN	Thailand	Tak	15.1104	101.015	16.715	98.7911	2008	AS-SE-W	S258L/F313S	PD0907-C	M74I/N75E/K76T/A220S/Q271E/N326S/I356T/R371I
5776	PD0909-C	1125-PF-TH-NOSTEN	Thailand	Tak	15.1104	101.015	16.715	98.7911	2008	AS-SE-W	S258L/F313S	PD0909-C	M74I/N75E/K76T/A220S/Q271E/N326S/I356T/R371I
5787	PD0910-C	1125-PF-TH-NOSTEN	Thailand	Tak	15.1104	101.015	16.715	98.7911	2008	AS-SE-W	S258L/F313S	PD0910-C	M74I/N75E/K76T/A220S/Q271E/N326S/I356T/R371I
5800	PD0914-C	1125-PF-TH-NOSTEN	Thailand	Tak	15.1104	101.015	16.715	98.7911	2008	AS-SE-W	S258L/F313S	PD0914-C	M74I/N75E/K76T/A220S/Q271E/N326S/I356T/R371I
5802	PD0916-C	1125-PF-TH-NOSTEN	Thailand	Tak	15.1104	101.015	16.715	98.7911	2008	AS-SE-W	S258L/F313S	PD0916-C	M74I/N75E/K76T/A220S/Q271E/N326S/I356T/R371I
5806	PD0918-C	1125-PF-TH-NOSTEN	Thailand	Tak	15.1104	101.015	16.715	98.7911	2008	AS-SE-W	S258L/F313S	PD0918-C	M74I/N75E/K76T/A220S/Q271E/N326S/I356T/R371I
5808	PD0919-C	1125-PF-TH-NOSTEN	Thailand	Tak	15.1104	101.015	16.715	98.7911	2008	AS-SE-W	S258L/F313S	PD0919-C	M74I/N75E/K76T/A220S/Q271E/N326S/I356T/R371I
5815	PD0953-C	1125-PF-TH-NOSTEN	Thailand	Tak	15.1104	101.015	16.715	98.7911	2008	AS-SE-W	S258L/F313S	PD0953-C	M74I/N75E/K76T/A220S/Q271E/N326S/I356T/R371I
5816	PD0954-C	1125-PF-TH-NOSTEN	Thailand	Tak	15.1104	101.015	16.715	98.7911	2008	AS-SE-W	S258L/F313S	PD0954-C	M74I/N75E/K76T/A220S/Q271E/N326S/I356T/R371I
5820	PD0958-C	1125-PF-TH-NOSTEN	Thailand	Tak	15.1104	101.015	16.715	98.7911	2008	AS-SE-W	S258L/F313S	PD0958-C	M74I/N75E/K76T/A220S/Q271E/N326S/I356T/R371I
5821	PD0959-C	1125-PF-TH-NOSTEN	Thailand	Tak	15.1104	101.015	16.715	98.7911	2008	AS-SE-W	S258L/F313S	PD0959-C	M74I/N75E/K76T/A220S/Q271E/N326S/I356T/R371I
5841	PD0963-C	1125-PF-TH-NOSTEN	Thailand	Tak	15.1104	101.015	16.715	98.7911	2008	AS-SE-W	S258L/F313S	PD0963-C	M74I/N75E/K76T/A220S/Q271E/N326S/I356T/R371I
5871	PD0964-C	1125-PF-TH-NOSTEN	Thailand	Tak	15.1104	101.015	16.715	98.7911	2008	AS-SE-W	S258L/F313S	PD0964-C	M74I/N75E/K76T/A220S/Q271E/N326S/I356T/R371I
5877	PD0966-C	1125-PF-TH-NOSTEN	Thailand	Tak	15.1104	101.015	16.715	98.7911	2008	AS-SE-W	S258L/F313S	PD0966-C	M74I/N75E/K76T/A220S/Q271E/N326S/I356T/R371I
5898	PD0967-C	1125-PF-TH-NOSTEN	Thailand	Tak	15.1104	101.015	16.715	98.7911	2008	AS-SE-W	S258L/F313S	PD0967-C	M74I/N75E/K76T/A220S/Q271E/N326S/I356T/R371I
5905	PD0968-C	1125-PF-TH-NOSTEN	Thailand	Tak	15.1104	101.015	16.715	98.7911	2008	AS-SE-W	S258L/F313S	PD0968-C	M74I/N75E/K76T/A220S/Q271E/N326S/I356T/R371I
5908	PD0969-C	1125-PF-TH-NOSTEN	Thailand	Tak	15.1104	101.015	16.715	98.7911	2008	AS-SE-W	S258L/F313S	PD0969-C	M74I/N75E/K76T/A220S/Q271E/N326S/I356T/R371I
6102	PD0971-C	1125-PF-TH-NOSTEN	Thailand	Tak	15.1104	101.015	16.715	98.7911	2008	AS-SE-W	S258L/F313S	PD0971-C	M74I/N75E/K76T/A220S/Q271E/N326S/I356T/R371I
6113	PD0982-C	1125-PF-TH-NOSTEN	Thailand	Tak	15.1104	101.015	16.715	98.7911	2008	AS-SE-W	S258L/F313S	PD0982-C	M74I/N75E/K76T/A220S/Q271E/N326S/I356T/R371I
6117	PD0985-C	1125-PF-TH-NOSTEN	Thailand	Tak	15.1104	101.015	16.715	98.7911	2008	AS-SE-W	S258L/F313S	PD0985-C	M74I/N75E/K76T/A220S/Q271E/N326S/I356T/R371I
7303	PD0987-C	1125-PF-TH-NOSTEN	Thailand	Tak	15.1104	101.015	16.715	98.7911	2008	AS-SE-W	S258L/F313S	PD0987-C	M74I/N75E/K76T/A220S/Q271E/N326S/I356T/R371I
8312	PD0997-C	1125-PF-TH-NOSTEN	Thailand	Tak	15.1104	101.015	16.715	98.7911	2008	AS-SE-W	S258L/F313S	PD0997-C	M74I/N75E/K76T/A220S/Q271E/N326S/I356T/R371I
10374	PD1000-C	1125-PF-TH-NOSTEN	Thailand	Tak	15.1104	101.015	16.715	98.7911	2008	AS-SE-W	S258L/F313S	PD1000-C	M74I/N75E/K76T/A220S/Q271E/N326S/I356T/R371I
5315	PD1005-C	1125-PF-TH-NOSTEN	Thailand	Tak	15.1104	101.015	16.715	98.7911	2008	AS-SE-W	S258L/F313S	PD1005-C	M74I/N75E/K76T/A220S/Q271E/N326S/I356T/R371I
5321	PD1008-C	1125-PF-TH-NOSTEN	Thailand	Tak	15.1104	101.015	16.715	98.7911	2008	AS-SE-W	S258L/F313S	PD1008-C	M74I/N75E/K76T/A220S/Q271E/N326S/I356T/R371I
5426	PD1009-C	1125-PF-TH-NOSTEN	Thailand	Tak	15.1104	101.015	16.715	98.7911	2008	AS-SE-W	S258L/F313S	PD1009-C	M74I/N75E/K76T/A220S/Q271E/N326S/I356T/R371I
5427	PD1013-C	1125-PF-TH-NOSTEN	Thailand	Tak	15.1104	101.015	16.715	98.7911	2008	AS-SE-W	S258L/F313S	PD1013-C	M74I/N75E/K76T/A220S/Q271E/N326S/I356T/R371I
5440	PD1016-C	1125-PF-TH-NOSTEN	Thailand	Tak	15.1104	101.015	16.715	98.7911	2008	AS-SE-W	S258L/F313S	PD1016-C	M74I/N75E/K76T/A220S/Q271E/N326S/I356T/R371I
5449	PD1017-C	1125-PF-TH-NOSTEN	Thailand	Tak	15.1104	101.015	16.715	98.7911	2008	AS-SE-W	S258L/F313S	PD1017-C	M74I/N75E/K76T/A220S/Q271E/N326S/I356T/R371I
5477	PD1018-C	1125-PF-TH-NOSTEN	Thailand	Tak	15.1104	101.015	16.715	98.7911	2008	AS-SE-W	S258L/F313S	PD1018-C	M74I/N75E/K76T/A220S/Q271E/N326S/I356T/R371I
5481	PD1019-C	1125-PF-TH-NOSTEN	Thailand	Tak	15.1104	101.015	16.715	98.7911	2008	AS-SE-W	S258L/F313S	PD1019-C	M74I/N75E/K76T/A220S/Q271E/N326S/I356T/R371I
5486	PD1021-C	1125-PF-TH-NOSTEN	Thailand	Tak	15.1104	101.015	16.715	98.7911	2008	AS-SE-W	S258L/F313S	PD1021-C	M74I/N75E/K76T/A220S/Q271E/N326S/I356T/R371I
5498	PD1026-C	1125-PF-TH-NOSTEN	Thailand	Tak	15.1104	101.015	16.715	98.7911	2008	AS-SE-W	S258L/F313S	PD1026-C	M74I/N75E/K76T/A220S/Q271E/N326S/I356T/R371I
5499	PD1027-C	1125-PF-TH-NOSTEN	Thailand	Tak	15.1104	101.015	16.715	98.7911	2008	AS-SE-W	S258L/F313S	PD1027-C	M74I/N75E/K76T/A220S/Q271E/N326S/I356T/R371I
5500	PD1028-C	1125-PF-TH-NOSTEN	Thailand	Tak	15.1104	101.015	16.715	98.7911	2008	AS-SE-W	S258L/F313S	PD1028-C	M74I/N75E/K76T/A220S/Q271E/N326S/I356T/R371I
5501	PD1030-C	1125-PF-TH-NOSTEN	Thailand	Tak	15.1104	101.015	16.715	98.7911	2008	AS-SE-W	S258L/F313S	PD1030-C	M74I/N75E/K76T/A220S/Q271E/N326S/I356T/R371I
5510	PD1031-C	1125-PF-TH-NOSTEN	Thailand	Tak	15.1104	101.015	16.715	98.7911	2008	AS-SE-W	S258L/F313S	PD1031-C	M74I/N75E/K76T/A220S/Q271E/N326S/I356T/R371I
5512	PD1033-C	1125-PF-TH-NOSTEN	Thailand	Tak	15.1104	101.015	16.715	98.7911	2008	AS-SE-W	S258L/F313S	PD1033-C	M74I/N75E/K76T/A220S/Q271E/N326S/I356T/R371I
5519	PD1036-C	1125-PF-TH-NOSTEN	Thailand	Tak	15.1104	101.015	16.715	98.7911	2008	AS-SE-W	S258L/F313S	PD1036-C	M74I/N75E/K76T/A220S/Q271E/N326S/I356T/R371I
5521	PD1037-C	1125-PF-TH-NOSTEN	Thailand	Tak	15.1104	101.015	16.715	98.7911	2008	AS-SE-W	S258L/F313S	PD1037-C	M74I/N75E/K76T/A220S/Q271E/N326S/I356T/R371I
5523	PD1047-C	1125-PF-TH-NOSTEN	Thailand	Tak	15.1104	101.015	16.715	98.7911	2008	AS-SE-W	S258L/F313S	PD1047-C	M74I/N75E/K76T/A220S/Q271E/N326S/I356T/R371I
5525	PD1048-C	1125-PF-TH-NOSTEN	Thailand	Tak	15.1104	101.015	16.715	98.7911	2008	AS-SE-W	S258L/F313S	PD1048-C	M74I/N75E/K76T/A220S/Q271E/N326S/I356T/R371I
5526	PD1049-C	1125-PF-TH-NOSTEN	Thailand	Tak	15.1104	101.015	16.715	98.7911	2008	AS-SE-W	S258L/F313S	PD1049-C	M74I/N75E/K76T/A220S/Q271E/N326S/I356T/R371I
5527	PD1051-C	1125-PF-TH-NOSTEN	Thailand	Tak	15.1104	101.015	16.715	98.7911	2008	AS-SE-W	S258L/F313S	PD1051-C	M74I/N75E/K76T/A220S/Q271E/N326S/I356T/R371I
5528	PD1052-C	1125-PF-TH-NOSTEN	Thailand	Tak	15.1104	101.015	16.715	98.7911	2008	AS-SE-W	S258L/F313S	PD1052-C	M74I/N75E/K76T/A220S/Q271E/N326S/I356T/R371I
5536	PD1053-C	1125-PF-TH-NOSTEN	Thailand	Tak	15.1104	101.015	16.715	98.7911	2008	AS-SE-W	S258L/F313S	PD1053-C	M74I/N75E/K76T/A220S/Q271E/N326S/I356T/R371I
5537	PD1054-C	1125-PF-TH-NOSTEN	Thailand	Tak	15.1104	101.015	16.715	98.7911	2008	AS-SE-W	S258L/F313S	PD1054-C	M74I/N75E/K76T/A220S/Q271E/N326S/I356T/R371I
5538	PD1061-C	1125-PF-TH-NOSTEN	Thailand	Tak	15.1104	101.015	16.715	98.7911	2008	AS-SE-W	S258L/F313S	PD1061-C	M74I/N75E/K76T/A220S/Q271E/N326S/I356T/R371I
5539	PD1064-C	1125-PF-TH-NOSTEN	Thailand	Tak	15.1104	101.015	16.715	98.7911	2008	AS-SE-W	S258L/F313S	PD1064-C	M74I/N75E/K76T/A220S/Q271E/N326S/I356T/R371I
5540	PD1073-C	1125-PF-TH-NOSTEN	Thailand	Tak	15.1104	101.015	16.715	98.7911	2008	AS-SE-W	S258L/F313S	PD1073-C	M74I/N75E/K76T/A220S/Q271E/N326S/I356T/R371I
5541	PD1075-C	1125-PF-TH-NOSTEN	Thailand	Tak	15.1104	101.015	16.715	98.7911	2008	AS-SE-W	S258L/F313S	PD1075-C	M74I/N75E/K76T/A220S/Q271E/N326S/I356T/R371I
5542	PD1081-C	1125-PF-TH-NOSTEN	Thailand	Tak	15.1104	101.015	16.715	98.7911	2008	AS-SE-W	S258L/F313S	PD1081-C	M74I/N75E/K76T/A220S/Q271E/N326S/I356T/R371I
5552	PD1082-C	1125-PF-TH-NOSTEN	Thailand	Tak	15.1104	101.015	16.715	98.7911	2008	AS-SE-W	S258L/F313S	PD1082-C	M74I/N75E/K76T/A220S/Q271E/N326S/I356T/R371I
5553	PD1083-C	1125-PF-TH-NOSTEN	Thailand	Tak	15.1104	101.015	16.715	98.7911	2008	AS-SE-W	S258L/F313S	PD1083-C	M74I/N75E/K76T/A220S/Q271E/N326S/I356T/R371I
5554	PD1087-C	1125-PF-TH-NOSTEN	Thailand	Tak	15.1104	101.015	16.715	98.7911	2008	AS-SE-W	S258L/F313S	PD1087-C	M74I/N75E/K76T/A220S/Q271E/N326S/I356T/R371I
5557	PD1090-C	1125-PF-TH-NOSTEN	Thailand	Tak	15.1104	101.015	16.715	98.7911	2008	AS-SE-W	S258L/F313S	PD1090-C	M74I/N75E/K76T/A220S/Q271E/N326S/I356T/R371I
5558	PD1091-C	1125-PF-TH-NOSTEN	Thailand	Tak	15.1104	101.015	16.715	98.7911	2008	AS-SE-W	S258L/F313S	PD1091-C	M74I/N75E/K76T/A220S/Q271E/N326S/I356T/R371I
5559	PD1093-C	1125-PF-TH-NOSTEN	Thailand	Tak	15.1104	101.015	16.715	98.7911	2008	AS-SE-W	S258L/F313S	PD1093-C	M74I/N75E/K76T/A220S/Q271E/N326S/I356T/R371I
5560	PD1096-C	1125-PF-TH-NOSTEN	Thailand	Tak	15.1104	101.015	16.715	98.7911	2008	AS-SE-W	S258L/F313S	PD1096-C	M74I/N75E/K76T/A220S/Q271E/N326S/I356T/R371I
5575	PD1099-C	1125-PF-TH-NOSTEN	Thailand	Tak	15.1104	101.015	16.715	98.7911	2008	AS-SE-W	S258L/F313S	PD1099-C	M74I/N75E/K76T/A220S/Q271E/N326S/I356T/R371I
5604	PD1101-C	1125-PF-TH-NOSTEN	Thailand	Tak	15.1104	101.015	16.715	98.7911	2008	AS-SE-W	S258L/F313S	PD1101-C	M74I/N75E/K76T/A220S/Q271E/N326S/I356T/R371I
5605	PD1102-C	1125-PF-TH-NOSTEN	Thailand	Tak	15.1104	101.015	16.715	98.7911	2008	AS-SE-W	S258L/F313S	PD1102-C	M74I/N75E/K76T/A220S/Q271E/N326S/I356T/R371I
5606	PD1103-C	1125-PF-TH-NOSTEN	Thailand	Tak	15.1104	101.015	16.715	98.7911	2008	AS-SE-W	S258L/F313S	PD1103-C	M74I/N75E/K76T/A220S/Q271E/N326S/I356T/R371I
5613	PD1106-C	1125-PF-TH-NOSTEN	Thailand	Tak	15.1104	101.015	16.715	98.7911	2008	AS-SE-W	S258L/F313S	PD1106-C	M74I/N75E/K76T/A220S/Q271E/N326S/I356T/R371I
5637	PD1109-C	1125-PF-TH-NOSTEN	Thailand	Tak	15.1104	101.015	16.715	98.7911	2008	AS-SE-W	S258L/F313S	PD1109-C	M74I/N75E/K76T/A220S/Q271E/N326S/I356T/R371I
5647	PD1110-C	1125-PF-TH-NOSTEN	Thailand	Tak	15.1104	101.015	16.715	98.7911	2008	AS-SE-W	S258L/F313S	PD1110-C	M74I/N75E/K76T/A220S/Q271E/N326S/I356T/R371I
5655	PD1111-C	1125-PF-TH-NOSTEN	Thailand	Tak	15.1104	101.015	16.715	98.7911	2008	AS-SE-W	S258L/F313S	PD1111-C	M74I/N75E/K76T/A220S/Q271E/N326S/I356T/R371I
5656	PD1112-C	1125-PF-TH-NOSTEN	Thailand	Tak	15.1104	101.015	16.715	98.7911	2008	AS-SE-W	S258L/F313S	PD1112-C	M74I/N75E/K76T/A220S/Q271E/N326S/I356T/R371I
5657	PD1116-C	1125-PF-TH-NOSTEN	Thailand	Tak	15.1104	101.015	16.715	98.7911	2008	AS-SE-W	S258L/F313S	PD1116-C	M74I/N75E/K76T/A220S/Q271E/N326S/I356T/R371I
5659	PD1118-C	1125-PF-TH-NOSTEN	Thailand	Tak	15.1104	101.015	16.715	98.7911	2008	AS-SE-W	S258L/F313S	PD1118-C	M74I/N75E/K76T/A220S/Q271E/N326S/I356T/R371I
5663	PD1119-C	1125-PF-TH-NOSTEN	Thailand	Tak	15.1104	101.015	16.715	98.7911	2008	AS-SE-W	S258L/F313S	PD1119-C	M74I/N75E/K76T/A220S/Q271E/N326S/I356T/R371I
5664	PD1121-C	1125-PF-TH-NOSTEN	Thailand	Tak	15.1104	101.015	16.715	98.7911	2008	AS-SE-W	S258L/F313S	PD1121-C	M74I/N75E/K76T/A220S/Q271E/N326S/I356T/R371I
5681	PD1125-C	1125-PF-TH-NOSTEN	Thailand	Tak	15.1104	101.015	16.715	98.7911	2008	AS-SE-W	S258L/F313S	PD1125-C	M74I/N75E/K76T/A220S/Q271E/N326S/I356T/R371I
5682	PD1126-C	1125-PF-TH-NOSTEN	Thailand	Tak	15.1104	101.015	16.715	98.7911	2008	AS-SE-W	S258L/F313S	PD1126-C	M74I/N75E/K76T/A220S/Q271E/N326S/I356T/R371I
5691	PD1127-C	1125-PF-TH-NOSTEN	Thailand	Tak	15.1104	101.015	16.715	98.7911	2008	AS-SE-W	S258L/F313S	PD1127-C	M74I/N75E/K76T/A220S/Q271E/N326S/I356T/R371I
5695	PD1130-C	1125-PF-TH-NOSTEN	Thailand	Tak	15.1104	101.015	16.715	98.7911	2008	AS-SE-W	S258L/F313S	PD1130-C	M74I/N75E/K76T/A220S/Q271E/N326S/I356T/R371I
5707	PD1131-C	1125-PF-TH-NOSTEN	Thailand	Tak	15.1104	101.015	16.715	98.7911	2008	AS-SE-W	S258L/F313S	PD1131-C	M74I/N75E/K76T/A220S/Q271E/N326S/I356T/R371I
5709	PD0787-C	1125-PF-TH-NOSTEN	Thailand	Tak	15.1104	101.015	16.715	98.7911	2009	AS-SE-W	S258L/F313S	PD0787-C	M74I/N75E/K76T/A220S/Q271E/N326S/I356T/R371I
5739	PD1134-C	1125-PF-TH-NOSTEN	Thailand	Tak	15.1104	101.015	16.715	98.7911	2009	AS-SE-W	S258L/F313S	PD1134-C	M74I/N75E/K76T/A220S/Q271E/N326S/I356T/R371I
5798	PD1137-C	1125-PF-TH-NOSTEN	Thailand	Tak	15.1104	101.015	16.715	98.7911	2009	AS-SE-W	S258L/F313S	PD1137-C	M74I/N75E/K76T/A220S/Q271E/N326S/I356T/R371I
5849	PD1138-C	1125-PF-TH-NOSTEN	Thailand	Tak	15.1104	101.015	16.715	98.7911	2009	AS-SE-W	S258L/F313S	PD1138-C	M74I/N75E/K76T/A220S/Q271E/N326S/I356T/R371I
5861	PD1140-C	1125-PF-TH-NOSTEN	Thailand	Tak	15.1104	101.015	16.715	98.7911	2009	AS-SE-W	S258L/F313S	PD1140-C	M74I/N75E/K76T/A220S/Q271E/N326S/I356T/R371I
5862	PD1147-C	1125-PF-TH-NOSTEN	Thailand	Tak	15.1104	101.015	16.715	98.7911	2009	AS-SE-W	S258L/F313S	PD1147-C	M74I/N75E/K76T/A220S/Q271E/N326S/I356T/R371I
5865	PD0789-C	1125-PF-TH-NOSTEN	Thailand	Tak	15.1104	101.015	16.715	98.7911	2010	AS-SE-W	S258L/F313S	PD0789-C	M74I/N75E/K76T/A220S/Q271E/N326S/I356T/R371I
5910	PD0791-C	1125-PF-TH-NOSTEN	Thailand	Tak	15.1104	101.015	16.715	98.7911	2010	AS-SE-W	S258L/F313S	PD0791-C	M74I/N75E/K76T/A220S/Q271E/N326S/I356T/R371I
5921	PD0794-C	1125-PF-TH-NOSTEN	Thailand	Tak	15.1104	101.015	16.715	98.7911	2010	AS-SE-W	S258L/F313S	PD0794-C	M74I/N75E/K76T/A220S/Q271E/N326S/I356T/R371I
5933	PD0795-C	1125-PF-TH-NOSTEN	Thailand	Tak	15.1104	101.015	16.715	98.7911	2010	AS-SE-W	S258L/F313S	PD0795-C	M74I/N75E/K76T/A220S/Q271E/N326S/I356T/R371I
5940	PD0923-C	1125-PF-TH-NOSTEN	Thailand	Tak	15.1104	101.015	16.715	98.7911	2010	AS-SE-W	S258L/F313S	PD0923-C	M74I/N75E/K76T/A220S/Q271E/N326S/I356T/R371I
5944	PD1148-C	1125-PF-TH-NOSTEN	Thailand	Tak	15.1104	101.015	16.715	98.7911	2010	AS-SE-W	S258L/F313S	PD1148-C	M74I/N75E/K76T/A220S/Q271E/N326S/I356T/R371I
6000	PD1149-C	1125-PF-TH-NOSTEN	Thailand	Tak	15.1104	101.015	16.715	98.7911	2010	AS-SE-W	S258L/F313S	PD1149-C	M74I/N75E/K76T/A220S/Q271E/N326S/I356T/R371I
6004	PD1150-C	1125-PF-TH-NOSTEN	Thailand	Tak	15.1104	101.015	16.715	98.7911	2010	AS-SE-W	S258L/F313S	PD1150-C	M74I/N75E/K76T/A220S/Q271E/N326S/I356T/R371I
6015	PD1151-C	1125-PF-TH-NOSTEN	Thailand	Tak	15.1104	101.015	16.715	98.7911	2010	AS-SE-W	S258L/F313S	PD1151-C	M74I/N75E/K76T/A220S/Q271E/N326S/I356T/R371I
6019	PD0464-C	1052-PF-TRAC-WHITE	Thailand	Tak	15.1104	101.015	16.715	98.7911	2011	AS-SE-W	S258L/F313S	PD0464-C	M74I/N75E/K76T/A220S/Q271E/N326S/I356T/R371I
6022	PD0466-C	1052-PF-TRAC-WHITE	Thailand	Tak	15.1104	101.015	16.715	98.7911	2011	AS-SE-W	S258L/F313S	PD0466-C	M74I/N75E/K76T/A220S/Q271E/N326S/I356T/R371I
6034	PD0470-C	1052-PF-TRAC-WHITE	Thailand	Tak	15.1104	101.015	16.715	98.7911	2011	AS-SE-W	S258L/F313S	PD0470-C	M74I/N75E/K76T/A220S/Q271E/N326S/I356T/R371I
6037	PD0471-C	1052-PF-TRAC-WHITE	Thailand	Tak	15.1104	101.015	16.715	98.7911	2011	AS-SE-W	S258L/F313S	PD0471-C	M74I/N75E/K76T/A220S/Q271E/N326S/I356T/R371I
6047	PD0475-C	1052-PF-TRAC-WHITE	Thailand	Tak	15.1104	101.015	16.715	98.7911	2011	AS-SE-W	S258L/F313S	PD0475-C	M74I/N75E/K76T/A220S/Q271E/N326S/I356T/R371I
6063	PD0476-C	1052-PF-TRAC-WHITE	Thailand	Tak	15.1104	101.015	16.715	98.7911	2011	AS-SE-W	S258L/F313S	PD0476-C	M74I/N75E/K76T/A220S/Q271E/N326S/I356T/R371I
6076	PD0489-C	1052-PF-TRAC-WHITE	Thailand	Tak	15.1104	101.015	16.715	98.7911	2011	AS-SE-W	S258L/F313S	PD0489-C	M74I/N75E/K76T/A220S/Q271E/N326S/I356T/R371I
6077	PD0491-C	1052-PF-TRAC-WHITE	Thailand	Tak	15.1104	101.015	16.715	98.7911	2011	AS-SE-W	S258L/F313S	PD0491-C	M74I/N75E/K76T/A220S/Q271E/N326S/I356T/R371I
6085	PD0492-C	1052-PF-TRAC-WHITE	Thailand	Tak	15.1104	101.015	16.715	98.7911	2011	AS-SE-W	S258L/F313S	PD0492-C	M74I/N75E/K76T/A220S/Q271E/N326S/I356T/R371I
6087	PD0498-C	1052-PF-TRAC-WHITE	Thailand	Sisakhet	15.1104	101.015	14.8559	104.371	2011	AS-SE-E	S258L/F313S	PD0498-C	M74I/N75E/K76T/A220S/Q271E/N326S/I356T/R371I
6088	PD0500-C	1052-PF-TRAC-WHITE	Thailand	Sisakhet	15.1104	101.015	14.8559	104.371	2011	AS-SE-E	S258L/F313S	PD0500-C	M74I/N75E/K76T/A220S/Q271E/N326S/I356T/R371I
6089	PD0501-C	1052-PF-TRAC-WHITE	Thailand	Sisakhet	15.1104	101.015	14.8559	104.371	2011	AS-SE-E	S258L/F313S	PD0501-C	M74I/N75E/K76T/A220S/Q271E/N326S/I356T/R371I
6096	PD0502-C	1052-PF-TRAC-WHITE	Thailand	Sisakhet	15.1104	101.015	14.8559	104.371	2011	AS-SE-E	S258L/F313S	PD0502-C	M74I/N75E/K76T/A220S/Q271E/N326S/I356T/R371I
6097	PD0503-C	1052-PF-TRAC-WHITE	Thailand	Ranong	15.1104	101.015	9.96664	98.7005	2011	AS-SE-W	S258L/F313S	PD0503-C	M74I/N75E/K76T/H97L/A220S/Q271E/N326S/I356T/R371I
6098	PD0504-C	1052-PF-TRAC-WHITE	Thailand	Ranong	15.1104	101.015	9.96664	98.7005	2011	AS-SE-W	S258L/F313S	PD0504-C	M74I/N75E/K76T/A220S/Q271E/N326S/I356T/R371I
6104	PD0505-C	1052-PF-TRAC-WHITE	Thailand	Ranong	15.1104	101.015	9.96664	98.7005	2011	AS-SE-W	S258L/F313S	PD0505-C	M74I/N75E/K76T/A220S/Q271E/N326S/I356T/R371I
6105	PD0506-C	1052-PF-TRAC-WHITE	Thailand	Ranong	15.1104	101.015	9.96664	98.7005	2011	AS-SE-W	S258L/F313S	PD0506-C	M74I/N75E/K76T/A220S/Q271E/N326S/I356T/R371I
6106	PD0508-C	1052-PF-TRAC-WHITE	Thailand	Ranong	15.1104	101.015	9.96664	98.7005	2011	AS-SE-W	S258L/F313S	PD0508-C	M74I/N75E/K76T/A220S/Q271E/N326S/I356T/R371I
6107	PD0509-Cx2	1052-PF-TRAC-WHITE	Thailand	Ranong	15.1104	101.015	9.96664	98.7005	2011	AS-SE-W	S258L/F313S	PD0509-Cx2	M74I/N75E/K76T/A220S/Q271E/N326S/I356T/R371I
6118	PD0511-C	1052-PF-TRAC-WHITE	Thailand	Tak	15.1104	101.015	16.715	98.7911	2011	AS-SE-W	S258L/F313S	PD0511-C	M74I/N75E/K76T/A220S/Q271E/N326S/I356T/R371I
6124	PD0550-C	1052-PF-TRAC-WHITE	Thailand	Tak	15.1104	101.015	16.715	98.7911	2011	AS-SE-W	S258L/F313S	PD0550-C	M74I/N75E/K76T/A220S/Q271E/N326S/I356T/R371I
6137	PD0552-C	1052-PF-TRAC-WHITE	Thailand	Tak	15.1104	101.015	16.715	98.7911	2011	AS-SE-W	S258L/F313S	PD0552-C	M74I/N75E/K76T/A220S/Q271E/N326S/I356T/R371I
6145	PD1156-C	1125-PF-TH-NOSTEN	Thailand	Tak	15.1104	101.015	16.715	98.7911	2011	AS-SE-W	S258L/F313S	PD1156-C	M74I/N75E/K76T/A220S/Q271E/N326S/I356T/R371I
6165	PD1157-C	1125-PF-TH-NOSTEN	Thailand	Tak	15.1104	101.015	16.715	98.7911	2011	AS-SE-W	S258L/F313S	PD1157-C	M74I/N75E/K76T/A220S/Q271E/N326S/I356T/R371I
6166	PD1158-C	1125-PF-TH-NOSTEN	Thailand	Tak	15.1104	101.015	16.715	98.7911	2011	AS-SE-W	S258L/F313S	PD1158-C	M74I/N75E/K76T/A220S/Q271E/N326S/I356T/R371I
6175	PD1160-C	1125-PF-TH-NOSTEN	Thailand	Tak	15.1104	101.015	16.715	98.7911	2011	AS-SE-W	S258L/F313S	PD1160-C	M74I/N75E/K76T/A220S/Q271E/N326S/I356T/R371I
6177	PD1161-C	1125-PF-TH-NOSTEN	Thailand	Tak	15.1104	101.015	16.715	98.7911	2011	AS-SE-W	S258L/F313S	PD1161-C	M74I/N75E/K76T/A220S/Q271E/N326S/I356T/R371I
6182	PD1162-C	1125-PF-TH-NOSTEN	Thailand	Tak	15.1104	101.015	16.715	98.7911	2011	AS-SE-W	S258L/F313S	PD1162-C	M74I/N75E/K76T/A220S/Q271E/N326S/I356T/R371I
6194	PD1164-C	1125-PF-TH-NOSTEN	Thailand	Tak	15.1104	101.015	16.715	98.7911	2011	AS-SE-W	S258L/F313S	PD1164-C	M74I/N75E/K76T/A220S/Q271E/N326S/I356T/R371I
6207	PD0481-C	1052-PF-TRAC-WHITE	Thailand	Tak	15.1104	101.015	16.715	98.7911	2012	AS-SE-W	S258L/F313S	PD0481-C	M74I/N75E/K76T/A220S/Q271E/N326S/I356T/R371I
6250	PD0482-C	1052-PF-TRAC-WHITE	Thailand	Tak	15.1104	101.015	16.715	98.7911	2012	AS-SE-W	S258L/F313S	PD0482-C	M74I/N75E/K76T/A220S/Q271E/N326S/I356T/R371I
6252	PD0483-C	1052-PF-TRAC-WHITE	Thailand	Tak	15.1104	101.015	16.715	98.7911	2012	AS-SE-W	S258L/F313S	PD0483-C	M74I/N75E/K76T/A220S/Q271E/N326S/I356T/R371I
6253	PD0484-C	1052-PF-TRAC-WHITE	Thailand	Tak	15.1104	101.015	16.715	98.7911	2012	AS-SE-W	S258L/F313S	PD0484-C	M74I/N75E/K76T/A220S/Q271E/N326S/I356T/R371I
6256	PD0487-C	1052-PF-TRAC-WHITE	Thailand	Tak	15.1104	101.015	16.715	98.7911	2012	AS-SE-W	S258L/F313S	PD0487-C	M74I/N75E/K76T/A220S/Q271E/N326S/I356T/R371I
6257	PD0488-C	1052-PF-TRAC-WHITE	Thailand	Tak	15.1104	101.015	16.715	98.7911	2012	AS-SE-W	S258L/F313S	PD0488-C	M74I/N75E/K76T/A220S/Q271E/N326S/I356T/R371I
6258	PD0494-C	1052-PF-TRAC-WHITE	Thailand	Tak	15.1104	101.015	16.715	98.7911	2012	AS-SE-W	S258L/F313S	PD0494-C	M74I/N75E/K76T/A220S/Q271E/N326S/I356T/R371I
6263	PD0516-C	1052-PF-TRAC-WHITE	Thailand	Tak	15.1104	101.015	16.715	98.7911	2012	AS-SE-W	S258L/F313S	PD0516-C	M74I/N75E/K76T/A220S/Q271E/N326S/I356T/R371I
6264	PD0518-C	1052-PF-TRAC-WHITE	Thailand	Tak	15.1104	101.015	16.715	98.7911	2012	AS-SE-W	S258L/F313S	PD0518-C	M74I/N75E/K76T/A220S/Q271E/N326S/I356T/R371I
6266	PD0519-C	1052-PF-TRAC-WHITE	Thailand	Tak	15.1104	101.015	16.715	98.7911	2012	AS-SE-W	S258L/F313S	PD0519-C	M74I/N75E/K76T/A220S/Q271E/N326S/I356T/R371I
6278	PD0524-C	1052-PF-TRAC-WHITE	Thailand	Tak	15.1104	101.015	16.715	98.7911	2012	AS-SE-W	S258L/F313S	PD0524-C	M74I/N75E/K76T/A220S/Q271E/N326S/I356T/R371I
6283	PD0526-C	1052-PF-TRAC-WHITE	Thailand	Tak	15.1104	101.015	16.715	98.7911	2012	AS-SE-W	S258L/F313S	PD0526-C	M74I/N75E/K76T/A220S/Q271E/N326S/I356T/R371I
6285	PD0527-C	1052-PF-TRAC-WHITE	Thailand	Tak	15.1104	101.015	16.715	98.7911	2012	AS-SE-W	S258L/F313S	PD0527-C	M74I/N75E/K76T/A220S/Q271E/N326S/I356T/R371I
6302	PD0530-C	1052-PF-TRAC-WHITE	Thailand	Tak	15.1104	101.015	16.715	98.7911	2012	AS-SE-W	S258L/F313S	PD0530-C	M74I/N75E/K76T/A220S/Q271E/N326S/I356T/R371I
6351	PD0531-C	1052-PF-TRAC-WHITE	Thailand	Tak	15.1104	101.015	16.715	98.7911	2012	AS-SE-W	S258L/F313S	PD0531-C	M74I/N75E/K76T/A220S/Q271E/N326S/I356T/R371I
6353	PD0532-C	1052-PF-TRAC-WHITE	Thailand	Tak	15.1104	101.015	16.715	98.7911	2012	AS-SE-W	S258L/F313S	PD0532-C	M74I/N75E/K76T/A220S/Q271E/N326S/I356T/R371I
6370	PD0533-C	1052-PF-TRAC-WHITE	Thailand	Tak	15.1104	101.015	16.715	98.7911	2012	AS-SE-W	S258L/F313S	PD0533-C	M74I/N75E/K76T/A220S/Q271E/N326S/I356T/R371I
6371	PD0535-C	1052-PF-TRAC-WHITE	Thailand	Tak	15.1104	101.015	16.715	98.7911	2012	AS-SE-W	S258L/F313S	PD0535-C	M74I/N75E/K76T/A220S/Q271E/N326S/I356T/R371I
6372	PD0540-C	1052-PF-TRAC-WHITE	Thailand	Tak	15.1104	101.015	16.715	98.7911	2012	AS-SE-W	S258L/F313S	PD0540-C	M74I/N75E/K76T/A220S/Q271E/N326S/I356T/R371I
6376	PD0543-C	1052-PF-TRAC-WHITE	Thailand	Tak	15.1104	101.015	16.715	98.7911	2012	AS-SE-W	S258L/F313S	PD0543-C	M74I/N75E/K76T/A220S/Q271E/N326S/I356T/R371I
6382	PD0545-C	1052-PF-TRAC-WHITE	Thailand	Tak	15.1104	101.015	16.715	98.7911	2012	AS-SE-W	S258L/F313S	PD0545-C	M74I/N75E/K76T/A220S/Q271E/N326S/I356T/R371I
6390	PD0546-C	1052-PF-TRAC-WHITE	Thailand	Tak	15.1104	101.015	16.715	98.7911	2012	AS-SE-W	S258L/F313S	PD0546-C	M74I/N75E/K76T/A220S/Q271E/N326S/I356T/R371I
6391	PD0547-C	1052-PF-TRAC-WHITE	Thailand	Tak	15.1104	101.015	16.715	98.7911	2012	AS-SE-W	S258L/F313S	PD0547-C	M74I/N75E/K76T/A220S/Q271E/N326S/I356T/R371I
6485	PD0549-C	1052-PF-TRAC-WHITE	Thailand	Tak	15.1104	101.015	16.715	98.7911	2012	AS-SE-W	S258L/F313S	PD0549-C	M74I/N75E/K76T/A220S/Q271E/N326S/I356T/R371I
6508	PD0554-C	1052-PF-TRAC-WHITE	Thailand	Tak	15.1104	101.015	16.715	98.7911	2012	AS-SE-W	S258L/F313S	PD0554-C	M74I/N75E/K76T/A220S/Q271E/N326S/I356T/R371I
6513	PD0555-C	1052-PF-TRAC-WHITE	Thailand	Tak	15.1104	101.015	16.715	98.7911	2012	AS-SE-W	S258L/F313S	PD0555-C	M74I/N75E/K76T/A220S/Q271E/N326S/I356T/R371I
6536	PD0556-C	1052-PF-TRAC-WHITE	Thailand	Tak	15.1104	101.015	16.715	98.7911	2012	AS-SE-W	S258L/F313S	PD0556-C	M74I/N75E/K76T/A220S/Q271E/N326S/I356T/R371I
6542	PD0558-C	1052-PF-TRAC-WHITE	Thailand	Tak	15.1104	101.015	16.715	98.7911	2012	AS-SE-W	S258L/F313S	PD0558-C	M74I/N75E/K76T/A220S/Q271E/N326S/I356T/R371I
6562	PD0559-C	1052-PF-TRAC-WHITE	Thailand	Tak	15.1104	101.015	16.715	98.7911	2012	AS-SE-W	S258L/F313S	PD0559-C	M74I/N75E/K76T/A220S/Q271E/N326S/I356T/R371I
6571	PD0563-C	1052-PF-TRAC-WHITE	Thailand	Tak	15.1104	101.015	16.715	98.7911	2012	AS-SE-W	S258L/F313S	PD0563-C	M74I/N75E/K76T/A220S/Q271E/N326S/I356T/R371I
6573	PD0564-C	1052-PF-TRAC-WHITE	Thailand	Tak	15.1104	101.015	16.715	98.7911	2012	AS-SE-W	S258L/F313S	PD0564-C	M74I/N75E/K76T/A220S/Q271E/N326S/I356T/R371I
6575	PD0565-C	1052-PF-TRAC-WHITE	Thailand	Tak	15.1104	101.015	16.715	98.7911	2012	AS-SE-W	S258L/F313S	PD0565-C	M74I/N75E/K76T/A220S/Q271E/N326S/I356T/R371I
6581	PD0567-C	1052-PF-TRAC-WHITE	Thailand	Tak	15.1104	101.015	16.715	98.7911	2012	AS-SE-W	S258L/F313S	PD0567-C	M74I/N75E/K76T/A220S/Q271E/N326S/I356T/R371I
6582	PD0569-C	1052-PF-TRAC-WHITE	Thailand	Tak	15.1104	101.015	16.715	98.7911	2012	AS-SE-W	S258L/F313S	PD0569-C	M74I/N75E/K76T/A220S/Q271E/N326S/I356T/R371I
6583	PD0575-C	1052-PF-TRAC-WHITE	Thailand	Sisakhet	15.1104	101.015	14.8559	104.371	2012	AS-SE-E	S258L/F313S	PD0575-C	M74I/N75E/K76T/A220S/Q271E/N326S/I356T/R371I
6584	PD0576-C	1052-PF-TRAC-WHITE	Thailand	Sisakhet	15.1104	101.015	14.8559	104.371	2012	AS-SE-E	S258L/F313S	PD0576-C	M74I/N75E/K76T/A220S/Q271E/N326S/I356T/R371I
6589	PD0578-C	1052-PF-TRAC-WHITE	Thailand	Sisakhet	15.1104	101.015	14.8559	104.371	2012	AS-SE-E	S258L/F313S	PD0578-C	M74I/N75E/K76T/A220S/Q271E/N326S/I356T/R371I
6590	PD0579-C	1052-PF-TRAC-WHITE	Thailand	Sisakhet	15.1104	101.015	14.8559	104.371	2012	AS-SE-E	S258L/F313S	PD0579-C	M74I/N75E/K76T/A220S/Q271E/N326S/I356T/R371I
6605	PD0580-C	1052-PF-TRAC-WHITE	Thailand	Sisakhet	15.1104	101.015	14.8559	104.371	2012	AS-SE-E	S258L/F313S	PD0580-C	M74I/N75E/K76T/A220S/Q271E/N326S/I356T/R371I
6607	PD0581-C	1052-PF-TRAC-WHITE	Thailand	Ranong	15.1104	101.015	9.96664	98.7005	2012	AS-SE-W	S258L/F313S	PD0581-C	M74I/N75E/K76T/A220S/Q271E/N326S/I356T/R371I
6608	PD0590-C	1052-PF-TRAC-WHITE	Thailand	Ranong	15.1104	101.015	9.96664	98.7005	2012	AS-SE-W	S258L/F313S	PD0590-C	M74I/N75E/K76T/A220S/Q271E/N326S/I356T/R371I
6611	PD0591-C	1052-PF-TRAC-WHITE	Thailand	Ranong	15.1104	101.015	9.96664	98.7005	2012	AS-SE-W	S258L/F313S	PD0591-C	M74I/N75E/K76T/A220S/Q271E/N326S/I356T/R371I
6612	PD0592-C	1052-PF-TRAC-WHITE	Thailand	Ranong	15.1104	101.015	9.96664	98.7005	2012	AS-SE-W	S258L/F313S	PD0592-C	M74I/N75E/K76T/A220S/Q271E/N326S/I356T/R371I
6616	PD0632-C	1052-PF-TRAC-WHITE	Thailand	Tak	15.1104	101.015	16.715	98.7911	2012	AS-SE-W	S258L/F313S	PD0632-C	M74I/N75E/K76T/A220S/Q271E/N326S/I356T/R371I
6623	PD0636-C	1052-PF-TRAC-WHITE	Thailand	Tak	15.1104	101.015	16.715	98.7911	2012	AS-SE-W	S258L/F313S	PD0636-C	M74I/N75E/K76T/A220S/Q271E/N326S/I356T/R371I
6626	PD0651-C	1052-PF-TRAC-WHITE	Thailand	Sisakhet	15.1104	101.015	14.8559	104.371	2012	AS-SE-E	S258L/F313S	PD0651-C	M74I/N75E/K76T/A220S/Q271E/N326S/I356T/R371I
6627	PD0658-C	1052-PF-TRAC-WHITE	Thailand	Sisakhet	15.1104	101.015	14.8559	104.371	2012	AS-SE-E	S258L/F313S	PD0658-C	M74I/N75E/K76T/A220S/Q271E/N326S/I356T/R371I
6630	PD0659-C	1052-PF-TRAC-WHITE	Thailand	Sisakhet	15.1104	101.015	14.8559	104.371	2012	AS-SE-E	S258L/F313S	PD0659-C	M74I/N75E/K76T/A220S/Q271E/N326S/I356T/R371I
6649	PD0662-C	1052-PF-TRAC-WHITE	Thailand	Sisakhet	15.1104	101.015	14.8559	104.371	2012	AS-SE-E	S258L/F313S	PD0662-C	M74I/N75E/K76T/L196P/A220S/Q271E/N326S/I356T/R371I
6650	PD0663-C	1052-PF-TRAC-WHITE	Thailand	Sisakhet	15.1104	101.015	14.8559	104.371	2012	AS-SE-E	S258L/F313S	PD0663-C	M74I/N75E/K76T/A220S/Q271E/N326S/I356T/R371I
6651	PD0664-C	1052-PF-TRAC-WHITE	Thailand	Sisakhet	15.1104	101.015	14.8559	104.371	2012	AS-SE-E	S258L/F313S	PD0664-C	M74I/N75E/K76T/L196P/A220S/Q271E/N326S/I356T/R371I
6653	PD0799-C	1125-PF-TH-NOSTEN	Thailand	Tak	15.1104	101.015	16.715	98.7911	2012	AS-SE-W	S258L/F313S	PD0799-C	M74I/N75E/K76T/A220S/Q271E/N326S/I356T/R371I
6661	PD0800-C	1125-PF-TH-NOSTEN	Thailand	Tak	15.1104	101.015	16.715	98.7911	2012	AS-SE-W	S258L/F313S	PD0800-C	M74I/N75E/K76T/A220S/Q271E/N326S/I356T/R371I
6662	PD0804-C	1125-PF-TH-NOSTEN	Thailand	Tak	15.1104	101.015	16.715	98.7911	2012	AS-SE-W	S258L/F313S	PD0804-C	M74I/N75E/K76T/A220S/Q271E/N326S/I356T/R371I
6663	PD0806-C	1125-PF-TH-NOSTEN	Thailand	Tak	15.1104	101.015	16.715	98.7911	2012	AS-SE-W	S258L/F313S	PD0806-C	M74I/N75E/K76T/A220S/Q271E/N326S/I356T/R371I
6670	PD1167-C	1125-PF-TH-NOSTEN	Thailand	Tak	15.1104	101.015	16.715	98.7911	2012	AS-SE-W	S258L/F313S	PD1167-C	M74I/N75E/K76T/A220S/Q271E/N326S/I356T/R371I
6673	PD1168-C	1125-PF-TH-NOSTEN	Thailand	Tak	15.1104	101.015	16.715	98.7911	2012	AS-SE-W	S258L/F313S	PD1168-C	M74I/N75E/K76T/A220S/Q271E/N326S/I356T/R371I
6675	PD1169-C	1125-PF-TH-NOSTEN	Thailand	Tak	15.1104	101.015	16.715	98.7911	2012	AS-SE-W	S258L/F313S	PD1169-C	M74I/N75E/K76T/A220S/Q271E/N326S/I356T/R371I
6676	PD1171-C	1125-PF-TH-NOSTEN	Thailand	Tak	15.1104	101.015	16.715	98.7911	2012	AS-SE-W	S258L/F313S	PD1171-C	M74I/N75E/K76T/A220S/Q271E/N326S/I356T/R371I
6706	PD1173-C	1125-PF-TH-NOSTEN	Thailand	Tak	15.1104	101.015	16.715	98.7911	2012	AS-SE-W	S258L/F313S	PD1173-C	M74I/N75E/K76T/A220S/Q271E/N326S/I356T/R371I
6707	PD1178-C	1125-PF-TH-NOSTEN	Thailand	Tak	15.1104	101.015	16.715	98.7911	2012	AS-SE-W	S258L/F313S	PD1178-C	M74I/N75E/K76T/A220S/Q271E/N326S/I356T/R371I
6726	PD1180-C	1125-PF-TH-NOSTEN	Thailand	Tak	15.1104	101.015	16.715	98.7911	2012	AS-SE-W	S258L/F313S	PD1180-C	M74I/N75E/K76T/A220S/Q271E/N326S/I356T/R371I
6727	PD0667-C	1052-PF-TRAC-WHITE	Thailand	Sisakhet	15.1104	101.015	14.8559	104.371	2013	AS-SE-E	S258L/F313S	PD0667-C	M74I/N75E/K76T/A220S/Q271E/N326S/I356T/R371I
6728	PD0668-C	1052-PF-TRAC-WHITE	Thailand	Sisakhet	15.1104	101.015	14.8559	104.371	2013	AS-SE-E	S258L/F313S	PD0668-C	M74I/N75E/K76T/A220S/Q271E/N326S/I356T/R371I
6729	PD0670-C	1052-PF-TRAC-WHITE	Thailand	Sisakhet	15.1104	101.015	14.8559	104.371	2013	AS-SE-E	S258L/F313S	PD0670-C	M74I/N75E/K76T/L196P/A220S/Q271E/N326S/I356T/R371I
6730	PD0808-C	1125-PF-TH-NOSTEN	Thailand	Tak	15.1104	101.015	16.715	98.7911	2013	AS-SE-W	S258L/F313S	PD0808-C	M74I/N75E/K76T/A220S/Q271E/N326S/I356T/R371I
6744	PD0814-C	1125-PF-TH-NOSTEN	Thailand	Tak	15.1104	101.015	16.715	98.7911	2013	AS-SE-W	S258L/F313S	PD0814-C	M74I/N75E/K76T/A220S/Q271E/N326S/I356T/R371I
6745	PD0816-C	1125-PF-TH-NOSTEN	Thailand	Tak	15.1104	101.015	16.715	98.7911	2013	AS-SE-W	S258L/F313S	PD0816-C	M74I/N75E/K76T/A220S/Q271E/N326S/I356T/R371I
6747	PD0817-C	1125-PF-TH-NOSTEN	Thailand	Tak	15.1104	101.015	16.715	98.7911	2013	AS-SE-W	S258L/F313S	PD0817-C	M74I/N75E/K76T/A220S/Q271E/N326S/I356T/R371I
6760	PD0818-C	1125-PF-TH-NOSTEN	Thailand	Tak	15.1104	101.015	16.715	98.7911	2013	AS-SE-W	S258L/F313S	PD0818-C	M74I/N75E/K76T/A220S/Q271E/N326S/I356T/R371I
6761	PD0819-C	1125-PF-TH-NOSTEN	Thailand	Tak	15.1104	101.015	16.715	98.7911	2013	AS-SE-W	S258L/F313S	PD0819-C	M74I/N75E/K76T/A220S/Q271E/N326S/I356T/R371I
6762	PD0820-C	1125-PF-TH-NOSTEN	Thailand	Tak	15.1104	101.015	16.715	98.7911	2013	AS-SE-W	S258L/F313S	PD0820-C	M74I/N75E/K76T/A220S/Q271E/N326S/I356T/R371I
6763	PD0821-C	1125-PF-TH-NOSTEN	Thailand	Tak	15.1104	101.015	16.715	98.7911	2013	AS-SE-W	S258L/F313S	PD0821-C	M74I/N75E/K76T/A220S/Q271E/N326S/I356T/R371I
6766	PD0822-C	1125-PF-TH-NOSTEN	Thailand	Tak	15.1104	101.015	16.715	98.7911	2013	AS-SE-W	S258L/F313S	PD0822-C	M74I/N75E/K76T/A220S/Q271E/N326S/I356T/R371I
6767	PD0823-C	1125-PF-TH-NOSTEN	Thailand	Tak	15.1104	101.015	16.715	98.7911	2013	AS-SE-W	S258L/F313S	PD0823-C	M74I/N75E/K76T/A220S/Q271E/N326S/I356T/R371I
6768	PD0824-C	1125-PF-TH-NOSTEN	Thailand	Tak	15.1104	101.015	16.715	98.7911	2013	AS-SE-W	S258L/F313S	PD0824-C	M74I/N75E/K76T/A220S/Q271E/N326S/I356T/R371I
6769	PD0825-C	1125-PF-TH-NOSTEN	Thailand	Tak	15.1104	101.015	16.715	98.7911	2013	AS-SE-W	S258L/F313S	PD0825-C	M74I/N75E/K76T/A220S/Q271E/N326S/I356T/R371I
6770	PD0826-C	1125-PF-TH-NOSTEN	Thailand	Tak	15.1104	101.015	16.715	98.7911	2013	AS-SE-W	S258L/F313S	PD0826-C	M74I/N75E/K76T/A220S/Q271E/N326S/I356T/R371I
6779	PD0827-C	1125-PF-TH-NOSTEN	Thailand	Tak	15.1104	101.015	16.715	98.7911	2013	AS-SE-W	S258L/F313S	PD0827-C	M74I/N75E/K76T/A220S/Q271E/N326S/I356T/R371I
6780	PD0828-C	1125-PF-TH-NOSTEN	Thailand	Tak	15.1104	101.015	16.715	98.7911	2013	AS-SE-W	S258L/F313S	PD0828-C	M74I/N75E/K76T/A220S/Q271E/N326S/I356T/R371I
6811	PD0829-C	1125-PF-TH-NOSTEN	Thailand	Tak	15.1104	101.015	16.715	98.7911	2013	AS-SE-W	S258L/F313S	PD0829-C	M74I/N75E/K76T/A220S/Q271E/N326S/I356T/R371I
6813	PD0832-C	1125-PF-TH-NOSTEN	Thailand	Tak	15.1104	101.015	16.715	98.7911	2013	AS-SE-W	S258L/F313S	PD0832-C	M74I/N75E/K76T/A220S/Q271E/N326S/I356T/R371I
6823	PD0873-C	1125-PF-TH-NOSTEN	Thailand	Tak	15.1104	101.015	16.715	98.7911	2013	AS-SE-W	S258L/F313S	PD0873-C	M74I/N75E/K76T/A220S/Q271E/N326S/I356T/R371I
6826	PD0874-C	1125-PF-TH-NOSTEN	Thailand	Tak	15.1104	101.015	16.715	98.7911	2013	AS-SE-W	S258L/F313S	PD0874-C	M74I/N75E/K76T/A220S/Q271E/N326S/I356T/R371I
6828	PD0876-C	1125-PF-TH-NOSTEN	Thailand	Tak	15.1104	101.015	16.715	98.7911	2013	AS-SE-W	S258L/F313S	PD0876-C	M74I/N75E/K76T/A220S/Q271E/N326S/I356T/R371I
6829	PD0926-C	1125-PF-TH-NOSTEN	Thailand	Tak	15.1104	101.015	16.715	98.7911	2013	AS-SE-W	S258L/F313S	PD0926-C	M74I/N75E/K76T/A220S/Q271E/N326S/I356T/R371I
6831	PD0927-C	1125-PF-TH-NOSTEN	Thailand	Tak	15.1104	101.015	16.715	98.7911	2013	AS-SE-W	S258L/F313S	PD0927-C	M74I/N75E/K76T/A220S/Q271E/N326S/I356T/R371I
6832	PD0929-C	1125-PF-TH-NOSTEN	Thailand	Tak	15.1104	101.015	16.715	98.7911	2013	AS-SE-W	S258L/F313S	PD0929-C	M74I/N75E/K76T/A220S/Q271E/N326S/I356T/R371I
6833	PD0931-C	1125-PF-TH-NOSTEN	Thailand	Tak	15.1104	101.015	16.715	98.7911	2013	AS-SE-W	S258L/F313S	PD0931-C	M74I/N75E/K76T/A220S/Q271E/N326S/I356T/R371I
6841	PD0932-C	1125-PF-TH-NOSTEN	Thailand	Tak	15.1104	101.015	16.715	98.7911	2013	AS-SE-W	S258L/F313S	PD0932-C	M74I/N75E/K76T/A220S/Q271E/N326S/I356T/R371I
6846	PD0933-C	1125-PF-TH-NOSTEN	Thailand	Tak	15.1104	101.015	16.715	98.7911	2013	AS-SE-W	S258L/F313S	PD0933-C	M74I/N75E/K76T/A220S/Q271E/N326S/I356T/R371I
6847	PD1188-C	1125-PF-TH-NOSTEN	Thailand	Tak	15.1104	101.015	16.715	98.7911	2013	AS-SE-W	S258L/F313S	PD1188-C	M74I/N75E/K76T/A220S/Q271E/N326S/I356T/R371I
6864	PD1190-C	1125-PF-TH-NOSTEN	Thailand	Tak	15.1104	101.015	16.715	98.7911	2013	AS-SE-W	S258L/F313S	PD1190-C	M74I/N75E/K76T/A220S/Q271E/N326S/I356T/R371I
6874	PD1194-C	1125-PF-TH-NOSTEN	Thailand	Tak	15.1104	101.015	16.715	98.7911	2013	AS-SE-W	S258L/F313S	PD1194-C	M74I/N75E/K76T/A220S/Q271E/N326S/I356T/R371I
8316	PD1196-C	1125-PF-TH-NOSTEN	Thailand	Tak	15.1104	101.015	16.715	98.7911	2013	AS-SE-W	S258L/F313S	PD1196-C	M74I/N75E/K76T/A220S/Q271E/N326S/I356T/R371I
10522	PD1199-C	1125-PF-TH-NOSTEN	Thailand	Tak	15.1104	101.015	16.715	98.7911	2013	AS-SE-W	S258L/F313S	PD1199-C	M74I/N75E/K76T/A220S/Q271E/N326S/I356T/R371I
10523	PD1200-C	1125-PF-TH-NOSTEN	Thailand	Tak	15.1104	101.015	16.715	98.7911	2013	AS-SE-W	S258L/F313S	PD1200-C	M74I/N75E/K76T/A220S/Q271E/N326S/I356T/R371I
6304	PD1201-C	1125-PF-TH-NOSTEN	Thailand	Tak	15.1104	101.015	16.715	98.7911	2013	AS-SE-W	S258L/F313S	PD1201-C	M74I/N75E/K76T/A220S/Q271E/N326S/I356T/R371I
6404	PD1202-C	1125-PF-TH-NOSTEN	Thailand	Tak	15.1104	101.015	16.715	98.7911	2013	AS-SE-W	S258L/F313S	PD1202-C	M74I/N75E/K76T/A220S/Q271E/N326S/I356T/R371I
6415	PD1204-C	1125-PF-TH-NOSTEN	Thailand	Tak	15.1104	101.015	16.715	98.7911	2013	AS-SE-W	S258L/F313S	PD1204-C	M74I/N75E/K76T/A220S/Q271E/N326S/I356T/R371I
6417	PD1206-C	1125-PF-TH-NOSTEN	Thailand	Tak	15.1104	101.015	16.715	98.7911	2013	AS-SE-W	S258L/F313S	PD1206-C	M74I/N75E/K76T/A220S/Q271E/N326S/I356T/R371I
6449	PD1208-C	1125-PF-TH-NOSTEN	Thailand	Tak	15.1104	101.015	16.715	98.7911	2013	AS-SE-W	S258L/F313S	PD1208-C	M74I/N75E/K76T/A220S/Q271E/N326S/I356T/R371I
6530	PD1210-C	1125-PF-TH-NOSTEN	Thailand	Tak	15.1104	101.015	16.715	98.7911	2013	AS-SE-W	S258L/F313S	PD1210-C	M74I/N75E/K76T/A220S/Q271E/N326S/I356T/R371I
6565	PD1211-C	1125-PF-TH-NOSTEN	Thailand	Tak	15.1104	101.015	16.715	98.7911	2013	AS-SE-W	S258L/F313S	PD1211-C	M74I/N75E/K76T/A220S/Q271E/N326S/I356T/R371I
6579	PD1212-C	1125-PF-TH-NOSTEN	Thailand	Tak	15.1104	101.015	16.715	98.7911	2013	AS-SE-W	S258L/F313S	PD1212-C	M74I/N75E/K76T/A220S/Q271E/N326S/I356T/R371I
6580	PD1215-C	1125-PF-TH-NOSTEN	Thailand	Tak	15.1104	101.015	16.715	98.7911	2013	AS-SE-W	S258L/F313S	PD1215-C	M74I/N75E/K76T/A220S/Q271E/N326S/I356T/R371I
6708	PD1218-C	1125-PF-TH-NOSTEN	Thailand	Tak	15.1104	101.015	16.715	98.7911	2013	AS-SE-W	S258L/F313S	PD1218-C	M74I/N75E/K76T/A220S/Q271E/N326S/I356T/R371I
6709	PD1219-C	1125-PF-TH-NOSTEN	Thailand	Tak	15.1104	101.015	16.715	98.7911	2013	AS-SE-W	S258L/F313S	PD1219-C	M74I/N75E/K76T/A220S/Q271E/N326S/I356T/R371I
6710	PD1221-C	1125-PF-TH-NOSTEN	Thailand	Tak	15.1104	101.015	16.715	98.7911	2013	AS-SE-W	S258L/F313S	PD1221-C	M74I/N75E/K76T/A220S/Q271E/N326S/I356T/R371I
6755	PD1222-C	1125-PF-TH-NOSTEN	Thailand	Tak	15.1104	101.015	16.715	98.7911	2013	AS-SE-W	S258L/F313S	PD1222-C	M74I/N75E/K76T/A220S/Q271E/N326S/I356T/R371I
6758	PD1223-C	1125-PF-TH-NOSTEN	Thailand	Tak	15.1104	101.015	16.715	98.7911	2013	AS-SE-W	S258L/F313S	PD1223-C	M74I/N75E/K76T/A220S/Q271E/N326S/I356T/R371I
6785	PD1224-C	1125-PF-TH-NOSTEN	Thailand	Tak	15.1104	101.015	16.715	98.7911	2013	AS-SE-W	S258L/F313S	PD1224-C	M74I/N75E/K76T/A220S/Q271E/N326S/I356T/R371I
6807	PD1225-C	1125-PF-TH-NOSTEN	Thailand	Tak	15.1104	101.015	16.715	98.7911	2013	AS-SE-W	S258L/F313S	PD1225-C	M74I/N75E/K76T/A220S/Q271E/N326S/I356T/R371I
6808	PD1226-C	1125-PF-TH-NOSTEN	Thailand	Tak	15.1104	101.015	16.715	98.7911	2013	AS-SE-W	S258L/F313S	PD1226-C	M74I/N75E/K76T/A220S/Q271E/N326S/I356T/R371I
6873	PD1229-C	1125-PF-TH-NOSTEN	Thailand	Tak	15.1104	101.015	16.715	98.7911	2013	AS-SE-W	S258L/F313S	PD1229-C	M74I/N75E/K76T/A220S/Q271E/N326S/I356T/R371I
6885	PD1231-C	1125-PF-TH-NOSTEN	Thailand	Tak	15.1104	101.015	16.715	98.7911	2013	AS-SE-W	S258L/F313S	PD1231-C	M74I/N75E/K76T/A220S/Q271E/N326S/I356T/R371I
6909	PD1232-C	1125-PF-TH-NOSTEN	Thailand	Tak	15.1104	101.015	16.715	98.7911	2013	AS-SE-W	S258L/F313S	PD1232-C	M74I/N75E/K76T/A220S/Q271E/N326S/I356T/R371I
6915	PD1233-C	1125-PF-TH-NOSTEN	Thailand	Tak	15.1104	101.015	16.715	98.7911	2013	AS-SE-W	S258L/F313S	PD1233-C	M74I/N75E/K76T/A220S/Q271E/N326S/I356T/R371I
6918	PD1234-C	1125-PF-TH-NOSTEN	Thailand	Tak	15.1104	101.015	16.715	98.7911	2013	AS-SE-W	S258L/F313S	PD1234-C	M74I/N75E/K76T/A220S/Q271E/N326S/I356T/R371I
6929	PD1236-C	1125-PF-TH-NOSTEN	Thailand	Tak	15.1104	101.015	16.715	98.7911	2013	AS-SE-W	S258L/F313S	PD1236-C	M74I/N75E/K76T/A220S/Q271E/N326S/I356T/R371I
6934	PD1244-C	1125-PF-TH-NOSTEN	Thailand	Tak	15.1104	101.015	16.715	98.7911	2013	AS-SE-W	S258L/F313S	PD1244-C	M74I/N75E/K76T/A220S/Q271E/N326S/I356T/R371I
6936	PD1247-C	1125-PF-TH-NOSTEN	Thailand	Tak	15.1104	101.015	16.715	98.7911	2013	AS-SE-W	S258L/F313S	PD1247-C	M74I/N75E/K76T/A220S/Q271E/N326S/I356T/R371I
6948	PD1249-C	1125-PF-TH-NOSTEN	Thailand	Tak	15.1104	101.015	16.715	98.7911	2013	AS-SE-W	S258L/F313S	PD1249-C	M74I/N75E/K76T/A220S/Q271E/N326S/I356T/R371I
6950	PD1250-C	1125-PF-TH-NOSTEN	Thailand	Tak	15.1104	101.015	16.715	98.7911	2013	AS-SE-W	S258L/F313S	PD1250-C	M74I/N75E/K76T/A220S/Q271E/N326S/I356T/R371I
6957	RCN03173	1125-PF-TH-NOSTEN	Thailand	Tak	15.1104	101.015	16.715	98.7911	2013	AS-SE-W	S258L/F313S	RCN03173	M74I/N75E/K76T/A220S/Q271E/N326S/I356T/R371I
6977	RCN03174	1125-PF-TH-NOSTEN	Thailand	Tak	15.1104	101.015	16.715	98.7911	2013	AS-SE-W	S258L/F313S	RCN03174	M74I/N75E/K76T/A220S/Q271E/N326S/I356T/R371I
6981	RCN03177	1125-PF-TH-NOSTEN	Thailand	Tak	15.1104	101.015	16.715	98.7911	2013	AS-SE-W	S258L/F313S	RCN03177	M74I/N75E/K76T/A220S/Q271E/N326S/I356T/R371I
7028	RCN03179	1125-PF-TH-NOSTEN	Thailand	Tak	15.1104	101.015	16.715	98.7911	2014	AS-SE-W	S258L/F313S	RCN03179	M74I/N75E/K76T/A220S/Q271E/N326S/I356T/R371I
7034	RCN03182	1125-PF-TH-NOSTEN	Thailand	Tak	15.1104	101.015	16.715	98.7911	2014	AS-SE-W	S258L/F313S	RCN03182	M74I/N75E/K76T/A220S/Q271E/N326S/I356T/R371I
7036	RCN03195	1125-PF-TH-NOSTEN	Thailand	Tak	15.1104	101.015	16.715	98.7911	2014	AS-SE-W	S258L/F313S	RCN03195	M74I/N75E/K76T/A220S/Q271E/N326S/I356T/R371I
7046	RCN03196	1125-PF-TH-NOSTEN	Thailand	Tak	15.1104	101.015	16.715	98.7911	2014	AS-SE-W	S258L/F313S	RCN03196	M74I/N75E/K76T/A220S/Q271E/N326S/I356T/R371I
7100	RCN03197	1125-PF-TH-NOSTEN	Thailand	Tak	15.1104	101.015	16.715	98.7911	2014	AS-SE-W	S258L/F313S	RCN03197	M74I/N75E/K76T/A220S/Q271E/N326S/I356T/R371I
7101	RCN03186	1125-PF-TH-NOSTEN	Thailand	Tak	15.1104	101.015	16.715	98.7911	2015	AS-SE-W	S258L/F313S	RCN03186	M74I/N75E/K76T/A220S/Q271E/N326S/I356T/R371I
7105	RCN03191	1125-PF-TH-NOSTEN	Thailand	Tak	15.1104	101.015	16.715	98.7911	2015	AS-SE-W	S258L/F313S	RCN03191	M74I/N75E/K76T/A220S/Q271E/N326S/I356T/R371I
7107	RCN03192	1125-PF-TH-NOSTEN	Thailand	Tak	15.1104	101.015	16.715	98.7911	2015	AS-SE-W	S258L/F313S	RCN03192	M74I/N75E/K76T/A220S/Q271E/N326S/I356T/R371I
7108	RCN08053	1195-PF-TRAC2-DONDORP	Thailand	Sisakhet	15.1104	101.015	14.8559	104.371	2015	AS-SE-E	S258L/F313S	RCN08053	M74I/N75E/K76T/A220S/Q271E/N326S/I356T/R371I
7109	RCN08055	1195-PF-TRAC2-DONDORP	Thailand	Sisakhet	15.1104	101.015	14.8559	104.371	2015	AS-SE-E	S258L/F313S	RCN08055	M74I/N75E/K76T/A220S/Q271E/N326S/I356T/R371I
7110	RCN16514	1210-PF-TH-MAUDE	Thailand	Sisakhet	15.1104	101.015	14.8559	104.371	2018	AS-SE-E	S258L/F313S	RCN16514	M74I/N75E/K76T/I218F/A220S/Q271E/N326S/I356T/R371I
7111	RCN16517	1210-PF-TH-MAUDE	Thailand	Sisakhet	15.1104	101.015	14.8559	104.371	2018	AS-SE-E	S258L/F313S	RCN16517	M74I/N75E/K76T/A220S/Q271E/N326S/G353V/I356T/R371I
7118	RCN16518	1210-PF-TH-MAUDE	Thailand	Sisakhet	15.1104	101.015	14.8559	104.371	2018	AS-SE-E	S258L/F313S	RCN16518	M74I/N75E/K76T/A220S/Q271E/N326S/G353V/I356T/R371I
7119	RCN16519	1210-PF-TH-MAUDE	Thailand	Sisakhet	15.1104	101.015	14.8559	104.371	2018	AS-SE-E	S258L/F313S	RCN16519	M74I/N75E/K76T/A220S/Q271E/N326S/G353V/I356T/R371I
7122	RCN16520	1210-PF-TH-MAUDE	Thailand	Sisakhet	15.1104	101.015	14.8559	104.371	2018	AS-SE-E	S258L/F313S	RCN16520	M74I/N75E/K76T/A220S/Q271E/N326S/G353V/I356T/R371I
7140	RCN16521	1210-PF-TH-MAUDE	Thailand	Sisakhet	15.1104	101.015	14.8559	104.371	2018	AS-SE-E	S258L/F313S	RCN16521	M74I/N75E/K76T/I218F/A220S/Q271E/N326S/I356T/R371I
7145	RCN16524	1210-PF-TH-MAUDE	Thailand	Sisakhet	15.1104	101.015	14.8559	104.371	2018	AS-SE-E	S258L/F313S	RCN16524	M74I/N75E/K76T/A220S/Q271E/N326S/G353V/I356T/R371I
7149	RCN16537	1210-PF-TH-MAUDE	Thailand	Sisakhet	15.1104	101.015	14.8559	104.371	2018	AS-SE-E	S258L/F313S	RCN16537	M74I/N75E/K76T/I218F/A220S/Q271E/N326S/I356T/R371I
7151	RCN16539	1210-PF-TH-MAUDE	Thailand	Sisakhet	15.1104	101.015	14.8559	104.371	2018	AS-SE-E	S258L/F313S	RCN16539	M74I/N75E/K76T/I218F/A220S/Q271E/N326S/I356T/R371I
7158	RCN16545	1210-PF-TH-MAUDE	Thailand	Sisakhet	15.1104	101.015	14.8559	104.371	2018	AS-SE-E	S258L/F313S	RCN16545	M74I/N75E/K76T/H97Y/A220S/Q271E/N326S/I356T/R371I
7159	RCN16546	1210-PF-TH-MAUDE	Thailand	Sisakhet	15.1104	101.015	14.8559	104.371	2018	AS-SE-E	S258L/F313S	RCN16546	M74I/N75E/K76T/H97Y/A220S/Q271E/N326S/I356T/R371I
7175	RCN16547	1210-PF-TH-MAUDE	Thailand	Sisakhet	15.1104	101.015	14.8559	104.371	2018	AS-SE-E	S258L/F313S	RCN16547	M74I/N75E/K76T/A220S/Q271E/N326S/I356T/R371I
7188	RCN16548	1210-PF-TH-MAUDE	Thailand	Sisakhet	15.1104	101.015	14.8559	104.371	2018	AS-SE-E	S258L/F313S	RCN16548	M74I/N75E/K76T/A220S/Q271E/N326S/I356T/R371I
7189	RCN16558	1210-PF-TH-MAUDE	Thailand	Sisakhet	15.1104	101.015	14.8559	104.371	2018	AS-SE-E	S258L/F313S	RCN16558	M74I/N75E/K76T/A220S/Q271E/N326S/I356T/R371I
7190	RCN16559	1210-PF-TH-MAUDE	Thailand	Sisakhet	15.1104	101.015	14.8559	104.371	2018	AS-SE-E	S258L/F313S	RCN16559	M74I/N75E/K76T/A220S/Q271E/N326S/I356T/R371I
7191	RCN16565	1210-PF-TH-MAUDE	Thailand	Sisakhet	15.1104	101.015	14.8559	104.371	2018	AS-SE-E	S258L/F313S	RCN16565	M74I/N75E/K76T/A220S/Q271E/N326S/I356T/R371I
7192	RCN16587	1210-PF-TH-MAUDE	Thailand	Ubon Ratchathani	15.1104	101.015	15.1832	105.113	2018	AS-SE-E	S258L/F313S	RCN16587	M74I/N75E/K76T/A220S/Q271E/N326S/I356T/R371I
7198	SPT24876	1224-PF-VN-ROSANAS-URGELL	Vietnam	Ninh Thuan	16.6944	106.552	11.7052	108.869	2003	AS-SE-E	S258L/F313S	SPT24876	M74I/N75D/K76T/A144F/L148I/I194T/A220S/Q271E/T333S
7250	SPT24373	1224-PF-VN-ROSANAS-URGELL	Vietnam	Binh Phuoc	16.6944	106.552	11.7553	106.909	2005	AS-SE-E	S258L/F313S	SPT24373	M74I/N75D/K76T/A144F/L148I/I194T/A220S/Q271E/T333S
7261	SPT24376	1224-PF-VN-ROSANAS-URGELL	Vietnam	Binh Phuoc	16.6944	106.552	11.7553	106.909	2005	AS-SE-E	S258L/F313S	SPT24376	M74I/N75D/K76T/A144F/L148I/I194T/A220S/Q271E/T333S
7262	SPT24383	1224-PF-VN-ROSANAS-URGELL	Vietnam	Binh Phuoc	16.6944	106.552	11.7553	106.909	2005	AS-SE-E	S258L/F313S	SPT24383	M74I/N75D/K76T/A144F/L148I/I194T/A220S/Q271E/T333S
7263	SPT24386	1224-PF-VN-ROSANAS-URGELL	Vietnam	Binh Phuoc	16.6944	106.552	11.7553	106.909	2005	AS-SE-E	S258L/F313S	SPT24386	M74I/N75D/K76T/A144F/L148I/I194T/A220S/Q271E/T333S
7264	SPT24388	1224-PF-VN-ROSANAS-URGELL	Vietnam	Binh Phuoc	16.6944	106.552	11.7553	106.909	2005	AS-SE-E	S258L/F313S	SPT24388	M74I/N75D/K76T/A144F/L148I/I194T/A220S/Q271E/T333S
7267	PV0028-C	1020-PF-VN-BONI	Vietnam	Binh Phuoc	16.6944	106.552	11.7553	106.909	2010	AS-SE-E	S258L/F313S	PV0028-C	M74I/N75E/K76T/A220S/Q271E/N326S/I356T/R371I
7268	PV0035-C	1020-PF-VN-BONI	Vietnam	Binh Phuoc	16.6944	106.552	11.7553	106.909	2010	AS-SE-E	S258L/F313S	PV0035-C	M74I/N75D/K76T/A144F/L148I/I194T/A220S/Q271E/T333S
7269	PV0048-C	1020-PF-VN-BONI	Vietnam	Binh Phuoc	16.6944	106.552	11.7553	106.909	2010	AS-SE-E	S258L/F313S	PV0048-C	M74I/N75D/K76T/A144F/L148I/I194T/A220S/Q271E/T333S
7270	PV0081-C	1008-PF-SEA-RINGWALD	Vietnam	Binh Phuoc	16.6944	106.552	11.7553	106.909	2010	AS-SE-E	S258L/F313S	PV0081-C	M74I/N75E/K76T/A220S/Q271E/N326S/I356T/R371I
7273	PV0084-C	1008-PF-SEA-RINGWALD	Vietnam	Binh Phuoc	16.6944	106.552	11.7553	106.909	2010	AS-SE-E	S258L/F313S	PV0084-C	M74I/N75D/K76T/A144F/L148I/I194T/A220S/Q271E/T333S
7278	PV0088-C	1008-PF-SEA-RINGWALD	Vietnam	Binh Phuoc	16.6944	106.552	11.7553	106.909	2010	AS-SE-E	S258L/F313S	PV0088-C	M74I/N75D/K76T/A144F/L148I/I194T/A220S/Q271E/T333S
7280	PV0093-C	1008-PF-SEA-RINGWALD	Vietnam	Binh Phuoc	16.6944	106.552	11.7553	106.909	2010	AS-SE-E	S258L/F313S	PV0093-C	M74I/N75E/K76T/A220S/Q271E/N326S/I356T/R371I
7283	PV0094-C	1008-PF-SEA-RINGWALD	Vietnam	Binh Phuoc	16.6944	106.552	11.7553	106.909	2010	AS-SE-E	S258L/F313S	PV0094-C	M74I/N75D/K76T/A144F/L148I/I194T/A220S/Q271E/T333S
7288	PV0102-C	1008-PF-SEA-RINGWALD	Vietnam	Binh Phuoc	16.6944	106.552	11.7553	106.909	2010	AS-SE-E	S258L/F313S	PV0102-C	M74I/N75E/K76T/A220S/Q271E/R371I
7297	PV0110-C	1008-PF-SEA-RINGWALD	Vietnam	Binh Phuoc	16.6944	106.552	11.7553	106.909	2010	AS-SE-E	S258L/F313S	PV0110-C	M74I/N75D/K76T/A144F/L148I/I194T/A220S/Q271E/T333S
7301	PV0114-C	1008-PF-SEA-RINGWALD	Vietnam	Binh Phuoc	16.6944	106.552	11.7553	106.909	2010	AS-SE-E	S258L/F313S	PV0114-C	M74I/N75E/K76T/A220S/Q271E/N326S/I356T/R371I
7302	PV0115-C	1008-PF-SEA-RINGWALD	Vietnam	Binh Phuoc	16.6944	106.552	11.7553	106.909	2010	AS-SE-E	S258L/F313S	PV0115-C	M74I/N75D/K76T/A144F/L148I/I194T/A220S/Q271E/T333S
7431	PV0116-C	1008-PF-SEA-RINGWALD	Vietnam	Binh Phuoc	16.6944	106.552	11.7553	106.909	2010	AS-SE-E	S258L/F313S	PV0116-C	M74I/N75E/K76T/A220S/Q271E/N326S/I356T/R371I
7436	PV0117-C	1008-PF-SEA-RINGWALD	Vietnam	Binh Phuoc	16.6944	106.552	11.7553	106.909	2010	AS-SE-E	S258L/F313S	PV0117-C	M74I/N75E/K76T/A220S/Q271E/N326S/I356T/R371I
7441	PV0118-C	1008-PF-SEA-RINGWALD	Vietnam	Binh Phuoc	16.6944	106.552	11.7553	106.909	2010	AS-SE-E	S258L/F313S	PV0118-C	M74I/N75E/K76T/A220S/Q271E/N326S/I356T/R371I
7532	PV0124-C	1008-PF-SEA-RINGWALD	Vietnam	Binh Phuoc	16.6944	106.552	11.7553	106.909	2010	AS-SE-E	S258L/F313S	PV0124-C	M74I/N75E/K76T/A220S/Q271E/N326S/I356T/R371I
7544	PV0125-C	1008-PF-SEA-RINGWALD	Vietnam	Binh Phuoc	16.6944	106.552	11.7553	106.909	2010	AS-SE-E	S258L/F313S	PV0125-C	M74I/N75E/K76T/A220S/Q271E/N326S/I356T/R371I
7555	PV0130-C	1008-PF-SEA-RINGWALD	Vietnam	Binh Phuoc	16.6944	106.552	11.7553	106.909	2010	AS-SE-E	S258L/F313S	PV0130-C	M74I/N75E/K76T/A220S/Q271E/N326S/I356T/R371I
7581	PV0139-C	1008-PF-SEA-RINGWALD	Vietnam	Binh Phuoc	16.6944	106.552	11.7553	106.909	2010	AS-SE-E	S258L/F313S	PV0139-C	M74I/N75E/K76T/A220S/Q271E/R371I
7597	PV0140-C	1008-PF-SEA-RINGWALD	Vietnam	Binh Phuoc	16.6944	106.552	11.7553	106.909	2010	AS-SE-E	S258L/F313S	PV0140-C	M74I/N75E/K76T/A220S/Q271E/N326S/I356T/R371I
7598	PV0147-C	1008-PF-SEA-RINGWALD	Vietnam	Binh Phuoc	16.6944	106.552	11.7553	106.909	2010	AS-SE-E	S258L/F313S	PV0147-C	M74I/N75E/K76T/A220S/Q271E/R371I
7625	PV0151-C	1008-PF-SEA-RINGWALD	Vietnam	Binh Phuoc	16.6944	106.552	11.7553	106.909	2010	AS-SE-E	S258L/F313S	PV0151-C	M74I/N75E/K76T/A220S/Q271E/N326S/I356T/R371I
7626	PV0155-C	1008-PF-SEA-RINGWALD	Vietnam	Binh Phuoc	16.6944	106.552	11.7553	106.909	2010	AS-SE-E	S258L/F313S	PV0155-C	M74I/N75D/K76T/A144F/L148I/I194T/A220S/Q271E/T333S
7692	PV0180-C	1008-PF-SEA-RINGWALD	Vietnam	Binh Phuoc	16.6944	106.552	11.7553	106.909	2011	AS-SE-E	S258L/F313S	PV0180-C	M74I/N75E/K76T/A220S/Q271E/N326S/I356T/R371I
7693	PV0187-C	1008-PF-SEA-RINGWALD	Vietnam	Binh Phuoc	16.6944	106.552	11.7553	106.909	2011	AS-SE-E	S258L/F313S	PV0187-C	M74I/N75E/K76T/A220S/Q271E/N326S/I356T/R371I
7694	PV0194-C	1008-PF-SEA-RINGWALD	Vietnam	Binh Phuoc	16.6944	106.552	11.7553	106.909	2011	AS-SE-E	S258L/F313S	PV0194-C	M74I/N75E/K76T/A220S/Q271E/N326S/I356T/R371I
7696	PV0195-C	1008-PF-SEA-RINGWALD	Vietnam	Binh Phuoc	16.6944	106.552	11.7553	106.909	2011	AS-SE-E	S258L/F313S	PV0195-C	M74I/N75E/K76T/A220S/Q271E/N326S/I356T/R371I
7697	PV0216-C	1008-PF-SEA-RINGWALD	Vietnam	Binh Phuoc	16.6944	106.552	11.7553	106.909	2011	AS-SE-E	S258L/F313S	PV0216-C	M74I/N75E/K76T/A220S/Q271E/R371I
7705	PV0218-C	1008-PF-SEA-RINGWALD	Vietnam	Binh Phuoc	16.6944	106.552	11.7553	106.909	2011	AS-SE-E	S258L/F313S	PV0218-C	M74I/N75E/K76T/A220S/Q271E/N326S/I356T/R371I
7708	PV0220-C	1008-PF-SEA-RINGWALD	Vietnam	Binh Phuoc	16.6944	106.552	11.7553	106.909	2011	AS-SE-E	S258L/F313S	PV0220-C	M74I/N75E/K76T/A220S/Q271E/N326S/I356T/R371I
7709	PV0223-C	1008-PF-SEA-RINGWALD	Vietnam	Binh Phuoc	16.6944	106.552	11.7553	106.909	2011	AS-SE-E	S258L/F313S	PV0223-C	M74I/N75E/K76T/A220S/Q271E/N326S/I356T/R371I
7711	PV0237-C	1008-PF-SEA-RINGWALD	Vietnam	Binh Phuoc	16.6944	106.552	11.7553	106.909	2011	AS-SE-E	S258L/F313S	PV0237-C	M74I/N75D/K76T/A144F/L148I/I194T/A220S/Q271E/T333S
7712	PV0239-C	1008-PF-SEA-RINGWALD	Vietnam	Binh Phuoc	16.6944	106.552	11.7553	106.909	2011	AS-SE-E	S258L/F313S	PV0239-C	M74I/N75D/K76T/A144F/L148I/I194T/A220S/Q271E/T333S
7713	PV0240-C	1008-PF-SEA-RINGWALD	Vietnam	Binh Phuoc	16.6944	106.552	11.7553	106.909	2011	AS-SE-E	S258L/F313S	PV0240-C	M74I/N75D/K76T/A144F/L148I/I194T/A220S/Q271E/T333S
7718	PV0245-Cx2	1052-PF-TRAC-WHITE	Vietnam	Binh Phuoc	16.6944	106.552	11.7553	106.909	2011	AS-SE-E	S258L/F313S	PV0245-Cx2	M74I/N75E/K76T/A220S/Q271E/N326S/I356T/R371I
7719	PV0247-Cx2	1052-PF-TRAC-WHITE	Vietnam	Binh Phuoc	16.6944	106.552	11.7553	106.909	2011	AS-SE-E	S258L/F313S	PV0247-Cx2	M74I/N75E/K76T/A220S/Q271E/N326S/I356T/R371I
7720	PV0250-C	1052-PF-TRAC-WHITE	Vietnam	Binh Phuoc	16.6944	106.552	11.7553	106.909	2011	AS-SE-E	S258L/F313S	PV0250-C	M74I/N75E/K76T/A220S/Q271E/N326S/I356T/R371I
7721	PV0257-C	1052-PF-TRAC-WHITE	Vietnam	Binh Phuoc	16.6944	106.552	11.7553	106.909	2011	AS-SE-E	S258L/F313S	PV0257-C	M74I/N75E/K76T/A220S/Q271E/R371I
7723	PV0259-C	1052-PF-TRAC-WHITE	Vietnam	Binh Phuoc	16.6944	106.552	11.7553	106.909	2011	AS-SE-E	S258L/F313S	PV0259-C	M74I/N75E/K76T/A220S/Q271E/N326S/I356T/R371I
7724	PV0261-C	1052-PF-TRAC-WHITE	Vietnam	Binh Phuoc	16.6944	106.552	11.7553	106.909	2011	AS-SE-E	S258L/F313S	PV0261-C	M74I/N75E/K76T/A220S/Q271E/N326S/I356T/R371I
7725	PV0262-C	1052-PF-TRAC-WHITE	Vietnam	Binh Phuoc	16.6944	106.552	11.7553	106.909	2011	AS-SE-E	S258L/F313S	PV0262-C	M74I/N75E/K76T/A220S/Q271E/N326S/I356T/R371I
7726	PV0267-C	1052-PF-TRAC-WHITE	Vietnam	Binh Phuoc	16.6944	106.552	11.7553	106.909	2011	AS-SE-E	S258L/F313S	PV0267-C	M74I/N75D/K76T/A144F/L148I/I194T/A220S/Q271E/T333S
7733	PV0269-C	1052-PF-TRAC-WHITE	Vietnam	Binh Phuoc	16.6944	106.552	11.7553	106.909	2011	AS-SE-E	S258L/F313S	PV0269-C	M74I/N75D/K76T/A144F/L148I/I194T/A220S/Q271E/T333S
7737	PV0274-C	1052-PF-TRAC-WHITE	Vietnam	Binh Phuoc	16.6944	106.552	11.7553	106.909	2011	AS-SE-E	S258L/F313S	PV0274-C	M74I/N75D/K76T/A144F/L148I/I194T/A220S/Q271E/T333S
7738	PV0277-C	1052-PF-TRAC-WHITE	Vietnam	Binh Phuoc	16.6944	106.552	11.7553	106.909	2011	AS-SE-E	S258L/F313S	PV0277-C	M74I/N75E/K76T/A220S/Q271E/N326S/I356T/R371I
7748	PV0278-C	1052-PF-TRAC-WHITE	Vietnam	Binh Phuoc	16.6944	106.552	11.7553	106.909	2011	AS-SE-E	S258L/F313S	PV0278-C	M74I/N75E/K76T/A220S/Q271E/N326S/I356T/R371I
7752	PV0279-C	1052-PF-TRAC-WHITE	Vietnam	Binh Phuoc	16.6944	106.552	11.7553	106.909	2011	AS-SE-E	S258L/F313S	PV0279-C	M74I/N75D/K76T/A144F/L148I/I194T/A220S/Q271E/T333S
7753	PV0283-C	1052-PF-TRAC-WHITE	Vietnam	Binh Phuoc	16.6944	106.552	11.7553	106.909	2011	AS-SE-E	S258L/F313S	PV0283-C	M74I/N75E/K76T/A220S/Q271E/N326S/I356T/R371I
7754	PV0285-C	1052-PF-TRAC-WHITE	Vietnam	Binh Phuoc	16.6944	106.552	11.7553	106.909	2011	AS-SE-E	S258L/F313S	PV0285-C	M74I/N75E/K76T/A220S/Q271E/N326S/I356T/R371I
7779	PV0286-C	1052-PF-TRAC-WHITE	Vietnam	Binh Phuoc	16.6944	106.552	11.7553	106.909	2011	AS-SE-E	S258L/F313S	PV0286-C	M74I/N75E/K76T/A220S/Q271E/N326S/I356T/R371I
7789	PV0288-C	1052-PF-TRAC-WHITE	Vietnam	Binh Phuoc	16.6944	106.552	11.7553	106.909	2011	AS-SE-E	S258L/F313S	PV0288-C	M74I/N75E/K76T/A220S/Q271E/N326S/I356T/R371I
7791	PV0292-C	1052-PF-TRAC-WHITE	Vietnam	Binh Phuoc	16.6944	106.552	11.7553	106.909	2011	AS-SE-E	S258L/F313S	PV0292-C	M74I/N75E/K76T/A220S/Q271E/N326S/I356T/R371I
7793	PV0295-C	1052-PF-TRAC-WHITE	Vietnam	Binh Phuoc	16.6944	106.552	11.7553	106.909	2011	AS-SE-E	S258L/F313S	PV0295-C	M74I/N75D/K76T/A144F/L148I/I194T/A220S/Q271E/T333S
7864	PV0297-C	1052-PF-TRAC-WHITE	Vietnam	Binh Phuoc	16.6944	106.552	11.7553	106.909	2011	AS-SE-E	S258L/F313S	PV0297-C	M74I/N75D/K76T/A144F/L148I/I194T/A220S/Q271E/T333S
7905	PV0299-C	1052-PF-TRAC-WHITE	Vietnam	Binh Phuoc	16.6944	106.552	11.7553	106.909	2011	AS-SE-E	S258L/F313S	PV0299-C	M74I/N75E/K76T/A220S/Q271E/N326S/I356T/R371I
7908	PV0300-C	1052-PF-TRAC-WHITE	Vietnam	Binh Phuoc	16.6944	106.552	11.7553	106.909	2011	AS-SE-E	S258L/F313S	PV0300-C	M74I/N75E/K76T/A220S/Q271E/N326S/I356T/R371I
7910	PV0306-C	1052-PF-TRAC-WHITE	Vietnam	Binh Phuoc	16.6944	106.552	11.7553	106.909	2011	AS-SE-E	S258L/F313S	PV0306-C	M74I/N75E/K76T/A220S/Q271E/N326S/I356T/R371I
7918	PV0309-C	1052-PF-TRAC-WHITE	Vietnam	Binh Phuoc	16.6944	106.552	11.7553	106.909	2011	AS-SE-E	S258L/F313S	PV0309-C	M74I/N75E/K76T/A220S/Q271E/R371I
7932	PV0310-C	1052-PF-TRAC-WHITE	Vietnam	Binh Phuoc	16.6944	106.552	11.7553	106.909	2011	AS-SE-E	S258L/F313S	PV0310-C	M74I/N75D/K76T/A144F/L148I/I194T/A220S/Q271E/T333S
7934	PV0340-C	1052-PF-TRAC-WHITE	Vietnam	Binh Phuoc	16.6944	106.552	11.7553	106.909	2011	AS-SE-E	S258L/F313S	PV0340-C	M74I/N75D/K76T/A144F/L148I/I194T/A220S/Q271E/T333S
7936	PV0345-C	1052-PF-TRAC-WHITE	Vietnam	Binh Phuoc	16.6944	106.552	11.7553	106.909	2011	AS-SE-E	S258L/F313S	PV0345-C	M74I/N75E/K76T/A220S/Q271E/N326S/I356T/R371I
7939	PV0347-C	1052-PF-TRAC-WHITE	Vietnam	Binh Phuoc	16.6944	106.552	11.7553	106.909	2011	AS-SE-E	S258L/F313S	PV0347-C	M74I/N75D/K76T/A144F/L148I/I194T/A220S/Q271E/T333S
7940	PV0312-C	1052-PF-TRAC-WHITE	Vietnam	Binh Phuoc	16.6944	106.552	11.7553	106.909	2012	AS-SE-E	S258L/F313S	PV0312-C	M74I/N75E/K76T/A220S/Q271E/N326S/I356T/R371I
7941	PV0313-C	1052-PF-TRAC-WHITE	Vietnam	Binh Phuoc	16.6944	106.552	11.7553	106.909	2012	AS-SE-E	S258L/F313S	PV0313-C	M74I/N75D/K76T/A144F/L148I/I194T/A220S/Q271E/T333S
7942	PV0318-C	1052-PF-TRAC-WHITE	Vietnam	Binh Phuoc	16.6944	106.552	11.7553	106.909	2012	AS-SE-E	S258L/F313S	PV0318-C	M74I/N75E/K76T/A220S/Q271E/N326S/I356T/R371I
7944	PV0319-C	1052-PF-TRAC-WHITE	Vietnam	Binh Phuoc	16.6944	106.552	11.7553	106.909	2012	AS-SE-E	S258L/F313S	PV0319-C	M74I/N75E/K76T/A220S/Q271E/N326S/I356T/R371I
7946	PV0320-C	1052-PF-TRAC-WHITE	Vietnam	Binh Phuoc	16.6944	106.552	11.7553	106.909	2012	AS-SE-E	S258L/F313S	PV0320-C	M74I/N75E/K76T/A220S/Q271E/N326S/I356T/R371I
7947	PV0322-C	1052-PF-TRAC-WHITE	Vietnam	Binh Phuoc	16.6944	106.552	11.7553	106.909	2012	AS-SE-E	S258L/F313S	PV0322-C	M74I/N75E/K76T/A220S/Q271E/N326S/I356T/R371I
7948	PV0324-C	1052-PF-TRAC-WHITE	Vietnam	Binh Phuoc	16.6944	106.552	11.7553	106.909	2012	AS-SE-E	S258L/F313S	PV0324-C	M74I/N75E/K76T/A220S/Q271E/N326S/I356T/R371I
7957	PV0325-C	1052-PF-TRAC-WHITE	Vietnam	Binh Phuoc	16.6944	106.552	11.7553	106.909	2012	AS-SE-E	S258L/F313S	PV0325-C	M74I/N75D/K76T/A144F/L148I/I194T/A220S/Q271E/T333S
7958	PV0328-C	1052-PF-TRAC-WHITE	Vietnam	Binh Phuoc	16.6944	106.552	11.7553	106.909	2012	AS-SE-E	S258L/F313S	PV0328-C	M74I/N75D/K76T/A144F/L148I/I194T/A220S/Q271E/T333S
7960	PV0355-C	1052-PF-TRAC-WHITE	Vietnam	Binh Phuoc	16.6944	106.552	11.7553	106.909	2012	AS-SE-E	S258L/F313S	PV0355-C	M74I/N75E/K76T/A220S/Q271E/N326S/I356T/R371I
7961	SPT24393	1224-PF-VN-ROSANAS-URGELL	Vietnam	Binh Phuoc	16.6944	106.552	11.7553	106.909	2012	AS-SE-E	S258L/F313S	SPT24393	M74I/N75D/K76T/A144F/L148I/I194T/A220S/Q271E/T333S
7963	SPT24395	1224-PF-VN-ROSANAS-URGELL	Vietnam	Binh Phuoc	16.6944	106.552	11.7553	106.909	2012	AS-SE-E	S258L/F313S	SPT24395	M74I/N75D/K76T/A144F/L148I/I194T/A220S/Q271E/T333S
7964	SPT24500	1224-PF-VN-ROSANAS-URGELL	Vietnam	Ninh Thuan	16.6944	106.552	11.7052	108.869	2012	AS-SE-E	S258L/F313S	SPT24500	M74I/N75E/K76T/A220S/Q271E/N326S/I356T/R371I
7969	SPT24520	1224-PF-VN-ROSANAS-URGELL	Vietnam	Quang Nam	16.6944	106.552	15.5898	107.96	2012	AS-SE-E	S258L/F313S	SPT24520	M74I/N75E/K76T/A220S/Q271E/N326S/I356T/R371I
7970	SPT24525	1224-PF-VN-ROSANAS-URGELL	Vietnam	Quang Nam	16.6944	106.552	15.5898	107.96	2012	AS-SE-E	S258L/F313S	SPT24525	M74I/N75E/K76T/A220S/Q271E/N326S/I356T/R371I
7973	SPT24526	1224-PF-VN-ROSANAS-URGELL	Vietnam	Quang Nam	16.6944	106.552	15.5898	107.96	2012	AS-SE-E	S258L/F313S	SPT24526	M74I/N75E/K76T/A220S/Q271E/N326S/I356T/R371I
7974	SPT24530	1224-PF-VN-ROSANAS-URGELL	Vietnam	Quang Nam	16.6944	106.552	15.5898	107.96	2012	AS-SE-E	S258L/F313S	SPT24530	M74I/N75E/K76T/A220S/Q271E/N326S/I356T/R371I
7977	SPT24537	1224-PF-VN-ROSANAS-URGELL	Vietnam	Quang Nam	16.6944	106.552	15.5898	107.96	2012	AS-SE-E	S258L/F313S	SPT24537	M74I/N75E/K76T/A220S/Q271E/N326S/I356T/R371I
7978	SPT24538	1224-PF-VN-ROSANAS-URGELL	Vietnam	Quang Nam	16.6944	106.552	15.5898	107.96	2012	AS-SE-E	S258L/F313S	SPT24538	M74I/N75E/K76T/A220S/Q271E/N326S/I356T/R371I
7984	SPT24540	1224-PF-VN-ROSANAS-URGELL	Vietnam	Quang Nam	16.6944	106.552	15.5898	107.96	2012	AS-SE-E	S258L/F313S	SPT24540	M74I/N75E/K76T/A220S/Q271E/N326S/I356T/R371I
7988	SPT24542	1224-PF-VN-ROSANAS-URGELL	Vietnam	Quang Nam	16.6944	106.552	15.5898	107.96	2012	AS-SE-E	S258L/F313S	SPT24542	M74I/N75E/K76T/A220S/Q271E/N326S/I356T/R371I
7989	SPT24583	1224-PF-VN-ROSANAS-URGELL	Vietnam	Quang Nam	16.6944	106.552	15.5898	107.96	2012	AS-SE-E	S258L/F313S	SPT24583	M74I/N75E/K76T/A220S/Q271E/N326S/I356T/R371I
7992	SPT24607	1224-PF-VN-ROSANAS-URGELL	Vietnam	Quang Nam	16.6944	106.552	15.5898	107.96	2012	AS-SE-E	S258L/F313S	SPT24607	M74I/N75E/K76T/A220S/Q271E/N326S/I356T/R371I
7993	SPT24608	1224-PF-VN-ROSANAS-URGELL	Vietnam	Quang Nam	16.6944	106.552	15.5898	107.96	2012	AS-SE-E	S258L/F313S	SPT24608	M74I/N75E/K76T/A220S/Q271E/N326S/I356T/R371I
7994	SPT24610	1224-PF-VN-ROSANAS-URGELL	Vietnam	Quang Nam	16.6944	106.552	15.5898	107.96	2012	AS-SE-E	S258L/F313S	SPT24610	M74I/N75E/K76T/A220S/Q271E/N326S/I356T/R371I
7995	SPT24616	1224-PF-VN-ROSANAS-URGELL	Vietnam	Quang Nam	16.6944	106.552	15.5898	107.96	2012	AS-SE-E	S258L/F313S	SPT24616	M74I/N75E/K76T/A220S/Q271E/N326S/I356T/R371I
7996	SPT24621	1224-PF-VN-ROSANAS-URGELL	Vietnam	Quang Nam	16.6944	106.552	15.5898	107.96	2012	AS-SE-E	S258L/F313S	SPT24621	M74I/N75E/K76T/A220S/Q271E/N326S/I356T/R371I
7997	SPT24624	1224-PF-VN-ROSANAS-URGELL	Vietnam	Quang Nam	16.6944	106.552	15.5898	107.96	2012	AS-SE-E	S258L/F313S	SPT24624	M74I/N75E/K76T/A220S/Q271E/N326S/I356T/R371I
7999	SPT24627	1224-PF-VN-ROSANAS-URGELL	Vietnam	Quang Nam	16.6944	106.552	15.5898	107.96	2012	AS-SE-E	S258L/F313S	SPT24627	M74I/N75E/K76T/A220S/Q271E/N326S/I356T/R371I
8000	SPT24628	1224-PF-VN-ROSANAS-URGELL	Vietnam	Quang Nam	16.6944	106.552	15.5898	107.96	2012	AS-SE-E	S258L/F313S	SPT24628	M74I/N75E/K76T/A220S/Q271E/N326S/I356T/R371I
8002	SPT24635	1224-PF-VN-ROSANAS-URGELL	Vietnam	Quang Nam	16.6944	106.552	15.5898	107.96	2012	AS-SE-E	S258L/F313S	SPT24635	M74I/N75E/K76T/A220S/Q271E/N326S/I356T/R371I
8003	SPT24636	1224-PF-VN-ROSANAS-URGELL	Vietnam	Quang Nam	16.6944	106.552	15.5898	107.96	2012	AS-SE-E	S258L/F313S	SPT24636	M74I/N75E/K76T/A220S/Q271E/N326S/I356T/R371I
8004	SPT24643	1224-PF-VN-ROSANAS-URGELL	Vietnam	Quang Nam	16.6944	106.552	15.5898	107.96	2012	AS-SE-E	S258L/F313S	SPT24643	M74I/N75E/K76T/A220S/Q271E/N326S/I356T/R371I
8007	SPT24645	1224-PF-VN-ROSANAS-URGELL	Vietnam	Quang Nam	16.6944	106.552	15.5898	107.96	2012	AS-SE-E	S258L/F313S	SPT24645	M74I/N75E/K76T/A220S/Q271E/N326S/I356T/R371I
8008	SPT24646	1224-PF-VN-ROSANAS-URGELL	Vietnam	Quang Nam	16.6944	106.552	15.5898	107.96	2012	AS-SE-E	S258L/F313S	SPT24646	M74I/N75E/K76T/A220S/Q271E/N326S/I356T/R371I
8009	SPT24647	1224-PF-VN-ROSANAS-URGELL	Vietnam	Quang Nam	16.6944	106.552	15.5898	107.96	2012	AS-SE-E	S258L/F313S	SPT24647	M74I/N75E/K76T/A220S/Q271E/N326S/I356T/R371I
8010	SPT24648	1224-PF-VN-ROSANAS-URGELL	Vietnam	Quang Nam	16.6944	106.552	15.5898	107.96	2012	AS-SE-E	S258L/F313S	SPT24648	M74I/N75E/K76T/A220S/Q271E/N326S/I356T/R371I
8011	SPT24650	1224-PF-VN-ROSANAS-URGELL	Vietnam	Quang Nam	16.6944	106.552	15.5898	107.96	2012	AS-SE-E	S258L/F313S	SPT24650	M74I/N75E/K76T/A220S/Q271E/N326S/I356T/R371I
8012	SPT24651	1224-PF-VN-ROSANAS-URGELL	Vietnam	Quang Nam	16.6944	106.552	15.5898	107.96	2012	AS-SE-E	S258L/F313S	SPT24651	M74I/N75E/K76T/A220S/Q271E/N326S/I356T/R371I
8032	SPT24546	1224-PF-VN-ROSANAS-URGELL	Vietnam	Quang Nam	16.6944	106.552	15.5898	107.96	2013	AS-SE-E	S258L/F313S	SPT24546	M74I/N75E/K76T/A220S/Q271E/N326S/I356T/R371I
8090	SPT24547	1224-PF-VN-ROSANAS-URGELL	Vietnam	Quang Nam	16.6944	106.552	15.5898	107.96	2013	AS-SE-E	S258L/F313S	SPT24547	M74I/N75E/K76T/A220S/Q271E/N326S/I356T/R371I
8107	SPT24447	1224-PF-VN-ROSANAS-URGELL	Vietnam	Binh Phuoc	16.6944	106.552	11.7553	106.909	2014	AS-SE-E	S258L/F313S	SPT24447	M74I/N75E/K76T/A220S/Q271E/N326S/I356T/R371I
8109	SPT24448	1224-PF-VN-ROSANAS-URGELL	Vietnam	Binh Phuoc	16.6944	106.552	11.7553	106.909	2014	AS-SE-E	S258L/F313S	SPT24448	M74I/N75E/K76T/A220S/Q271E/N326S/I356T/R371I
8110	SPT24451	1224-PF-VN-ROSANAS-URGELL	Vietnam	Binh Phuoc	16.6944	106.552	11.7553	106.909	2014	AS-SE-E	S258L/F313S	SPT24451	M74I/N75E/K76T/A220S/Q271E/N326S/I356T/R371I
8111	SPT24756	1224-PF-VN-ROSANAS-URGELL	Vietnam	Khanh Hoa	16.6944	106.552	12.3281	109.038	2014	AS-SE-E	S258L/F313S	SPT24756	M74I/N75D/K76T/A144F/L148I/I194T/A220S/Q271E/T333S
8112	SPT24766	1224-PF-VN-ROSANAS-URGELL	Vietnam	Khanh Hoa	16.6944	106.552	12.3281	109.038	2014	AS-SE-E	S258L/F313S	SPT24766	M74I/N75D/K76T/A144F/L148I/I194T/A220S/Q271E/T333S
8113	SPT24782	1224-PF-VN-ROSANAS-URGELL	Vietnam	Khanh Hoa	16.6944	106.552	12.3281	109.038	2014	AS-SE-E	S258L/F313S	SPT24782	M74I/N75D/K76T/A144F/L148I/I194T/A220S/Q271E/T333S
8115	SPT24795	1224-PF-VN-ROSANAS-URGELL	Vietnam	Khanh Hoa	16.6944	106.552	12.3281	109.038	2014	AS-SE-E	S258L/F313S	SPT24795	M74I/N75E/K76T/A220S/Q271E/I356T/R371I
8122	SPT24797	1224-PF-VN-ROSANAS-URGELL	Vietnam	Khanh Hoa	16.6944	106.552	12.3281	109.038	2014	AS-SE-E	S258L/F313S	SPT24797	M74I/N75E/K76T/A220S/Q271E/I356T/R371I
8124	RCN01775	1181-PF-VN-THUYNHIEN	Vietnam	Binh Phuoc	16.6944	106.552	11.7553	106.909	2015	AS-SE-E	S258L/F313S	RCN01775	M74I/N75E/K76T/A220S/Q271E/N326S/I356T/R371I
8128	RCN01776	1181-PF-VN-THUYNHIEN	Vietnam	Binh Phuoc	16.6944	106.552	11.7553	106.909	2015	AS-SE-E	S258L/F313S	RCN01776	M74I/N75E/K76T/A220S/Q271E/N326S/I356T/R371I
8129	RCN01777	1181-PF-VN-THUYNHIEN	Vietnam	Binh Phuoc	16.6944	106.552	11.7553	106.909	2015	AS-SE-E	S258L/F313S	RCN01777	M74I/N75E/K76T/A220S/Q271E/N326S/I356T/R371I
8130	RCN01781	1181-PF-VN-THUYNHIEN	Vietnam	Binh Phuoc	16.6944	106.552	11.7553	106.909	2015	AS-SE-E	S258L/F313S	RCN01781	M74I/N75E/K76T/A220S/Q271E/N326S/I356T/R371I
8131	RCN01860	1181-PF-VN-THUYNHIEN	Vietnam	Binh Phuoc	16.6944	106.552	11.7553	106.909	2015	AS-SE-E	S258L/F313S	RCN01860	M74I/N75E/K76T/A220S/Q271E/N326S/I356T/R371I
8139	RCN01867	1181-PF-VN-THUYNHIEN	Vietnam	Binh Phuoc	16.6944	106.552	11.7553	106.909	2015	AS-SE-E	S258L/F313S	RCN01867	M74I/N75E/K76T/A220S/Q271E/N326S/I356T/R371I
8140	RCN01868	1181-PF-VN-THUYNHIEN	Vietnam	Binh Phuoc	16.6944	106.552	11.7553	106.909	2015	AS-SE-E	S258L/F313S	RCN01868	M74I/N75E/K76T/A220S/Q271E/N326S/I356T/R371I
8145	RCN01869	1181-PF-VN-THUYNHIEN	Vietnam	Binh Phuoc	16.6944	106.552	11.7553	106.909	2015	AS-SE-E	S258L/F313S	RCN01869	M74I/N75E/K76T/A220S/Q271E/N326S/I356T/R371I
8149	RCN01871	1181-PF-VN-THUYNHIEN	Vietnam	Binh Phuoc	16.6944	106.552	11.7553	106.909	2015	AS-SE-E	S258L/F313S	RCN01871	M74I/N75E/K76T/A220S/Q271E/N326S/I356T/R371I
8342	RCN01872	1181-PF-VN-THUYNHIEN	Vietnam	Binh Phuoc	16.6944	106.552	11.7553	106.909	2015	AS-SE-E	S258L/F313S	RCN01872	M74I/N75E/K76T/A220S/Q271E/N326S/I356T/R371I
8349	SPT24457	1224-PF-VN-ROSANAS-URGELL	Vietnam	Binh Phuoc	16.6944	106.552	11.7553	106.909	2015	AS-SE-E	S258L/F313S	SPT24457	M74I/N75E/K76T/A220S/Q271E/N326S/I356T/R371I
8362	SPT24458	1224-PF-VN-ROSANAS-URGELL	Vietnam	Binh Phuoc	16.6944	106.552	11.7553	106.909	2015	AS-SE-E	S258L/F313S	SPT24458	M74I/N75E/K76T/A220S/Q271E/N326S/I356T/R371I
8363	SPT24459	1224-PF-VN-ROSANAS-URGELL	Vietnam	Binh Phuoc	16.6944	106.552	11.7553	106.909	2015	AS-SE-E	S258L/F313S	SPT24459	M74I/N75D/K76T/A144F/L148I/I194T/A220S/Q271E/T333S
8366	SPT24462	1224-PF-VN-ROSANAS-URGELL	Vietnam	Binh Phuoc	16.6944	106.552	11.7553	106.909	2015	AS-SE-E	S258L/F313S	SPT24462	M74I/N75E/K76T/A220S/Q271E/N326S/I356T/R371I
8373	SPT24809	1224-PF-VN-ROSANAS-URGELL	Vietnam	Binh Phuoc	16.6944	106.552	11.7553	106.909	2015	AS-SE-E	S258L/F313S	SPT24809	M74I/N75E/K76T/A220S/Q271E/N326S/I356T/R371I
8377	SPT25121	1224-PF-VN-ROSANAS-URGELL	Vietnam	Gia Lai	16.6944	106.552	13.7977	108.241	2015	AS-SE-E	S258L/F313S	SPT25121	M74I/N75D/K76T/A144F/L148I/I194T/A220S/Q271E/T333S
8390	SPT25126	1224-PF-VN-ROSANAS-URGELL	Vietnam	Gia Lai	16.6944	106.552	13.7977	108.241	2015	AS-SE-E	S258L/F313S	SPT25126	M74I/N75D/K76T/A144F/L148I/I194T/A220S/Q271E/T333S
8408	SPT25128	1224-PF-VN-ROSANAS-URGELL	Vietnam	Gia Lai	16.6944	106.552	13.7977	108.241	2015	AS-SE-E	S258L/F313S	SPT25128	M74I/N75D/K76T/A144F/L148I/I194T/A220S/Q271E/T333S
8413	SPT25129	1224-PF-VN-ROSANAS-URGELL	Vietnam	Gia Lai	16.6944	106.552	13.7977	108.241	2015	AS-SE-E	S258L/F313S	SPT25129	M74I/N75D/K76T/A144F/L148I/I194T/A220S/Q271E/T333S
8424	SPT25136	1224-PF-VN-ROSANAS-URGELL	Vietnam	Gia Lai	16.6944	106.552	13.7977	108.241	2015	AS-SE-E	S258L/F313S	SPT25136	M74I/N75E/K76T/A220S/Q271E/N326S/I356T/R371I
8430	SPT25146	1224-PF-VN-ROSANAS-URGELL	Vietnam	Gia Lai	16.6944	106.552	13.7977	108.241	2015	AS-SE-E	S258L/F313S	SPT25146	M74I/N75E/K76T/A220S/Q271E/N326S/I356T/R371I
8453	SPT25148	1224-PF-VN-ROSANAS-URGELL	Vietnam	Gia Lai	16.6944	106.552	13.7977	108.241	2015	AS-SE-E	S258L/F313S	SPT25148	M74I/N75E/K76T/A220S/Q271E/N326S/I356T/R371I
8467	SPT25154	1224-PF-VN-ROSANAS-URGELL	Vietnam	Gia Lai	16.6944	106.552	13.7977	108.241	2015	AS-SE-E	S258L/F313S	SPT25154	M74I/N75E/K76T/A220S/Q271E/N326S/I356T/R371I
8479	RCN08115	1195-PF-TRAC2-DONDORP	Vietnam	Binh Phuoc	16.6944	106.552	11.7553	106.909	2016	AS-SE-E	S258L/F313S	RCN08115	M74I/N75D/K76T/A144F/L148I/I194T/A220S/Q271E/T333S
8480	SPT25158	1224-PF-VN-ROSANAS-URGELL	Vietnam	Gia Lai	16.6944	106.552	13.7977	108.241	2016	AS-SE-E	S258L/F313S	SPT25158	M74I/N75D/K76T/A144F/L148I/I194T/A220S/Q271E/T333S
8489	RCN08127	1195-PF-TRAC2-DONDORP	Vietnam	Binh Phuoc	16.6944	106.552	11.7553	106.909	2017	AS-SE-E	S258L/F313S	RCN08127	M74I/N75E/K76T/A220S/Q271E/N326S/M343I/I356T/R371I
8767	RCN08136	1195-PF-TRAC2-DONDORP	Vietnam	Binh Phuoc	16.6944	106.552	11.7553	106.909	2017	AS-SE-E	S258L/F313S	RCN08136	M74I/N75E/K76T/A220S/Q271E/N326S/I356T/R371I
8790	RCN08810	1209-PF-VN-IMPEQN-GENRE	Vietnam	Dak Lak	16.6944	106.552	12.8246	108.207	2017	AS-SE-E	S258L/F313S	RCN08810	M74I/N75E/K76T/I218F/A220S/Q271E/N326S/I356T/R371I
8791	RCN08824	1209-PF-VN-IMPEQN-GENRE	Vietnam	Khanh Hoa	16.6944	106.552	12.3281	109.038	2017	AS-SE-E	S258L/F313S	RCN08824	M74I/N75E/K76T/A220S/Q271E/R371I
8026	RCN08825	1209-PF-VN-IMPEQN-GENRE	Vietnam	Khanh Hoa	16.6944	106.552	12.3281	109.038	2017	AS-SE-E	S258L/F313S	RCN08825	M74I/N75E/K76T/A220S/Q271E/R371I
8092	RCN08827	1209-PF-VN-IMPEQN-GENRE	Vietnam	Khanh Hoa	16.6944	106.552	12.3281	109.038	2017	AS-SE-E	S258L/F313S	RCN08827	M74I/N75E/K76T/A220S/Q271E/R371I
8097	RCN08829	1209-PF-VN-IMPEQN-GENRE	Vietnam	Khanh Hoa	16.6944	106.552	12.3281	109.038	2017	AS-SE-E	S258L/F313S	RCN08829	M74I/N75E/K76T/A220S/Q271E/R371I
8098	RCN08885	1209-PF-VN-IMPEQN-GENRE	Vietnam	Gia Lai	16.6944	106.552	13.7977	108.241	2017	AS-SE-E	S258L/F313S	RCN08885	M74I/N75D/K76T/A144F/L148I/I194T/A220S/Q271E/T333S
8099	RCN08888	1209-PF-VN-IMPEQN-GENRE	Vietnam	Ninh Thuan	16.6944	106.552	11.7052	108.869	2017	AS-SE-E	S258L/F313S	RCN08888	M74I/N75E/K76T/A220S/Q271E/I356T/R371I
8414	RCN09229	1209-PF-VN-IMPEQN-GENRE	Vietnam	Khanh Hoa	16.6944	106.552	12.3281	109.038	2017	AS-SE-E	S258L/F313S	RCN09229	M74I/N75E/K76T/A220S/Q271E/R371I
8415	RCN09230	1209-PF-VN-IMPEQN-GENRE	Vietnam	Khanh Hoa	16.6944	106.552	12.3281	109.038	2017	AS-SE-E	S258L/F313S	RCN09230	M74I/N75E/K76T/A220S/Q271E/R371I
8553	RCN09254	1209-PF-VN-IMPEQN-GENRE	Vietnam	Dak Lak	16.6944	106.552	12.8246	108.207	2017	AS-SE-E	S258L/F313S	RCN09254	M74I/N75E/K76T/H97Y/A220S/Q271E/N326S/I356T/R371I
8581	RCN09261	1209-PF-VN-IMPEQN-GENRE	Vietnam	Dak Lak	16.6944	106.552	12.8246	108.207	2017	AS-SE-E	S258L/F313S	RCN09261	M74I/N75E/K76T/A220S/Q271E/N326S/I356T/R371I
8596	RCN09283	1209-PF-VN-IMPEQN-GENRE	Vietnam	Gia Lai	16.6944	106.552	13.7977	108.241	2017	AS-SE-E	S258L/F313S	RCN09283	M74I/N75E/K76T/A220S/Q271E/N326S/I356T/R371I
8597	RCN09285	1209-PF-VN-IMPEQN-GENRE	Vietnam	Gia Lai	16.6944	106.552	13.7977	108.241	2017	AS-SE-E	S258L/F313S	RCN09285	M74I/N75E/K76T/A220S/Q271E/N326S/I356T/R371I
8600	RCN10256	1209-PF-VN-IMPEQN-GENRE	Vietnam	Dak Lak	16.6944	106.552	12.8246	108.207	2017	AS-SE-E	S258L/F313S	RCN10256	M74I/N75E/K76T/H97Y/A220S/Q271E/N326S/I356T/R371I
8601	RCN10299	1209-PF-VN-IMPEQN-GENRE	Vietnam	Dak Lak	16.6944	106.552	12.8246	108.207	2017	AS-SE-E	S258L/F313S	RCN10299	M74I/N75E/K76T/A220S/Q271E/N326S/I356T/R371I
8710	RCN10332	1209-PF-VN-IMPEQN-GENRE	Vietnam	Dak Nong	16.6944	106.552	12.228	107.689	2017	AS-SE-E	S258L/F313S	RCN10332	M74I/N75E/K76T/H97Y/A220S/Q271E/N326S/I356T/R371I
8757	RCN10333	1209-PF-VN-IMPEQN-GENRE	Vietnam	Dak Nong	16.6944	106.552	12.228	107.689	2017	AS-SE-E	S258L/F313S	RCN10333	M74I/N75E/K76T/A220S/Q271E/N326S/I356T/R371I
8763	RCN10348	1209-PF-VN-IMPEQN-GENRE	Vietnam	Gia Lai	16.6944	106.552	13.7977	108.241	2017	AS-SE-E	S258L/F313S	RCN10348	M74I/N75E/K76T/A220S/Q271E/N326S/I356T/R371I
8770	RCN10352	1209-PF-VN-IMPEQN-GENRE	Vietnam	Gia Lai	16.6944	106.552	13.7977	108.241	2017	AS-SE-E	S258L/F313S	RCN10352	M74I/N75E/K76T/A220S/Q271E/N326S/I356T/R371I
8771	RCN10362	1209-PF-VN-IMPEQN-GENRE	Vietnam	Gia Lai	16.6944	106.552	13.7977	108.241	2017	AS-SE-E	S258L/F313S	RCN10362	M74I/N75E/K76T/A220S/Q271E/N326S/I356T/R371I
8777	RCN10385	1209-PF-VN-IMPEQN-GENRE	Vietnam	Gia Lai	16.6944	106.552	13.7977	108.241	2017	AS-SE-E	S258L/F313S	RCN10385	M74I/N75E/K76T/A220S/Q271E/R371I
8812	RCN10406	1209-PF-VN-IMPEQN-GENRE	Vietnam	Gia Lai	16.6944	106.552	13.7977	108.241	2017	AS-SE-E	S258L/F313S	RCN10406	M74I/N75E/K76T/A220S/Q271E/N326S/I356T/R371I
8842	RCN10770	1209-PF-VN-IMPEQN-GENRE	Vietnam	Quang Tri	16.6944	106.552	16.7459	106.93	2017	AS-SE-E	S258L/F313S	RCN10770	M74I/N75E/K76T/H97L/A220S/Q271E/N326S/I356T/R371I
8845	RCN10773	1209-PF-VN-IMPEQN-GENRE	Vietnam	Quang Tri	16.6944	106.552	16.7459	106.93	2017	AS-SE-E	S258L/F313S	RCN10773	M74I/N75E/K76T/H97L/A220S/Q271E/N326S/I356T/R371I
8850	RCN10774	1209-PF-VN-IMPEQN-GENRE	Vietnam	Quang Tri	16.6944	106.552	16.7459	106.93	2017	AS-SE-E	S258L/F313S	RCN10774	M74I/N75E/K76T/H97L/A220S/Q271E/N326S/I356T/R371I
8851	RCN10782	1209-PF-VN-IMPEQN-GENRE	Vietnam	Quang Tri	16.6944	106.552	16.7459	106.93	2017	AS-SE-E	S258L/F313S	RCN10782	M74I/N75E/K76T/A220S/Q271E/R371I
8872	RCN10785	1209-PF-VN-IMPEQN-GENRE	Vietnam	Quang Tri	16.6944	106.552	16.7459	106.93	2017	AS-SE-E	S258L/F313S	RCN10785	M74I/N75E/K76T/H97L/A220S/Q271E/N326S/I356T/R371I
8873	RCN10786	1209-PF-VN-IMPEQN-GENRE	Vietnam	Quang Tri	16.6944	106.552	16.7459	106.93	2017	AS-SE-E	S258L/F313S	RCN10786	M74I/N75E/K76T/H97L/A220S/Q271E/N326S/I356T/R371I
8883	RCN10794	1209-PF-VN-IMPEQN-GENRE	Vietnam	Quang Tri	16.6944	106.552	16.7459	106.93	2017	AS-SE-E	S258L/F313S	RCN10794	M74I/N75E/K76T/H97L/A220S/Q271E/N326S/I356T/R371I
8894	RCN11011	1209-PF-VN-IMPEQN-GENRE	Vietnam	Binh Phuoc	16.6944	106.552	11.7553	106.909	2017	AS-SE-E	S258L/F313S	RCN11011	M74I/N75E/K76T/H97Y/A220S/Q271E/N326S/I356T/R371I
8895	RCN11013	1209-PF-VN-IMPEQN-GENRE	Vietnam	Binh Phuoc	16.6944	106.552	11.7553	106.909	2017	AS-SE-E	S258L/F313S	RCN11013	M74I/N75E/K76T/H97Y/A220S/Q271E/N326S/I356T/R371I
8896	RCN11025	1209-PF-VN-IMPEQN-GENRE	Vietnam	Binh Phuoc	16.6944	106.552	11.7553	106.909	2017	AS-SE-E	S258L/F313S	RCN11025	M74I/N75E/K76T/H97Y/A220S/Q271E/N326S/I356T/R371I
8897	RCN11034	1209-PF-VN-IMPEQN-GENRE	Vietnam	Gia Lai	16.6944	106.552	13.7977	108.241	2017	AS-SE-E	S258L/F313S	RCN11034	M74I/N75E/K76T/H97L/A220S/Q271E/N326S/I356T/R371I
8898	RCN11038	1209-PF-VN-IMPEQN-GENRE	Vietnam	Gia Lai	16.6944	106.552	13.7977	108.241	2017	AS-SE-E	S258L/F313S	RCN11038	M74I/N75E/K76T/A220S/Q271E/N326S/I356T/R371I
8900	RCN11080	1209-PF-VN-IMPEQN-GENRE	Vietnam	Binh Phuoc	16.6944	106.552	11.7553	106.909	2017	AS-SE-E	S258L/F313S	RCN11080	M74I/N75E/K76T/A220S/Q271E/N326S/I356T/R371I
8904	RCN11168	1209-PF-VN-IMPEQN-GENRE	Vietnam	Dak Lak	16.6944	106.552	12.8246	108.207	2017	AS-SE-E	S258L/F313S	RCN11168	M74I/N75E/K76T/A220S/Q271E/N326S/I356T/R371I
8905	RCN11170	1209-PF-VN-IMPEQN-GENRE	Vietnam	Dak Lak	16.6944	106.552	12.8246	108.207	2017	AS-SE-E	S258L/F313S	RCN11170	M74I/N75E/K76T/H97Y/A220S/Q271E/N326S/I356T/R371I
8906	RCN11194	1209-PF-VN-IMPEQN-GENRE	Vietnam	Gia Lai	16.6944	106.552	13.7977	108.241	2017	AS-SE-E	S258L/F313S	RCN11194	M74I/N75E/K76T/A220S/Q271E/N326S/I356T/R371I
8907	RCN11195	1209-PF-VN-IMPEQN-GENRE	Vietnam	Khanh Hoa	16.6944	106.552	12.3281	109.038	2017	AS-SE-E	S258L/F313S	RCN11195	M74I/N75E/K76T/A220S/Q271E/R371I
8909	RCN11196	1209-PF-VN-IMPEQN-GENRE	Vietnam	Khanh Hoa	16.6944	106.552	12.3281	109.038	2017	AS-SE-E	S258L/F313S	RCN11196	M74I/N75E/K76T/A220S/Q271E/R371I
8910	RCN11221	1209-PF-VN-IMPEQN-GENRE	Vietnam	Khanh Hoa	16.6944	106.552	12.3281	109.038	2017	AS-SE-E	S258L/F313S	RCN11221	M74I/N75E/K76T/A220S/Q271E/R371I
8911	RCN11231	1209-PF-VN-IMPEQN-GENRE	Vietnam	Dak Lak	16.6944	106.552	12.8246	108.207	2017	AS-SE-E	S258L/F313S	RCN11231	M74I/N75E/K76T/H97Y/A220S/Q271E/N326S/I356T/R371I
8912	RCN11240	1209-PF-VN-IMPEQN-GENRE	Vietnam	Gia Lai	16.6944	106.552	13.7977	108.241	2017	AS-SE-E	S258L/F313S	RCN11240	M74I/N75E/K76T/A220S/Q271E/N326S/I356T/R371I
8914	RCN11241	1209-PF-VN-IMPEQN-GENRE	Vietnam	Gia Lai	16.6944	106.552	13.7977	108.241	2017	AS-SE-E	S258L/F313S	RCN11241	M74I/N75E/K76T/A220S/Q271E/N326S/I356T/R371I
8915	RCN11406	1181-PF-VN-THUYNHIEN	Vietnam	Binh Phuoc	16.6944	106.552	11.7553	106.909	2017	AS-SE-E	S258L/F313S	RCN11406	M74I/N75E/K76T/T93S/A220S/Q271E/N326S/I356T/R371I
8916	RCN11462	1181-PF-VN-THUYNHIEN	Vietnam	Binh Phuoc	16.6944	106.552	11.7553	106.909	2017	AS-SE-E	S258L/F313S	RCN11462	M74I/N75E/K76T/A220S/Q271E/N326S/I356T/R371I
8917	RCN11467	1181-PF-VN-THUYNHIEN	Vietnam	Binh Phuoc	16.6944	106.552	11.7553	106.909	2017	AS-SE-E	S258L/F313S	RCN11467	M74I/N75E/K76T/A220S/Q271E/N326S/I356T/R371I
8918	RCN12048	1209-PF-VN-IMPEQN-GENRE	Vietnam	Khanh Hoa	16.6944	106.552	12.3281	109.038	2017	AS-SE-E	S258L/F313S	RCN12048	M74I/N75E/K76T/A220S/Q271E/I356T/R371I
8919	RCN12075	1209-PF-VN-IMPEQN-GENRE	Vietnam	Gia Lai	16.6944	106.552	13.7977	108.241	2017	AS-SE-E	S258L/F313S	RCN12075	M74I/N75E/K76T/A220S/Q271E/N326S/I356T/R371I
8920	RCN11088	1209-PF-VN-IMPEQN-GENRE	Vietnam	Binh Phuoc	16.6944	106.552	11.7553	106.909	2018	AS-SE-E	S258L/F313S	RCN11088	M74I/N75E/K76T/H97Y/A220S/Q271E/N326S/I356T/R371I
8924	RCN11261	1209-PF-VN-IMPEQN-GENRE	Vietnam	Binh Phuoc	16.6944	106.552	11.7553	106.909	2018	AS-SE-E	S258L/F313S	RCN11261	M74I/N75E/K76T/T93S/A220S/Q271E/N326S/I356T/R371I
8926	RCN11282	1209-PF-VN-IMPEQN-GENRE	Vietnam	Binh Phuoc	16.6944	106.552	11.7553	106.909	2018	AS-SE-E	S258L/F313S	RCN11282	M74I/N75E/K76T/A220S/Q271E/N326S/I356T/R371I
8927	RCN11286	1209-PF-VN-IMPEQN-GENRE	Vietnam	Binh Phuoc	16.6944	106.552	11.7553	106.909	2018	AS-SE-E	S258L/F313S	RCN11286	M74I/N75E/K76T/I218F/A220S/Q271E/N326S/I356T/R371I
8929	RCN11327	1209-PF-VN-IMPEQN-GENRE	Vietnam	Binh Phuoc	16.6944	106.552	11.7553	106.909	2018	AS-SE-E	S258L/F313S	RCN11327	M74I/N75E/K76T/H97Y/A220S/Q271E/N326S/I356T/R371I
8930	RCN12072	1209-PF-VN-IMPEQN-GENRE	Vietnam	Gia Lai	16.6944	106.552	13.7977	108.241	2018	AS-SE-E	S258L/F313S	RCN12072	M74I/N75E/K76T/A220S/Q271E/N326S/I356T/R371I
8931	RCN12106	1209-PF-VN-IMPEQN-GENRE	Vietnam	Dak Nong	16.6944	106.552	12.228	107.689	2018	AS-SE-E	S258L/F313S	RCN12106	M74I/N75E/K76T/T93S/A220S/Q271E/N326S/I356T/R371I
8932	RCN12485	1238-PF-VN-NIMPE-GENRE	Vietnam	Dak Nong	16.6944	106.552	12.228	107.689	2018	AS-SE-E	S258L/F313S	RCN12485	M74I/N75E/K76T/T93S/A220S/Q271E/N326S/I356T/R371I
8933	RCN12495	1238-PF-VN-NIMPE-GENRE	Vietnam	Binh Phuoc	16.6944	106.552	11.7553	106.909	2018	AS-SE-E	S258L/F313S	RCN12495	M74I/N75E/K76T/T93S/A220S/Q271E/N326S/I356T/R371I
8936	RCN12501	1238-PF-VN-NIMPE-GENRE	Vietnam	Binh Phuoc	16.6944	106.552	11.7553	106.909	2018	AS-SE-E	S258L/F313S	RCN12501	M74I/N75E/K76T/A220S/Q271E/N326S/I356T/R371I
8938	RCN12562	1238-PF-VN-NIMPE-GENRE	Vietnam	Binh Phuoc	16.6944	106.552	11.7553	106.909	2018	AS-SE-E	S258L/F313S	RCN12562	M74I/N75E/K76T/H97Y/A220S/Q271E/N326S/I356T/R371I
8939	RCN12574	1238-PF-VN-NIMPE-GENRE	Vietnam	Binh Phuoc	16.6944	106.552	11.7553	106.909	2018	AS-SE-E	S258L/F313S	RCN12574	M74I/N75E/K76T/A220S/Q271E/N326S/I356T/R371I
8940	RCN12584	1238-PF-VN-NIMPE-GENRE	Vietnam	Binh Phuoc	16.6944	106.552	11.7553	106.909	2018	AS-SE-E	S258L/F313S	RCN12584	M74I/N75E/K76T/H97Y/A220S/Q271E/N326S/I356T/R371I
8941	RCN12710	1209-PF-VN-IMPEQN-GENRE	Vietnam	Dak Lak	16.6944	106.552	12.8246	108.207	2018	AS-SE-E	S258L/F313S	RCN12710	M74I/N75E/K76T/H97Y/A220S/Q271E/N326S/I356T/R371I
8903	RCN12713	1209-PF-VN-IMPEQN-GENRE	Vietnam	Dak Lak	16.6944	106.552	12.8246	108.207	2018	AS-SE-E	S258L/F313S	RCN12713	M74I/N75E/K76T/A220S/Q271E/N326S/I356T/R371I
8913	RCN12729	1209-PF-VN-IMPEQN-GENRE	Vietnam	Gia Lai	16.6944	106.552	13.7977	108.241	2018	AS-SE-E	S258L/F313S	RCN12729	M74I/N75E/K76T/A220S/Q271E/N326S/I356T/R371I
8928	RCN12779	1238-PF-VN-NIMPE-GENRE	Vietnam	Binh Phuoc	16.6944	106.552	11.7553	106.909	2018	AS-SE-E	S258L/F313S	RCN12779	M74I/N75E/K76T/A220S/Q271E/N326S/I356T/R371I
8934	RCN12787	1238-PF-VN-NIMPE-GENRE	Vietnam	Binh Phuoc	16.6944	106.552	11.7553	106.909	2018	AS-SE-E	S258L/F313S	RCN12787	M74I/N75E/K76T/H97Y/A220S/Q271E/N326S/I356T/R371I
8935	RCN12854	1238-PF-VN-NIMPE-GENRE	Vietnam	Binh Phuoc	16.6944	106.552	11.7553	106.909	2018	AS-SE-E	S258L/F313S	RCN12854	M74I/N75E/K76T/F145I/A220S/Q271E/N326S/I356T/R371I
8937	RCN12865	1238-PF-VN-NIMPE-GENRE	Vietnam	Binh Phuoc	16.6944	106.552	11.7553	106.909	2018	AS-SE-E	S258L/F313S	RCN12865	M74I/N75E/K76T/I218F/A220S/Q271E/N326S/I356T/R371I
8942	RCN12868	1238-PF-VN-NIMPE-GENRE	Vietnam	Binh Phuoc	16.6944	106.552	11.7553	106.909	2018	AS-SE-E	S258L/F313S	RCN12868	M74I/N75E/K76T/A220S/Q271E/N326S/I356T/R371I
3094	RCN12888	1238-PF-VN-NIMPE-GENRE	Vietnam	Gia Lai	16.6944	106.552	13.7977	108.241	2018	AS-SE-E	S258L/F313S	RCN12888	M74I/N75E/K76T/H97Y/A220S/Q271E/N326S/I356T/R371I
3099	RCN14210	1209-PF-VN-IMPEQN-GENRE	Vietnam	Dak Lak	16.6944	106.552	12.8246	108.207	2018	AS-SE-E	S258L/F313S	RCN14210	M74I/N75E/K76T/A220S/Q271E/N326S/I356T/R371I
1940	RCN14233	1209-PF-VN-IMPEQN-GENRE	Vietnam	Khanh Hoa	16.6944	106.552	12.3281	109.038	2018	AS-SE-E	S258L/F313S	RCN14233	M74I/N75E/K76T/A220S/Q271E/N326S/I356T/R371I
3110	RCN14243	1209-PF-VN-IMPEQN-GENRE	Vietnam	Gia Lai	16.6944	106.552	13.7977	108.241	2018	AS-SE-E	S258L/F313S	RCN14243	M74I/N75E/K76T/A220S/Q271E/N326S/I356T/R371I
3117	RCN14617	1209-PF-VN-IMPEQN-GENRE	Vietnam	Gia Lai	16.6944	106.552	13.7977	108.241	2018	AS-SE-E	S258L/F313S	RCN14617	M74I/N75E/K76T/A220S/Q271E/N326S/I356T/R371I
3141	RCN14630	1209-PF-VN-IMPEQN-GENRE	Vietnam	Gia Lai	16.6944	106.552	13.7977	108.241	2018	AS-SE-E	S258L/F313S	RCN14630	M74I/N75E/K76T/A220S/Q271E/N326S/I356T/R371I
10288	RCN14642	1209-PF-VN-IMPEQN-GENRE	Vietnam	Gia Lai	16.6944	106.552	13.7977	108.241	2018	AS-SE-E	S258L/F313S	RCN14642	M74I/N75E/K76T/H97L/A220S/Q271E/N326S/I356T/R371I
2075	RCN14673	1209-PF-VN-IMPEQN-GENRE	Vietnam	Gia Lai	16.6944	106.552	13.7977	108.241	2018	AS-SE-E	S258L/F313S	RCN14673	M74I/N75E/K76T/A220S/Q271E/N326S/I356T/R371I
2079	RCN14697	1209-PF-VN-IMPEQN-GENRE	Vietnam	Gia Lai	16.6944	106.552	13.7977	108.241	2018	AS-SE-E	S258L/F313S	RCN14697	M74I/N75E/K76T/A220S/Q271E/N326S/I356T/R371I
2139	RCN14698	1209-PF-VN-IMPEQN-GENRE	Vietnam	Gia Lai	16.6944	106.552	13.7977	108.241	2018	AS-SE-E	S258L/F313S	RCN14698	M74I/N75E/K76T/A220S/Q271E/N326S/I356T/R371I
3146	RCN14739	1209-PF-VN-IMPEQN-GENRE	Vietnam	Binh Phuoc	16.6944	106.552	11.7553	106.909	2018	AS-SE-E	S258L/F313S	RCN14739	M74I/N75E/K76T/A220S/Q271E/N326S/I356T/R371I
3150	RCN14740	1209-PF-VN-IMPEQN-GENRE	Vietnam	Binh Phuoc	16.6944	106.552	11.7553	106.909	2018	AS-SE-E	S258L/F313S	RCN14740	M74I/N75E/K76T/A220S/Q271E/N326S/I356T/R371I
3177	RCN15897	1209-PF-VN-IMPEQN-GENRE	Vietnam	Gia Lai	16.6944	106.552	13.7977	108.241	2018	AS-SE-E	S258L/F313S	RCN15897	M74I/N75E/K76T/A220S/Q271E/R371I
2274	RCN16019	1209-PF-VN-IMPEQN-GENRE	Vietnam	Gia Lai	16.6944	106.552	13.7977	108.241	2018	AS-SE-E	S258L/F313S	RCN16019	M74I/N75E/K76T/I218F/A220S/Q271E/N326S/I356T/R371I
10273	RCN15887	1209-PF-VN-IMPEQN-GENRE	Vietnam	Binh Phuoc	16.6944	106.552	11.7553	106.909	2019	AS-SE-E	S258L/F313S	RCN15887	M74I/N75E/K76T/I218F/A220S/Q271E/N326S/I356T/R371I
1151	RCN16023	1209-PF-VN-IMPEQN-GENRE	Vietnam	Gia Lai	16.6944	106.552	13.7977	108.241	2019	AS-SE-E	S258L/F313S	RCN16023	M74I/N75E/K76T/A220S/Q271E/N326S/I356T/R371I
1255	RCN16038	1209-PF-VN-IMPEQN-GENRE	Vietnam	Gia Lai	16.6944	106.552	13.7977	108.241	2019	AS-SE-E	S258L/F313S	RCN16038	M74I/N75E/K76T/A220S/Q271E/N326S/I356T/R371I
5514	RCN16042	1209-PF-VN-IMPEQN-GENRE	Vietnam	Gia Lai	16.6944	106.552	13.7977	108.241	2019	AS-SE-E	S258L/F313S	RCN16042	M74I/N75E/K76T/A220S/Q271E/N326S/I356T/R371I
5515	RCN16043	1209-PF-VN-IMPEQN-GENRE	Vietnam	Gia Lai	16.6944	106.552	13.7977	108.241	2019	AS-SE-E	S258L/F313S	RCN16043	M74I/N75E/K76T/A220S/Q271E/N326S/I356T/R371I
6190	RCN24855	1209-PF-VN-IMPEQN-GENRE	Vietnam	Gia Lai	16.6944	106.552	13.7977	108.241	2019	AS-SE-E	S258L/F313S	RCN24855	M74I/N75E/K76T/A220S/Q271E/N326S/I356T/R371I
6247	RCN24888	1209-PF-VN-IMPEQN-GENRE	Vietnam	Gia Lai	16.6944	106.552	13.7977	108.241	2019	AS-SE-E	S258L/F313S	RCN24888	M74I/N75E/K76T/A220S/Q271E/N326S/I356T/R371I
6251	RCN24909	1209-PF-VN-IMPEQN-GENRE	Vietnam	Gia Lai	16.6944	106.552	13.7977	108.241	2019	AS-SE-E	S258L/F313S	RCN24909	M74I/N75E/K76T/A220S/Q271E/N326S/I356T/R371I
6556	RCN24910	1209-PF-VN-IMPEQN-GENRE	Vietnam	Gia Lai	16.6944	106.552	13.7977	108.241	2019	AS-SE-E	S258L/F313S	RCN24910	M74I/N75E/K76T/A220S/Q271E/N326S/I356T/R371I
6568	RCN24913	1209-PF-VN-IMPEQN-GENRE	Vietnam	Gia Lai	16.6944	106.552	13.7977	108.241	2019	AS-SE-E	S258L/F313S	RCN24913	M74I/N75E/K76T/A220S/Q271E/N326S/I356T/R371I
6585	RCN24914	1209-PF-VN-IMPEQN-GENRE	Vietnam	Gia Lai	16.6944	106.552	13.7977	108.241	2019	AS-SE-E	S258L/F313S	RCN24914	M74I/N75E/K76T/A220S/Q271E/N326S/I356T/R371I
10566	RCN25079	1209-PF-VN-IMPEQN-GENRE	Vietnam	Gia Lai	16.6944	106.552	13.7977	108.241	2019	AS-SE-E	S258L/F313S	RCN25079	M74I/N75E/K76T/A220S/Q271E/N326S/I356T/R371I
6528	PV0002-C	1020-PF-VN-BONI	Vietnam	Binh Phuoc	16.6944	106.552	11.7553	106.909	2009	AS-SE-E	S258L/F313S	PV0002-C
7117	PV0031-C	1020-PF-VN-BONI	Vietnam	Binh Phuoc	16.6944	106.552	11.7553	106.909	2009	AS-SE-E	S258L/F313S	PV0031-C	H273N
7730	PV0085-C	1008-PF-SEA-RINGWALD	Vietnam	Binh Phuoc	16.6944	106.552	11.7553	106.909	2010	AS-SE-E	S258L/F313S	PV0085-C	H273N
7740	PV0101-C	1008-PF-SEA-RINGWALD	Vietnam	Binh Phuoc	16.6944	106.552	11.7553	106.909	2010	AS-SE-E	S258L/F313S	PV0101-C	H273N
7746	PV0158-C	1008-PF-SEA-RINGWALD	Vietnam	Binh Phuoc	16.6944	106.552	11.7553	106.909	2010	AS-SE-E	S258L/F313S	PV0158-C	H273N
8499	SPT24558	1224-PF-VN-ROSANAS-URGELL	Vietnam	Quang Tri	16.6944	106.552	16.7459	106.93	2010	AS-SE-E	S258L/F313S	SPT24558
8539	PV0185-C	1008-PF-SEA-RINGWALD	Vietnam	Binh Phuoc	16.6944	106.552	11.7553	106.909	2011	AS-SE-E	S258L/F313S	PV0185-C	H273N
8816	PV0193-C	1008-PF-SEA-RINGWALD	Vietnam	Binh Phuoc	16.6944	106.552	11.7553	106.909	2011	AS-SE-E	S258L/F313S	PV0193-C	H273N
8856	PV0258-C	1052-PF-TRAC-WHITE	Vietnam	Binh Phuoc	16.6944	106.552	11.7553	106.909	2011	AS-SE-E	S258L/F313S	PV0258-C
8857	SPT24501	1224-PF-VN-ROSANAS-URGELL	Vietnam	Ninh Thuan	16.6944	106.552	11.7052	108.869	2012	AS-SE-E	S258L/F313S	SPT24501
8862	RCN08890	1209-PF-VN-IMPEQN-GENRE	Vietnam	Ninh Thuan	16.6944	106.552	11.7052	108.869	2017	AS-SE-E	S258L/F313S	RCN08890	H273N
8865	RCN08891	1209-PF-VN-IMPEQN-GENRE	Vietnam	Ninh Thuan	16.6944	106.552	11.7052	108.869	2017	AS-SE-E	S258L/F313S	RCN08891	H273N
8866	RCN10380	1209-PF-VN-IMPEQN-GENRE	Vietnam	Gia Lai	16.6944	106.552	13.7977	108.241	2017	AS-SE-E	S258L/F313S	RCN10380
8868	RCN10766	1209-PF-VN-IMPEQN-GENRE	Vietnam	Quang Tri	16.6944	106.552	16.7459	106.93	2017	AS-SE-E	S258L/F313S	RCN10766
8877	RCN10772	1209-PF-VN-IMPEQN-GENRE	Vietnam	Quang Tri	16.6944	106.552	16.7459	106.93	2017	AS-SE-E	S258L/F313S	RCN10772
8878	RCN24791	1209-PF-VN-IMPEQN-GENRE	Vietnam	Dak Lak	16.6944	106.552	12.8246	108.207	2019	AS-SE-E	S258L/F313S	RCN24791
8880	RCN24833	1209-PF-VN-IMPEQN-GENRE	Vietnam	Dak Lak	16.6944	106.552	12.8246	108.207	2019	AS-SE-E	S258L/F313S	RCN24833
11431	SPT38325	1247-PF-SD-HAMID-SM	Sudan	Khartoum	16.0494	30.0056	15.8437	32.8018	2017	AF-NE	S258L/F278L	SPT38325	M74I/N75E/K76T/A220S/Q271E/R371I
9060	SPT12520	1168-PF-GH-AMENGA-ETEGO-SM	Ghana	Upper East	7.96678	-1.21071	10.7777	-0.820531	2016	AF-W	S258L/A466V	SPT12520
9738	SPT18247	1168-PF-GH-AMENGA-ETEGO-SM	Ghana	Upper East	7.96678	-1.21071	10.7777	-0.820531	2014	AF-W	S258L/A466S	SPT18247
10897	PR0002-CW	1031-PF-SEA-PLOWE	Bangladesh	Chittagong	23.8368	90.2774	22.7121	91.7303	2008	AS-S-FE	S258L	PR0002-CW	M74I/N75E/K76T/A220S/Q271E/N326S/I356T/R371I
12867	PR0015-C	1031-PF-SEA-PLOWE	Bangladesh	Chittagong	23.8368	90.2774	22.7121	91.7303	2008	AS-S-FE	S258L	PR0015-C	M74I/N75E/K76T/A220S/Q271E/I356T/R371I
12868	PR0005-CW	1031-PF-SEA-PLOWE	Bangladesh	Chittagong	23.8368	90.2774	22.7121	91.7303	2009	AS-S-FE	S258L	PR0005-CW	M74I/N75E/K76T/A220S/Q271E/I356T/R371I
12869	PR0039-C	1031-PF-SEA-PLOWE	Bangladesh	Chittagong	23.8368	90.2774	22.7121	91.7303	2009	AS-S-FE	S258L	PR0039-C	M74I/N75E/K76T/A220S/Q271E/R371I
12870	PR0044-C	1031-PF-SEA-PLOWE	Bangladesh	Chittagong	23.8368	90.2774	22.7121	91.7303	2009	AS-S-FE	S258L	PR0044-C	M74I/N75E/K76T/A220S/Q271E/I356T/R371I
12873	PR0114-C	1052-PF-TRAC-WHITE	Bangladesh	Chittagong	23.8368	90.2774	22.7121	91.7303	2012	AS-S-FE	S258L	PR0114-C	M74I/N75E/K76T/A220S/Q271E/N326S/I356T/R371I
12874	PR0117-C	1052-PF-TRAC-WHITE	Bangladesh	Chittagong	23.8368	90.2774	22.7121	91.7303	2012	AS-S-FE	S258L	PR0117-C	M74I/N75E/K76T/A220S/Q271E/N326S/I356T/R371I
12875	PR0120-C	1052-PF-TRAC-WHITE	Bangladesh	Chittagong	23.8368	90.2774	22.7121	91.7303	2012	AS-S-FE	S258L	PR0120-C	M74I/N75E/K76T/A220S/Q271E/I356T/R371I
12876	PR0130-C	1052-PF-TRAC-WHITE	Bangladesh	Chittagong	23.8368	90.2774	22.7121	91.7303	2012	AS-S-FE	S258L	PR0130-C	M74I/N75E/K76T/A220S/Q271E/I356T/R371I
12877	PR0131-C	1052-PF-TRAC-WHITE	Bangladesh	Chittagong	23.8368	90.2774	22.7121	91.7303	2012	AS-S-FE	S258L	PR0131-C	M74I/N75E/K76T/A220S/Q271E/I356T/R371I
12968	PR0142-C	1052-PF-TRAC-WHITE	Bangladesh	Chittagong	23.8368	90.2774	22.7121	91.7303	2012	AS-S-FE	S258L	PR0142-C	M74I/N75E/K76T/A220S/Q271E/I356T/R371I
13124	PR0145-C	1052-PF-TRAC-WHITE	Bangladesh	Chittagong	23.8368	90.2774	22.7121	91.7303	2012	AS-S-FE	S258L	PR0145-C	M74I/N75E/K76T/A220S/Q271E/I356T/R371I
13125	PR0156-C	1052-PF-TRAC-WHITE	Bangladesh	Chittagong	23.8368	90.2774	22.7121	91.7303	2012	AS-S-FE	S258L	PR0156-C	M74I/N75E/K76T/A220S/Q271E/I356T/R371I
13126	PR0159-C	1052-PF-TRAC-WHITE	Bangladesh	Chittagong	23.8368	90.2774	22.7121	91.7303	2012	AS-S-FE	S258L	PR0159-C	M74I/N75E/K76T/A220S/Q271E/I356T/R371I
13127	PR0160-C	1052-PF-TRAC-WHITE	Bangladesh	Chittagong	23.8368	90.2774	22.7121	91.7303	2012	AS-S-FE	S258L	PR0160-C	M74I/N75E/K76T/A220S/Q271E/I356T/R371I
13128	PR0263-C	1195-PF-TRAC2-DONDORP	Bangladesh	Chittagong	23.8368	90.2774	22.7121	91.7303	2015	AS-S-FE	S258L	PR0263-C	M74I/N75E/K76T/A220S/Q271E/I356T/R371I
13129	RCN00123	1148-PF-BD-MAUDE	Bangladesh	Chittagong	23.8368	90.2774	22.7121	91.7303	2015	AS-S-FE	S258L	RCN00123	M74I/N75E/K76T/A220S/Q271E/I356T/R371I
13130	RCN00126	1148-PF-BD-MAUDE	Bangladesh	Chittagong	23.8368	90.2774	22.7121	91.7303	2015	AS-S-FE	S258L	RCN00126	M74I/N75E/K76T/A220S/Q271E/I356T/R371I
13131	RCN00127	1148-PF-BD-MAUDE	Bangladesh	Chittagong	23.8368	90.2774	22.7121	91.7303	2015	AS-S-FE	S258L	RCN00127	M74I/N75E/K76T/A220S/Q271E/N326S/I356T/R371I
13132	RCN00143	1148-PF-BD-MAUDE	Bangladesh	Chittagong	23.8368	90.2774	22.7121	91.7303	2015	AS-S-FE	S258L	RCN00143	M74I/N75E/K76T/A220S/Q271E/I356T/R371I
13134	RCN00159	1148-PF-BD-MAUDE	Bangladesh	Chittagong	23.8368	90.2774	22.7121	91.7303	2015	AS-S-FE	S258L	RCN00159	M74I/N75E/K76T/A220S/Q271E/I356T/R371I
13135	RCN00165	1148-PF-BD-MAUDE	Bangladesh	Chittagong	23.8368	90.2774	22.7121	91.7303	2015	AS-S-FE	S258L	RCN00165	M74I/N75E/K76T/A220S/Q271E/I356T/R371I
13136	RCN00177	1148-PF-BD-MAUDE	Bangladesh	Chittagong	23.8368	90.2774	22.7121	91.7303	2015	AS-S-FE	S258L	RCN00177	M74I/N75E/K76T/A220S/Q271E/I356T/R371I
13137	RCN00178	1148-PF-BD-MAUDE	Bangladesh	Chittagong	23.8368	90.2774	22.7121	91.7303	2015	AS-S-FE	S258L	RCN00178	M74I/N75E/K76T/A220S/Q271E/I356T/R371I
13138	RCN00180	1148-PF-BD-MAUDE	Bangladesh	Chittagong	23.8368	90.2774	22.7121	91.7303	2015	AS-S-FE	S258L	RCN00180	M74I/N75E/K76T/A220S/Q271E/I356T/R371I
13139	RCN00193	1148-PF-BD-MAUDE	Bangladesh	Chittagong	23.8368	90.2774	22.7121	91.7303	2015	AS-S-FE	S258L	RCN00193	M74I/N75E/K76T/A220S/Q271E/I356T/R371I
13141	RCN00219	1148-PF-BD-MAUDE	Bangladesh	Chittagong	23.8368	90.2774	22.7121	91.7303	2015	AS-S-FE	S258L	RCN00219	M74I/N75E/K76T/A220S/Q271E/R371I
13287	RCN00223	1148-PF-BD-MAUDE	Bangladesh	Chittagong	23.8368	90.2774	22.7121	91.7303	2015	AS-S-FE	S258L	RCN00223	M74I/N75E/K76T/A220S/Q271E/N326S/I356T/R371I
13300	RCN00225	1148-PF-BD-MAUDE	Bangladesh	Chittagong	23.8368	90.2774	22.7121	91.7303	2015	AS-S-FE	S258L	RCN00225	M74I/N75E/K76T/A220S/Q271E/R371I
11847	RCN00227	1148-PF-BD-MAUDE	Bangladesh	Chittagong	23.8368	90.2774	22.7121	91.7303	2015	AS-S-FE	S258L	RCN00227	M74I/N75E/K76T/A220S/Q271E/N326S/I356T/R371I
11848	RCN00228	1148-PF-BD-MAUDE	Bangladesh	Chittagong	23.8368	90.2774	22.7121	91.7303	2015	AS-S-FE	S258L	RCN00228	M74I/N75E/K76T/A220S/Q271E/R371I
11849	RCN00232	1148-PF-BD-MAUDE	Bangladesh	Chittagong	23.8368	90.2774	22.7121	91.7303	2015	AS-S-FE	S258L	RCN00232	M74I/N75E/K76T/A220S/Q271E/R371I
11850	RCN00233	1148-PF-BD-MAUDE	Bangladesh	Chittagong	23.8368	90.2774	22.7121	91.7303	2015	AS-S-FE	S258L	RCN00233	M74I/N75E/K76T/A220S/Q271E/I356T/R371I
11851	RCN00236	1148-PF-BD-MAUDE	Bangladesh	Chittagong	23.8368	90.2774	22.7121	91.7303	2015	AS-S-FE	S258L	RCN00236	M74I/N75E/K76T/A220S/Q271E/I356T/R371I
11852	RCN00238	1148-PF-BD-MAUDE	Bangladesh	Chittagong	23.8368	90.2774	22.7121	91.7303	2015	AS-S-FE	S258L	RCN00238	M74I/N75E/K76T/A220S/Q271E/I356T/R371I
11853	RCN00240	1148-PF-BD-MAUDE	Bangladesh	Chittagong	23.8368	90.2774	22.7121	91.7303	2015	AS-S-FE	S258L	RCN00240	M74I/N75E/K76T/A220S/Q271E/I356T/R371I
11854	RCN00241	1148-PF-BD-MAUDE	Bangladesh	Chittagong	23.8368	90.2774	22.7121	91.7303	2015	AS-S-FE	S258L	RCN00241	M74I/N75E/K76T/A220S/Q271E/I356T/R371I
11856	RCN00242	1148-PF-BD-MAUDE	Bangladesh	Chittagong	23.8368	90.2774	22.7121	91.7303	2015	AS-S-FE	S258L	RCN00242	M74I/N75E/K76T/A220S/Q271E/I356T/R371I
11858	RCN00243	1148-PF-BD-MAUDE	Bangladesh	Chittagong	23.8368	90.2774	22.7121	91.7303	2015	AS-S-FE	S258L	RCN00243	M74I/N75E/K76T/A220S/Q271E/R371I
11859	RCN00246	1148-PF-BD-MAUDE	Bangladesh	Chittagong	23.8368	90.2774	22.7121	91.7303	2015	AS-S-FE	S258L	RCN00246	M74I/N75E/K76T/A220S/Q271E/I356T/R371I
11860	RCN00250	1148-PF-BD-MAUDE	Bangladesh	Chittagong	23.8368	90.2774	22.7121	91.7303	2015	AS-S-FE	S258L	RCN00250	M74I/N75E/K76T/A220S/Q271E/I356T/R371I
11861	RCN00252	1148-PF-BD-MAUDE	Bangladesh	Chittagong	23.8368	90.2774	22.7121	91.7303	2015	AS-S-FE	S258L	RCN00252	M74I/N75E/K76T/A220S/Q271E/I356T/R371I
11862	RCN00254	1148-PF-BD-MAUDE	Bangladesh	Chittagong	23.8368	90.2774	22.7121	91.7303	2015	AS-S-FE	S258L	RCN00254	M74I/N75E/K76T/A220S/Q271E/I356T/R371I
11863	RCN00260	1148-PF-BD-MAUDE	Bangladesh	Chittagong	23.8368	90.2774	22.7121	91.7303	2015	AS-S-FE	S258L	RCN00260	M74I/N75E/K76T/A220S/Q271E/I356T/R371I
11864	RCN00261	1148-PF-BD-MAUDE	Bangladesh	Chittagong	23.8368	90.2774	22.7121	91.7303	2015	AS-S-FE	S258L	RCN00261	M74I/N75E/K76T/A220S/Q271E/I356T/R371I
11865	RCN00262	1148-PF-BD-MAUDE	Bangladesh	Chittagong	23.8368	90.2774	22.7121	91.7303	2015	AS-S-FE	S258L	RCN00262	M74I/N75E/K76T/A220S/Q271E/I356T/R371I
11866	RCN00263	1148-PF-BD-MAUDE	Bangladesh	Chittagong	23.8368	90.2774	22.7121	91.7303	2015	AS-S-FE	S258L	RCN00263	M74I/N75E/K76T/A220S/Q271E/I356T/R371I
11867	RCN00265	1148-PF-BD-MAUDE	Bangladesh	Chittagong	23.8368	90.2774	22.7121	91.7303	2015	AS-S-FE	S258L	RCN00265	M74I/N75E/K76T/A220S/Q271E/I356T/R371I
11868	RCN00266	1148-PF-BD-MAUDE	Bangladesh	Chittagong	23.8368	90.2774	22.7121	91.7303	2015	AS-S-FE	S258L	RCN00266	M74I/N75E/K76T/A220S/Q271E/I356T/R371I
11869	RCN00271	1148-PF-BD-MAUDE	Bangladesh	Chittagong	23.8368	90.2774	22.7121	91.7303	2015	AS-S-FE	S258L	RCN00271	M74I/N75E/K76T/A220S/Q271E/R371I
11870	RCN00272	1148-PF-BD-MAUDE	Bangladesh	Chittagong	23.8368	90.2774	22.7121	91.7303	2015	AS-S-FE	S258L	RCN00272	M74I/N75E/K76T/A220S/Q271E/N326S/I356T/R371I
12969	RCN00275	1148-PF-BD-MAUDE	Bangladesh	Chittagong	23.8368	90.2774	22.7121	91.7303	2015	AS-S-FE	S258L	RCN00275	M74I/N75E/K76T/A220S/Q271E/I356T/R371I
12970	RCN00278	1148-PF-BD-MAUDE	Bangladesh	Chittagong	23.8368	90.2774	22.7121	91.7303	2015	AS-S-FE	S258L	RCN00278	M74I/N75E/K76T/A220S/Q271E/I356T/R371I
13142	RCN00281	1148-PF-BD-MAUDE	Bangladesh	Chittagong	23.8368	90.2774	22.7121	91.7303	2015	AS-S-FE	S258L	RCN00281	M74I/N75E/K76T/A220S/Q271E/I356T/R371I
13143	RCN00282	1148-PF-BD-MAUDE	Bangladesh	Chittagong	23.8368	90.2774	22.7121	91.7303	2015	AS-S-FE	S258L	RCN00282	M74I/N75E/K76T/A220S/Q271E/I356T/R371I
13144	RCN00288	1148-PF-BD-MAUDE	Bangladesh	Chittagong	23.8368	90.2774	22.7121	91.7303	2015	AS-S-FE	S258L	RCN00288	M74I/N75E/K76T/A220S/Q271E/R371I
13146	RCN00289	1148-PF-BD-MAUDE	Bangladesh	Chittagong	23.8368	90.2774	22.7121	91.7303	2015	AS-S-FE	S258L	RCN00289	M74I/N75E/K76T/A220S/Q271E/I356T/R371I
11871	RCN00291	1148-PF-BD-MAUDE	Bangladesh	Chittagong	23.8368	90.2774	22.7121	91.7303	2015	AS-S-FE	S258L	RCN00291	M74I/N75E/K76T/A220S/Q271E/I356T/R371I
11872	RCN00292	1148-PF-BD-MAUDE	Bangladesh	Chittagong	23.8368	90.2774	22.7121	91.7303	2015	AS-S-FE	S258L	RCN00292	M74I/N75E/K76T/A220S/Q271E/I356T/R371I
11873	RCN00293	1148-PF-BD-MAUDE	Bangladesh	Chittagong	23.8368	90.2774	22.7121	91.7303	2015	AS-S-FE	S258L	RCN00293	M74I/N75E/K76T/A220S/Q271E/I356T/R371I
11874	RCN00294	1148-PF-BD-MAUDE	Bangladesh	Chittagong	23.8368	90.2774	22.7121	91.7303	2015	AS-S-FE	S258L	RCN00294	M74I/N75E/K76T/A220S/Q271E/N326S/I356T/R371I
11875	RCN00712	1148-PF-BD-MAUDE	Bangladesh	Chittagong	23.8368	90.2774	22.7121	91.7303	2015	AS-S-FE	S258L	RCN00712	M74I/N75E/K76T/A220S/Q271E/I356T/R371I
11877	RCN00715	1148-PF-BD-MAUDE	Bangladesh	Chittagong	23.8368	90.2774	22.7121	91.7303	2015	AS-S-FE	S258L	RCN00715	M74I/N75E/K76T/A220S/Q271E/I356T/R371I
11878	RCN00729	1148-PF-BD-MAUDE	Bangladesh	Chittagong	23.8368	90.2774	22.7121	91.7303	2015	AS-S-FE	S258L	RCN00729	M74I/N75E/K76T/A220S/Q271E/I356T/R371I
11879	RCN00741	1148-PF-BD-MAUDE	Bangladesh	Chittagong	23.8368	90.2774	22.7121	91.7303	2015	AS-S-FE	S258L	RCN00741	M74I/N75E/K76T/A220S/Q271E/I356T/R371I
11880	RCN00759	1148-PF-BD-MAUDE	Bangladesh	Chittagong	23.8368	90.2774	22.7121	91.7303	2015	AS-S-FE	S258L	RCN00759	M74I/N75E/K76T/A220S/Q271E/I356T/R371I
11881	RCN00768	1148-PF-BD-MAUDE	Bangladesh	Chittagong	23.8368	90.2774	22.7121	91.7303	2015	AS-S-FE	S258L	RCN00768	M74I/N75E/K76T/A220S/Q271E/I356T/R371I
11882	RCN00776	1148-PF-BD-MAUDE	Bangladesh	Chittagong	23.8368	90.2774	22.7121	91.7303	2015	AS-S-FE	S258L	RCN00776	M74I/N75E/K76T/A220S/Q271E/I356T/R371I
11883	RCN00778	1148-PF-BD-MAUDE	Bangladesh	Chittagong	23.8368	90.2774	22.7121	91.7303	2015	AS-S-FE	S258L	RCN00778	M74I/N75E/K76T/A220S/Q271E/I356T/R371I
11884	RCN00779	1148-PF-BD-MAUDE	Bangladesh	Chittagong	23.8368	90.2774	22.7121	91.7303	2015	AS-S-FE	S258L	RCN00779	M74I/N75E/K76T/A220S/Q271E/I356T/R371I
11885	RCN00787	1148-PF-BD-MAUDE	Bangladesh	Chittagong	23.8368	90.2774	22.7121	91.7303	2015	AS-S-FE	S258L	RCN00787	M74I/N75E/K76T/A220S/Q271E/I356T/R371I
11886	RCN00790	1148-PF-BD-MAUDE	Bangladesh	Chittagong	23.8368	90.2774	22.7121	91.7303	2015	AS-S-FE	S258L	RCN00790	M74I/N75E/K76T/A220S/Q271E/I356T/R371I
11887	RCN00793	1148-PF-BD-MAUDE	Bangladesh	Chittagong	23.8368	90.2774	22.7121	91.7303	2015	AS-S-FE	S258L	RCN00793	M74I/N75E/K76T/A220S/Q271E/I356T/R371I
11890	RCN00794	1148-PF-BD-MAUDE	Bangladesh	Chittagong	23.8368	90.2774	22.7121	91.7303	2015	AS-S-FE	S258L	RCN00794	M74I/N75E/K76T/A220S/Q271E/I356T/R371I
11891	RCN00795	1148-PF-BD-MAUDE	Bangladesh	Chittagong	23.8368	90.2774	22.7121	91.7303	2015	AS-S-FE	S258L	RCN00795	M74I/N75E/K76T/A220S/Q271E/I356T/R371I
11892	RCN00798	1148-PF-BD-MAUDE	Bangladesh	Chittagong	23.8368	90.2774	22.7121	91.7303	2015	AS-S-FE	S258L	RCN00798	M74I/N75E/K76T/A220S/Q271E/I356T/R371I
11893	RCN00802	1148-PF-BD-MAUDE	Bangladesh	Chittagong	23.8368	90.2774	22.7121	91.7303	2015	AS-S-FE	S258L	RCN00802	M74I/N75E/K76T/A220S/Q271E/I356T/R371I
11894	RCN00807	1148-PF-BD-MAUDE	Bangladesh	Chittagong	23.8368	90.2774	22.7121	91.7303	2015	AS-S-FE	S258L	RCN00807	M74I/N75E/K76T/A220S/Q271E/N326S/I356T/R371I
11895	RCN00808	1148-PF-BD-MAUDE	Bangladesh	Chittagong	23.8368	90.2774	22.7121	91.7303	2015	AS-S-FE	S258L	RCN00808	M74I/N75E/K76T/A220S/Q271E/I356T/R371I
11896	RCN00810	1148-PF-BD-MAUDE	Bangladesh	Chittagong	23.8368	90.2774	22.7121	91.7303	2015	AS-S-FE	S258L	RCN00810	M74I/N75E/K76T/A220S/Q271E/N326S/I356T/R371I
11897	RCN00811	1148-PF-BD-MAUDE	Bangladesh	Chittagong	23.8368	90.2774	22.7121	91.7303	2015	AS-S-FE	S258L	RCN00811	M74I/N75E/K76T/A220S/Q271E/I356T/R371I
11898	RCN00816	1148-PF-BD-MAUDE	Bangladesh	Chittagong	23.8368	90.2774	22.7121	91.7303	2015	AS-S-FE	S258L	RCN00816	M74I/N75E/K76T/A220S/Q271E/N326S/I356T/R371I
11899	RCN00817	1148-PF-BD-MAUDE	Bangladesh	Chittagong	23.8368	90.2774	22.7121	91.7303	2015	AS-S-FE	S258L	RCN00817	M74I/N75E/K76T/A220S/Q271E/N326S/I356T/R371I
11900	RCN00833	1148-PF-BD-MAUDE	Bangladesh	Chittagong	23.8368	90.2774	22.7121	91.7303	2015	AS-S-FE	S258L	RCN00833	M74I/N75E/K76T/A220S/Q271E/I356T/R371I
11901	RCN00834	1148-PF-BD-MAUDE	Bangladesh	Chittagong	23.8368	90.2774	22.7121	91.7303	2015	AS-S-FE	S258L	RCN00834	M74I/N75E/K76T/A220S/Q271E/N326S/I356T/R371I
11902	RCN00839	1148-PF-BD-MAUDE	Bangladesh	Chittagong	23.8368	90.2774	22.7121	91.7303	2015	AS-S-FE	S258L	RCN00839	M74I/N75E/K76T/A220S/Q271E/N326S/I356T/R371I
11903	RCN00844	1148-PF-BD-MAUDE	Bangladesh	Chittagong	23.8368	90.2774	22.7121	91.7303	2015	AS-S-FE	S258L	RCN00844	M74I/N75E/K76T/A220S/Q271E/I356T/R371I
[truncated: 13,308 more rows]
