# Supplementary material for: Gain-of-function PfAAT1 mutations compensate for impaired PfCRT function in Plasmodium falciparum
Source: Research Square preprint supplement (doi:10.21203/rs.3.rs-9887667/v1), 2026-06-15
Supplement: Supplementary file 1 [file d771d4ff1a0f24a69cef2a83.pdf]

Supplementary Fig. 1

a.

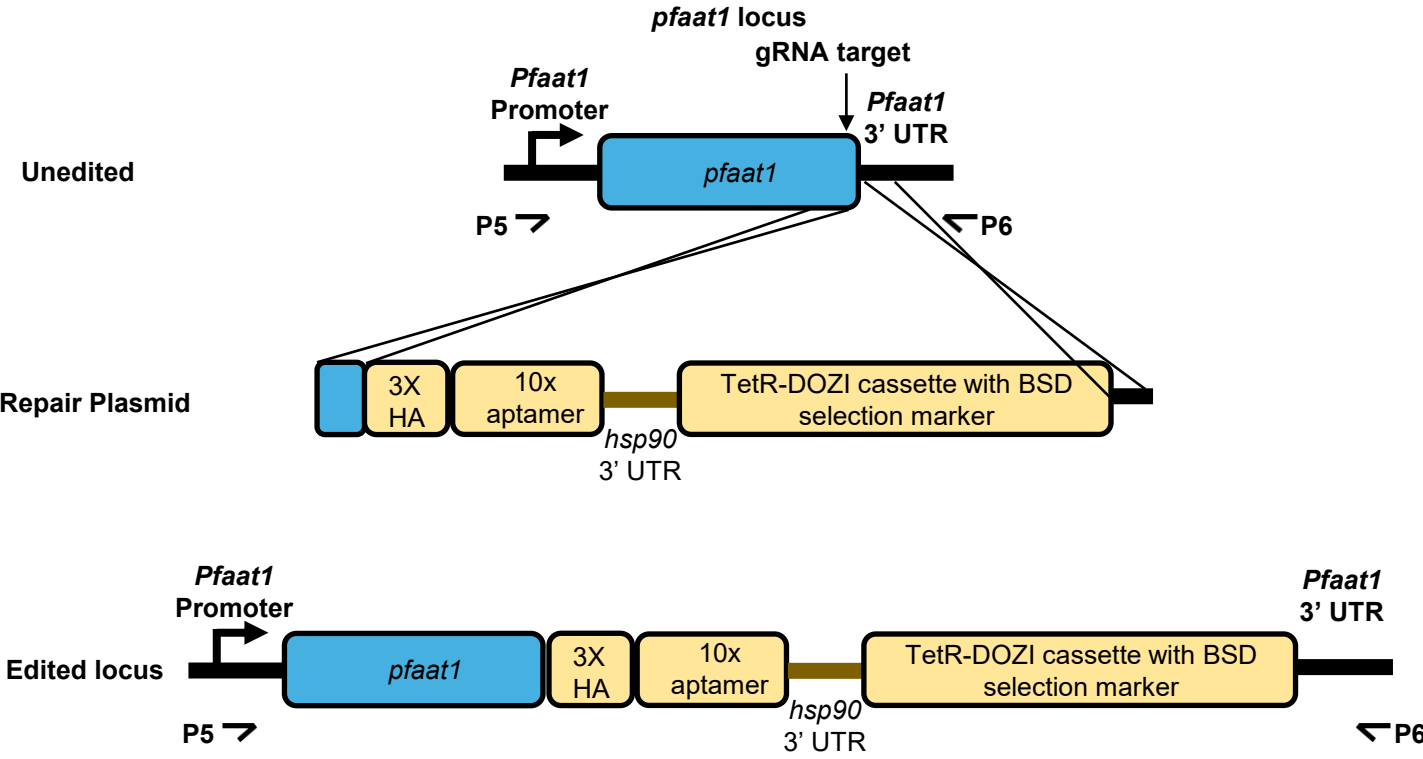

b.

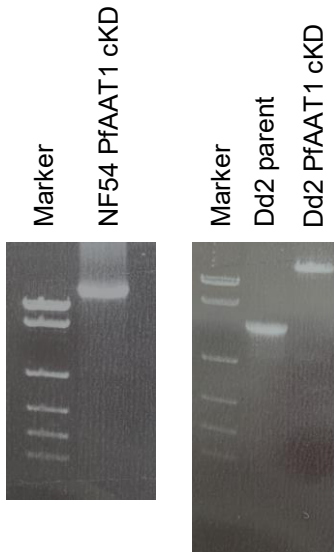

### Supplementary Fig. 1. Editing of the *pfcrt* locus.

a, Schematic representation of the CRISPR–Cas9–mediated genome editing strategy for epitope tagging and addition of a tunable aptamer cassette at the endogenous *pfcrt* locus. 5' and 3' homology regions between the genomic sequence and the repair cassette are indicated by connecting lines. Location for diagnostic PCR primer set (P5 and P6) are indicated. From the unedited *pfaat1* locus, it amplifies a product of 3226 bp and from edited locus a product of 10986 bp.

b, Diagnostic PCR of genomic DNA confirming successful editing.

Supplementary Fig. 2

NF54  
(CQ  
sensitive)

Dd2  
(CQ  
Resistant)

\*+aTc \*+aTc \*+aTc -aTc +aTc -aTc MW Marker

+aTc -aTc +aTc -aTc \*+aTc \*-aTc MW Marker

Anti HA

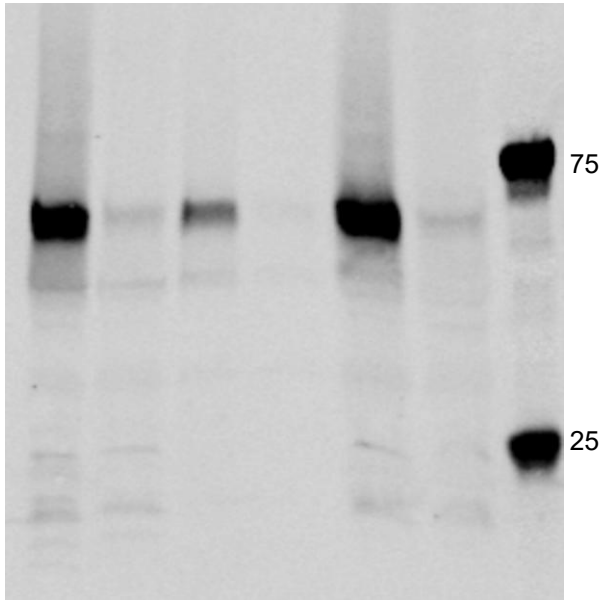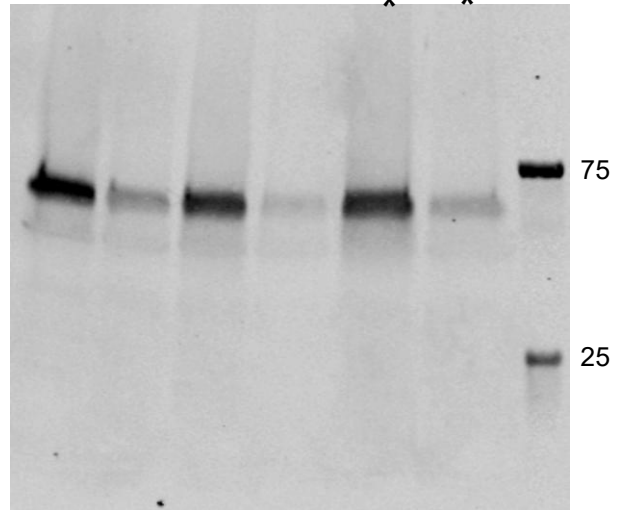

Anti PM5

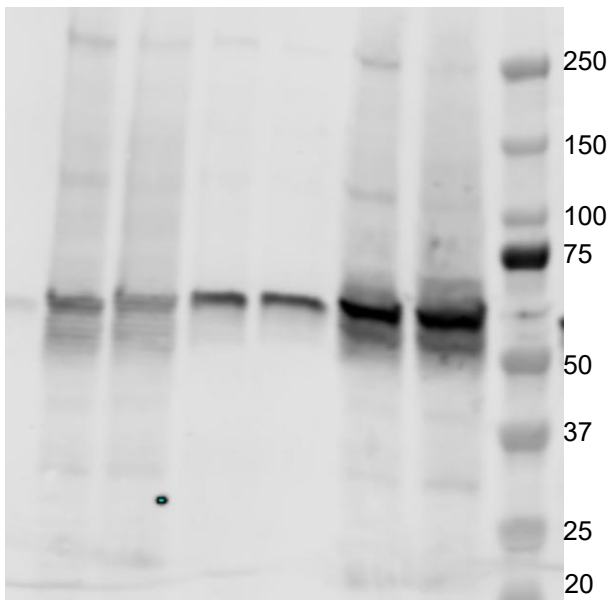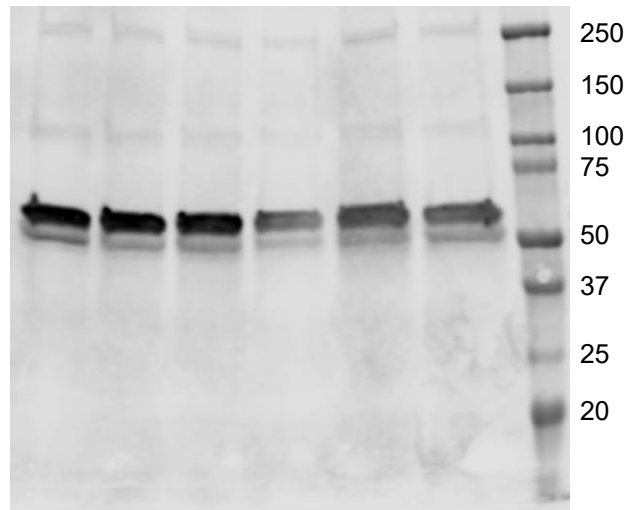

**Supplementary Fig. 2. Full western blot images of PfAAT1 conditional knockdown in parental NF54 and Dd2 strains.**

Three biological replicates of the knockdowns are shown. Lanes marked with asterisks (\*) correspond to those shown in Fig. 1b. Molecular weights of the marker bands are indicated.

Supplementary Fig. 3

(i) NF54

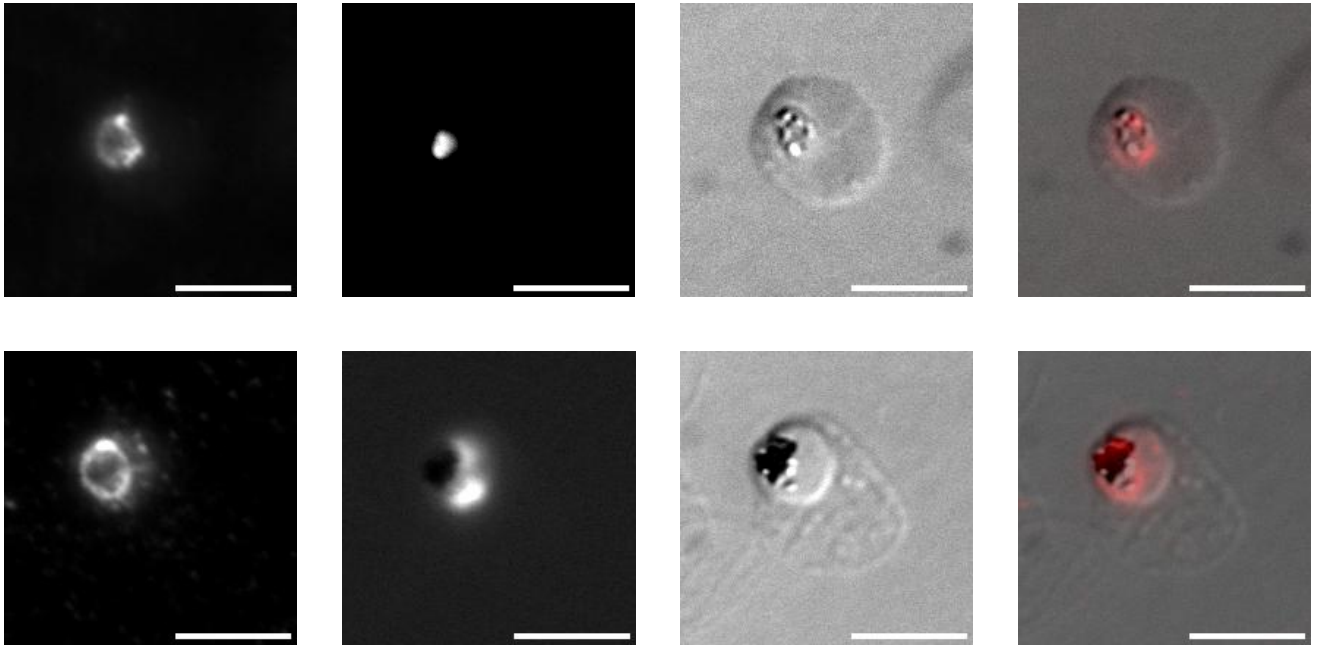

(ii) Dd2

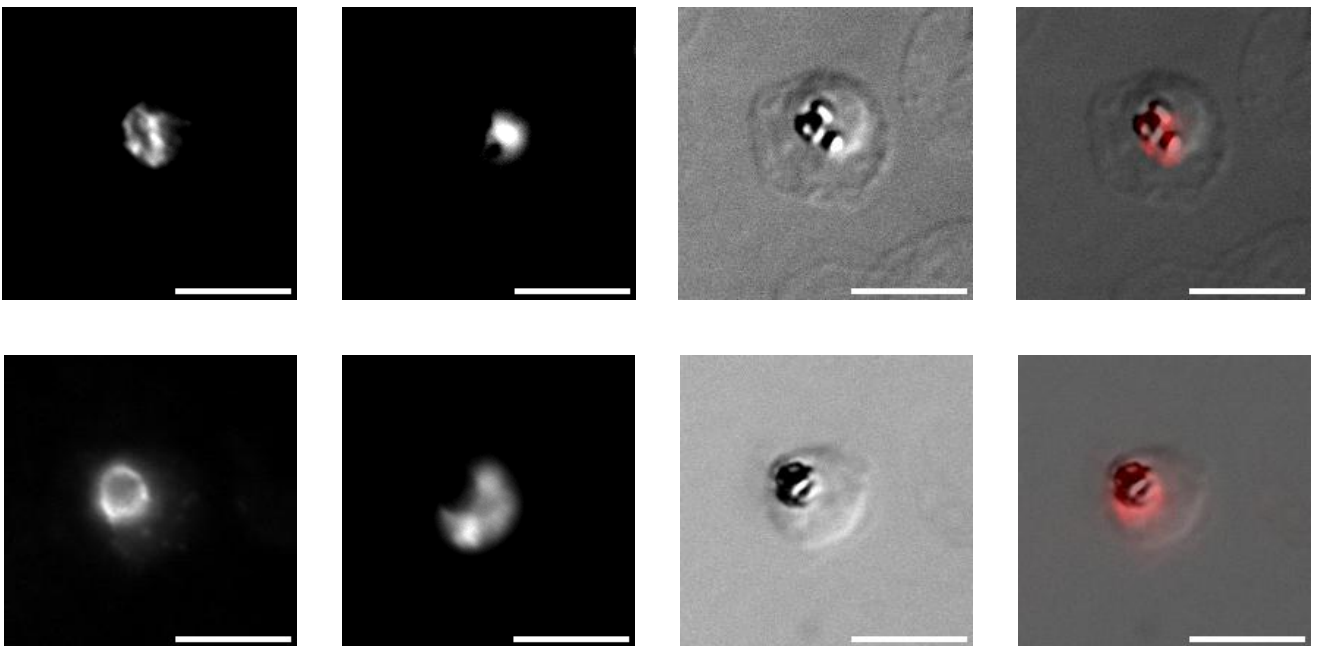

Anti  
HA

DAPI

Transmitted  
Light

HA: Red  
TL: Grey

**Supplementary Fig. 3. Localization of 3×HA-tagged PfAAT1 by immunofluorescence assay.** Representative images of (i) NF54 and (ii) Dd2 parasites expressing 3×HA-tagged PfAAT1 under +aTc conditions. Scale bars, 5 μm.

Supplementary Fig. 4

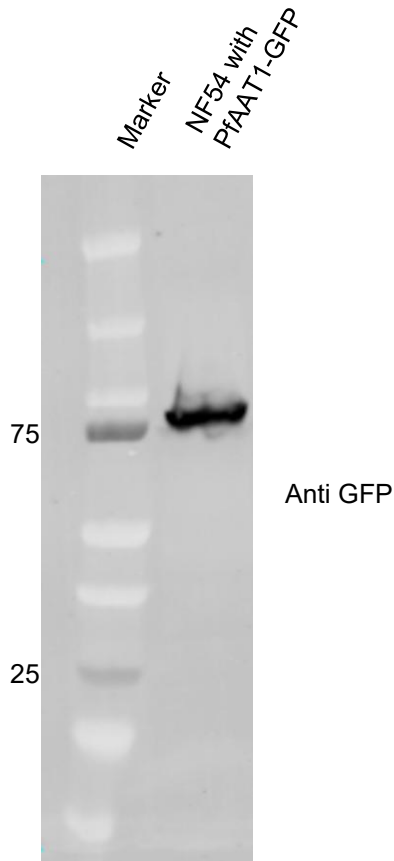

**Supplementary Fig. 4. Western blot showing expression of GFP-tagged PfAAT1.**

Note the higher molecular weight of GFP-tagged PfAAT1 compared to the 3×HA-tagged protein. Molecular weight markers are indicated.

Supplementary Fig. 5

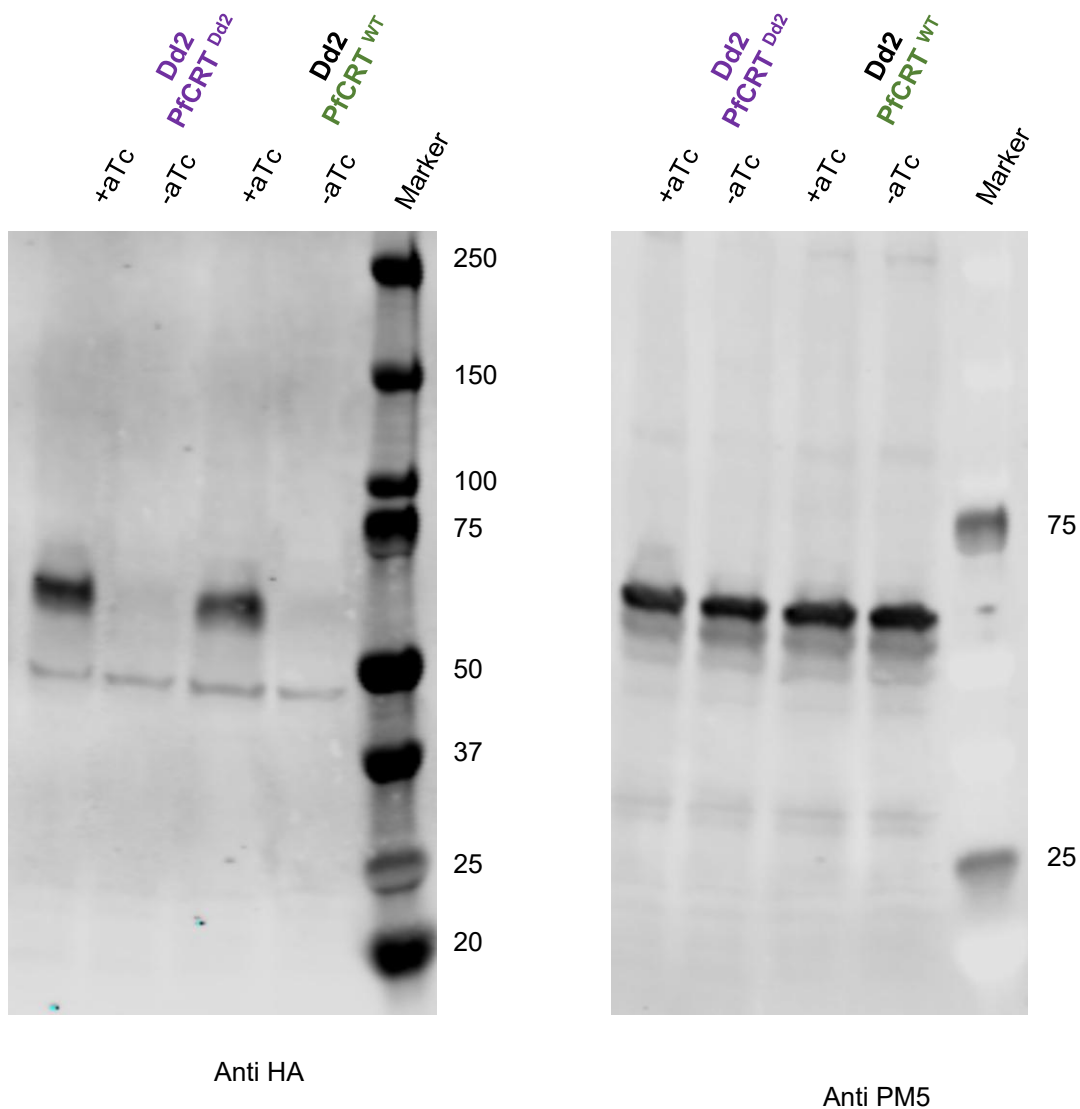

**Supplementary Fig. 5. Full western blot images of PfAAT1 conditional knockdown in an isogenic Dd2 parasite pair.**

Molecular weights of the bands in the marker lane are indicated on the sides. Data are representative of two independent experiments.

Supplementary Fig. 6

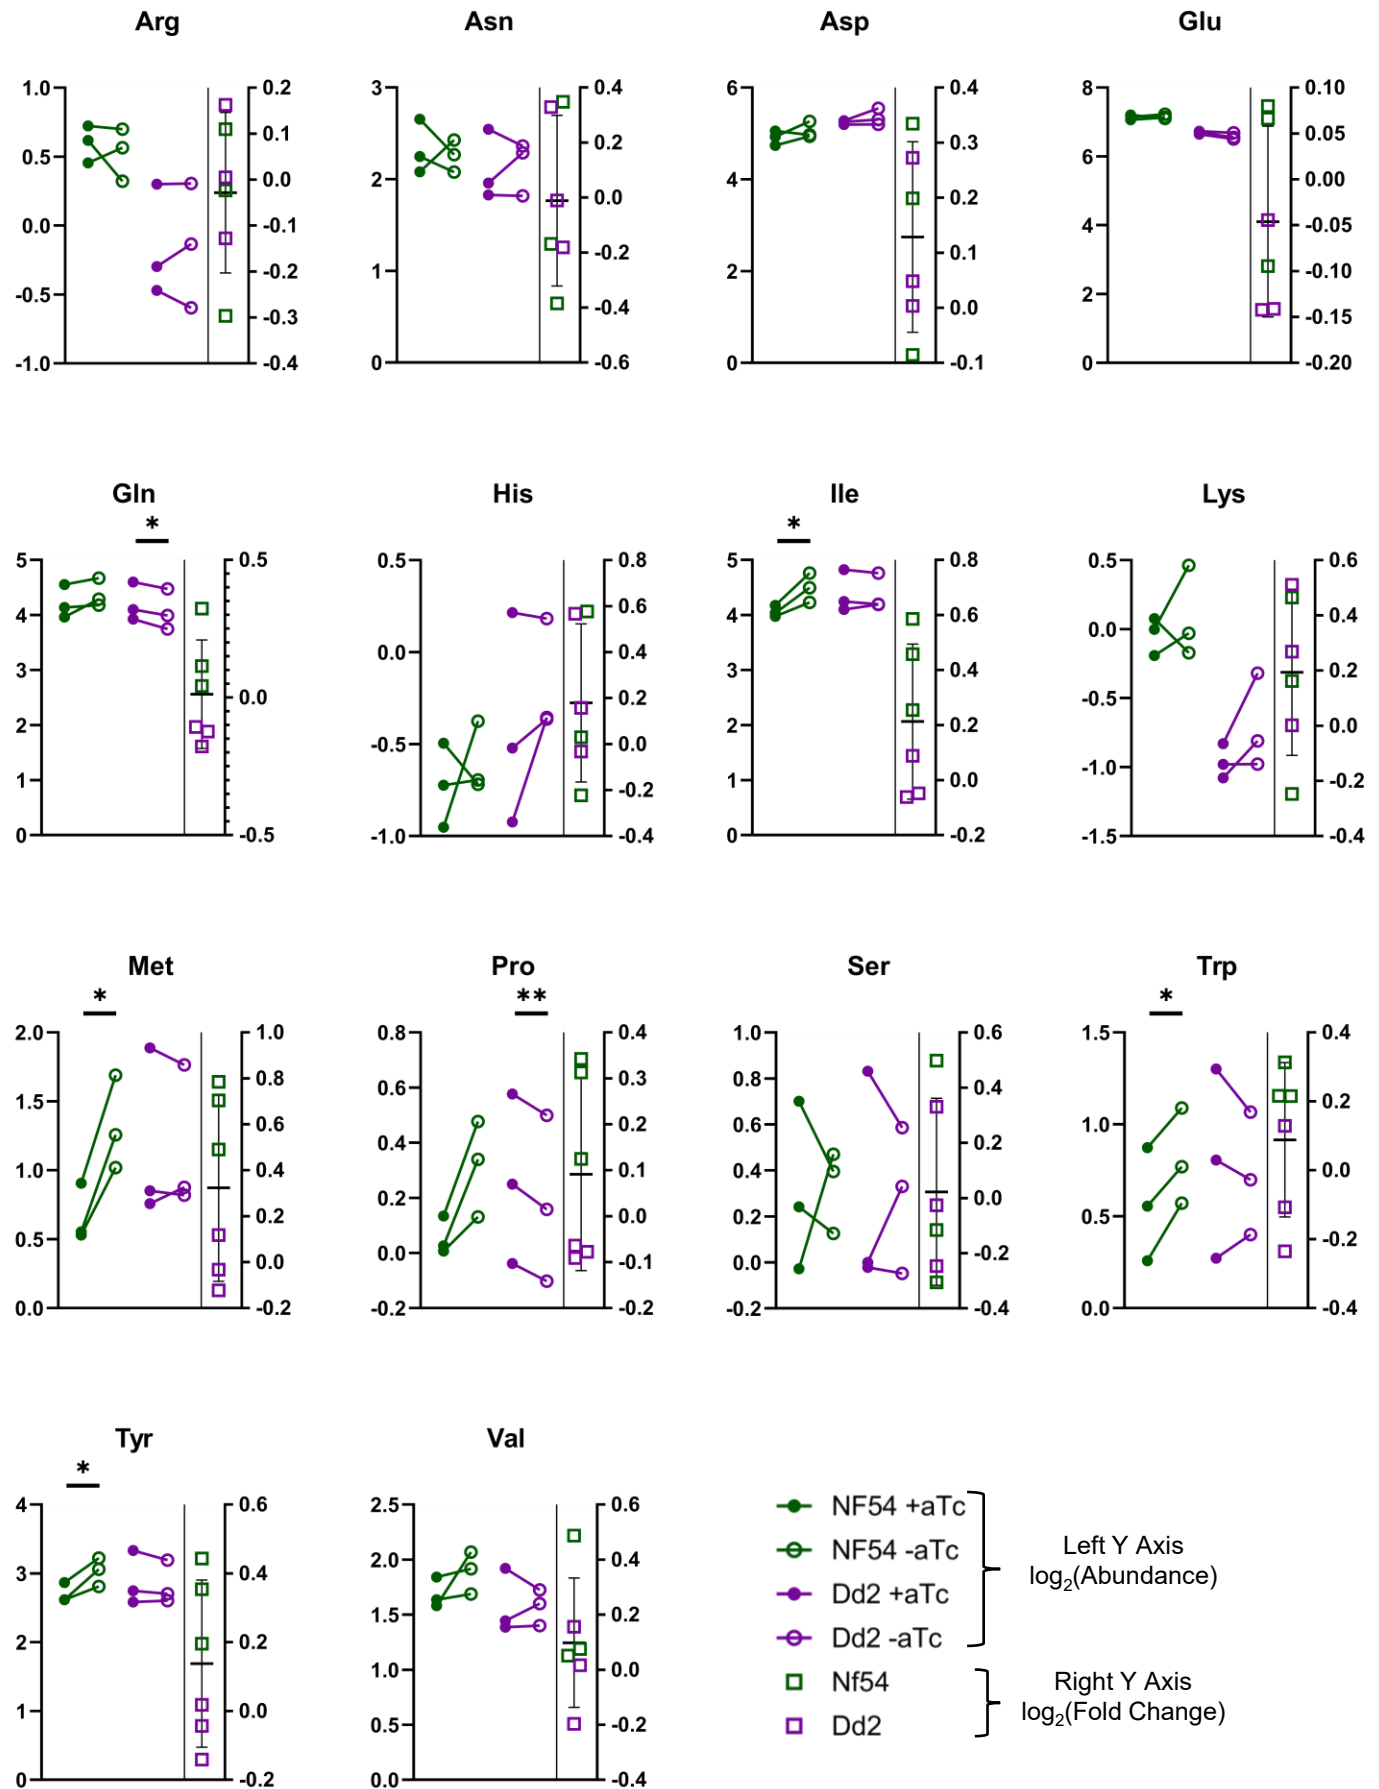

**Supplementary Fig. 6. Comparison of amino acid abundance between WT and PfAAT1 knockdown conditions.**

Abundance of individual amino acids in NF54 (green) and Dd2 (purple) parasites under +aTc and -aTc conditions. Left y axis shows  $\log_2$ -transformed, median-normalized abundance. Paired samples ( $n = 3$  per strain) are connected by lines. Statistical significance within each strain was assessed using paired t-tests and is indicated above the paired comparisons. Right y axis shows  $\log_2$  fold change (-aTc versus +aTc) for each paired sample ( $n = 6$  total). Individual fold-change values are plotted alongside the mean  $\pm$  95% confidence interval. Statistical significance of the combined dataset was assessed using a paired t-test and is indicated above the fold-change values (\* $P < 0.05$ , \*\* $P < 0.01$ , \*\*\* $P < 0.001$ , \*\*\*\* $P < 0.0001$ ). Only statistically significant differences are annotated.

Supplementary Fig. 7

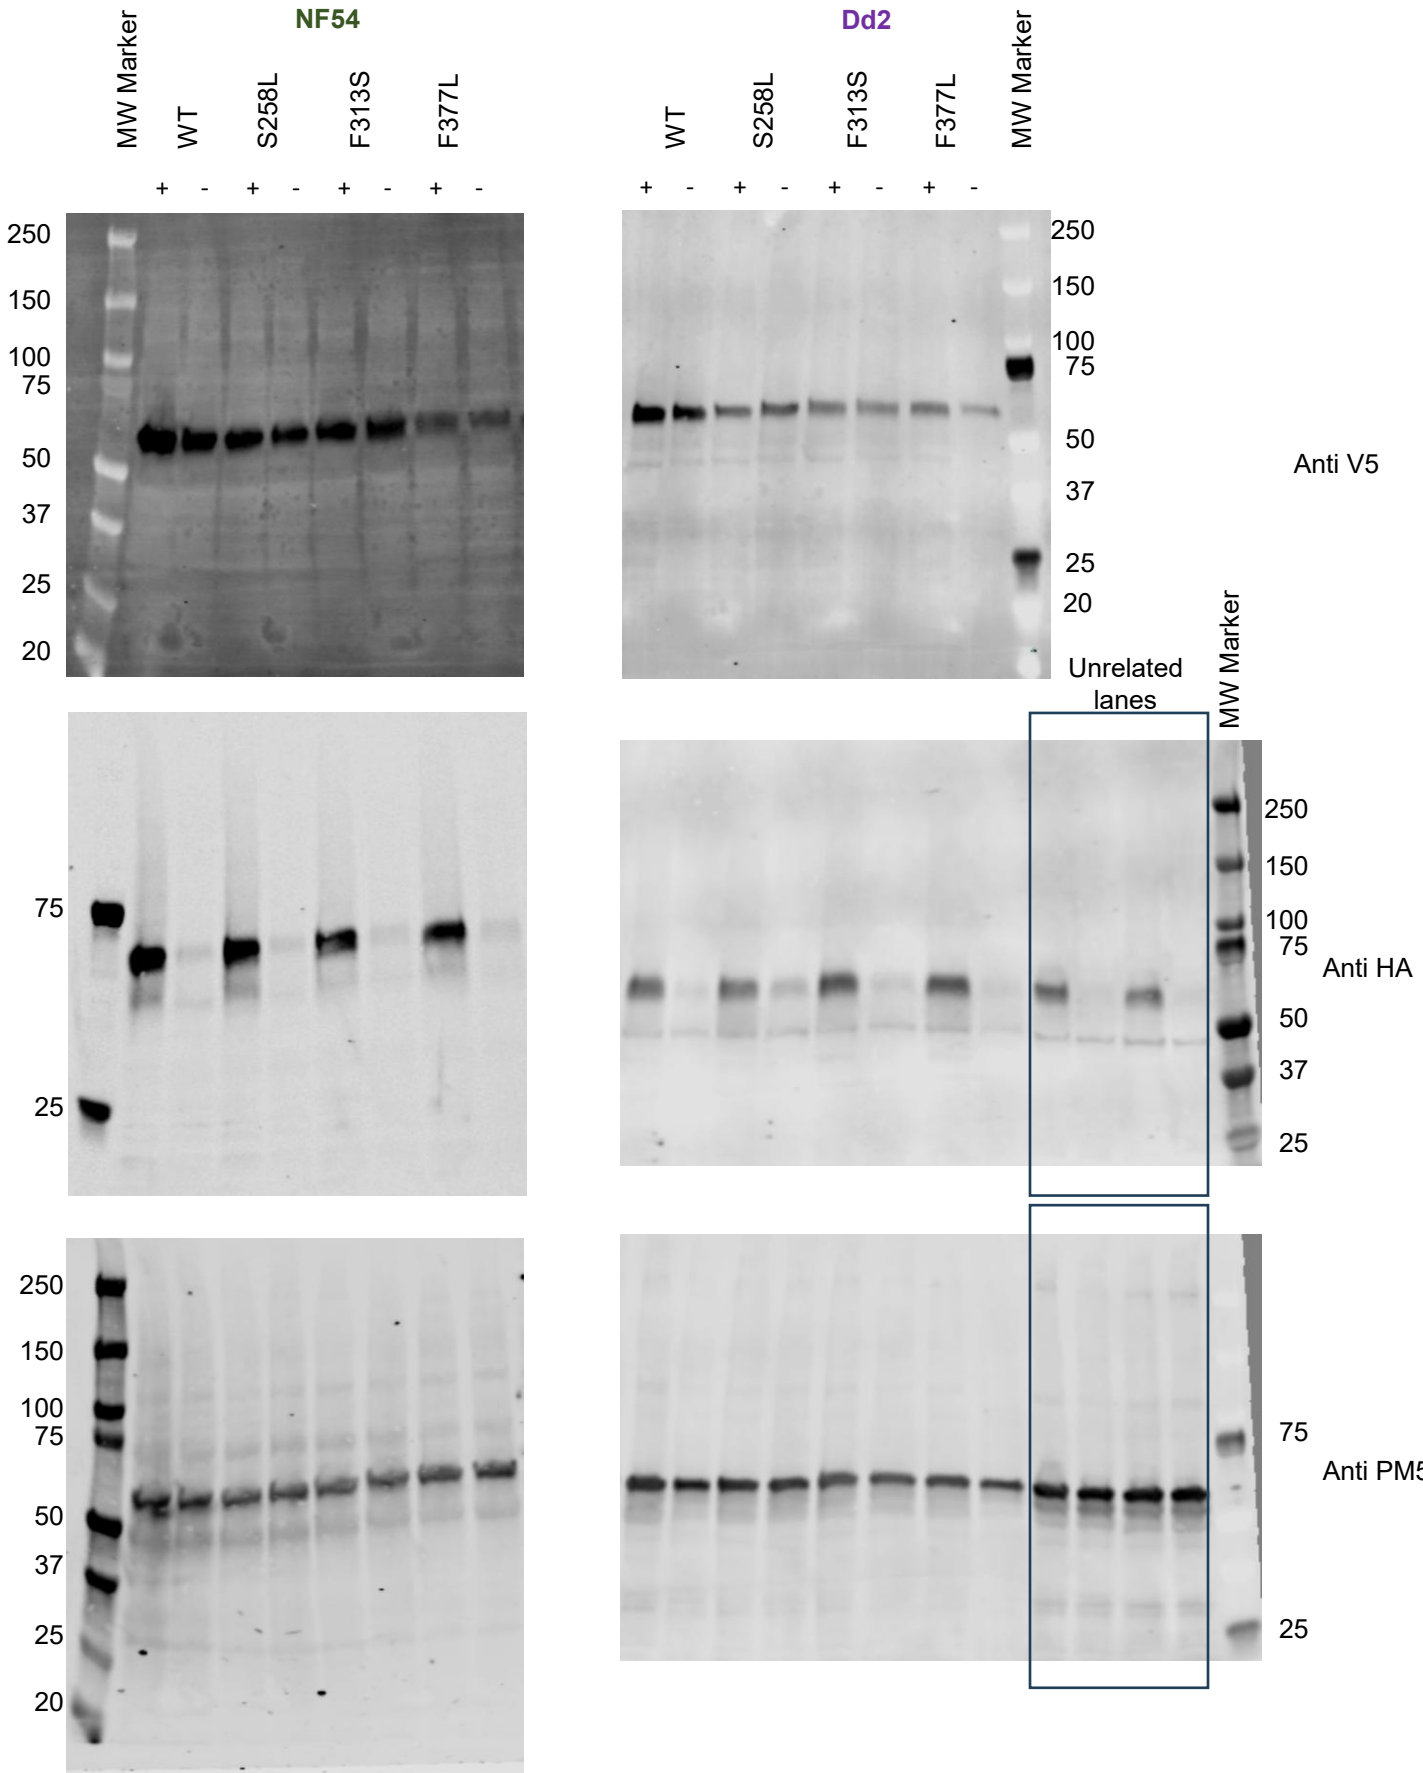

**Supplementary Fig. 7. Full western blot images of PfAAT1 conditional knockdown in NF54 and Dd2 strains expressing an N-terminally V5-tagged second copy of PfAAT1 from the cg6 locus.**

Molecular weights of the bands in the marker lane are indicated on the sides.  
Data are representative of two independent experiments.

Supplementary Fig. 8

(i) NF54  
Complemented with

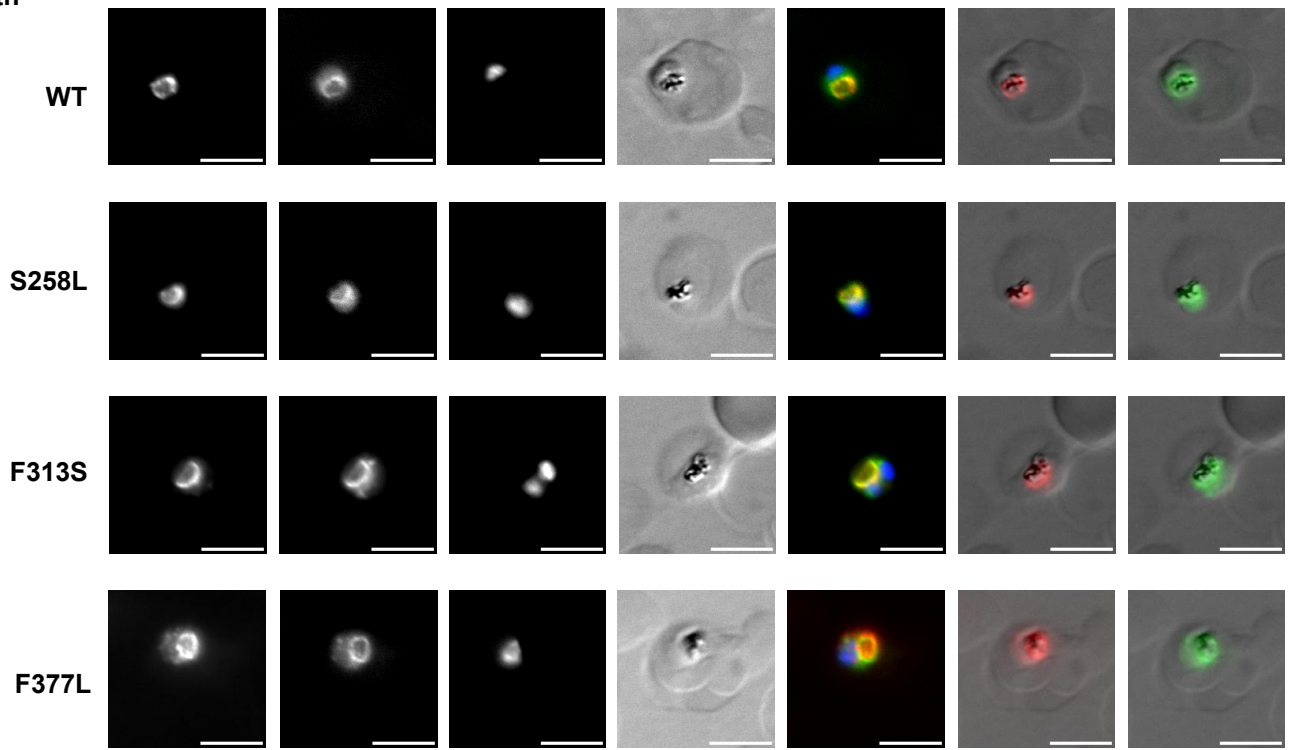

(ii) Dd2  
Complemented with

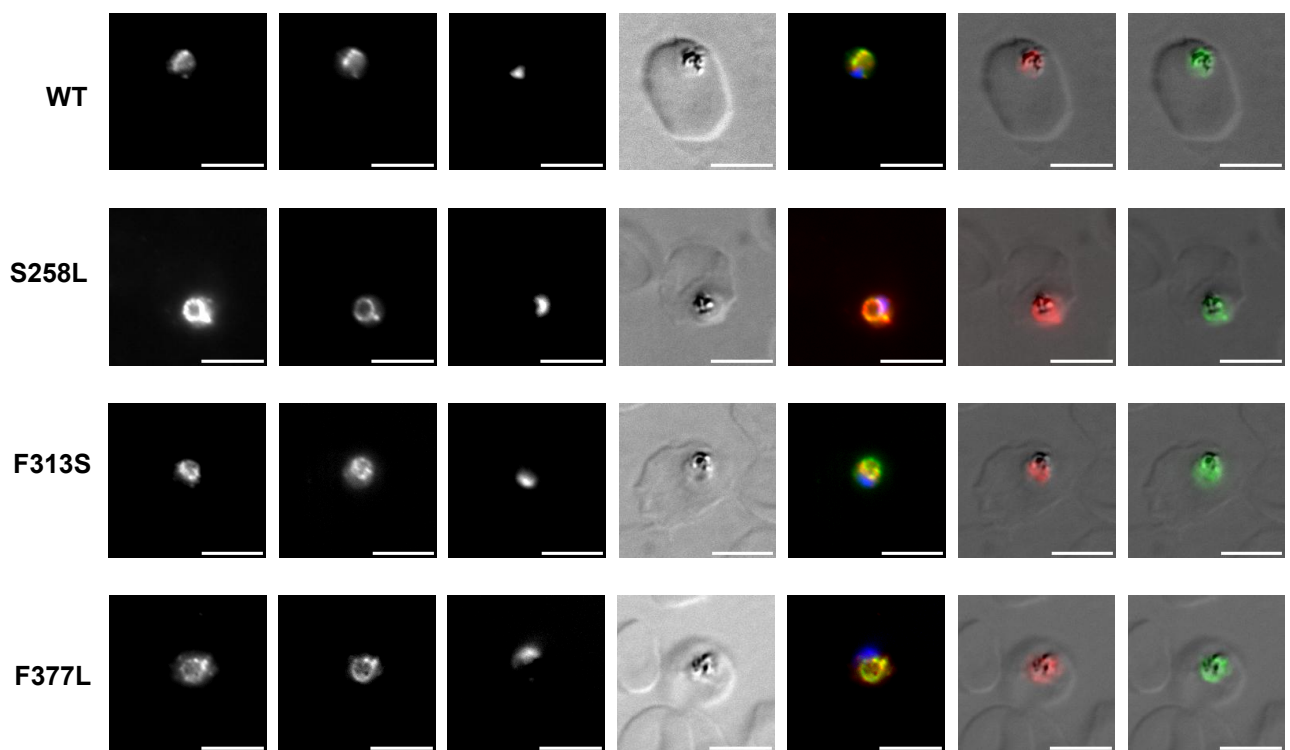

Anti HA

Anti V5

DAPI

Trans Light

HA: Red  
V5: Green  
Dapi: Blue

HA: Red  
TL: Grey

V5: Green  
TL: Grey

**Supplementary Fig. 8. Localization of endogenous and second-copy PfAAT1 by immunofluorescence assay.**

Representative images showing the localization of different PfAAT1 variants (V5-tagged) in NF54 (i) and Dd2 (ii) PfAAT1 (3×HA-tagged) conditional knockdown lines. Composite fluorescence images (column 5) are shown to illustrate the extent of colocalization between the endogenous and second-copy proteins. Anti-V5 and anti-HA channels are individually overlaid on the transmitted light channel (columns 6 and 7) to highlight their localization around the hemozoin crystal (visible as dark regions in the transmitted light channel). Scale bars, 5  $\mu\text{m}$ .

Supplementary Fig. 9

|                     |      | <i>pfaat1</i> allele |            |      |
|---------------------|------|----------------------|------------|------|
|                     |      | S258L & OR F313S     | Other SNPs | WT   |
| <i>pfcr1</i> allele | WT   | 4871                 | 142        | 1468 |
|                     | K76T | 8721                 | 62         | 43   |

P value and statistical significance

Test

Chi-square, df

P value

Chi-square

2157, 2

<0.0001

**Supplementary Fig. 9. Contingency table and chi-square statistics for assessing linkage between specified *pfcr1* and *pfaat1* alleles.**

Supplementary Fig. 10

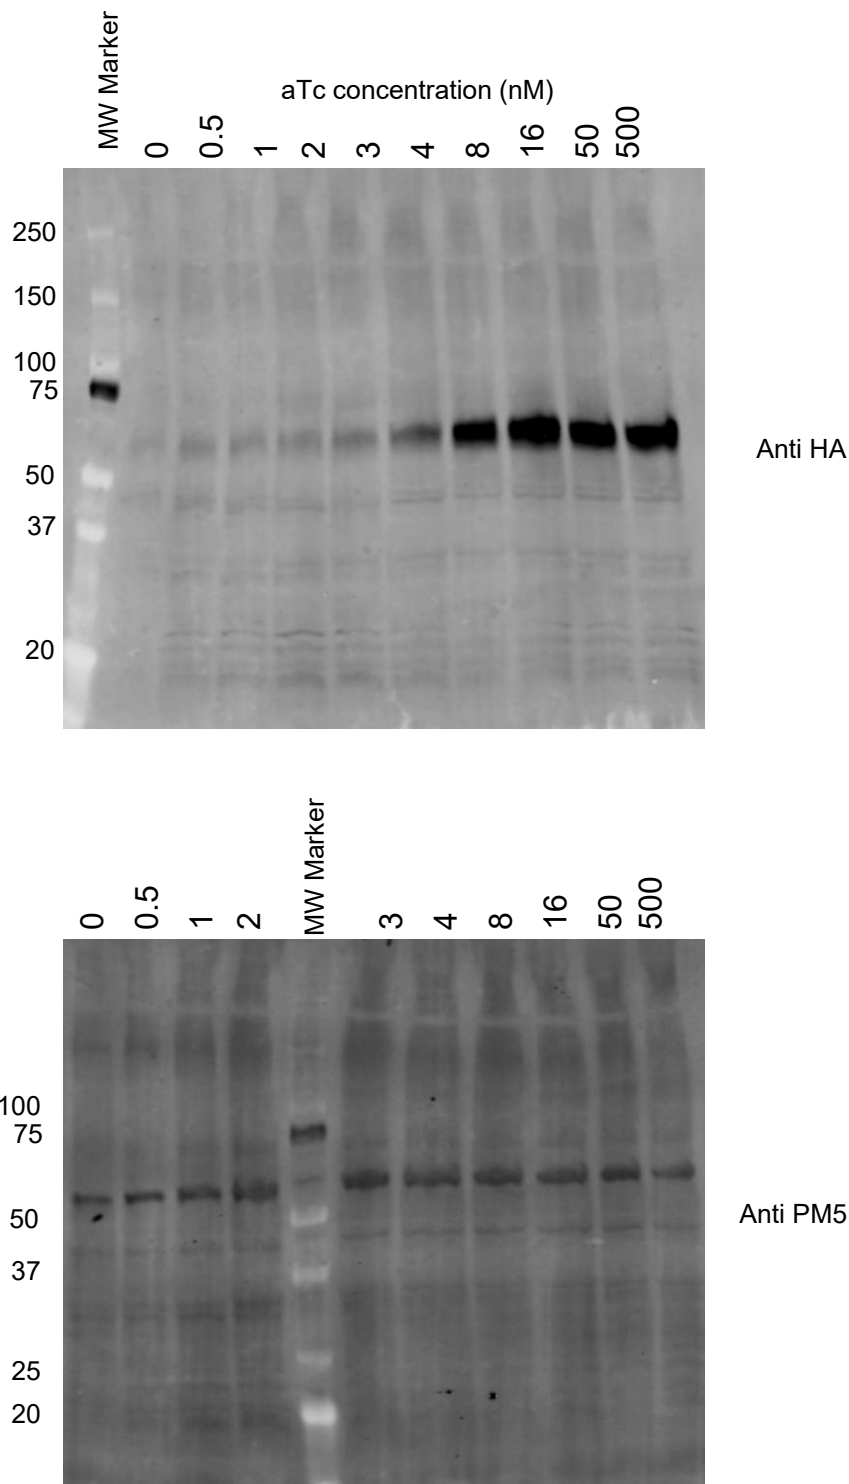

**Supplementary Fig. 10. Full western blot images showing tuning of PfAAT1 expression in Dd2 PfAAT1 conditional knockdown parasites.**

Samples were collected 48 h post-aTc washout and subsequent readdition at specified concentrations.

Supplementary Fig. 11

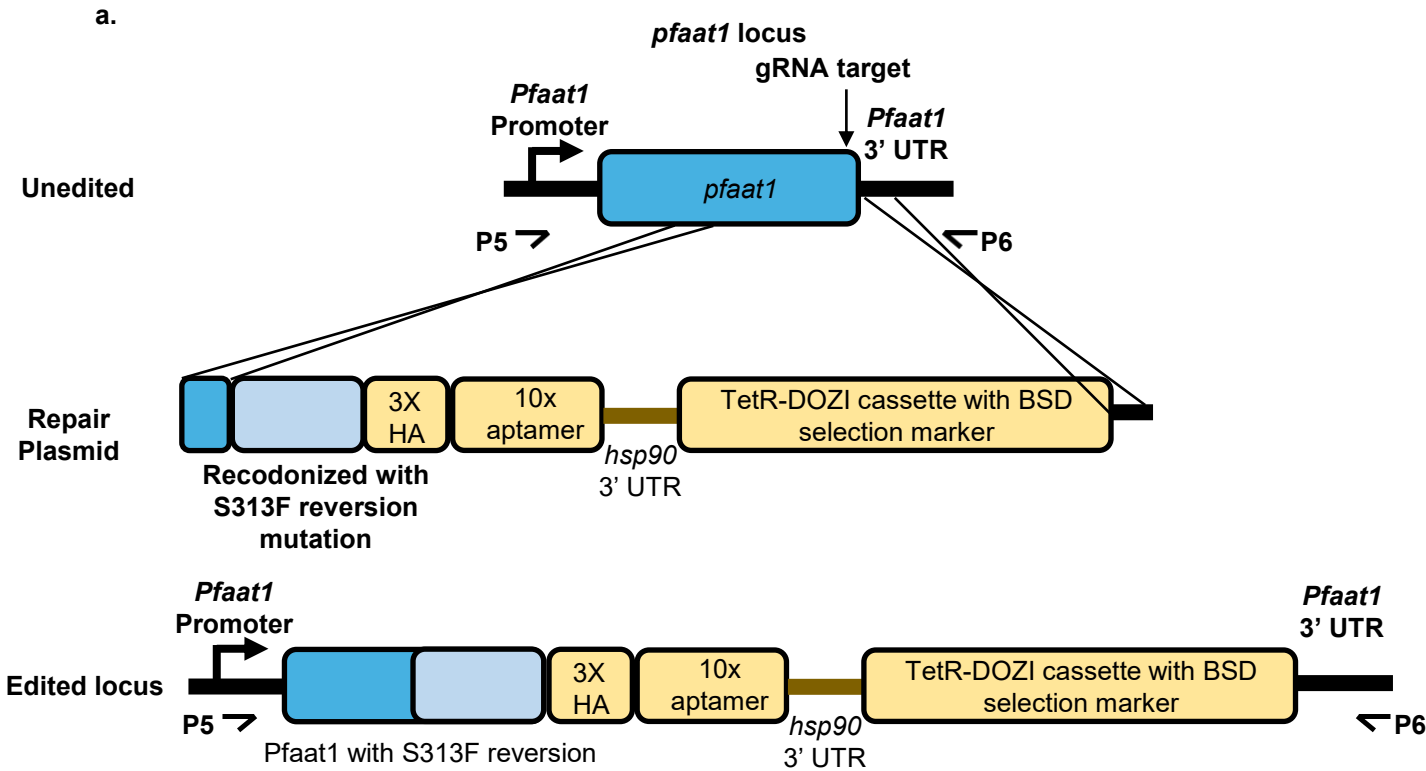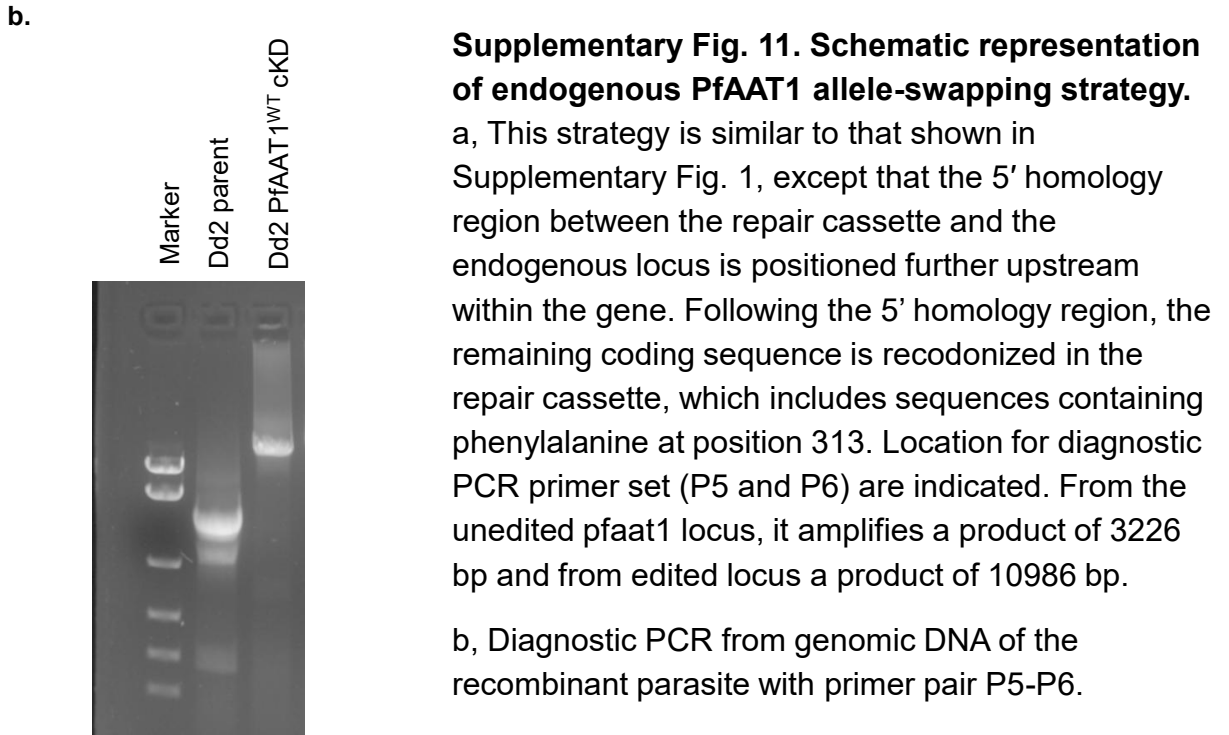

Supplementary Fig. 12

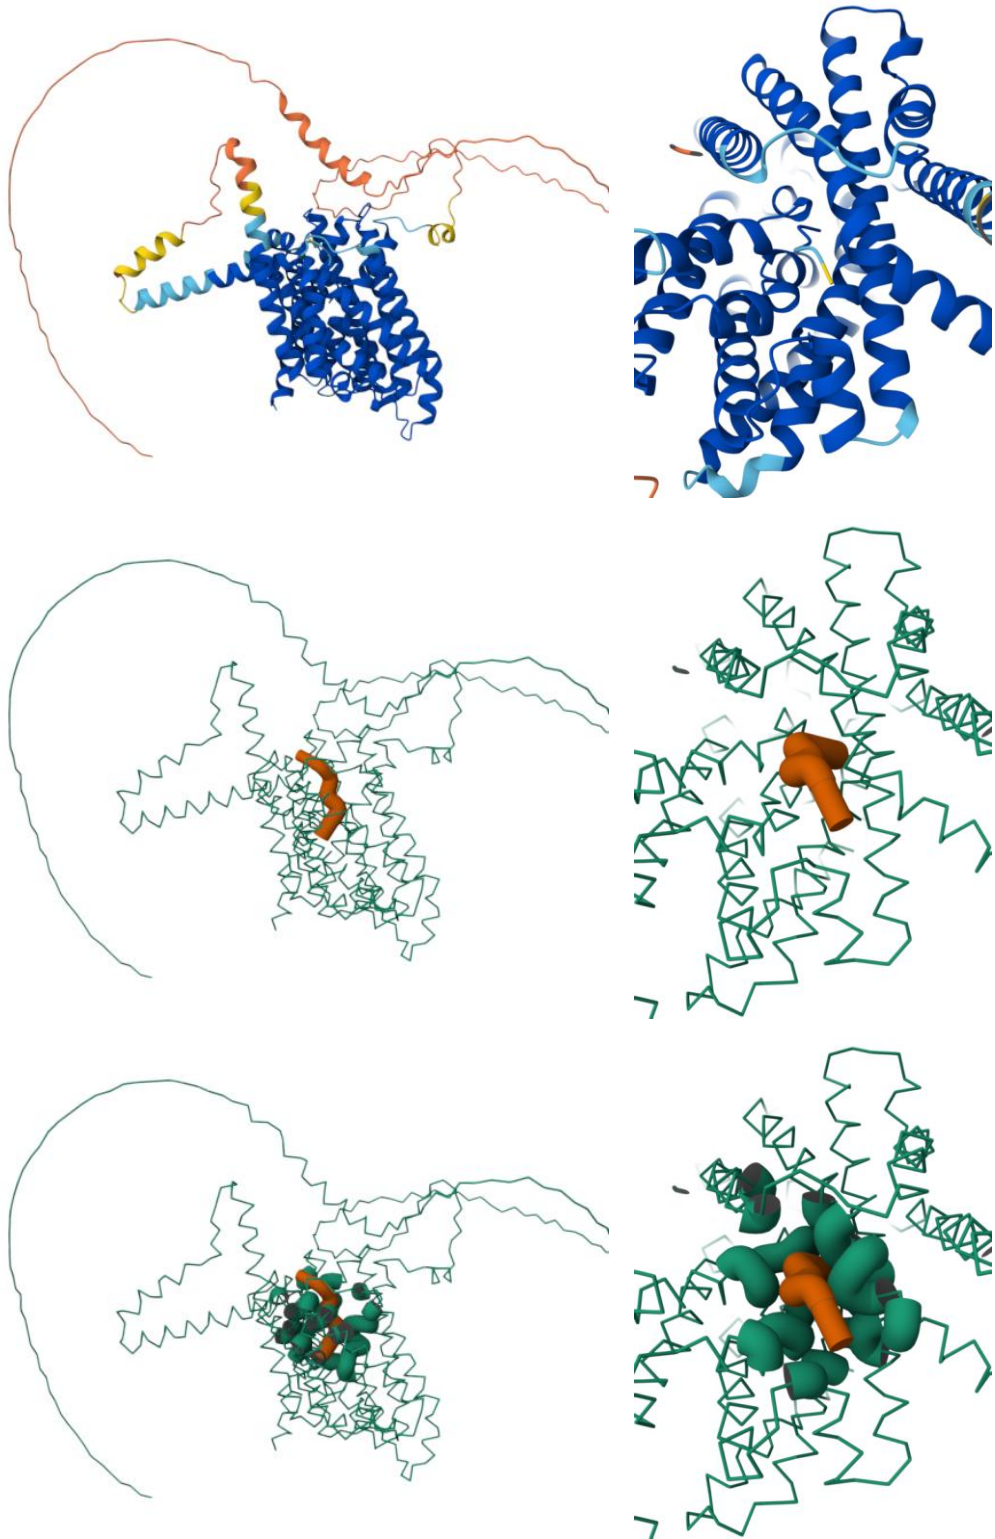

**Supplementary Fig. 12: AlphaFold prediction of PfAAT1 in complex with the Hb-derived hexapeptide VDPVNF from orthogonal views.**

Columns 1 and 2 show vertical and horizontal orientations, respectively.

Row 1, Cartoon representation. Colors indicate pLDDT confidence scores (>90, blue; 70–90, light blue; 50–70, yellow; <50, red).

Row 2, PfAAT1 backbone (green) with putty (brown) representation of the hexapeptide.

Row 3, PfAAT1 residues within 5 Å of the hexapeptide are highlighted in putty representation. Residue positions along the primary sequence are: 180–186, 231, 251–252, 255–256, 259, 362, 368–369, 372, 447–454, 553, and 557.

**Supplementary Table 1.**

| Oligo | Sequence                                                                                                       | Purpose                                                                  |
|-------|----------------------------------------------------------------------------------------------------------------|--------------------------------------------------------------------------|
| G1    | ATTTAAGGTTGTCACTACAACGG                                                                                        | gRNA                                                                     |
| P1    | CATTGACTGTGCCGGCCGGCCTCTGAATATAC<br>AAATGATCCATACC                                                             | Forward primer for LHR amplification                                     |
| P2    | CGTCATAAGGGTAGGCGATCGCTAAAATTTAA<br>TTTAAGGTTGTTACGAC                                                          | Reverse primer for LHR amplification                                     |
| P3    | CAAACCCGGAATTCGAGCTCGGGAACATAGTT<br>TTTCTTTTTCTTTTTGAAATACC                                                    | Forward primer for RHR amplification                                     |
| P4    | GACCTAGGGATAACAGGGTAATAGGGGTCTG<br>TAAGTATTTAATCATGAC                                                          | Reverse primer for RHR amplification                                     |
| P5    | CATCTTCCCTTACATTATATATATTGTAAACAT<br>ATTAGATAACAGTGTTTTGGG                                                     | Forward Primer for diagnostic PCR                                        |
| P6    | CTTTTGCCCTCTACATATTATTCAATCATATAA<br>TTAGTATATAATAAAAATATTTTCAG                                                | Reverse Primer for diagnostic PCR                                        |
| P7    | CGAATAAACACGATTTTTTCTCGAGATGAATAA<br>AAAGTATGGTACGTCTCGAATAAC                                                  | Forward primer for GFP tagged PfAAT1<br>amplification                    |
| P8    | CATAATGTGCTGCACCTGGCCTAGGTAAAATT<br>AAATTTAAGGTTGTCACTACAACG                                                   | Reverse primer for GFP tagged PfAAT1<br>amplification                    |
| P9    | TCGAATAAACACGATTTTTTCTCGAGATGGGA<br>AAACCGATTCCCTAACCCATTATTGGGCCTGGA<br>TAGCACTAATAAAAAGTATGGTACGTCTCGA<br>AT | Forward primer for v5 tagged PfAAT1<br>amplification                     |
| P10   | ATATTATATAACTCGACGCGGCCGCTTATAAA<br>ATTAAATTTAAGTTGTC                                                          | Reverse primer for v5 tagged PfAAT1<br>amplification                     |
| P11   | CATTGACTGTGCCGGCCGGCCGATATATCTG<br>ATGGGGATTATACTAATGATG                                                       | Forward primer for LHR amplification for PfAAT1<br>allelic swap          |
| P12   | CAAGGAGAAGAGGCTGAATATAAGAAAGTGAT<br>TTAATGATCCGACTTTATTTCTAAATG                                                | Reverse primer for LHR amplification for PfAAT1<br>allelic swap          |
| P13   | CATTTAGAAATAAAGTCGGATCATTAAATCACT<br>TTCTTATATTCAGCCTCTTCTCCTTG                                                | Forward primer for human codon optimized Part<br>of PfAAT1 amplification |
| P14   | CGTCATAAGGGTAGGCGATCGCCAAGATAAG<br>ATTCAAAGTTGTAACGAC                                                          | Reverse primer for human codon optimized Part<br>of PfAAT1 amplification |
