# Supplementary material for: Gain-of-function PfAAT1 mutations compensate for impaired PfCRT function in Plasmodium falciparum
Source: Research Square preprint supplement (doi:10.21203/rs.3.rs-9887667/v1), 2026-06-15
Supplement: Supplementary file 2 [file c4a7eb9d228174a10eadab59.xlsx]

## Sheet: Raw counts
	NF54withaTC-1-bio1	NF54withaTC-1-bio2	NF54withaTC-1-bio3	NF54withaTC-2-bio1	NF54withaTC-2-bio2	NF54withaTC-2-bio3	NF54withaTC-3-bio1	NF54withaTC-3-bio2	NF54withaTC-3-bio3	NF54noaTC-1-bio1	NF54noaTC-1-bio2	NF54noaTC-1-bio3	NF54noaTC-2-bio1	NF54noaTC-2-bio2	NF54noaTC-2-bio3	NF54noaTC-3-bio1	NF54noaTC-3-bio2	NF54noaTC-3-bio3	Dd2withaTC-1-bio1	Dd2withaTC-1-bio2	Dd2withaTC-2-bio1	Dd2withaTC-2-bio2	Dd2withaTC-2-bio3	Dd2withaTC-3-bio1	Dd2withaTC-3-bio2	Dd2withaTC-3-bio3	Dd2noaTC-1-bio1	Dd2noaTC-1-bio2	Dd2noaTC-1-bio3	Dd2noaTC-2-bio1	Dd2noaTC-2-bio2	Dd2noaTC-2-bio3	Dd2noaTC-3-bio1	Dd2noaTC-3-bio2	Dd2noaTC-3-bio3
ribose (1)	1.37478e+06	3.17892e+06	2.92447e+06	1.91463e+06	1.91085e+06	2.22914e+06	1.42199e+06	1.34445e+06	1.65528e+06	5.16446e+06	2.67569e+06	2.25845e+06	6.19092e+06	4.10519e+06	2.4212e+06	5.92431e+06	3.8583e+06	3.49349e+06	5.27487e+06	3.82228e+06	6.28441e+06	4.62599e+06	3.566e+06	8.94916e+06	2.68345e+06	3.8843e+06	4.48888e+06	3.21143e+06	3.32581e+06	6.8869e+06	3.9927e+06	3.86715e+06	5.57881e+06	3.91197e+06	2.49857e+06
guanine (1)	435387	1.04867e+06	4.61053e+06	487624	971926	5.60295e+06	513615	827610	2.94559e+06	705490	1.10359e+06	3.57503e+06	775424	1.5722e+06	3.14824e+06	704686	1.30967e+06	3.45706e+06	1.1694e+06	1.791e+06	1.16065e+06	1.9817e+06	4.29321e+06	1.13936e+06	1.89535e+06	3.91423e+06	719641	1.65819e+06	4.5542e+06	779718	1.86653e+06	4.7599e+06	713774	1.75933e+06	5.24329e+06
N-acetyl-L-ornithine (1)	1.92275e+06	3.32883e+06	5.07714e+06	2.27135e+06	3.0913e+06	4.99889e+06	2.45264e+06	3.35889e+06	3.44129e+06	2.70295e+06	5.0237e+06	6.58134e+06	2.44095e+06	5.22819e+06	5.83827e+06	2.52496e+06	4.69905e+06	6.20168e+06	1.08106e+07	2.76855e+07	1.01314e+07	2.74859e+07	1.55135e+07	1.1498e+07	2.8196e+07	1.3656e+07	9.80688e+06	4.08211e+07	2.61383e+07	9.6052e+06	3.84277e+07	2.93008e+07	8.84113e+06	3.83759e+07	2.6957e+07
cytidine (1)	8.92368e+08	947208504	773143315	8.57982e+08	8.69906e+08	7.36515e+08	9.35376e+08	9.52967e+08	6.73076e+08	855958998	8.35944e+08	6.88622e+08	7.75385e+08	8.78893e+08	6.82824e+08	762828604	8.38737e+08	6.59892e+08	9.27249e+08	8.05175e+08	9.07554e+08	808467519	5.96327e+08	9.8392e+08	8.18773e+08	5.36526e+08	7.62641e+08	9.71599e+08	9.01894e+08	731520970	9.40754e+08	1215161283	7.16801e+08	963254183	9.34354e+08
6-phospho-D-gluconate (1)	1.30396e+07	1.2399e+07	1.6152e+07	1.27262e+07	1.22717e+07	1.4566e+07	1.378e+07	1.1723e+07	1.53065e+07	1.24615e+07	1.33557e+07	1.31294e+07	1.06651e+07	1.61037e+07	1.25584e+07	1.08302e+07	1.65845e+07	1.47665e+07	9.52382e+06	9.26963e+06	9.96692e+06	9.28883e+06	7.34616e+06	1.15104e+07	8.38756e+06	7.24033e+06	7.56798e+06	8806345	1.00679e+07	7.12424e+06	8.15315e+06	1.03618e+07	7.40505e+06	8.44698e+06	1.01004e+07
fructose-1-6-bisphosphate (1)	9.11739e+07	6.99457e+07	7.07353e+07	8.22312e+07	6.51768e+07	6.4454e+07	8.42936e+07	5.91938e+07	7.24623e+07	8.86935e+07	8.09641e+07	6.47558e+07	8.12785e+07	8.84064e+07	6.4872e+07	8.33235e+07	9.34379e+07	7.3343e+07	101742156	5.88622e+07	1.17579e+08	5.92576e+07	6.16692e+07	128299298	5.81306e+07	5.74843e+07	6.39826e+07	5.98847e+07	8.56703e+07	6.10865e+07	5.79428e+07	9.00962e+07	6.46102e+07	5.49478e+07	8.85419e+07
DL-Pipecolic Acid (1)	2.65254e+07	3.69098e+07	4.90851e+07	2.86586e+07	3.5592e+07	4.76474e+07	2.99247e+07	3.85159e+07	3.72631e+07	2.31137e+07	4.10365e+07	4.49377e+07	1.98696e+07	4.39855e+07	4.35599e+07	2.03642e+07	4.02786e+07	4.5654e+07	1.70904e+07	3.45823e+07	1.5893e+07	3.4663e+07	3.00934e+07	1.8213e+07	3.54911e+07	2.69952e+07	1.36357e+07	3.57207e+07	3.90933e+07	1.32055e+07	3.51804e+07	4.6741e+07	1.22541e+07	3.56751e+07	4.24386e+07
Hexose (1)	7.06409e+07	1.26434e+08	1.12031e+08	7.48576e+07	6.03579e+07	8.86493e+07	62488140	3.79324e+07	7.2168e+07	2.19692e+08	1.05481e+08	8.75566e+07	2.51641e+08	1.69239e+08	9.91884e+07	2.52591e+08	1.63746e+08	136854758	2.11774e+08	1.41847e+08	2.55149e+08	1.95845e+08	1.42251e+08	374180562	1.08488e+08	1.7045e+08	1.92678e+08	130020775	1.36329e+08	2.90687e+08	1.55007e+08	1.57437e+08	2.4907e+08	1.7544e+08	9.46598e+07
dGMP/AMP (1)	1.15912e+07	3.06805e+07	6.51907e+07	1.96326e+07	5.55181e+07	8.64649e+07	1.80598e+07	4.66896e+07	6.13521e+07	1.54232e+07	4.02946e+07	5.94755e+07	1.47786e+07	3.78125e+07	4.00662e+07	1.46199e+07	3.53031e+07	4.3479e+07	1.7561e+07	2.8965e+07	1.85122e+07	2.91437e+07	4.1562e+07	2.03801e+07	2.83285e+07	3.55029e+07	1.43107e+07	30734180	4.72817e+07	1.34653e+07	3.2369e+07	4.97354e+07	12892098	31418460	4.52563e+07
PTT (1)	549357	845107	1.22249e+06	517787	819552	1.18339e+06	657656	960941	903477	432780	1.04265e+06	1.38802e+06	406498	987659	1.38404e+06	379619	1.02377e+06	1.3057e+06	1.91272e+06	3.66533e+06	1.53165e+06	3.48702e+06	2.5291e+06	2.01818e+06	4.15486e+06	2.41066e+06	1.45917e+06	6.01422e+06	4.94135e+06	1.54905e+06	5.5442e+06	5.82894e+06	1.44556e+06	6.2368e+06	5.60703e+06
dihydroorotate (1)	2.79696e+06	4.4175e+06	7.05094e+06	5.85751e+06	4.50317e+06	6.3576e+06	3.88861e+06	4.87086e+06	6.61271e+06	3.44573e+06	5.94687e+06	8.2435e+06	3.27902e+06	5.92761e+06	8.32054e+06	3.50065e+06	5.64778e+06	7.69577e+06	1.99539e+06	4.38747e+06	2.4289e+06	4.29699e+06	4.59671e+06	2.61856e+06	4.07864e+06	4.00519e+06	1.6398e+06	5.26793e+06	6.73358e+06	1.74449e+06	8.59746e+06	8.6238e+06	1.71855e+06	4.98103e+06	7.58789e+06
NAD+ (1)	151159927	2.33437e+08	2.60507e+08	1.68138e+08	2.31087e+08	2.54056e+08	1.8501e+08	2.20891e+08	2.44268e+08	1.61645e+08	2.37544e+08	2.43467e+08	1.5158e+08	2.3591e+08	2.25859e+08	1.50558e+08	2.34439e+08	2.39008e+08	2.00193e+08	1.8684e+08	2.04611e+08	187678898	1.73331e+08	2.29311e+08	1.82512e+08	1.63275e+08	1.28528e+08	1.91494e+08	2.45842e+08	1.24145e+08	1.8153e+08	2.55483e+08	1.15693e+08	1.80224e+08	2.31706e+08
Nicotinic acid mononucleotide (1)	10891690	2.03693e+07	2.13287e+07	1.87966e+07	2.02709e+07	2.0972e+07	1.78363e+07	1.84723e+07	1.81702e+07	1.70186e+07	2.35556e+07	1.90096e+07	1.46617e+07	2.28097e+07	1.52883e+07	1.51502e+07	1.89666e+07	1.81347e+07	1.68794e+07	1.97411e+07	1.77611e+07	2.02285e+07	1.4564e+07	1.97106e+07	2.00666e+07	1.22059e+07	9.73655e+06	1.95556e+07	1.97989e+07	7.65031e+06	1.67782e+07	2.10226e+07	8.81524e+06	1.84533e+07	2.03457e+07
hydroxyproline/Aminolevulinate (1)	2.45643e+07	2.63999e+07	2.77309e+07	2.12851e+07	2.0679e+07	2.42243e+07	2.39826e+07	2.66554e+07	2.63562e+07	2.63159e+07	2.51201e+07	2.58478e+07	2.40598e+07	3.10747e+07	2.72752e+07	2.4136e+07	2.91882e+07	2.58889e+07	2.88201e+07	2.07792e+07	2.84806e+07	2.37232e+07	2.10513e+07	3.30737e+07	2.15605e+07	2.07824e+07	1.78541e+07	2.16764e+07	2.54485e+07	2.04843e+07	2.20462e+07	3.64943e+07	1.96973e+07	2.37703e+07	2.51055e+07
asparagine (1)	6.96798e+07	7.27766e+07	8.02246e+07	5.94358e+07	5.30258e+07	6.80512e+07	7.40597e+07	8.17595e+07	8.11659e+07	6.43588e+07	7.10997e+07	9.02101e+07	5.35435e+07	8.0546e+07	1.03002e+08	4.84163e+07	7.37093e+07	7.7645e+07	7.30259e+07	5.05423e+07	6.63966e+07	5.61423e+07	5.47503e+07	7.8351e+07	5.5443e+07	5.32408e+07	4.55534e+07	6.13232e+07	8.80387e+07	4.86751e+07	6.12105e+07	130154989	4.40563e+07	7.35867e+07	9.70396e+07
fructose-6-phosphate/glucose-1-phosphate (1)	1.50257e+08	1.84291e+08	1.53998e+08	1.7912e+08	1.2423e+08	1.37532e+08	1.99603e+08	1.28513e+08	1.49393e+08	1.69766e+08	202573894	1.59085e+08	1.63908e+08	2.59372e+08	1.68863e+08	1.50057e+08	2.32253e+08	1.86705e+08	2.25683e+08	2.42123e+08	2.28189e+08	2.74747e+08	2.11764e+08	2.56271e+08	251598173	1.99074e+08	1.60308e+08	2.83018e+08	3.64812e+08	1.51174e+08	292529298	3.55859e+08	1.46492e+08	3.05505e+08	368200443
isoleucine (1)	1.67911e+08	2.69069e+08	3.7326e+08	2.02814e+08	2.08109e+08	3.09332e+08	2.09641e+08	2.11293e+08	2.16947e+08	291346101	2.98146e+08	3.5177e+08	3.1873e+08	3.81573e+08	358980051	3.17198e+08	3.22626e+08	427283073	2.89821e+08	2.54519e+08	336613068	2.97511e+08	2.64587e+08	4.42132e+08	2.33102e+08	262177514	2.1287e+08	3.19794e+08	3.9407e+08	2.89876e+08	3.40714e+08	396852685	2.22238e+08	3.52962e+08	3.77826e+08
N-acetyl-glutamate (1)	4.72429e+06	8.7131e+06	1.09162e+07	5.25486e+06	8.3003e+06	1.02776e+07	5.70749e+06	7.85258e+06	9.46026e+06	5.64132e+06	9.43075e+06	1.00009e+07	5248041	9.54812e+06	8.68661e+06	5.51013e+06	8.56229e+06	9.29641e+06	5.222e+06	6.21987e+06	5.50371e+06	6.32213e+06	5.70986e+06	6.20777e+06	6.33141e+06	5.02161e+06	3.5795e+06	6.10318e+06	8.25047e+06	3.35765e+06	5.93848e+06	1.01699e+07	3.10033e+06	7.19429e+06	8.25774e+06
hypoxanthine (1)	3.49886e+07	5.94245e+07	7.00868e+07	4.75474e+07	3.41114e+07	5.8593e+07	4.30166e+07	2.31671e+07	2.86097e+07	1.17065e+08	5.98842e+07	5.65249e+07	1.39376e+08	9.05625e+07	6.06045e+07	1.28495e+08	7.15467e+07	8.58336e+07	1.60738e+08	1.1925e+08	200303687	1.41421e+08	1.1328e+08	2.62519e+08	1.04971e+08	1.12288e+08	9.78053e+07	1.20982e+08	1.3767e+08	1.43333e+08	1.29207e+08	1.2395e+08	1.05218e+08	1.3001e+08	1.20647e+08
glutamine (1)	2.56803e+08	2.95772e+08	3.10399e+08	2.30204e+08	2.02288e+08	2.5469e+08	2.70087e+08	2.73523e+08	2.8221e+08	3.17486e+08	2.88265e+08	3.14222e+08	2.87942e+08	3.50914e+08	3.54619e+08	2.6942e+08	3.27883e+08	3.12357e+08	2.58287e+08	2.19075e+08	2.86806e+08	2.56806e+08	232552735	3.66824e+08	2.18239e+08	2.4307e+08	1.77801e+08	2.31711e+08	3.16058e+08	2.26176e+08	2.39153e+08	4.01811e+08	1.90614e+08	2.75555e+08	305392154
glucono-lactone (1)	7.47901e+06	4.24223e+06	3.16315e+06	9.6321e+06	2.94106e+06	2.317e+06	1.01876e+07	3.87671e+06	2.58073e+06	1.4747e+07	5.66282e+06	3.66712e+06	1.25997e+07	5.6388e+06	4.36552e+06	1.33019e+07	4.41091e+06	3.57726e+06	2.52817e+07	5.97585e+06	2.51034e+07	5.93674e+06	4.81994e+06	2.90001e+07	5.62876e+06	3.42951e+06	4.97726e+06	4.98001e+06	6.64898e+06	4.85427e+06	5.33676e+06	1.00858e+07	4.4149e+06	4.88613e+06	6.83324e+06
methionine (1)	1.78928e+07	2.62145e+07	3.38507e+07	2.08905e+07	1.8151e+07	2.7432e+07	2.14592e+07	1.90207e+07	1.91232e+07	3.5273e+07	2.93582e+07	3.54551e+07	3.80039e+07	4.26863e+07	3.88919e+07	3.72701e+07	3.63572e+07	4.60114e+07	3.74674e+07	2.49682e+07	4.41036e+07	2.95268e+07	2.50766e+07	5.83388e+07	2.28589e+07	2.5052e+07	2.62314e+07	3.15347e+07	3.91939e+07	3.61685e+07	3.48172e+07	3.81734e+07	2.84588e+07	3.55078e+07	3.50587e+07
D-sedoheptulose-1/7-phosphate (1)	1.19691e+07	2.23071e+07	2.73725e+07	1.69019e+07	1.85481e+07	2.59157e+07	1.94799e+07	1.86511e+07	2.71248e+07	1.64363e+07	2.72279e+07	3.50334e+07	1.55038e+07	3.0558e+07	3.40495e+07	1.53404e+07	2.76728e+07	3.89622e+07	2.69543e+07	2.45906e+07	2.5588e+07	2.61791e+07	2.62027e+07	2.99642e+07	2.51723e+07	2.39035e+07	2.00796e+07	2.68395e+07	4.16118e+07	1.96944e+07	2.77787e+07	4.2483e+07	1.87024e+07	2.85734e+07	4.29329e+07
aspartate (1)	229731757	4.87807e+08	6.41344e+08	3.09751e+08	4.94301e+08	6.36375e+08	320029837	4.59194e+08	3.91957e+08	353923541	5.70268e+08	6.48479e+08	3.54809e+08	6.01987e+08	6.05668e+08	3.43876e+08	4.96523e+08	6.93578e+08	4.05843e+08	5.81658e+08	4.52796e+08	5.88035e+08	5.81311e+08	5.18709e+08	569899429	4.98107e+08	3.42086e+08	7.42946e+08	9.66223e+08	3.4675e+08	7.23787e+08	1007444908	3.00603e+08	7.23387e+08	1011715117
proline (1)	1.21406e+07	1.67308e+07	1.97446e+07	1.14575e+07	1.32941e+07	1.82411e+07	1.16603e+07	1.38795e+07	1.7431e+07	1.59808e+07	1.71172e+07	2.00209e+07	1.5946e+07	2.17938e+07	2.14143e+07	1.58405e+07	1.95872e+07	2.23416e+07	1.60897e+07	1.44777e+07	1.80271e+07	1.59966e+07	1.65173e+07	2.20223e+07	1.40285e+07	1.65048e+07	1.13002e+07	1.62249e+07	2.20142e+07	1.39328e+07	1.79361e+07	2.79061e+07	1.26255e+07	1.75571e+07	2.18373e+07
4-Pyridoxic acid (1)	5.38856e+06	6.31555e+06	5.0775e+06	3.93163e+06	6.25885e+06	5.00987e+06	4.12127e+06	5.35067e+06	7.51911e+06	5.53777e+06	8.46837e+06	7.54002e+06	6.22092e+06	5.34777e+06	4.31448e+06	4.85822e+06	5.97745e+06	6.50906e+06	7.16189e+06	6.80527e+06	7.45438e+06	9.0523e+06	3.83185e+06	9.47897e+06	5.77337e+06	3.82926e+06	4.34851e+06	6.93884e+06	4.38939e+06	2.73131e+06	4.66652e+06	8.54052e+06	4.08285e+06	7.61407e+06	6.85087e+06
2_3-Diphosphoglyceric acid (1)	854941571	665823553	857862548	9.06316e+08	6.59977e+08	8.42037e+08	8.5983e+08	6.03612e+08	7.50609e+08	1062119576	8.34248e+08	7.6624e+08	9.2507e+08	8.88048e+08	7.31143e+08	1009314228	9.40734e+08	811112521	8.62252e+08	5.98509e+08	9.42017e+08	5.95706e+08	660154398	1029459673	5.62086e+08	6.233e+08	6.69871e+08	6.37469e+08	7.65325e+08	6.51218e+08	6.32684e+08	8.89666e+08	705114677	6.74453e+08	8.00378e+08
fumarate (1)	3.70355e+07	6.10095e+07	8.5564e+07	4.11846e+07	6.00177e+07	8.23313e+07	4.32839e+07	5.64751e+07	7.645e+07	3.85427e+07	6.05193e+07	7.58839e+07	3.49412e+07	6.75682e+07	7.64126e+07	3.72165e+07	6.42049e+07	8.17564e+07	2.76315e+07	3.06161e+07	2.65758e+07	3.15055e+07	3.04697e+07	2.98566e+07	2.98286e+07	2.75048e+07	2.0696e+07	3.30328e+07	4.09216e+07	2.02918e+07	3.38411e+07	5.09676e+07	2.05814e+07	3.72788e+07	4.64431e+07
PE (1)	1.26825e+07	2.46136e+07	3.25144e+07	1.80073e+07	2.47013e+07	3.04766e+07	1.95515e+07	2.42532e+07	2.04071e+07	2.019e+07	3.30062e+07	4.1544e+07	1.82822e+07	3.53645e+07	3.88377e+07	1.8865e+07	2.94384e+07	4.27709e+07	1.21157e+08	3.19401e+08	122992260	3.21107e+08	1.58427e+08	1.38226e+08	3.29339e+08	1.41831e+08	1.16462e+08	4.4787e+08	3.75826e+08	1.12285e+08	4.3041e+08	3.98473e+08	1.05846e+08	4.38713e+08	3.94339e+08
FAD (1)	1.111e+06	1.83068e+06	2.51357e+06	1.08199e+06	1.94044e+06	2.60644e+06	1.23421e+06	1.74415e+06	2.45778e+06	1.26413e+06	1.84983e+06	2.04065e+06	1.03778e+06	1.91956e+06	1.91721e+06	1238605	2.24606e+06	2.17829e+06	1.128e+06	1.35158e+06	1.1988e+06	1.33874e+06	1.29445e+06	1.40304e+06	1.17981e+06	1.27043e+06	876611	1.36121e+06	1.77851e+06	908105	1.27598e+06	1.76316e+06	938190	1.49085e+06	1.7464e+06
alanine/sarcosine (1)	5.62979e+06	5.99439e+06	8.98383e+06	4.68239e+06	5.13511e+06	7.74769e+06	5.74286e+06	7.44071e+06	8.85702e+06	4.1691e+06	6.09337e+06	9.81052e+06	3.70345e+06	6.80246e+06	1.01586e+07	3.65253e+06	6.79587e+06	8.75843e+06	1.12527e+07	5.95743e+06	9.19606e+06	6.10233e+06	6.26934e+06	9.66489e+06	6.7138e+06	5.80273e+06	7.3781e+06	9.09666e+06	1.23079e+07	6.98524e+06	9.61753e+06	1.80958e+07	6.9424e+06	9.63476e+06	1.40757e+07
tyrosine (1)	6.74753e+07	9.68644e+07	1.37604e+08	8.18395e+07	8.53067e+07	1.22466e+08	8.56046e+07	8.49493e+07	7.61292e+07	1.05217e+08	1.11031e+08	1.3407e+08	1.07654e+08	1.41894e+08	1.33859e+08	1.0723e+08	1.22121e+08	1.53276e+08	1.07364e+08	9.12775e+07	1.21329e+08	9.66491e+07	9.58731e+07	151238698	8.61804e+07	9.06007e+07	7.65001e+07	1.07338e+08	1.41015e+08	9.2538e+07	1.15449e+08	1.39457e+08	7.60794e+07	1.14686e+08	1.34207e+08
nicotinamide mononucleotide (1)	893370	1.12522e+06	1.13392e+06	986566	1.11957e+06	1.12156e+06	1.09237e+06	1.2129e+06	740754	693048	1.25337e+06	890129	600790	1.23589e+06	884523	626259	1.08268e+06	845661	845997	641515	781100	587532	553357	954872	614291	512986	469534	754186	901188	447136	674826	981675	398837	717660	1.01182e+06
glutamate (1)	1249726462	2195065201	2957188331	1504222917	2138236692	2882747101	1558047113	2057201242	1905320851	1691423939	2347053131	2474387770	1519830974	2645569612	2466701275	1619194035	2360971493	2623612421	1166869037	1594750170	1215584069	1559670220	1558932867	1366514183	1574005761	1397548240	8.23738e+08	1730001176	2078103944	8.38693e+08	1724232480	2294639896	7.78004e+08	1770083121	2209016763
4-phosphopantothenate (1)	2.87748e+07	4.1726e+07	5.8713e+07	2.17354e+07	4.2249e+07	5.82124e+07	2.27659e+07	4.03328e+07	5.82877e+07	2.50516e+07	4.64245e+07	5.01876e+07	2.17204e+07	4.93844e+07	4.74506e+07	2.37599e+07	5.76374e+07	5.19054e+07	1.22898e+07	1.90768e+07	1.26527e+07	1.89503e+07	2.31833e+07	1.36069e+07	1.92931e+07	2.11221e+07	9.68825e+06	2.41204e+07	3.12528e+07	9.5959e+06	2.37695e+07	3.28208e+07	1.01933e+07	2.47036e+07	3.26742e+07
CDP (1)	1.19756e+06	2.56104e+06	6.58515e+06	1.23246e+06	4.07349e+06	8.0852e+06	1.07056e+06	3.73987e+06	6.83102e+06	1.19941e+06	3.00468e+06	4.91726e+06	1.27116e+06	3.22562e+06	3.57641e+06	1.21314e+06	3.91451e+06	3.87056e+06	1.7709e+06	2.51253e+06	1.80736e+06	2.43435e+06	3.20423e+06	1.85385e+06	2.92079e+06	3.41466e+06	1.57378e+06	2.47424e+06	3.70928e+06	1.53284e+06	2.58172e+06	4.13622e+06	1.61814e+06	2.92333e+06	4.35806e+06
PD (1)	6.40575e+07	1.31102e+08	1.42952e+08	8.81398e+07	1.31881e+08	1.39335e+08	9.43895e+07	1.24713e+08	8.89403e+07	7.69696e+07	137060254	1.47762e+08	7.36155e+07	1.43698e+08	135673983	7.30319e+07	1.20359e+08	150059281	1.06731e+08	2.65266e+08	1.08734e+08	265155721	1.57388e+08	1.22462e+08	2.66599e+08	1.38779e+08	9.18729e+07	3.3021e+08	3.34349e+08	8.92526e+07	3.11384e+08	3.3101e+08	7.98366e+07	3.13669e+08	3.37635e+08
CDP-ethanolamine (1)	2.55125e+07	4.6639e+07	5.34113e+07	3.52683e+07	4.60481e+07	5.15227e+07	3.96093e+07	4.38667e+07	4.45119e+07	3.11246e+07	4.91517e+07	5.09981e+07	3.13806e+07	5.01345e+07	4.64988e+07	3.02468e+07	4.27932e+07	5.07763e+07	5.03151e+07	3.77935e+07	5.24864e+07	3.72925e+07	3.74334e+07	5.88293e+07	3.60987e+07	3.12095e+07	3.65443e+07	3.85534e+07	5.12774e+07	3.49276e+07	3.6539e+07	4.86657e+07	3.07359e+07	3.49796e+07	5.04823e+07
PEEK (1)	376323	1.34529e+06	2.07134e+06	787801	1.47547e+06	2.0492e+06	822353	1.49173e+06	992017	843992	1.76707e+06	2.19717e+06	810039	1.97553e+06	1.95806e+06	799548	1.45316e+06	2.08904e+06	1.38319e+06	2.24137e+06	1.32491e+06	2.15289e+06	1.56336e+06	1.50021e+06	2.32325e+06	1.42228e+06	1.06909e+06	3.39333e+06	3.0844e+06	1.02266e+06	3.24535e+06	2.73477e+06	920355	3.13029e+06	2.83716e+06
DLH (1)	8.71599e+06	2.50034e+07	2.44179e+07	1.32565e+07	2.5686e+07	2.36282e+07	1.39245e+07	2.38405e+07	1.7886e+07	1.81231e+07	2.92276e+07	2.54581e+07	1.7411e+07	2.99576e+07	2.18341e+07	1.70457e+07	2.51055e+07	2.36897e+07	2.74863e+07	6.63862e+07	28932087	6.32501e+07	3.3485e+07	3.29702e+07	6.24173e+07	2.87523e+07	2.64621e+07	8.76852e+07	7.05826e+07	2.64499e+07	8.39096e+07	6.5836e+07	2.22518e+07	7.80888e+07	6.47113e+07
CTP (1)	3.87449e+07	8.6587e+07	1.2047e+08	5.63419e+07	8.17684e+07	1.12861e+08	5.81958e+07	7.72358e+07	1.01111e+08	6.03469e+07	8.57093e+07	9.37972e+07	5.57648e+07	9.21075e+07	9.08892e+07	5.67663e+07	8.35495e+07	1.0381e+08	7.06957e+07	6.94209e+07	7.72488e+07	7.03686e+07	8.25429e+07	8.70972e+07	6.69436e+07	7.71444e+07	5.68521e+07	6.71451e+07	1.02335e+08	5.67781e+07	6.47499e+07	1.05982e+08	5.49729e+07	6.72215e+07	1.04516e+08
L-arginino-succinate (1)	379360	250140	420827	496645	315237	425849	504273	298683	147696	499406	358617	583112	495779	433142	483470	412062	337126	543901	573260	95446.9	618636	153218	132849	732892	108972	86124.5	323067	175710	268537	352354	92418.4	260548	260926	122529	217794
phosphoenolpyruvate (1)	3.11386e+07	2.16632e+07	3.44952e+07	3.19308e+07	2.32467e+07	3.33535e+07	3.15142e+07	2.14797e+07	3.15329e+07	3.04008e+07	2.67842e+07	3.1888e+07	2.74501e+07	2.88777e+07	3.03687e+07	2.90356e+07	3.09873e+07	3.42136e+07	2.67876e+07	1.79369e+07	28309122	1.81e+07	2.48329e+07	3.26088e+07	1.68664e+07	2.38121e+07	1.84508e+07	1.90557e+07	2.77485e+07	1.85111e+07	1.91645e+07	3.15088e+07	1.98514e+07	1.89488e+07	2.80408e+07
IMP (1)	4.29678e+07	4.04833e+07	6.09082e+07	5.90167e+07	4.32828e+07	6.02383e+07	6.35849e+07	4.13135e+07	4.97856e+07	6.82079e+07	6.17857e+07	5.86402e+07	6.09399e+07	6.45362e+07	5.2829e+07	6.61131e+07	6.23414e+07	6.0081e+07	1.32591e+08	4.74258e+07	1.34453e+08	4.89182e+07	4.5492e+07	151453613	4.70994e+07	4.2432e+07	3.84393e+07	4.56637e+07	6.53827e+07	3.72962e+07	4.64411e+07	6.61679e+07	3.50754e+07	4.74566e+07	6.46083e+07
Octulose Bisphosphate (1)	1.93883e+06	2.6142e+06	3.3939e+06	1.62298e+06	2.73216e+06	3.47962e+06	1.92923e+06	2.404e+06	3.74798e+06	2.14956e+06	2.40817e+06	2.86931e+06	1.7144e+06	2.70908e+06	2.67203e+06	1.623e+06	3.1202e+06	2.99971e+06	2.28106e+06	2.46557e+06	2.40017e+06	2.15401e+06	2.29539e+06	2.84853e+06	2.26534e+06	1.72343e+06	1.83648e+06	2.2474e+06	3.29364e+06	1.90571e+06	2.19055e+06	3.2402e+06	1.90858e+06	2.05982e+06	3.01212e+06
malate (1)	4.93062e+08	6.91694e+08	1016942873	4.64526e+08	692134835	9.94353e+08	4.9278e+08	6.59459e+08	9.48171e+08	449272309	6.95642e+08	8.70093e+08	4.02697e+08	7.7848e+08	8.65618e+08	4.2428e+08	7.86073e+08	9.50633e+08	3.14162e+08	3.57019e+08	3.30517e+08	3.65695e+08	3.57471e+08	3.49615e+08	3.44962e+08	328804835	2.47572e+08	3.95697e+08	4.77708e+08	240696310	3.99625e+08	6.00096e+08	2.4694e+08	4.42336e+08	538803037
succinate/Methylmalonic acid (1)	2.57759e+08	2.17252e+08	1.30361e+08	2.51527e+08	1.95974e+08	1.16383e+08	2.43343e+08	2.10633e+08	1.35966e+08	1.8569e+08	2.0112e+08	1.59215e+08	1.74682e+08	2.09386e+08	1.62367e+08	1.71295e+08	2.09397e+08	1.49935e+08	1.43493e+08	2.38315e+08	149714622	2.23554e+08	1.72997e+08	1.75843e+08	2.04315e+08	1.62728e+08	120714161	286428852	2.92908e+08	1.16428e+08	2.67729e+08	3.99216e+08	1.27253e+08	2.72527e+08	3.06665e+08
dGDP/ADP (1)	7.62217e+07	1.22353e+08	2.09112e+08	6.70912e+07	1.86445e+08	2.46647e+08	6.7823e+07	1.56079e+08	2.07638e+08	7.24085e+07	1.51735e+08	1.54969e+08	6.65982e+07	1.41566e+08	1.18133e+08	6.78834e+07	1.69618e+08	1.30363e+08	8.21344e+07	144232612	9.05579e+07	1.35155e+08	1.23757e+08	9.46121e+07	1.36545e+08	1.16213e+08	6.37625e+07	1.3907e+08	144821299	5.87015e+07	1.38381e+08	161551473	6.54083e+07	1.52072e+08	1.55152e+08
LD (1)	509628	877329	1.42902e+06	816551	909478	1.54114e+06	896901	969957	1.25729e+06	954701	1.34781e+06	2.27974e+06	874115	1.46323e+06	2.16398e+06	918611	1.15698e+06	2.32817e+06	1.46539e+06	1.99257e+06	1.5634e+06	2.06957e+06	1.6367e+06	1.87487e+06	2.06335e+06	1.41169e+06	1.24002e+06	3.2297e+06	3.72507e+06	1.24782e+06	3.38287e+06	3.92784e+06	1.14149e+06	3.12651e+06	3.96335e+06
Acetyllysine (1)	1.65924e+06	2.56701e+06	3.97287e+06	1.74151e+06	2.40007e+06	3.77443e+06	2.25849e+06	3.16272e+06	2.81388e+06	1.7864e+06	3.61864e+06	4.45893e+06	1.55935e+06	3.68303e+06	4.18129e+06	1.82131e+06	3.34523e+06	3.97168e+06	7.43919e+06	1.48187e+07	6.33953e+06	1.50114e+07	1.09477e+07	7.30571e+06	1.60855e+07	9.52265e+06	5.26024e+06	2.11476e+07	1.82533e+07	4.96278e+06	2.00606e+07	1.87767e+07	4.40512e+06	1.83812e+07	1.98368e+07
S-adenosyl-L-homocysteine (1)	3.29936e+06	7.74614e+06	1.03607e+07	4.88248e+06	7.75324e+06	9.81386e+06	5.27225e+06	7.22459e+06	8.29772e+06	3.91055e+06	6.15497e+06	7.35129e+06	3.84343e+06	6.49183e+06	6.75357e+06	3.9104e+06	5.38163e+06	7.50531e+06	4.35324e+06	8.87478e+06	4.43898e+06	8.64153e+06	8.63397e+06	4.96452e+06	8.67243e+06	7.83476e+06	2.8201e+06	5.62011e+06	1.01207e+07	2.72156e+06	5.3582e+06	9.72636e+06	2.38092e+06	5.16372e+06	9.90723e+06
ornithine (1)	4.12326e+06	2.79243e+06	3.32594e+06	2.99521e+06	2.1903e+06	3.07329e+06	3.89815e+06	3.48243e+06	3.64424e+06	3.45665e+06	3.41962e+06	3.84957e+06	2.81177e+06	3.19064e+06	4.30016e+06	2.87724e+06	3.22645e+06	3.29226e+06	4.96081e+06	1.79978e+06	4.1032e+06	2.16883e+06	1.69841e+06	4.61811e+06	2.05993e+06	1.35361e+06	1.60277e+06	1.76498e+06	2.76962e+06	1.89067e+06	1.62186e+06	3.61218e+06	1.67055e+06	2.09732e+06	2.97647e+06
dCTP (1)	1.06323e+07	2.62293e+07	3.34534e+07	1.41981e+07	2.5175e+07	3.0839e+07	1.4503e+07	2.41112e+07	2.7914e+07	1.26652e+07	2.65856e+07	2.59182e+07	1.11905e+07	2.83739e+07	2.6098e+07	1.16435e+07	2.67145e+07	2.95098e+07	6.69073e+06	1.97586e+07	7.20337e+06	1.98632e+07	1.42139e+07	8.03374e+06	1.90003e+07	1.35232e+07	5.88622e+06	2.16405e+07	1.93664e+07	5.72187e+06	2.07685e+07	2.00201e+07	5.74657e+06	2.22856e+07	1.99051e+07
GTP (1)	5.78218e+07	1.7226e+08	2.34513e+08	1.02007e+08	1.60839e+08	2.1681e+08	1.04826e+08	1.49228e+08	1.56911e+08	1.33384e+08	1.68161e+08	1.79791e+08	1.26716e+08	182926636	1.81548e+08	1.2712e+08	1.36286e+08	2.06536e+08	1.5753e+08	1.81203e+08	1.77862e+08	1.88794e+08	1.77687e+08	2.01827e+08	1.70863e+08	1.59743e+08	1.25561e+08	174569663	199682041	1.26168e+08	1.70801e+08	2.07723e+08	1.18155e+08	178726469	2.02463e+08
IDP (1)	54542.5	15021.2	16600.6	203971	15021.2	15021.2	128649	19119.6	15021.2	429618	15021.2	40129.8	420489	13225	17930.9	348388	15021.2	8823.95	1.54347e+06	9002.79	1.57942e+06	15021.2	92506.8	1.7065e+06	15021.2	123947	299457	15021.2	100279	305572	15021.2	15021.2	115346	15021.2	125493
GMP (1)	3.45271e+06	1.34802e+07	2.04392e+07	6.63339e+06	1.96317e+07	2.55432e+07	5.97495e+06	1.69285e+07	1.6575e+07	9.22865e+06	1.79632e+07	2.01335e+07	8.75713e+06	1.69048e+07	1.42704e+07	9.39084e+06	1.3735e+07	1.56102e+07	1.11088e+07	1.59119e+07	1.26465e+07	1.38169e+07	1.19954e+07	1.40182e+07	1.42628e+07	9.55745e+06	8.99633e+06	1.72288e+07	1.55119e+07	8.46986e+06	1.69297e+07	1.56682e+07	7.92107e+06	1.51656e+07	1.46795e+07
lysine (1)	1.20836e+07	1.20568e+07	1.81335e+07	9.37855e+06	1.05315e+07	1.65791e+07	1.26443e+07	1.54734e+07	1.94561e+07	1.18631e+07	1.71692e+07	2.36914e+07	9.63669e+06	1.76484e+07	2.48003e+07	9.16654e+06	1.73878e+07	2.11079e+07	6.24845e+06	7.18589e+06	6.06528e+06	7.09387e+06	7.96456e+06	6.61904e+06	7.31473e+06	7.65724e+06	4.79775e+06	1.05467e+07	1.51057e+07	4.7451e+06	1.03213e+07	2.03111e+07	4.1355e+06	1.08255e+07	1.61414e+07
Sedoheptulose bisphosphate (1)	7.04369e+06	6.61271e+06	9.16076e+06	6.0602e+06	6.76014e+06	8.1015e+06	6.7108e+06	6.22461e+06	8.27481e+06	6.05605e+06	7.30716e+06	7.57216e+06	5.69115e+06	7.99395e+06	7.44781e+06	5.85396e+06	8.67565e+06	8.19246e+06	8.4965e+06	4.97431e+06	9.79847e+06	4.77781e+06	6.56672e+06	1.00311e+07	4.94359e+06	6.24173e+06	6.97725e+06	5.75486e+06	9.47612e+06	6.88223e+06	5.50995e+06	8.96823e+06	7.58749e+06	5.66162e+06	9.09613e+06
UDP (1)	1.11639e+07	2.26001e+07	4.57427e+07	9.95804e+06	3.48468e+07	5.53987e+07	1.01322e+07	3.02643e+07	4.56967e+07	9.02018e+06	2.78479e+07	3.70089e+07	9.25292e+06	2.5653e+07	2.53721e+07	9.36786e+06	2.95923e+07	2.9848e+07	9.48428e+06	2.08238e+07	1.07265e+07	1.77711e+07	2.00203e+07	1.06016e+07	1.82492e+07	1.89644e+07	8.95663e+06	1.86807e+07	2.53655e+07	8.07893e+06	1.9358e+07	2.77525e+07	9.6035e+06	2.07482e+07	2.75642e+07
valine (1)	3.36703e+07	4.8707e+07	6.0195e+07	3.869e+07	4.21361e+07	5.54459e+07	4.31344e+07	4.46309e+07	4.75848e+07	4.21124e+07	5.62059e+07	6.93831e+07	4.53998e+07	6.11133e+07	6.91636e+07	4.18273e+07	5.44899e+07	7.35262e+07	4.13906e+07	3.8131e+07	4.42358e+07	4.36461e+07	3.91324e+07	5.70018e+07	3.76135e+07	3.65165e+07	2.7911e+07	4.84652e+07	6.42526e+07	3.40846e+07	5.00935e+07	6.36726e+07	2.66116e+07	4.8062e+07	6.50616e+07
3-phosphoglycerate (1)	1.15625e+08	8.05857e+07	1.14904e+08	1.02587e+08	8.20427e+07	1.13746e+08	104770908	7.49718e+07	1.20062e+08	1.03695e+08	9.76637e+07	1.10629e+08	9.31898e+07	1.10082e+08	1.02089e+08	9.90242e+07	1.16585e+08	1.16002e+08	9.36938e+07	6.31478e+07	1.03901e+08	6.43777e+07	7.82831e+07	1.14028e+08	5.84856e+07	7.53109e+07	6.6379e+07	6.82392e+07	9.90886e+07	6.31631e+07	6.46677e+07	1.07355e+08	6.55753e+07	6.71893e+07	9.94481e+07
threonine/homoserine (1)	2.016e+07	2.44779e+07	2.79651e+07	2.01744e+07	2.03784e+07	2.52547e+07	2.35963e+07	2.57056e+07	2.44637e+07	2.20343e+07	2.61855e+07	3.33913e+07	2.00307e+07	29958250	3.543e+07	1.92881e+07	2.69387e+07	3.11762e+07	2.44242e+07	2.0697e+07	2.36401e+07	2.30001e+07	2.14524e+07	2.8698e+07	2.1497e+07	1.93549e+07	1.58042e+07	2.53639e+07	3.23785e+07	1.73727e+07	2.50346e+07	3.89769e+07	1.56438e+07	2.62059e+07	3.37812e+07
serine (1)	1.80432e+07	1.83637e+07	1.8951e+07	1.52748e+07	1.32811e+07	1.68054e+07	1.91931e+07	2.00734e+07	1.75889e+07	1.65452e+07	19049766	2.23935e+07	1.53402e+07	2.08215e+07	2.63585e+07	1.33833e+07	1.83279e+07	2.08959e+07	2.17862e+07	1.41565e+07	2.02584e+07	1.59605e+07	1.42719e+07	2.45247e+07	1.48754e+07	1.35252e+07	1.33248e+07	1.7379e+07	2.38285e+07	1.4662e+07	1.72162e+07	3.19312e+07	1.23412e+07	1.91789e+07	2.51934e+07
dAMP (1)	86414.3	158636	545022	35607.5	502923	752329	138397	337304	486855	115958	312119	633697	101483	382174	278083	154374	269477	483314	49181.1	186084	61327.2	179939	444675	84800	152367	430845	70830.3	194141	322522	81973.2	202771	357727	36200.1	162257	405116
SID (1)	4.82312e+06	6.81859e+06	9.84244e+06	4.27173e+06	7.38317e+06	9.86408e+06	4.51496e+06	6.52038e+06	8.76922e+06	6.37531e+06	1.00677e+07	1.00338e+07	5.41399e+06	1.07956e+07	8.96264e+06	6.02024e+06	1.11268e+07	1.0035e+07	1.64872e+07	3.57357e+07	1.70768e+07	3.55518e+07	2.45794e+07	1.96512e+07	3.57108e+07	2.35754e+07	1.51463e+07	5.07308e+07	3.51252e+07	1.52194e+07	4.88751e+07	3.80991e+07	1.59934e+07	5.21454e+07	3.60565e+07
SD (1)	2.1004e+06	4.21021e+06	5.53046e+06	3.24992e+06	4.41062e+06	5.38544e+06	3.70229e+06	4.12213e+06	2.9276e+06	4.21827e+06	6.71015e+06	7.95792e+06	4.05505e+06	7.09462e+06	7.03184e+06	4.02601e+06	5.61662e+06	8.22599e+06	7.07563e+06	1.43117e+07	7.29598e+06	1.43941e+07	9.03005e+06	8.30994e+06	1.40295e+07	7.58838e+06	7.45003e+06	2.31542e+07	2.19364e+07	7.20626e+06	2.23768e+07	2.06953e+07	6.35695e+06	2.21053e+07	2.26032e+07
dATP (1)	1.3077e+07	1.73315e+07	2.04286e+07	1.34586e+07	1.67214e+07	1.92673e+07	1.44521e+07	1.6106e+07	1.72084e+07	1.39134e+07	1.90113e+07	1.53394e+07	1.26173e+07	2.0925e+07	1.52792e+07	1.31357e+07	2.16492e+07	1.68847e+07	1.27548e+07	1.77511e+07	1.37491e+07	1.78574e+07	1.51832e+07	15728450	1.7331e+07	1.4338e+07	1.02858e+07	1.83711e+07	1.97325e+07	1.04262e+07	1.75873e+07	2.14623e+07	1.05334e+07	1.97652e+07	2.02124e+07
acetyl-CoA (1)	1.64235e+06	2.49057e+06	3.88325e+06	1.72584e+06	2.02375e+06	3.29272e+06	1.80678e+06	2.09844e+06	3.2489e+06	1.88689e+06	2.28377e+06	2.8541e+06	1.56206e+06	2.77247e+06	2.71354e+06	1.73674e+06	3.03218e+06	3.1502e+06	1.7695e+06	1.34825e+06	1.90167e+06	1.83436e+06	1.86467e+06	2.10169e+06	1.55985e+06	1.54941e+06	1.17624e+06	1.63807e+06	2.19994e+06	1.4251e+06	1.67424e+06	2.30763e+06	1.15304e+06	1.57407e+06	2.31565e+06
dGTP/ATP (1)	9.61525e+08	1445950742	1528315260	1011093782	1339194550	1435618302	1050681649	1337850922	1385014260	1262133981	1385212894	1104107757	1107046398	1536476749	1101906955	1200072420	1677471298	1215727957	1205140308	1501178379	1302046044	1519442238	1227408792	1470279555	1442371785	1184421799	8.29906e+08	1478869754	1424776657	8.29195e+08	1432330510	1647787858	890608171	1589493293	1486908392
arginine (1)	1.82467e+07	2.11922e+07	2.72284e+07	1.53547e+07	1.61866e+07	2.28403e+07	1.97475e+07	2.95176e+07	2.45237e+07	2.07212e+07	1.9807e+07	2.68934e+07	1.72118e+07	2.39155e+07	2.48312e+07	1.80883e+07	2.29953e+07	2.333e+07	1.21562e+07	1.00416e+07	1.5884e+07	1.27897e+07	1.04309e+07	1.84682e+07	1.02284e+07	1.21269e+07	1.0318e+07	11441306	1.76432e+07	1.3039e+07	1.2575e+07	2.3989e+07	9.74935e+06	1.26897e+07	1.71359e+07
dTTP (1)	3.54795e+07	4.86417e+07	4.75843e+07	3.47842e+07	4.4871e+07	4.35814e+07	3.66964e+07	4.52176e+07	4.51045e+07	3.41366e+07	4.91839e+07	3.78699e+07	2.93565e+07	5.5378e+07	3.79647e+07	3.15318e+07	6.18363e+07	4.13278e+07	2.21139e+07	4.07712e+07	2.38072e+07	4.05783e+07	3.20757e+07	2.61423e+07	3.94224e+07	3.0894e+07	1.7548e+07	4.04509e+07	4.08403e+07	1.78062e+07	3.98493e+07	4.52917e+07	1.96025e+07	4.29638e+07	4.27295e+07
UMP (1)	2.99793e+07	5.16302e+07	6.93701e+07	3.33393e+07	7.3375e+07	8.9723e+07	2.96057e+07	6.45118e+07	6.51373e+07	3.5859e+07	6.80269e+07	6.04577e+07	2.99583e+07	6.20573e+07	4.13403e+07	3.63891e+07	6.54279e+07	4.69512e+07	2.82533e+07	4.18969e+07	3.30319e+07	3.76932e+07	3.07724e+07	3.68576e+07	3.77534e+07	2.83982e+07	2.32599e+07	4.58735e+07	4.16153e+07	2.31908e+07	4.37767e+07	4.62358e+07	2.26804e+07	4.45234e+07	4.24468e+07
UDP-D-glucuronate (1)	4.0252e+06	4.13767e+06	5.04808e+06	3.95332e+06	4.34112e+06	4.89581e+06	3.89497e+06	4.00876e+06	5.29075e+06	3.96e+06	5.02558e+06	4.49557e+06	3.67275e+06	5.7171e+06	4.40079e+06	3.71694e+06	6.01879e+06	4.81356e+06	2.92444e+06	2.55597e+06	3.18779e+06	2.62613e+06	2.79694e+06	3.5406e+06	2.84923e+06	2.55325e+06	1.76519e+06	2.7896e+06	3.34519e+06	1.78416e+06	2.75386e+06	4.10544e+06	1.7081e+06	2.78024e+06	3.83237e+06
acetyl-aspartate (1)	1.32285e+06	1.63497e+06	1.82778e+06	518442	1.22318e+06	2.29554e+06	1.553e+06	1.7869e+06	1.38781e+06	870719	1.30168e+06	1.23103e+06	812263	2.37004e+06	1.70568e+06	867840	1.23976e+06	1.94121e+06	4.34532e+06	908370	4.23386e+06	1.22077e+06	2.22887e+06	4.10922e+06	1.96805e+06	955653	2.83279e+06	1.34176e+06	1.68231e+06	2.88824e+06	1.78979e+06	3.26691e+06	2.87706e+06	1.05999e+06	2.08794e+06
NADP+ (1)	3.55262e+07	3.43514e+07	4.05262e+07	2.66131e+07	3.89897e+07	4.07581e+07	2.75941e+07	3.59157e+07	4.52388e+07	2.81798e+07	4.91512e+07	4.2237e+07	2.84078e+07	3.8374e+07	3.06302e+07	2.75973e+07	4.8558e+07	4.52817e+07	9.5232e+06	1.15641e+07	1.07041e+07	1.26337e+07	6.98623e+06	1.08433e+07	1.16956e+07	8.34808e+06	6.61815e+06	1.3726e+07	1.10284e+07	5.99596e+06	1.11756e+07	1.12944e+07	7.32993e+06	1.46183e+07	1.4081e+07
dTMP (1)	461924	501271	963943	482861	1.18158e+06	1.73045e+06	522812	787205	1.12737e+06	309930	1.12762e+06	1.33559e+06	229983	1.02387e+06	1.01677e+06	334410	1.04658e+06	914063	136566	413259	199819	492620	520789	330542	386356	451507	125163	538602	919856	225498	518087	930132	136221	546054	883600
UTP (1)	2.31202e+08	398769406	5.06555e+08	2.70288e+08	3.69484e+08	4.72014e+08	2.89137e+08	3.52143e+08	4.38953e+08	2.88175e+08	3.95907e+08	3.94304e+08	254177241	4.34293e+08	3.91761e+08	2.67053e+08	4.38342e+08	4.40808e+08	2.21475e+08	286064816	2.44228e+08	2.9052e+08	2.85765e+08	2.68974e+08	2.77594e+08	2.77677e+08	1.79096e+08	2.94102e+08	3.60198e+08	1.72054e+08	2.83743e+08	3.80461e+08	1.80151e+08	3.1129e+08	3.75091e+08
creatine (1)	770316	97726.6	125142	772243	134075	239036	729480	212837	111238	1.46479e+06	131257	80020.2	1.07881e+06	146057	156821	1.35984e+06	196351	150495	2.04057e+06	274610	1.76666e+06	147991	368546	1.69489e+06	253562	373676	644132	238469	446495	452077	221751	671425	677241	269017	449920
SDL/DLS (1)	4.83689e+06	6.90824e+06	9.84252e+06	4.34172e+06	7.40912e+06	9.83382e+06	4.52387e+06	6.58341e+06	8.72245e+06	6.38798e+06	1.00957e+07	9.96582e+06	5.25056e+06	1.08439e+07	8.93306e+06	6.10989e+06	1.11293e+07	1.00246e+07	1.62194e+07	3.47073e+07	1.71178e+07	3.47693e+07	2.42742e+07	1.96694e+07	3.56247e+07	2.3505e+07	1.5146e+07	5.04707e+07	3.50366e+07	1.51891e+07	4.85962e+07	3.77358e+07	1.59993e+07	5.19763e+07	3.59751e+07
UDP-N-acetyl-glucosamine (1)	1.53472e+07	2.05877e+07	3.09382e+07	1.43772e+07	2.14952e+07	3.10987e+07	1.52797e+07	2.04165e+07	2.84595e+07	1.46961e+07	2.15006e+07	2.34304e+07	1.30434e+07	2.35833e+07	2.04178e+07	1.37376e+07	2.58714e+07	2.4146e+07	2.64101e+07	2.65388e+07	2.64573e+07	2.48936e+07	29491975	3.04342e+07	2.52085e+07	2.94816e+07	1.8528e+07	2.57511e+07	3.98819e+07	1.80526e+07	2.54401e+07	4.07435e+07	1.93017e+07	2.75787e+07	4.05562e+07
D-gluconate (1)	1.74912e+07	3.9581e+07	5.29245e+07	3.17704e+07	4.02432e+07	5.14538e+07	3.34713e+07	3.88242e+07	2.90489e+07	3.12801e+07	4.34822e+07	4.41233e+07	3.00519e+07	4.53807e+07	4.14091e+07	2.98261e+07	3.29202e+07	4.49656e+07	5.8883e+07	2.74909e+07	6.19906e+07	2.67776e+07	2.79322e+07	7.07089e+07	2.5753e+07	2.39231e+07	2.43779e+07	2.65738e+07	3.61132e+07	2.44859e+07	2.65062e+07	3.50834e+07	2.02081e+07	2.68323e+07	3.6802e+07
Phenol Red (1)	8.83601e+06	1.16674e+07	1.64423e+07	8.86924e+06	9.43177e+06	1.5052e+07	1.04328e+07	1.1309e+07	1.41024e+07	1.04914e+07	9.81022e+06	1.25562e+07	1.15784e+07	1.46339e+07	1.46562e+07	1.13368e+07	16532286	1.50107e+07	2.42005e+07	4.15556e+07	2.64518e+07	4.48955e+07	5.61896e+07	3.17616e+07	3.9754e+07	5.32939e+07	2.10303e+07	4.58239e+07	7.71521e+07	2.53679e+07	4.83681e+07	7.92753e+07	2.26435e+07	4.94498e+07	7.79978e+07
taurine (1)	1.40138e+06	2.52024e+06	726208	1.05534e+06	1.77747e+06	978042	1.85359e+06	2.35218e+06	1.08654e+06	1.71193e+06	1.82411e+06	1.08867e+06	1.4769e+06	963227	1.72764e+06	1.25327e+06	975923	913314	2.47793e+06	1.58149e+06	1.8888e+06	994252	881330	3.29853e+06	1.58257e+06	965183	568742	2.9473e+06	1.26684e+06	858742	1.18295e+06	2.14412e+06	617018	7.06718e+06	1.71702e+06
tryptophan (1)	1.35278e+07	1.95603e+07	3.20311e+07	2.22528e+07	1.51316e+07	2.68045e+07	2.31494e+07	1.75653e+07	2.14329e+07	2.60157e+07	1.81196e+07	2.40053e+07	2.17216e+07	3.285e+07	3.21359e+07	2.5558e+07	2.86638e+07	2.91443e+07	2.63215e+07	1.91359e+07	3.00349e+07	1.72592e+07	2.42324e+07	3.64645e+07	1.85813e+07	2.43176e+07	1.56439e+07	2.16987e+07	3.51753e+07	2.17212e+07	2.64436e+07	3.71642e+07	1.85961e+07	2.50748e+07	3.13477e+07
UDP-D-glucose (1)	3.11163e+07	3.08055e+07	4.25949e+07	2.92297e+07	3.24938e+07	4.22379e+07	2.94476e+07	3.10855e+07	3.88662e+07	2.72037e+07	3.01648e+07	3.15391e+07	2.34721e+07	3.34111e+07	2.8254e+07	2.63713e+07	3.58465e+07	3.28723e+07	7.48984e+07	3.55347e+07	7.71147e+07	3.43773e+07	3.33536e+07	8.93104e+07	3.45863e+07	3.17599e+07	6.25277e+07	3.29258e+07	3.96109e+07	6.1448e+07	3.25758e+07	3.99194e+07	6.51008e+07	3.48353e+07	4.0523e+07
dCMP (1)	1.03377e+06	1.61086e+06	1.38345e+06	840072	1.85453e+06	1.50371e+06	999811	1.77932e+06	1.45373e+06	830871	2.05702e+06	1.36029e+06	659246	1.7844e+06	995753	676367	1.95355e+06	1.04776e+06	304745	1.16765e+06	191657	897455	588898	390638	1.07498e+06	529103	251063	1.38557e+06	919663	103994	1.45643e+06	970545	238167	1.43083e+06	918589
CDP-choline (1)	488885	918088	989577	672086	900910	1.011e+06	730743	828882	859580	640275	1.03527e+06	1.06811e+06	637232	1.1114e+06	876901	636561	996257	1.03575e+06	855555	882855	806323	847862	747304	1.03019e+06	821270	697414	641199	859487	1.15191e+06	575150	885814	1.0111e+06	532790	838860	1.10153e+06
nicotinate (1)	1.90354e+06	3.28084e+06	7.21629e+06	1.576e+06	3.11845e+06	6.7164e+06	1.8191e+06	2.832e+06	7.05417e+06	1.80545e+06	3.26582e+06	5.61245e+06	1.24659e+06	3.72519e+06	5.46181e+06	1.82633e+06	3.97106e+06	5.97971e+06	950106	1.95483e+06	1.18196e+06	1.92207e+06	3.56315e+06	1.21263e+06	1.80945e+06	3.43813e+06	961173	1.69137e+06	3.59439e+06	727002	1.6984e+06	4.38314e+06	795714	1.67442e+06	3.67043e+06
GDP (1)	3.99162e+06	8.64263e+06	1.84868e+07	3.81906e+06	1.33733e+07	2.2571e+07	3.59974e+06	1.09218e+07	1.76495e+07	4.32115e+06	1.04637e+07	1.52272e+07	4.45443e+06	9.69959e+06	1.06235e+07	4.42694e+06	1.09583e+07	1.25258e+07	6.01458e+06	1.0542e+07	6.95958e+06	9.29214e+06	1.08907e+07	7.30204e+06	9.50405e+06	1.02525e+07	5.03402e+06	9.46338e+06	1.17291e+07	4.80049e+06	9.73305e+06	1.36066e+07	5.43648e+06	1.03053e+07	1.32122e+07
dTDP (1)	2.65906e+06	3.9479e+06	6.39506e+06	1.98936e+06	6.02823e+06	7.65636e+06	2.39049e+06	5.42557e+06	6.21713e+06	1.92665e+06	5.26282e+06	5.38802e+06	1.7951e+06	4.77153e+06	3.32761e+06	1.6216e+06	5.5835e+06	3.99401e+06	1.71124e+06	3.93915e+06	1.87876e+06	3.36492e+06	3.21707e+06	1.802e+06	3.6599e+06	3.01349e+06	1.446e+06	4.03289e+06	4.14276e+06	1.45759e+06	3.57541e+06	4.78767e+06	1.41275e+06	4.1675e+06	4.72241e+06
ADP-D-glucose (1)	1.70046e+06	1.4828e+06	2.35666e+06	1.6721e+06	1.55121e+06	2.19752e+06	1.60972e+06	1.57892e+06	2.16673e+06	1.74367e+06	1.88638e+06	1.97495e+06	1.6426e+06	2.12027e+06	1.78151e+06	1.89217e+06	2.47093e+06	1.86214e+06	2.87264e+06	1.24321e+06	2.70436e+06	1.23991e+06	1.46223e+06	3.40213e+06	1.22178e+06	1.39063e+06	1.09922e+06	1.16163e+06	1.81434e+06	943585	1.33013e+06	1.80102e+06	1.17436e+06	1.53008e+06	1.81072e+06
Cystine (1)	273546	836192	1.20234e+06	199535	350611	655564	322950	397388	635929	2.21544e+06	341329	549017	2.01749e+06	1.15986e+06	966060	1.83749e+06	1.18473e+06	1.04655e+06	281517	1.14147e+06	1.42115e+06	2.35893e+06	1.9716e+06	2.07868e+06	741451	2.50841e+06	2.09067e+06	765558	1.12163e+06	3.72645e+06	1.32795e+06	1.87901e+06	2.1213e+06	1.48563e+06	615172
Pyroglutamic acid (1)	1.98174e+08	2.84071e+08	2.52223e+08	1.90709e+08	2.62454e+08	2.81786e+08	1.95661e+08	2.69509e+08	247868060	2.33537e+08	3.38341e+08	2.8597e+08	2.52683e+08	3.23108e+08	2.98753e+08	2.37349e+08	3.25564e+08	2.9304e+08	1.91083e+08	2.29359e+08	2.36659e+08	2.72716e+08	1.78413e+08	2.84189e+08	2.21579e+08	1.74791e+08	122959702	2.36235e+08	2.1911e+08	1.9819e+08	247959116	268600606	152879327	2.54765e+08	2.39268e+08
N-carbamoyl-L-aspartate (1)	2.02368e+07	2.86544e+07	4.62902e+07	1.9164e+07	2.92129e+07	4.74514e+07	2.06127e+07	2.86399e+07	4.11952e+07	2.48987e+07	3.33684e+07	4.80615e+07	2.18266e+07	3.75174e+07	4.48027e+07	2.32962e+07	3.90857e+07	5.24842e+07	9.73996e+06	2.03865e+07	9.76619e+06	2.03755e+07	1.7528e+07	1.16029e+07	2.05139e+07	1.74301e+07	8.00594e+06	2.60898e+07	3.49113e+07	7.74345e+06	2.59363e+07	3.44525e+07	8.50236e+06	2.89061e+07	3.98451e+07
inosine (1)	761160	3.20603e+06	3.23735e+06	1.33948e+06	3.12903e+06	3.11561e+06	1.4002e+06	2.98825e+06	2.59685e+06	1.4092e+06	4.65013e+06	3.60011e+06	1.47411e+06	4.78884e+06	3.26045e+06	1.31278e+06	3.87061e+06	3.6004e+06	3.25984e+06	5.00633e+06	3.24359e+06	4.85356e+06	2.43714e+06	3.66558e+06	4.85295e+06	1.93479e+06	1.13524e+06	4.72094e+06	3.42402e+06	1.12796e+06	4.55936e+06	3.16081e+06	897520	3.82127e+06	3.30966e+06
glutathione disulfide (1)	2.59242e+07	1.03742e+08	1.24054e+08	5.47282e+07	1.08189e+08	1.31879e+08	7.34803e+07	1.16501e+08	1.34895e+08	6.1435e+07	1.25624e+08	1.52507e+08	9.63377e+07	1.00698e+08	1.19153e+08	7.39925e+07	6.67915e+07	1.59034e+08	8.16466e+07	7.72655e+07	7.64351e+07	7.56301e+07	5.12448e+07	1.05472e+08	7.59184e+07	5.35396e+07	4.43445e+07	7.65707e+07	9.21098e+07	4.34167e+07	5.60627e+07	7.9195e+07	3.10713e+07	7.49306e+07	1.04925e+08
N-Acetyl-L-alanine (1)	7.88832e+06	1.45318e+07	1.82755e+07	9.24665e+06	1.27859e+07	1.73225e+07	9.3739e+06	1.28838e+07	1.56646e+07	1.03771e+07	1.5677e+07	1.47435e+07	7.10179e+06	1.82184e+07	1.51782e+07	9.50445e+06	1.79865e+07	1.66567e+07	4.20074e+06	1.03946e+07	5.45647e+06	1.05709e+07	8.29681e+06	5.51489e+06	1.06392e+07	7.87258e+06	3.17422e+06	1.13924e+07	9.72309e+06	2.65536e+06	1.11815e+07	2.09435e+07	4.596e+06	1.41119e+07	1.11521e+07
histidine (1)	7.1937e+06	8.50203e+06	9.71762e+06	6.75881e+06	8.20754e+06	9.64969e+06	9.00384e+06	9.55608e+06	8.75798e+06	8.25622e+06	1.08152e+07	1.38676e+07	6.929e+06	1.27347e+07	1.27666e+07	5.79568e+06	9.40954e+06	1.24635e+07	1.45178e+07	9.81993e+06	1.34423e+07	1.08628e+07	6.96163e+06	1.53472e+07	1.11035e+07	7.66939e+06	1.09045e+07	1.46504e+07	1.58905e+07	1.00024e+07	1.38219e+07	1.76327e+07	9.7075e+06	1.47093e+07	1.64087e+07
N-acetyl-glucosamine (1)	248029	177119	228615	318772	157701	234923	375855	154289	20839	745863	127915	176303	591842	67042.8	191980	637059	103884	215381	989606	164214	958565	235213	318314	999741	202338	272567	352886	183356	429007	407100	224145	431614	284534	230943	441570
myo-inositol (1)	449359	4.8334e+06	1.23735e+07	1.65598e+06	1.11786e+06	6.40819e+06	2.14758e+06	3.13809e+06	7.24312e+06	1.67284e+06	2.97503e+06	8.39373e+06	1.13018e+06	6.02852e+06	1.25206e+07	1.35431e+06	4.6838e+06	1.29492e+07	1.9925e+06	1.66279e+06	1.34787e+06	1.6653e+06	6.02649e+06	1.87086e+06	1.16561e+06	7.24822e+06	2.20784e+06	1.7547e+06	9.24547e+06	456475	833539	8.18307e+06	61069.2	1.2143e+06	7.21693e+06
sn-glycerol-3-phosphate (1)	2.89961e+08	5.68871e+08	3.56616e+08	495816673	5.59433e+08	3.40375e+08	5.21114e+08	5.28038e+08	3.3372e+08	3.96184e+08	641763668	420301441	4.06103e+08	6.14039e+08	3.77448e+08	3.66388e+08	4.98481e+08	4.15802e+08	6.06464e+08	4.78358e+08	6.36329e+08	4.81461e+08	1.54611e+08	7.37897e+08	4.65105e+08	1.16919e+08	5.06588e+08	5.4697e+08	2.20171e+08	4.68478e+08	5.08731e+08	2.20913e+08	4.31841e+08	4.31632e+08	2.14746e+08
a-ketoglutarate (1)	1.09253e+08	1.75979e+08	1.52759e+08	1.17608e+08	2.40924e+08	1.77916e+08	1.11948e+08	1.72826e+08	1.75313e+08	130171376	2.46379e+08	2.27089e+08	1.582e+08	1.69729e+08	1.36679e+08	1.2078e+08	1.69486e+08	2.44714e+08	7.50671e+07	1.19844e+08	9.4704e+07	1.5344e+08	9.54999e+07	1.10903e+08	1.13587e+08	7.96257e+07	6.82797e+07	1.50252e+08	1.27488e+08	5.36323e+07	1.06984e+08	1.47069e+08	4.77109e+07	1.14342e+08	1.22506e+08
dCDP (1)	264821	942567	2.22592e+06	198233	1.73561e+06	2.74555e+06	391408	1.38177e+06	1.97254e+06	216909	1.42288e+06	1.74599e+06	244392	1.18939e+06	1.11022e+06	309786	1.33043e+06	1.59015e+06	76431.5	824555	109241	691264	466744	171775	965993	422210	75086.3	861252	907495	72930.5	836351	991176	64283.1	1.01378e+06	1.11817e+06
trehalose/sucrose (1)	156151	547776	565300	585229	370951	541342	1.0981e+06	2.86772e+06	491736	433716	439451	406275	349040	791496	1.16679e+06	566985	548332	712477	116919	569280	55480.2	286092	726327	104448	386168	807681	124417	219879	558670	747632	548802	1.18128e+06	76334.5	433557	369525
lactate (1)	8.52753e+08	1286884323	1749527236	7.22538e+08	6.74247e+08	1409095585	9.67865e+08	914846321	1691634069	754800946	1260616177	1448159759	7.01118e+08	1274854072	2070078170	832115312	1456969975	2183665011	9.2784e+08	9.33644e+08	7.4465e+08	1084221137	1410101055	6.83974e+08	8.33205e+08	1531207604	2.6221e+08	4.44155e+08	1566541225	5.12955e+08	6.9052e+08	2448639848	3.9054e+08	856372592	1611347821
VD (1)	9.32655e+06	1.11551e+07	9.64686e+06	8.39392e+06	9.06424e+06	7.39866e+06	1.13506e+07	1.42809e+07	1.37078e+07	6.56226e+06	1.27102e+07	2.07091e+07	6.3268e+06	1.13519e+07	2.14915e+07	4.64905e+06	1.11882e+07	1.66004e+07	2.08279e+07	4.11893e+07	1.687e+07	3.9355e+07	2.31635e+07	1.83473e+07	4.49993e+07	1.80627e+07	1.78225e+07	7.05669e+07	5.79078e+07	1.6246e+07	6.54488e+07	7.91529e+07	13872684	5.61543e+07	6.11379e+07
thiamine (1)	1.47275e+06	4.00763e+06	4.72765e+06	2.69836e+06	3.73112e+06	4.11583e+06	3.87226e+06	5.36929e+06	1.6378e+06	2.23431e+06	4.10251e+06	5.09498e+06	2.23724e+06	3.89487e+06	5.14981e+06	1.87908e+06	2.31364e+06	4.19841e+06	1.77582e+06	1.60842e+06	1.63889e+06	1.61502e+06	1.61448e+06	1.94253e+06	1.6969e+06	1.23395e+06	695575	1.64683e+06	3.44601e+06	818767	1.55012e+06	2.76397e+06	396774	1.65009e+06	3.7373e+06
pyridoxine (1)	1.26698e+06	3.97111e+06	4.95218e+06	2.87536e+06	2.71585e+06	3.74729e+06	2.80454e+06	2.54177e+06	1.40468e+06	4.54769e+06	3.90639e+06	4.07566e+06	6.77678e+06	5.52099e+06	4.0514e+06	5.53108e+06	3.07229e+06	5.94707e+06	6.00366e+06	4.94391e+06	8.54812e+06	5.64454e+06	4.61982e+06	1.169e+07	3.99812e+06	3.9042e+06	4.6584e+06	4.79141e+06	6.1419e+06	7.20774e+06	5.62866e+06	3.92799e+06	3.51535e+06	4.49612e+06	4.33403e+06
citrulline (1)	677631	178508	70805.5	610546	170448	135073	1.32115e+06	352652	123454	734212	500995	175198	525999	187489	385484	428138	231155	114768	1.09451e+06	278942	852150	511381	209457	857158	448786	217864	200593	247635	378459	284060	185827	526121	259614	244534	545754
orotate (1)	1.11084e+06	2.92577e+06	4.72798e+06	1.71094e+06	2.7639e+06	4.11043e+06	2.01493e+06	2.50254e+06	5.81526e+06	1.49864e+06	4.65441e+06	9.02445e+06	1.95011e+06	4.69865e+06	7.20907e+06	1.37502e+06	3.28815e+06	8.71681e+06	1.41479e+06	1.72198e+06	1.58948e+06	2.12806e+06	2.31302e+06	1.44225e+06	2.07052e+06	1.43864e+06	1.094e+06	3.50854e+06	5.55786e+06	839053	3.25095e+06	6.10044e+06	926440	1.98655e+06	5.82002e+06
NADPH (1)	1.28623e+07	1.78014e+07	3.50012e+07	2.3448e+07	1.15243e+07	3.43593e+07	2.4572e+07	9.59391e+06	1.02746e+07	2.02446e+07	1.18649e+07	1.45189e+07	6.67868e+06	4.63458e+07	3.69394e+07	1.8009e+07	3.83662e+07	1.26738e+07	5.77367e+06	5.67967e+06	4.1891e+06	3.3489e+06	1.34273e+07	7.10576e+06	5.34823e+06	8.92143e+06	4.05798e+06	6.63622e+06	1.59782e+07	5.79709e+06	1.19769e+07	2.06165e+07	3.20609e+06	4.71423e+06	9.22863e+06
Phenylacetyl-CoA (1)	2449.17	7758.99	2449.17	6438.68	7138.6	2449.17	6319.72	2449.17	2443.58	2449.17	4383.88	2449.17	8048.51	2449.17	2449.17	2449.17	2449.17	2449.17	77584.5	2449.17	80343.5	2449.17	2449.17	34423.7	2449.17	2449.17	2449.17	2449.17	2449.17	2449.17	2449.17	2449.17	2449.17	2449.17	2449.17
4-aminobutyrate (1)	4.59951e+06	1.60763e+07	1.55896e+07	7.16481e+06	1.23096e+07	1.42402e+07	7.89041e+06	1.34692e+07	7.7554e+06	9.16565e+06	1.30781e+07	1.39382e+07	8.49745e+06	1.68199e+07	1.40729e+07	8.14075e+06	1.25858e+07	1.4692e+07	6.61213e+06	9.45995e+06	6.8055e+06	9.56616e+06	1.01109e+07	8.14156e+06	8.13284e+06	6.05136e+06	3.94406e+06	9753961	1.32993e+07	3.75793e+06	9.86923e+06	3.20712e+07	3208811	8.19676e+06	1.23844e+07
aconitate (1)	2.94266e+06	4.72045e+06	3.50682e+06	2.51494e+06	4.05324e+06	3.28552e+06	2.84257e+06	3.92737e+06	2.83214e+06	3.85099e+06	5.37659e+06	2.45787e+06	3.31657e+06	6.37087e+06	2.16595e+06	3.91274e+06	6.91924e+06	3.30569e+06	1.63461e+06	2.43305e+06	3.01595e+06	3.17932e+06	1.4551e+06	4.4289e+06	1.52807e+06	1.26409e+06	1.84427e+06	3.56181e+06	2.6381e+06	2.90629e+06	4.15252e+06	4.32103e+06	2.32472e+06	4.64375e+06	2.04558e+06
2-dehydro-D-gluconate (1)	143037	377773	344157	511828	295635	194290	607927	449976	36480.4	602525	402616	320003	705933	384964	482225	555720	85701.1	339561	1.43902e+06	360649	1.50596e+06	431122	201306	1.71657e+06	301354	189750	353817	256599	437235	327241	284482	392831	220297	265282	427365
ribulose-5-phosphate (1)	2.39737e+07	4.92311e+07	3.66169e+07	4.09613e+07	4.3231e+07	3.57274e+07	6.54013e+07	5.96605e+07	6.1794e+07	2.20582e+07	5.80949e+07	9.71384e+07	3.42896e+07	3.97434e+07	6.2457e+07	1.97055e+07	3.12705e+07	6.32727e+07	2.8516e+07	2.76099e+07	2.57138e+07	3.28211e+07	2.41739e+07	3.15207e+07	2.97128e+07	2.07686e+07	2.45375e+07	3.16841e+07	4.93458e+07	2.30093e+07	2.71511e+07	3.74584e+07	1.76433e+07	2.39085e+07	4.84498e+07
Cellobiose (1)	175016	602077	620632	649056	431736	436100	1.15084e+06	2.73379e+06	362731	473313	492033	441888	7741.43	859584	1.21817e+06	596566	378848	750087	185007	631750	55165.3	116956	789077	55165.3	447490	730828	192504	276710	620383	805845	556297	875245	55165.3	209819	437613
5-phosphoribosyl-1-pyrophosphate (1)	6.3997e+07	4.5669e+07	1.3396e+08	7.09724e+07	4.95502e+07	1.34024e+08	5.20975e+07	3.09993e+07	8.36578e+07	5.67214e+07	6.61828e+07	7.49849e+07	3.99479e+07	8.47262e+07	9.51574e+07	5.52157e+07	9.20424e+07	1.09925e+08	6.1766e+06	1.40249e+07	1.06333e+07	1.26765e+07	3.23527e+07	1.02637e+07	1.20682e+07	3.12278e+07	1.21115e+07	2.14567e+07	5.75901e+07	1.2321e+07	2.48778e+07	7.94055e+07	1.67441e+07	2.94487e+07	6.42398e+07
VDPVNF (1)	359613	765236	1.30972e+06	448970	846428	1.30739e+06	493008	725366	1.10363e+06	652166	1.18751e+06	1.45798e+06	609103	1.17952e+06	1.24695e+06	561924	1.14878e+06	1.3824e+06	670522	796691	734551	858820	692821	879269	830378	600866	676307	1.32689e+06	1.31156e+06	690991	1.29536e+06	1.2934e+06	626813	1.30577e+06	1.30541e+06

## Sheet: median normalized counts
	NF54 +aTc bio 1			NF54 +aTc bio 2			NF54 +aTc bio 3			NF54 No aTc bio 1			NF54 No aTc bio 2			NF54 No aTc bio 3			Dd2 +aTc bio 1			Dd2 +aTc bio 2			Dd2 +aTc bio 3			Dd2 No aTc bio 1			Dd2 No aTc bio 2			Dd2 No aTc bio 3
arginine	1.71616	1.54194	1.69357	1.31823	1.21877	2.06694	1.43677	1.25213	1.4251	1.66281	1.61384	1.59554	1.15714	1.31271	1.27848	1.41473	1.6242	1.40064	1.0803	1.256	1.35726	0.677631	0.801334	0.687609		0.730868	0.896747	1.065	1.53946	1.10273	0.612465	0.701102	0.669685	0.891121	1	0.842239
asparagine	6.55361	5.96862	6.35145	4.52695	3.99256	5.72511	4.23325	3.73065	4.71664	5.16459	5.02042	4.27073	4.15371	4.42114	4.09804	4.74551	6.73736	4.66148	6.48966	5.25018	5.75818	3.41071	3.51757	3.72717		3.83624	3.937	4.70192	5.74686	4.9831	3.28269	3.41271	3.88344	4.44665	5.42562	4.76954
aspartate	21.607	31.1057	27.4461	30.3432	37.2183	32.1545	33.8422	34.8868	22.7771	28.4013	33.2681	30.3328	33.3156	33.0429	27.6054	34.1133	39.6166	41.6395	36.0664	35.8039	38.121	39.2517	36.8431	38.3116		40.7311	36.8335	35.3093	40.9393	34.0006	39.7707	40.3537	38.1758	48.8019	41.9962	49.7263
glutamate	117.541	151.056	133.62	136.54	160.998	144.053	156.044	158.036	110.72	135.732	142.505	142.827	137.117	145.214	131.264	130.165	161.346	157.511	103.697	96.1198	100.428	107.618	97.7205	105.813		109.231	103.344	85.0244	99.0209	87.9983	92.6088	96.1322	93.4139	104.961	95.6539	108.574
glutamine	24.1531	23.1174	23.163	18.398	15.2312	19.1531	16.379	13.9624	16.3995	25.4773	26.9984	23.7651	16.8407	19.2615	18.2294	16.5297	23.1956	18.7526	22.9534	22.6786	26.9586	14.7837	16.0901	14.6712		16.2945	17.9743	18.3523	26.7037	21.5599	12.4037	13.3337	14.542	15.9635	16.7498	15.0102
histidine	0.67659	0.678728	0.772179	0.528855	0.617985	0.669153	0.512775	0.529007	0.508936	0.662536	0.649686	0.511228	0.631834	0.699005	0.523146	0.729504	0.83506	0.748258	1.29017	1.06292	1.12789	0.662672	0.680602	0.746434		0.487786	0.567128	1.12554	1.18094	1.09799	0.784249	0.770619	0.776262	0.802598	0.735033	0.806494
isoleucine	15.7926	20.3669	17.9791	16.737	15.6695	14.7956	19.696	16.9579	12.607	23.3796	29.8852	27.9795	17.4179	20.9444	17.9372	18.5049	23.4808	25.6523	25.7558	26.617	32.4932	17.1756	18.6404	15.6704		18.539	19.3872	21.972	34.2244	25.1368	17.1189	18.996	18.6271	19.9037	16.5431	18.5704
lysine	1.1365	0.941806	1.08439	0.74997	0.792964	1.08351	0.956859	0.908883	1.13062	0.951973	0.903568	0.808567	1.00304	0.968715	0.966714	1.24629	1.62218	1.26723	0.555287	0.4796	0.486447	0.484921	0.444463	0.491735		0.558059	0.566229	0.495213	0.560233	0.467757	0.564578	0.575451	0.571304	0.762955	0.846683	0.793358
methionine	1.68288	2.09785	1.84036	1.63063	1.36667	1.3319	1.78622	1.50386	1.11127	2.83054	3.56338	3.28754	1.71513	2.34303	2.02136	1.86512	2.54391	2.76233	3.32965	3.48741	4.28744	1.68491	1.84999	1.5367		1.75706	1.85252	2.70755	4.27026	3.21891	1.68809	1.94118	1.87388	1.9796	1.59129	1.72315
proline	1.14186	1.15058	1	1.04071	1.00097	0.971896	1.04188	1	1.01294	1.28241	1.49515	1.39727	1	1.19626	1.08899	1.0532	1.4007	1.3413	1.42986	1.42545	1.61846	0.976986	1.00226	0.943068		1.15733	1.22048	1.16638	1.64498	1.42804	0.868539	1	0.926554	1.11189	1.16329	1.07331
serine	1.69702	1.53391	1.64602	1.14229	1	1.40562	1	0.921293	1.02211	1.3277	1.43835	1.18052	1.1129	1.14288	1.01898	1.17801	1.7241	1.2545	1.93609	1.60189	1.80237	0.955315	1	1		1	1.00015	1.37535	1.73107	1.39588	0.930318	0.959866	1.01214	1.20353	1.33108	1.23827
tryptophan	1.27233	2.23465	1.98532	1.21671	1.13933	1.22999	1.6902	1.46945	1.24549	2.08768	2.03669	2.25443	1.05856	1.80312	1.59363	1.2628	2.102	1.7497	2.33914	2.37495	2.67985	1.29134	1.08137	1.24913		1.69791	1.79821	1.61472	2.56453	2.10336	1.16156	1.47433	1.32329	1.77663	1.54922	1.54076
tyrosine	6.34627	8.21843	7.34154	6.02529	6.42315	5.94848	7.26103	6.71374	4.42395	8.44336	10.094	9.45862	6.4865	7.78851	6.7896	7.05278	8.75567	9.20208	9.54122	9.59384	11.1148	6.15962	6.05551	5.7935		6.71762	6.69965	7.89617	10.9256	8.60516	5.74593	6.43671	6.05239	7.12238	5.81337	6.59634
valine	3.1668	3.8853	3.69926	3.02974	3.17263	3.12522	3.17635	3.03961	2.76521	3.37939	4.25684	3.68953	3.2836	3.35448	3.02949	3.6499	4.52397	4.4142	3.6783	3.49785	4.18918	2.57317	2.73463	2.52858		2.74192	2.70028	2.88091	4.02422	3.00997	2.59439	2.79289	2.53641	3.24527	2.65424	3.19781
PE	1.19283	1.80832	1.67676	1.53105	1.85988	1.6983	1.71571	1.67077	1.18588	1.62018	1.7142	1.66405	1.92825	1.94114	1.6367	2.18542	2.54036	2.56779	10.7669	9.72536	10.1585	21.5539	20.1188	22.1399		11.1006	10.488	12.0209	13.257	11.972	23.975	23.9969	23.1525	18.9822	16.6107	19.382
PD	6.02482	8.85112	8.09496	8.155	9.92998	8.73291	7.54324	7.63849	5.16842	6.17657	6.90244	6.44204	8.00718	7.88753	6.69164	7.77302	8.87439	9.00893	9.48494	8.59793	9.00001	17.9008	16.6132	17.9222		11.0279	10.2623	9.48292	10.5377	9.03013	17.6765	17.3608	16.5535	16.8873	13.7984	16.5949
PEEK	0.035394	0.079112	0.070526	0.083681	0.111095	0.104457	0.109299	0.11234	0.057647	0.067728	0.075952	0.070527	0.103234	0.108436	0.080792	0.115582	0.128076	0.125417	0.122921	0.104764	0.110254	0.151253	0.134889	0.156181		0.109542	0.105173	0.110349	0.120741	0.104099	0.181649	0.18094	0.165197	0.155787	0.114001	0.139448
DLH	0.819767	1.33123	1.19418	1.5553	1.93402	1.66941	1.28847	1.29532	1.03938	1.45432	1.63251	1.50358	1.7075	1.64436	1.3958	1.33922	1.42816	1.42223	2.44265	2.28775	2.42304	4.47989	3.96291	4.19602		2.34622	2.12614	2.73135	3.12283	2.51685	4.69388	4.67826	4.12104	3.56498	2.74443	3.1806
SD	0.197549	0.326361	0.317512	0.261889	0.332097	0.288647	0.291829	0.295236	0.170126	0.338503	0.380215	0.355128	0.392013	0.389421	0.312269	0.418627	0.45995	0.493854	0.628797	0.576915	0.610714	0.965786	0.901854	0.943135		0.632716	0.561138	0.768976	0.850812	0.719019	1.23947	1.24758	1.16658	1.10796	0.8627	1.11096
SID	0.453629	0.428973	0.387208	0.424139	0.555914	0.456582	0.519362	0.540761	0.509589	0.511598	0.507634	0.531037	0.588165	0.592568	0.618621	0.527829	0.586244	0.602461	1.46518	1.35031	1.44421	2.41153	2.22749	2.40067		1.72223	1.74333	1.56337	1.79689	1.80898	2.71568	2.72496	2.75191	1.7741	1.58819	1.7722
VD	0.877192	0.842929	0.973437	0.693882	0.68249	1	0.509041	0.405603	0.796577	0.526601	0.593222	0.410086	0.742542	0.623099	0.622032	1.08941	1.40575	0.996617	1.85093	1.33396	1.34838	2.77955	2.46577	3.02509		1.62302	1.33568	1.8396	1.9181	1.56911	3.77752	3.64901	2.96347	2.92481	3.29955	3.00496
LD	0.047932	0.081999	0.076919	0.054573	0.068479	0.06792	0.075406	0.084487	0.073062	0.076612	0.08196	0.081029	0.07874	0.080316	0.064325	0.119926	0.141545	0.139774	0.130226	0.123622	0.137788	0.134463	0.129668	0.13871		0.11468	0.104391	0.127992	0.147325	0.129111	0.172889	0.188607	0.164998	0.188146	0.163735	0.1948
SDL/DLS	0.454925	0.436001	0.387973	0.429716	0.557868	0.460995	0.519366	0.539102	0.506871	0.512616	0.49231	0.538945	0.589801	0.595217	0.618758	0.524253	0.584309	0.601837	1.44138	1.35355	1.44555	2.34213	2.17846	2.39488		1.70084	1.73812	1.56333	1.79331	1.80964	2.70175	2.70941	2.74299	1.76963	1.57305	1.76819
VDPVNF	0.033823	0.045086	0.042281	0.0476	0.063732	0.050793	0.06911	0.071672	0.064133	0.052334	0.057112	0.049567	0.069375	0.064744	0.063869	0.076697	0.081563	0.082994	0.059588	0.058083	0.064619	0.053763	0.053809	0.055822		0.048544	0.044432	0.069807	0.081582	0.070897	0.07103	0.072221	0.06891	0.066244	0.053916	0.064162
2-dehydro-D-gluconate	0.013453	0.051398	0.052137	0.023499	0.02226	0.031509	0.01816	0.010651	0.00212	0.048351	0.066191	0.049019	0.023521	0.021131	0.004765	0.016834	0.031542	0.020386	0.127883	0.119081	0.126154	0.024337	0.027012	0.020259		0.014105	0.014031	0.03652	0.038636	0.024917	0.013736	0.015861	0.014	0.022084	0.016375	0.021005
2_3-Diphosphoglyceric acid	80.41	91.0135	73.74	41.4164	49.6928	42.2672	45.2673	46.1615	43.6187	85.2318	86.7377	89.0301	48.7375	48.7446	52.3023	40.3081	47.8239	48.6958	76.6266	74.4881	75.6571	40.3888	37.3237	37.7864		46.2556	46.0912	69.1425	76.8865	79.7539	34.1244	35.2744	35.5934	38.655	37.0864	39.339
3-phosphoglycerate	10.8749	10.3019	8.98527	5.0127	6.17739	5.24981	6.06319	6.23567	6.97692	8.32121	8.73779	8.73478	5.7056	6.04234	6.48183	5.81964	6.67763	6.96427	8.32637	8.21573	8.38016	4.26136	4.03356	3.93171		5.48513	5.56902	6.8515	7.4574	7.41707	3.65292	3.60546	3.54583	5.00476	4.4752	4.88793
4-aminobutyrate	0.432598	0.7195	0.676691	1	0.926851	0.943165	0.822625	0.780667	0.450675	0.735515	0.796749	0.718083	0.764035	0.923236	0.699738	0.733219	0.920504	0.882045	0.587607	0.538131	0.59834	0.63838	0.599364	0.546732		0.708446	0.44748	0.407097	0.443682	0.362941	0.52214	0.550245	0.432574	0.671721	1.33691	0.608698
4-phosphopantothenate	2.70636	2.1827	1.95243	2.5955	3.18113	2.82426	3.09814	3.19127	3.38716	2.01032	2.03658	2.09582	2.71216	2.71069	3.20449	2.64012	3.10373	3.11618	1.09217	1.00049	1	1.28734	1.18733	1.29699		1.6244	1.56191	1	1.13295	1.15294	1.29119	1.32524	1.3037	1.57851	1.36816	1.60596
4-Pyridoxic acid	0.506811	0.39482	0.353445	0.392848	0.471259	0.374674	0.267927	0.274647	0.436944	0.444389	0.583295	0.428537	0.494729	0.293537	0.33233	0.396643	0.282209	0.390777	0.636462	0.58944	0.696629	0.459236	0.567168	0.388117		0.26849	0.283162	0.448843	0.322475	0.461802	0.371444	0.260175	0.401823	0.221699	0.356019	0.336724
5-phosphoribosyl-1-pyrophosphate	6.01912	7.12714	4.46794	2.84077	3.73087	2.17069	7.06873	7.34738	4.86144	4.55171	3.74565	4.87049	3.86646	4.65059	5.11731	3.94459	6.22422	6.59944	0.548902	0.84081	0.754301	0.946431	0.794244	0.81129		2.26688	2.3092	1.25012	1.45469	1.89388	1.1486	1.38703	1.55412	2.90876	3.31008	3.15742
6-phospho-D-gluconate	1.22642	1.27798	1.18179	0.771258	0.923993	0.820892	0.852301	0.798527	0.889479	1	1	0.955312	0.78025	0.883925	0.922053	0.690675	0.821443	0.886519	0.846362	0.788114	0.845921	0.625537	0.581988	0.563856		0.514729	0.535401	0.78115	0.841129	0.837568	0.471413	0.454567	0.445779	0.50851	0.431939	0.496438
a-ketoglutarate	10.2756	11.8103	9.6008	10.9465	18.1403	12.102	8.06073	9.75354	10.1876	10.4458	14.8334	10.6539	14.3937	9.31634	9.42297	11.9461	8.94013	14.6916	6.67106	7.48853	8.15048	8.08736	9.61371	7.63593		6.69146	5.88808	7.04767	6.33214	5.39647	8.04314	5.96477	6.03427	6.43914	6.13069	6.02123
acetyl-aspartate	0.124418	0.052063	0.133187	0.101701	0.092099	0.125126	0.096447	0.125844	0.080647	0.069872	0.07616	0.076551	0.076045	0.13009	0.068927	0.064759	0.111568	0.116542	0.38616	0.334784	0.301995	0.061299	0.076487	0.132303		0.156172	0.070668	0.292394	0.341002	0.325417	0.071826	0.099787	0.055939	0.08497	0.136184	0.102623
acetyl-CoA	0.154468	0.173311	0.154951	0.154922	0.152378	0.146941	0.20491	0.180511	0.188797	0.151417	0.146464	0.153196	0.13342	0.15218	0.168581	0.15014	0.177492	0.189125	0.157252	0.150371	0.154457	0.090983	0.114931	0.104861		0.130653	0.114574	0.121409	0.168255	0.130418	0.087688	0.093345	0.08307	0.111115	0.096195	0.113815
Acetyllysine	0.156057	0.174885	0.193691	0.159676	0.180713	0.221466	0.209638	0.206919	0.163518	0.143353	0.14621	0.160655	0.211404	0.20216	0.185986	0.234562	0.273497	0.238443	0.661106	0.501286	0.536912	1	0.940536	1.08135		0.767085	0.704171	0.542951	0.585934	0.498253	1.13205	1.11845	0.970043	0.921936	0.782724	0.974988
aconitate	0.276767	0.252553	0.243782	0.293628	0.305188	0.27501	0.185046	0.180116	0.164579	0.30903	0.310973	0.345137	0.314105	0.349694	0.384691	0.129296	0.141674	0.19846	0.145265	0.23848	0.325489	0.164188	0.199199	0.102725		0.101956	0.093476	0.190362	0.343133	0.262943	0.190668	0.231518	0.245068	0.133245	0.180126	0.100541
ADP-D-glucose	0.159934	0.167914	0.138051	0.092235	0.116798	0.110562	0.124355	0.120471	0.125911	0.139924	0.154016	0.166905	0.110204	0.116381	0.137377	0.103892	0.116528	0.111795	0.255286	0.213841	0.25003	0.083895	0.077686	0.082135		0.102455	0.102833	0.113459	0.111405	0.132829	0.062183	0.07416	0.080748	0.091639	0.075077	0.088998
alanine/sarcosine	0.529499	0.470212	0.492514	0.372871	0.386647	0.521027	0.474055	0.424737	0.514691	0.334557	0.347248	0.322185	0.35598	0.373385	0.377833	0.516083	0.664469	0.52582	1	0.72716	0.710293	0.402021	0.382339	0.451337		0.439279	0.429095	0.761551	0.824718	0.785239	0.486954	0.536212	0.508462	0.621649	0.754338	0.691828
CDP	0.112634	0.123766	0.091812	0.159305	0.306713	0.26188	0.347482	0.44324	0.396958	0.096249	0.119188	0.10701	0.175536	0.177053	0.217636	0.258673	0.233932	0.232372	0.157376	0.142913	0.136243	0.169551	0.152523	0.196351		0.224513	0.252504	0.162443	0.180976	0.183024	0.132449	0.14394	0.154275	0.187348	0.172422	0.214201
CDP-choline	0.045981	0.067492	0.062669	0.057108	0.067834	0.058042	0.052218	0.055424	0.049951	0.05138	0.059749	0.05615	0.060482	0.061004	0.055389	0.056188	0.057358	0.062182	0.076031	0.063758	0.075711	0.059577	0.053122	0.05521		0.052362	0.051572	0.066183	0.067905	0.060263	0.046009	0.049387	0.04427	0.058181	0.042149	0.054141
CDP-ethanolamine	2.39953	3.54169	3.39694	2.9011	3.46718	3.07172	2.81839	2.82454	2.58663	2.49765	2.94235	2.66803	2.87148	2.75187	2.37919	2.68276	3.04147	3.0484	4.4714	4.15025	4.32349	2.5504	2.33655	2.42674		2.62288	2.30785	3.77202	4.12375	3.47646	2.06381	2.03718	1.846	2.58992	2.02867	2.48123
Cellobiose	0.016461	0.065179	0.098697	0.037451	0.032507	0.191431	0.032749	0.023908	0.021079	0.037982	0.000726	0.052622	0.028745	0.047182	0.021063	0.023246	0.07968	0.045032	0.016441	0.004362	0.004054	0.042632	0.007328	0.030083		0.055289	0.054043	0.01987	0.095143	0.00624	0.014813	0.031016	0.011073	0.031334	0.036485	0.021509
citrulline	0.063733	0.061312	0.113303	0.011104	0.012834	0.024694	0.003736	0.007405	0.007174	0.058918	0.049319	0.037765	0.029269	0.010291	0.012852	0.009216	0.025214	0.00689	0.097267	0.067382	0.062994	0.018824	0.03204	0.03017		0.014676	0.01611	0.020705	0.033538	0.029364	0.013256	0.010361	0.012905	0.019115	0.021932	0.026824
creatine	0.072451	0.07755	0.062561	0.006079	0.010095	0.014904	0.006603	0.013104	0.006464	0.117545	0.101152	0.11995	0.007668	0.008017	0.010917	0.004209	0.010258	0.009035	0.181342	0.139695	0.124561	0.018531	0.009272	0.017046		0.025823	0.027632	0.066486	0.053375	0.076601	0.012766	0.012363	0.014197	0.022552	0.027989	0.022114
CTP	3.64408	5.65793	4.99094	5.386	6.15673	5.40835	6.35692	6.18717	5.87569	4.84265	5.22869	5.00727	5.00721	5.05574	4.64513	4.93421	5.94503	6.23233	6.28258	6.1083	6.40095	4.68469	4.40892	4.5003		5.7836	5.7046	5.86815	6.70355	6.21786	3.59435	3.61004	3.54753	5.16874	4.41796	5.13701
Cystine	0.025728	0.020038	0.027697	0.052014	0.026399	0.027827	0.063444	0.035939	0.036955	0.177782	0.189166	0.162082	0.019941	0.063664	0.065868	0.028881	0.06319	0.06283	0.025018	0.112375	0.152767	0.077029	0.147798	0.049844		0.138146	0.185489	0.215794	0.439966	0.239936	0.040981	0.074038	0.078402	0.056651	0.078328	0.030236
cytidine	83.9301	86.1597	80.2189	58.9195	65.4994	66.7304	40.7969	40.3766	39.1132	68.688	72.7027	67.288	48.8366	48.2421	46.6316	36.225	44.6633	39.6172	82.4027	71.763	72.3103	54.3351	50.6542	55.0422		41.7833	39.6745	78.7181	86.3675	81.0757	52.0107	52.4504	50.8345	45.5528	50.655	45.924
D-gluconate	1.6451	3.19043	2.87053	2.46207	3.0301	2.71862	2.7927	2.82076	1.68807	2.51013	2.81776	2.63092	2.54027	2.49093	1.83028	2.32111	2.70856	2.69955	5.23281	4.90178	5.19654	1.85515	1.67774	1.73125		1.95714	1.76904	2.51623	2.89094	2.2857	1.42252	1.47782	1.41604	1.824	1.46248	1.80884
D-sedoheptulose-1/7-phosphate	1.12573	1.69731	1.67061	1.38758	1.39657	1.30602	1.44438	1.42073	1.57625	1.31896	1.45369	1.35315	1.59068	1.67731	1.53854	1.84294	2.22717	2.33913	2.39537	2.02332	2.20213	1.65943	1.64024	1.69221		1.83597	1.76759	2.07257	2.32524	2.11539	1.43675	1.54876	1.50793	2.10172	1.77094	2.11017
dAMP	0.008128	0.003576	0.011869	0.009868	0.037867	0.023619	0.028759	0.041244	0.028292	0.009305	0.009515	0.013617	0.018234	0.020977	0.014982	0.033336	0.018189	0.029016	0.004371	0.004849	0.006232	0.012557	0.011274	0.010243		0.031157	0.03186	0.007311	0.009678	0.004095	0.010393	0.011305	0.008563	0.01629	0.014912	0.019912
dATP	1.22993	1.35153	1.23943	1.07808	1.25903	1.1278	1.07797	1.05625	1	1.11651	1.18304	1.15868	1.11066	1.14857	1.20364	0.806932	0.999408	1.01369	1.13349	1.08719	1.15592	1.19789	1.11885	1.16508		1.06385	1.06025	1.06168	1.23097	1.19141	0.983424	0.980553	1.04308	0.99665	0.894675	0.99345
dCDP	0.024907	0.019907	0.033568	0.058631	0.130682	0.096757	0.117457	0.150514	0.114627	0.017406	0.022915	0.027326	0.083126	0.065285	0.073968	0.091848	0.072619	0.095466	0.006792	0.008638	0.012624	0.055643	0.043311	0.064939		0.032704	0.031221	0.00775	0.008611	0.007271	0.046104	0.04663	0.053501	0.045836	0.041318	0.054958
dCMP	0.09723	0.084361	0.085745	0.100201	0.139637	0.124595	0.073001	0.082435	0.084478	0.066675	0.061813	0.059661	0.120173	0.097945	0.108612	0.071558	0.065132	0.062903	0.027082	0.015155	0.028709	0.078796	0.05623	0.072266		0.041263	0.039126	0.025914	0.012278	0.026938	0.074171	0.081201	0.07551	0.04645	0.040458	0.045149
dCTP	1	1.42579	1.24379	1.63155	1.89555	1.68836	1.76526	1.69063	1.62212	1.01634	1.04926	1.02706	1.55315	1.55743	1.48526	1.36343	1.70706	1.77164	0.594591	0.569592	0.590416	1.33336	1.24452	1.2773		0.995934	1	0.607563	0.675557	0.649982	1.15844	1.15792	1.17609	0.978158	0.834554	0.978348
dGDP/ADP	7.1689	6.73738	5.81658	7.61075	14.0383	10.9293	11.0343	13.5215	12.0661	5.81055	6.24447	5.98789	8.86451	7.77048	9.4303	8.15218	7.72706	7.82644	7.29912	7.16068	6.95324	9.73316	8.46808	9.17931		8.67136	8.59357	6.58142	6.93063	7.39818	7.44458	7.71521	8.02542	7.31463	6.7344	7.62578
dGMP/AMP	1.09019	1.97153	1.54883	1.90843	4.18022	3.26939	3.43995	4.74011	3.56524	1.23767	1.38569	1.2896	2.35405	2.07552	1.96276	3.12871	2.62072	2.6103	1.56061	1.46381	1.49778	1.95463	1.82598	1.90439		2.91216	2.62533	1.47712	1.58979	1.45819	1.64523	1.80469	1.65807	2.3881	2.07326	2.22437
dGTP/ATP	90.4345	101.535	90.1077	89.9429	100.834	93.6814	80.6455	78.7023	80.4847	101.282	103.8	105.857	80.9254	84.3366	93.2629	58.0817	72.0754	72.9872	107.098	102.957	108.054	101.303	95.2001	96.9638		86.0018	87.5844	85.661	97.8995	100.735	79.1655	79.8576	83.8835	71.9625	68.6894	73.0823
dihydroorotate	0.263063	0.588219	0.333492	0.274783	0.339066	0.341076	0.372061	0.348531	0.384272	0.276509	0.307452	0.308787	0.347421	0.325364	0.314002	0.43365	0.544244	0.462022	0.177326	0.19206	0.192444	0.296077	0.269226	0.274188		0.322081	0.296172	0.169257	0.205965	0.194381	0.281998	0.479339	0.262868	0.340099	0.35949	0.372949
DL-Pipecolic Acid	2.4948	2.87793	2.56638	2.29591	2.67989	2.69703	2.5901	2.61209	2.1654	1.8548	1.86305	1.7963	2.39739	2.41435	2.23938	2.36395	2.84924	2.74088	1.51879	1.25671	1.33851	2.33369	2.17179	2.3859		2.10858	1.99621	1.40744	1.55911	1.38603	1.91217	1.96143	1.88271	1.97452	1.94844	2.08588
dTDP	0.250093	0.199774	0.205011	0.245573	0.453895	0.379919	0.337452	0.419731	0.361284	0.154607	0.168314	0.143039	0.307458	0.261907	0.310427	0.283437	0.217658	0.239784	0.152074	0.148559	0.132432	0.265823	0.210828	0.246038		0.225413	0.222839	0.149253	0.172091	0.159793	0.215885	0.199342	0.219935	0.209242	0.199578	0.232109
dTMP	0.043445	0.04849	0.044837	0.031181	0.088967	0.055123	0.050865	0.094865	0.065513	0.024871	0.021564	0.029498	0.065877	0.0562	0.058187	0.070259	0.066507	0.054877	0.012136	0.0158	0.024292	0.027888	0.030865	0.025973		0.036491	0.033388	0.012919	0.026624	0.015408	0.028832	0.028885	0.028817	0.04646	0.038773	0.043429
dTTP	3.33696	3.49308	3.14713	3.02568	3.37855	3.16631	2.51091	2.38918	2.62107	2.73935	2.75256	2.78138	2.87337	3.03967	3.43793	1.99215	2.48326	2.48115	1.96521	1.8825	1.92125	2.75134	2.54242	2.65018		2.24747	2.28452	1.81126	2.1023	2.2172	2.16538	2.22174	2.26736	2.06276	1.88802	2.10018
FAD	0.104493	0.108654	0.105847	0.113874	0.146105	0.122132	0.132635	0.142888	0.142824	0.101442	0.097306	0.109256	0.108069	0.105364	0.124875	0.107348	0.125404	0.130776	0.100243	0.094793	0.103112	0.091208	0.083878	0.079313		0.090699	0.093944	0.090482	0.107216	0.106117	0.072867	0.07114	0.078678	0.089829	0.073499	0.085836
fructose-1-6-bisphosphate	8.5752	8.25777	7.22912	4.35086	4.90747	4.14498	3.73253	3.53344	4.21086	7.11738	7.62095	7.34984	4.72999	4.85259	5.1949	3.40648	4.24326	4.40321	9.04162	9.29728	9.42898	3.97216	3.71276	3.90785		4.32103	4.25079	6.60414	7.21222	7.30791	3.20569	3.23052	2.8998	4.32703	3.75573	4.35188
fructose-6-phosphate/glucose-1-phosphate	14.1322	17.9875	17.1182	11.4635	9.35388	8.99896	8.12611	7.53969	8.68138	13.6232	15.3686	13.2363	11.8346	14.2369	12.9126	8.36869	11.0452	11.209	20.0559	18.0436	18.8339	16.339	17.2142	16.9138		14.8378	14.721	16.5466	17.8484	16.5693	15.1503	16.3096	16.1227	18.4259	14.8343	18.0972
fumarate	3.48331	4.13581	3.71208	3.79499	4.51902	3.9546	4.51501	4.5135	4.44259	3.09293	3.2762	3.28281	3.53559	3.70879	3.56962	3.99188	4.99812	4.90831	2.45556	2.10143	2.19423	2.06604	1.97397	2.00523		2.13495	2.0339	2.1362	2.39576	2.32791	1.76828	1.88676	1.96734	2.06687	2.12462	2.2827
GDP	0.375424	0.383516	0.308718	0.537601	1.00694	0.764789	0.975503	1.23737	1.02563	0.346759	0.417663	0.390494	0.611301	0.532407	0.609252	0.801028	0.69488	0.751996	0.534504	0.550315	0.536642	0.711398	0.582195	0.638912		0.763084	0.758145	0.519601	0.566773	0.614907	0.506585	0.542652	0.54385	0.592415	0.567203	0.649384
glucono-lactone	0.703425	0.967268	0.873701	0.263881	0.221447	0.271462	0.166912	0.127021	0.149969	1.1834	1.18139	1.17334	0.330827	0.309511	0.245235	0.192909	0.285547	0.214764	2.24673	1.985	2.13128	0.403264	0.371964	0.378395		0.337723	0.253602	0.513742	0.573122	0.499359	0.266585	0.297544	0.257859	0.335826	0.420437	0.335857
glutathione disulfide	2.43826	5.49587	6.30175	6.45312	8.14611	8.15782	6.54605	7.22977	7.83892	4.92997	9.03295	6.52677	7.33907	5.52726	3.71343	8.02266	7.79373	9.54773	7.25576	6.04395	7.75133	5.21406	4.73857	5.10364		3.59061	3.95909	4.57714	5.12603	3.51441	4.09891	3.12569	3.95437	4.65227	3.30131	5.15712
GMP	0.324738	0.666134	0.512419	0.838513	1.47817	1.1854	1.07853	1.40031	0.963194	0.74057	0.821097	0.828352	1.04943	0.927896	0.763632	1.05912	0.933424	0.93717	0.987221	1	1.03023	1.07377	0.865695	0.958821		0.840492	0.706745	0.928581	1	0.895934	0.922274	0.943889	0.800347	0.783473	0.65314	0.721504
GTP	5.43833	10.2437	8.99001	10.7152	12.1103	10.4495	12.3747	11.8858	9.11827	10.7036	11.8813	11.2131	9.82413	10.0408	7.57715	9.45793	11.875	12.3995	13.9994	14.0641	14.8326	12.228	11.8288	11.4863		12.4501	11.8125	12.9601	14.8961	13.3642	9.3449	9.52278	9.43206	10.0855	8.65911	9.95115
guanine	0.040949	0.048968	0.044048	0.065231	0.073181	0.057952	0.243286	0.30716	0.171171	0.056613	0.072706	0.062159	0.064472	0.086298	0.072814	0.188065	0.205926	0.207548	0.103922	0.091776	0.083734	0.120861	0.124163	0.127416		0.300816	0.289446	0.07428	0.092058	0.080733	0.088765	0.104066	0.092847	0.230023	0.19842	0.257711
Hexose	6.644	7.51729	5.35905	7.86463	4.54464	2.65617	5.91162	4.85986	4.19376	17.6296	23.5947	22.2807	6.16227	9.28946	9.10383	4.60592	6.48788	8.21619	18.8199	20.1754	27.4993	9.57215	12.2706	7.29316		9.96721	12.6043	19.8878	34.3202	28.1717	6.96015	8.64221	9.25864	6.88567	6.56287	4.65258
hydroxyproline/Aminolevulinate	2.31035	2.13748	2.05678	1.64216	1.55702	1.86652	1.46329	1.32801	1.53159	2.11177	2.25593	2.129	1.46754	1.70568	1.62279	1.35973	1.78406	1.55426	2.56118	2.25205	2.43065	1.40223	1.48637	1.44941		1.47502	1.53679	1.84286	2.41849	2.22791	1.16036	1.22916	1.25445	1.28535	1.5213	1.23395
hypoxanthine	3.29079	4.77477	3.68915	3.6964	2.56841	1.62225	3.69831	3.21214	1.66254	9.39409	13.0684	11.3344	3.49849	4.97094	3.97781	2.9735	3.96413	5.15309	14.2845	15.8386	19.293	8.04728	8.86069	7.05668		7.93731	8.30339	10.0952	16.9228	11.9009	6.47628	7.20374	6.86112	6.95343	5.16696	5.92987
IDP	0.00513	0.020483	0.011033	0.000934	0.001131	0.001339	0.000876	0.000823	0.000873	0.034475	0.039426	0.030731	0.000878	0.000726	0.000835	0.002111	0.001173	0.00053	0.137165	0.12489	0.125415	0.000608	0.000941	0.00101		0.006482	0.009165	0.030909	0.036078	0.013047	0.000804	0.000837	0.000793	0.005065	0.000626	0.006168
IMP	4.04126	5.92654	5.45312	2.5182	3.25897	2.89293	3.21398	3.30233	2.8931	5.47347	5.71393	5.83174	3.60957	3.54237	3.46602	3.08477	3.45553	3.60701	11.7831	10.6316	11.1306	3.2004	3.06495	3.16627		3.18752	3.13771	3.96762	4.40341	3.9673	2.44443	2.58926	2.50446	3.30235	2.75826	3.17553
inosine	0.07159	0.134512	0.120083	0.199426	0.2356	0.209249	0.170827	0.170801	0.150906	0.113084	0.138218	0.115799	0.271665	0.262858	0.215196	0.189384	0.213265	0.216153	0.289695	0.256481	0.269391	0.337839	0.304098	0.326241		0.170765	0.143072	0.117177	0.133173	0.101516	0.252717	0.254201	0.201663	0.17294	0.131761	0.162671
L-arginino-succinate	0.03568	0.049874	0.043247	0.01556	0.023736	0.020915	0.022206	0.023346	0.008583	0.040076	0.046486	0.036347	0.020951	0.023775	0.018743	0.030675	0.031624	0.032654	0.050944	0.048917	0.053862	0.006441	0.0096	0.007326		0.009308	0.006369	0.033346	0.041601	0.029513	0.009406	0.005153	0.006466	0.013563	0.010861	0.010705
lactate	80.2042	72.5583	83.0053	80.0485	50.7673	64.061	92.3183	77.2483	98.3027	60.5704	65.7392	73.3997	73.6463	69.9762	81.0036	76.1805	135.403	131.098	82.4552	58.8817	50.2666	63.0045	67.9314	56.0124		98.8027	113.228	27.0648	60.5624	44.173	23.7761	38.499	45.194	79.1228	102.073	79.1986
malate	46.3741	46.6483	42.2614	43.0257	52.1142	46.1778	53.6616	54.5116	55.0993	36.0527	37.7582	37.4251	40.64	42.7304	43.7035	45.7713	56.6198	57.072	27.9189	26.135	25.6939	24.0925	22.9125	23.1901		25.0472	24.3141	25.5539	28.418	27.9308	21.1821	22.2805	23.3437	24.1281	25.0155	26.4824
myo-inositol	0.042264	0.166296	0.184179	0.300653	0.084169	0.219741	0.65292	0.351305	0.420906	0.13424	0.10597	0.119461	0.173804	0.330903	0.260407	0.441553	0.818971	0.777416	0.17707	0.10658	0.137493	0.112209	0.104339	0.078358		0.422263	0.535984	0.227889	0.053894	0.006907	0.093931	0.046473	0.064083	0.46697	0.341118	0.354716
N-acetyl-glucosamine	0.023328	0.032011	0.032234	0.011017	0.011874	0.010804	0.012063	0.012879	0.001211	0.059853	0.055493	0.056194	0.007473	0.00368	0.005776	0.009274	0.012557	0.012931	0.087944	0.075797	0.073473	0.011082	0.014737	0.013602		0.022304	0.020156	0.036424	0.048065	0.032183	0.009815	0.012497	0.012188	0.021668	0.017992	0.021703
N-acetyl-glutamate	0.444335	0.5277	0.489481	0.541984	0.62497	0.549868	0.576021	0.563428	0.549746	0.452698	0.492074	0.486041	0.550953	0.524092	0.47604	0.526097	0.568188	0.558118	0.464068	0.435194	0.456222	0.419731	0.39611	0.425631		0.400077	0.371333	0.369468	0.396423	0.350671	0.32671	0.331092	0.37967	0.416714	0.423939	0.405872
N-Acetyl-L-alanine	0.741922	0.928561	0.803917	0.903929	0.962714	0.902174	0.964354	0.949642	0.910288	0.832733	0.665888	0.838374	0.915867	1	1	0.775582	0.992805	1	0.373311	0.431459	0.405301	0.701451	0.662318	0.715221		0.581339	0.582154	0.327636	0.313507	0.519843	0.609846	0.623409	0.744738	0.491093	0.873047	0.548131
N-acetyl-L-ornithine	0.180841	0.228092	0.210341	0.207064	0.232759	0.235202	0.267908	0.274045	0.199977	0.216903	0.228872	0.222723	0.293489	0.286973	0.261255	0.346212	0.38188	0.372323	0.960712	0.801116	0.845011	1.86828	1.72212	1.89548		1.087	1.00982	1.01224	1.13404	1	2.1852	2.14248	2.02524	1.32019	1.22143	1.32495
N-carbamoyl-L-aspartate	1.90333	1.92447	1.76777	1.7824	2.19958	2.00547	2.44262	2.60134	2.3939	1.99804	2.04654	2.05493	1.94941	2.05931	2.17306	2.52828	2.93053	3.15093	0.86557	0.772242	0.852719	1.37573	1.27662	1.37905		1.22815	1.28891	0.826355	0.914235	0.961682	1.39661	1.44605	1.52548	1.7633	1.43618	1.95841
NAD+	14.2171	16.8847	15.8667	14.5205	17.3997	15.4677	13.7463	13.9277	14.1947	12.9715	14.2126	13.2805	13.8775	12.949	13.0342	12.8076	14.7734	14.349	17.7907	16.1792	16.8525	12.6084	11.759	12.2694		12.1449	12.0737	13.2664	14.6572	13.0858	10.2509	10.1209	9.51111	12.417	10.65	11.3885
NADP+	3.34136	2.67252	2.3665	2.13677	2.93572	2.51495	2.13847	2.23441	2.62888	2.26134	2.66362	2.43432	2.87146	2.10633	2.69969	2.22188	2.00351	2.71853	0.846307	0.846406	0.796896	0.780374	0.791559	0.786237		0.48951	0.617315	0.68311	0.707918	0.829072	0.734769	0.623079	0.77146	0.557022	0.470815	0.692088
NADPH	1.20974	2.35468	2.10732	1.10731	0.867718	0.671802	1.84693	1.88362	0.597066	1.62456	0.626216	1.58854	0.69316	2.54391	2.13306	0.763769	2.4162	0.760882	0.513094	0.331245	0.522217	0.383277	0.209824	0.359536		0.94082	0.659713	0.418855	0.684438	0.362633	0.355244	0.667757	0.248788	0.807024	0.859416	0.453592
nicotinamide mononucleotide	0.084024	0.099072	0.093683	0.069993	0.084298	0.084932	0.059834	0.061485	0.043046	0.055615	0.056332	0.055241	0.073223	0.067837	0.060194	0.046825	0.057856	0.05077	0.075182	0.061764	0.070176	0.043291	0.036812	0.041296		0.038772	0.037934	0.048464	0.052791	0.045112	0.040372	0.037624	0.037874	0.045517	0.040922	0.049732
nicotinate	0.179034	0.158264	0.156008	0.204079	0.234803	0.198308	0.380786	0.368201	0.409926	0.144882	0.116885	0.161098	0.190792	0.204474	0.22078	0.295243	0.357255	0.358997	0.084434	0.093461	0.089119	0.131916	0.120427	0.121641		0.249662	0.254239	0.09921	0.085834	0.090001	0.090541	0.094692	0.088365	0.181545	0.182715	0.180404
Nicotinic acid mononucleotide	1.0244	1.88758	1.52966	1.26704	1.52629	1.2935	1.12547	1.14971	1.05589	1.36569	1.37473	1.33638	1.37614	1.25202	1.05449	1	1	1.08873	1.50003	1.40443	1.44857	1.33217	1.26741	1.34898		1.02047	0.902587	1.00499	0.903239	0.997071	1.04683	0.935442	0.973849	1	0.876343	1
Octulose Bisphosphate	0.182353	0.162982	0.165453	0.162612	0.205718	0.168338	0.179088	0.190757	0.217799	0.172496	0.160748	0.143162	0.140687	0.148701	0.173475	0.15094	0.174776	0.18009	0.202714	0.189788	0.209344	0.166383	0.134958	0.152288		0.160833	0.127442	0.189558	0.224999	0.215875	0.120306	0.122131	0.108704	0.166355	0.13507	0.148047
ornithine	0.387806	0.300783	0.33431	0.173698	0.164918	0.243853	0.175502	0.168481	0.211771	0.277385	0.263641	0.253797	0.199777	0.175133	0.179382	0.202507	0.281272	0.197654	0.440857	0.324452	0.339394	0.121454	0.135887	0.13848		0.119004	0.100096	0.165434	0.223224	0.188952	0.094481	0.090425	0.110683	0.139888	0.150577	0.146295
orotate	0.104478	0.171814	0.172803	0.181992	0.208107	0.175237	0.249484	0.225339	0.337931	0.120261	0.182848	0.121289	0.271915	0.257907	0.182812	0.474732	0.471543	0.523321	0.125729	0.125685	0.105994	0.116203	0.133333	0.139191		0.162068	0.106383	0.11292	0.099063	0.104787	0.187816	0.181252	0.104838	0.280716	0.254302	0.286057
Phenol Red	0.831055	0.890661	0.894726	0.725753	0.710163	0.791897	0.867621	0.825168	0.819506	0.8419	1.08563	1	0.573122	0.803248	0.919151	0.660518	0.958657	0.901181	2.15065	2.09162	2.33423	2.80427	2.81291	2.67247		3.93708	3.94093	2.1707	2.99508	2.56115	2.45301	2.6967	2.60965	3.89679	3.30465	3.83363
Phenylacetyl-CoA	0.00023	0.000647	0.000542	0.000483	0.000537	0.000172	0.000129	0.000134	0.000142	0.000197	0.000755	0.000216	0.000256	0.000134	0.000136	0.000129	0.00016	0.000147	0.006895	0.006353	0.00253	0.000165	0.000153	0.000165		0.000172	0.000181	0.000253	0.000289	0.000277	0.000131	0.000137	0.000129	0.000124	0.000102	0.00012
phosphoenolpyruvate	2.92869	3.20654	2.7027	1.34752	1.75036	1.50409	1.82023	1.82848	1.83241	2.43957	2.57381	2.56118	1.56476	1.58509	1.72281	1.67747	1.98641	2.05404	2.38056	2.23849	2.39649	1.21042	1.13405	1.13385		1.73998	1.76083	1.90445	2.18552	2.24535	1.02007	1.06849	1	1.40152	1.31347	1.37822
PTT	0.051669	0.051997	0.056401	0.052568	0.061708	0.067289	0.064508	0.064875	0.052502	0.034729	0.038115	0.033486	0.060913	0.054212	0.056919	0.073017	0.09053	0.078389	0.16998	0.121112	0.148321	0.247345	0.218478	0.279312		0.177208	0.178261	0.150612	0.18289	0.163504	0.321948	0.309109	0.329139	0.249577	0.242984	0.275588
pyridoxine	0.119163	0.288747	0.240521	0.247016	0.20449	0.177985	0.261315	0.205431	0.081627	0.364938	0.635413	0.487889	0.228215	0.303045	0.170811	0.214401	0.265001	0.357037	0.533533	0.675925	0.859125	0.333627	0.353656	0.268775		0.323701	0.288704	0.48083	0.850987	0.397613	0.25649	0.313818	0.237277	0.310214	0.163741	0.21302
Pyroglutamic acid	18.6389	19.1513	16.7801	17.6702	19.7614	18.8721	13.3092	15.4478	14.4039	18.7406	23.6924	20.9362	19.7662	17.7353	18.1005	15.0435	19.5414	17.5929	16.9811	18.7133	20.8856	15.4777	17.0869	14.8957		12.501	12.9253	12.6916	23.3995	17.2918	12.6459	13.8246	13.4449	11.0668	11.1968	11.7601
ribose	0.129302	0.19227	0.121951	0.197739	0.143877	0.094144	0.154317	0.122204	0.09619	0.414432	0.580482	0.522575	0.156316	0.225332	0.214511	0.118806	0.15837	0.209735	0.468767	0.496927	0.657692	0.257937	0.289839	0.180396		0.249862	0.287233	0.463333	0.813106	0.631006	0.171911	0.222607	0.206449	0.16798	0.161205	0.122806
ribulose-5-phosphate	2.2548	4.11339	5.60889	3.06234	3.25507	4.17766	1.93219	1.95862	3.59092	1.7701	3.21511	1.7382	3.39396	2.1815	1.73856	5.10997	4.0853	3.79863	2.53416	2.03326	2.31652	1.86318	2.05639	1.99745		1.69381	1.53577	2.53271	2.7166	1.99559	1.69608	1.51377	1.26174	2.49235	1.56148	2.38133
S-adenosyl-L-homocysteine	0.310315	0.490305	0.452154	0.481835	0.583779	0.505893	0.54671	0.538007	0.482189	0.31381	0.360373	0.344931	0.359579	0.356334	0.299204	0.386715	0.441749	0.450588	0.386863	0.351003	0.364853	0.598891	0.541432	0.583006		0.604963	0.579357	0.291085	0.321323	0.2693	0.300851	0.298739	0.272509	0.511174	0.405451	0.486945
Sedoheptulose bisphosphate	0.662482	0.608574	0.575526	0.411332	0.509004	0.435871	0.483391	0.444134	0.480859	0.485979	0.533621	0.516369	0.426891	0.438785	0.482343	0.398334	0.487159	0.491841	0.755066	0.774794	0.737206	0.335678	0.299352	0.332334		0.460116	0.461557	0.720177	0.812556	0.858203	0.308064	0.3072	0.298785	0.478619	0.373848	0.44708
sn-glycerol-3-phosphate	27.2718	49.7906	44.6913	35.3857	42.1224	36.9752	18.8178	18.6598	19.3928	31.7925	38.0776	32.3186	37.4924	33.7043	27.7142	22.11	24.6887	24.963	53.8952	50.3164	54.2296	32.2807	30.1657	31.2668		10.8332	8.64578	52.2888	55.3112	48.8446	29.2799	28.3636	22.7788	11.1204	9.20895	10.5549
succinate/Methylmalonic acid	24.2431	25.2586	20.8694	13.5138	14.7559	14.7493	6.87884	6.38023	7.90115	14.9011	16.3788	15.1097	11.7496	11.4931	11.6419	8.37552	10.6204	9.00149	12.7519	11.8384	12.9231	16.0821	14.0067	13.7351		12.1215	12.0332	12.4598	13.7461	14.3933	15.3329	14.9268	14.3823	14.7942	16.6416	15.0728
taurine	0.131804	0.105978	0.158966	0.156768	0.133834	0.164708	0.03832	0.053617	0.06314	0.137377	0.138479	0.110549	0.106566	0.052871	0.054259	0.057269	0.113004	0.054832	0.220209	0.149353	0.242416	0.106722	0.062294	0.106389		0.061753	0.071372	0.058704	0.101388	0.069789	0.157772	0.065954	0.372961	0.063985	0.08938	0.084392
thiamine	0.138517	0.270973	0.332089	0.249288	0.280934	0.375978	0.249467	0.225635	0.095174	0.179296	0.209771	0.165751	0.239672	0.213788	0.128632	0.268022	0.336847	0.252055	0.157813	0.129592	0.14276	0.10854	0.101188	0.114075		0.113123	0.091247	0.071796	0.096668	0.044878	0.088157	0.086425	0.087082	0.174051	0.115218	0.18369
threonine/homoserine	1.89611	2.02594	2.02365	1.52261	1.53439	1.8	1.47565	1.38449	1.42161	1.76818	1.87815	1.70137	1.52978	1.6444	1.49772	1.75655	2.31746	1.87169	2.17053	1.86929	2.10907	1.39668	1.44107	1.44514		1.50313	1.43124	1.63127	2.05112	1.76943	1.35776	1.39577	1.38298	1.63537	1.62478	1.66036
trehalose/sucrose	0.014687	0.058769	0.094174	0.034074	0.027931	0.200809	0.02983	0.029677	0.028575	0.034804	0.032727	0.050013	0.025673	0.043445	0.030486	0.021372	0.07632	0.042774	0.01039	0.004387	0.007676	0.038416	0.017925	0.02596		0.050892	0.059726	0.012842	0.08827	0.008634	0.01177	0.030598	0.02288	0.028217	0.049243	0.018162
UDP	1.05	1	0.86895	1.4058	2.62378	2.11922	2.41373	3.03702	2.65548	0.723841	0.867585	0.826325	1.6269	1.40808	1.64525	1.94685	1.65958	1.79195	0.842848	0.848177	0.779136	1.40524	1.11344	1.22681		1.40278	1.40236	0.924484	0.953845	1.08623	1	1.07928	1.09496	1.28116	1.15689	1.35479
UDP-D-glucose	2.92659	2.93528	2.52546	1.9162	2.44662	2.17672	2.24763	2.31553	2.25855	2.18301	2.20083	2.32618	1.76225	1.83392	1.99297	1.65912	1.84809	1.97352	6.65607	6.09769	6.56361	2.39796	2.1539	2.32508		2.33701	2.34855	6.45397	7.2549	7.3634	1.76256	1.81622	1.83839	2.00067	1.66407	1.99172
UDP-D-glucuronate	0.378583	0.396997	0.334037	0.257377	0.326864	0.280709	0.266375	0.268394	0.307451	0.317778	0.344369	0.327866	0.293599	0.313809	0.334629	0.23649	0.287854	0.288986	0.259889	0.252068	0.260206	0.172483	0.164539	0.19154		0.195976	0.188805	0.182199	0.210648	0.193199	0.14933	0.153537	0.146724	0.168958	0.171138	0.188363
UDP-N-acetyl-glucosamine	1.44346	1.44378	1.3104	1.28062	1.61848	1.42964	1.63253	1.70487	1.65381	1.17931	1.22299	1.21177	1.25608	1.29448	1.43838	1.23256	1.33552	1.44963	2.34701	2.09206	2.23667	1.7909	1.5597	1.69465		2.06644	2.18007	1.91242	2.1314	2.18317	1.37848	1.41837	1.45543	2.01435	1.69842	1.99336
UMP	2.81964	3.34797	2.53902	3.21157	5.52475	4.51736	3.66049	4.91872	3.7852	2.87758	2.80899	3.20983	3.97419	3.4063	3.63761	3.18038	2.70405	2.81875	2.51081	2.61193	2.70874	2.8273	2.36165	2.53798		2.15616	2.09996	2.40083	2.73804	2.56533	2.45566	2.44071	2.34966	2.1019	1.92738	2.08628
UTP	21.7453	27.1426	24.7967	24.8048	27.8202	24.6584	26.7297	25.8763	25.508	23.1251	23.8325	23.5564	23.1292	23.8382	24.3706	20.7424	25.6249	26.4643	19.682	19.3118	19.7675	19.3043	18.2024	18.6613		20.0229	20.5334	18.4859	20.3136	20.3765	15.7436	15.8197	16.428	18.1928	15.8598	18.4359

## Sheet: Avg of median normalized counts
	NF54 +aTc bio 1	NF54 +aTc bio 2	NF54 +aTc bio 3	NF54 No aTc bio 1	NF54 No aTc bio 2	NF54 No aTc bio 3	Dd2 +aTc bio 1	Dd2 +aTc bio 2	Dd2 +aTc bio 3	Dd2 No aTc bio 1	Dd2 No aTc bio 2	Dd2 No aTc bio 3
arginine	1.65056	1.53464	1.37134	1.62406	1.24944	1.47986	1.23119	0.722191	0.813808	1.23573	0.661084	0.91112
asparagine	6.29122	4.74821	4.22685	4.81858	4.2243	5.38145	5.83267	3.55182	3.88662	5.14396	3.52628	4.8806
aspartate	26.7196	33.2387	30.502	30.6674	31.3213	38.4565	36.6638	38.1355	38.7823	36.7497	39.4334	46.8415
glutamate	134.072	147.197	141.6	140.354	137.865	149.674	100.082	103.717	106.288	90.6812	94.0516	103.063
glutamine	23.4779	17.5941	15.5803	25.4136	18.1105	19.4926	24.1969	15.1817	17.1344	22.2053	13.4265	15.9078
histidine	0.709166	0.605331	0.516906	0.607817	0.617995	0.770941	1.16033	0.696569	0.527457	1.13482	0.777043	0.781375
isoleucine	18.0462	15.734	16.4203	27.0815	18.7665	22.546	28.2887	17.1621	18.9631	27.1111	18.2474	18.3391
lysine	1.05423	0.87548	0.998786	0.888036	0.979489	1.37857	0.507111	0.473706	0.562144	0.507734	0.570444	0.800999
methionine	1.8737	1.44307	1.46712	3.22715	2.02651	2.39045	3.7015	1.69053	1.80479	3.39891	1.83438	1.76468
proline	1.09748	1.00453	1.01827	1.39161	1.09508	1.26507	1.49126	0.974105	1.1889	1.41314	0.931698	1.11617
serine	1.62565	1.18263	0.981135	1.31552	1.09159	1.38554	1.78012	0.985105	1.00007	1.50077	0.967442	1.25762
tryptophan	1.83077	1.19534	1.46838	2.12627	1.4851	1.70484	2.46465	1.20728	1.74806	2.09421	1.31972	1.6222
tyrosine	7.30208	6.1323	6.13291	9.332	7.02154	8.33684	10.0833	6.00288	6.70863	9.1423	6.07834	6.5107
valine	3.58379	3.1092	2.99372	3.77525	3.22253	4.19603	3.78844	2.61213	2.7211	3.30504	2.64123	3.03244
PE	1.5593	1.69641	1.52412	1.66614	1.83536	2.43119	10.217	21.2709	10.7943	12.4166	23.7081	18.325
PD	7.65696	8.9393	6.78338	6.50702	7.52879	8.55211	9.02763	17.4788	10.6451	9.68357	17.1969	15.7602
PEEK	0.0616773	0.0997443	0.0930953	0.0714023	0.0974873	0.123025	0.112646	0.147441	0.107357	0.11173	0.175929	0.136412
DLH	1.11506	1.71957	1.20773	1.53014	1.58255	1.39654	2.38448	4.21294	2.23618	2.79035	4.49773	3.16333
SD	0.280474	0.294211	0.252397	0.357949	0.364568	0.457477	0.605475	0.936925	0.596927	0.779602	1.21788	1.02721
SID	0.42327	0.478878	0.523237	0.516756	0.599785	0.572178	1.4199	2.34656	1.73278	1.72308	2.73085	1.7115
VD	0.897853	0.792124	0.570407	0.50997	0.662558	1.16392	1.51109	2.75681	1.47935	1.7756	3.46333	3.07644
LD	0.06895	0.0636573	0.0776517	0.079867	0.0744603	0.133748	0.130545	0.13428	0.109535	0.134809	0.175498	0.182227
SDL/DLS	0.4263	0.48286	0.52178	0.514624	0.601259	0.570133	1.41349	2.30516	1.71948	1.7221	2.71805	1.70362
VDPVNF	0.0403967	0.0540417	0.068305	0.0530043	0.065996	0.080418	0.0607633	0.0544647	0.046488	0.0740953	0.0707203	0.0614407
2-dehydro-D-gluconate	0.038996	0.025756	0.0103103	0.0545203	0.0164723	0.0229207	0.124373	0.0238693	0.014068	0.0333577	0.0145323	0.0198213
2_3-Diphosphoglyceric acid	81.7212	44.4588	45.0159	86.9999	49.9282	45.6093	75.5906	38.4996	46.1734	75.261	34.9974	38.3601
3-phosphoglycerate	10.054	5.47997	6.42526	8.59793	6.07659	6.48718	8.30742	4.07554	5.52707	7.24199	3.6014	4.7893
4-aminobutyrate	0.609596	0.956672	0.684656	0.750116	0.79567	0.845256	0.574693	0.594825	0.577963	0.404573	0.501653	0.872444
4-phosphopantothenate	2.2805	2.86696	3.22553	2.04757	2.87578	2.95334	1.03089	1.25722	1.59316	1.0953	1.30671	1.51754
4-Pyridoxic acid	0.418359	0.412927	0.326506	0.485407	0.373532	0.356543	0.640844	0.471507	0.275826	0.41104	0.344481	0.304814
5-phosphoribosyl-1-pyrophosphate	5.8714	2.91411	6.42585	4.38928	4.54479	5.58942	0.714671	0.850655	2.28804	1.5329	1.36325	3.12542
6-phospho-D-gluconate	1.22873	0.838714	0.846769	0.985104	0.862076	0.799546	0.826799	0.59046	0.525065	0.819949	0.457253	0.478962
a-ketoglutarate	10.5623	13.7296	9.33397	11.9777	11.0443	11.8593	7.43669	8.44567	6.28977	6.25876	6.68073	6.19702
acetyl-aspartate	0.103223	0.106309	0.100979	0.0741943	0.0916873	0.097623	0.34098	0.0900297	0.11342	0.319604	0.0758507	0.107926
acetyl-CoA	0.16091	0.151414	0.191406	0.150359	0.151394	0.172252	0.154027	0.103592	0.122614	0.140027	0.0880343	0.107042
Acetyllysine	0.174878	0.187285	0.193358	0.150073	0.19985	0.248834	0.566435	1.0073	0.735628	0.542379	1.07351	0.893216
aconitate	0.257701	0.291275	0.17658	0.321713	0.349497	0.156477	0.236411	0.155371	0.097716	0.265479	0.222418	0.137971
ADP-D-glucose	0.1553	0.106532	0.123579	0.153615	0.121321	0.110738	0.239719	0.0812387	0.102644	0.119231	0.0723637	0.085238
alanine/sarcosine	0.497408	0.426848	0.471161	0.334663	0.369066	0.568791	0.812484	0.411899	0.434187	0.790503	0.510543	0.689272
CDP	0.109404	0.242633	0.395893	0.107482	0.190075	0.241659	0.145511	0.172808	0.238509	0.175481	0.143555	0.191324
CDP-choline	0.058714	0.0609947	0.052531	0.0557597	0.0589583	0.058576	0.0718333	0.0559697	0.051967	0.0647837	0.0465553	0.0514903
CDP-ethanolamine	3.11272	3.14667	2.74319	2.70268	2.66751	2.92421	4.31505	2.4379	2.46536	3.79075	1.98233	2.3666
Cellobiose	0.0601123	0.0871297	0.025912	0.0304433	0.03233	0.0493193	0.00828567	0.026681	0.054666	0.0404177	0.0189673	0.029776
citrulline	0.0794493	0.0162107	0.006105	0.0486673	0.0174707	0.0137733	0.075881	0.0270113	0.015393	0.027869	0.012174	0.0226237
creatine	0.070854	0.0103593	0.00872367	0.112882	0.00886733	0.007834	0.148533	0.0149497	0.0267275	0.0654873	0.0131087	0.0242183
CTP	4.76432	5.65036	6.13993	5.0262	4.9027	5.70386	6.26394	4.5313	5.7441	6.26319	3.58397	4.9079
Cystine	0.0244877	0.0354133	0.045446	0.176343	0.0498243	0.0516337	0.09672	0.091557	0.161818	0.298565	0.0644737	0.0550717
cytidine	83.4362	63.7164	40.0956	69.5596	47.9034	40.1685	75.492	53.3438	40.7289	82.0538	51.7652	47.3772
D-gluconate	2.56869	2.73693	2.43384	2.65294	2.28716	2.5764	5.11038	1.75472	1.86309	2.56429	1.43879	1.69844
D-sedoheptulose-1/7-phosphate	1.49789	1.36339	1.48045	1.37527	1.60218	2.13641	2.20694	1.66396	1.80178	2.17107	1.49781	1.99428
dAMP	0.00785767	0.0237847	0.032765	0.0108123	0.0180643	0.026847	0.00515067	0.011358	0.0315085	0.007028	0.010087	0.017038
dATP	1.27363	1.15497	1.04474	1.15274	1.15429	0.940009	1.12553	1.16061	1.06205	1.16135	1.00235	0.961592
dCDP	0.0261273	0.0953567	0.127533	0.022549	0.0741263	0.0866443	0.00935133	0.054631	0.0319625	0.00787733	0.048745	0.0473707
dCMP	0.089112	0.121478	0.0799713	0.0627163	0.10891	0.066531	0.0236487	0.0690973	0.0401945	0.02171	0.0769607	0.044019
dCTP	1.22319	1.73849	1.69267	1.03089	1.53195	1.61404	0.584866	1.28506	0.997967	0.644367	1.16415	0.930353
dGDP/ADP	6.57428	10.8595	12.2073	6.01431	8.68843	7.90189	7.13768	9.12685	8.63247	6.97008	7.7284	7.22494
dGMP/AMP	1.53685	3.11935	3.9151	1.30432	2.13077	2.78658	1.5074	1.895	2.76875	1.50837	1.70266	2.22858
dGTP/ATP	94.0259	94.8196	79.9442	103.646	86.175	67.7148	106.036	97.8223	86.7931	94.765	80.9689	71.2447
dihydroorotate	0.394925	0.318308	0.368288	0.297583	0.328929	0.479972	0.187277	0.27983	0.309127	0.189868	0.341402	0.357513
DL-Pipecolic Acid	2.64637	2.55761	2.45586	1.83805	2.35037	2.65136	1.37134	2.29713	2.0524	1.45086	1.91877	2.00295
dTDP	0.218293	0.359796	0.372822	0.15532	0.293264	0.24696	0.144355	0.240896	0.224126	0.160379	0.211721	0.213643
dTMP	0.0455907	0.0584237	0.0704143	0.025311	0.060088	0.063881	0.0174093	0.028242	0.0349395	0.018317	0.0288447	0.0428873
dTTP	3.32572	3.19018	2.50705	2.75776	3.11699	2.31885	1.92299	2.64798	2.266	2.04359	2.21816	2.01699
FAD	0.106331	0.12737	0.139449	0.102668	0.112769	0.121176	0.0993827	0.0847997	0.0923215	0.101272	0.0742283	0.0830547
fructose-1-6-bisphosphate	8.02069	4.46777	3.82561	7.36272	4.92583	4.01765	9.25596	3.86425	4.28591	7.04142	3.112	4.14488
fructose-6-phosphate/glucose-1-phosphate	16.4126	9.93878	8.11573	14.076	12.9947	10.2076	18.9778	16.8223	14.7794	16.9881	15.8608	17.1191
fumarate	3.77706	4.08954	4.49037	3.21732	3.60467	4.63277	2.2504	2.01508	2.08442	2.28662	1.87413	2.15807
GDP	0.355886	0.769776	1.0795	0.384972	0.58432	0.749301	0.540487	0.644168	0.760614	0.567094	0.531029	0.603001
glucono-lactone	0.848131	0.252263	0.147967	1.17938	0.295191	0.231073	2.121	0.384541	0.295662	0.528741	0.273996	0.36404
glutathione disulfide	4.7453	7.58568	7.20491	6.82989	5.52659	8.45471	7.01701	5.01876	3.77485	4.40586	3.72633	4.37023
GMP	0.501097	1.16736	1.14734	0.796673	0.913651	0.976573	1.00582	0.966095	0.773618	0.941505	0.888837	0.719372
GTP	8.22401	11.0917	11.1262	11.266	9.14735	11.2442	14.2987	11.8477	12.1313	13.7401	9.43325	9.56526
guanine	0.044655	0.0654547	0.240539	0.063826	0.074528	0.200513	0.093144	0.124147	0.295131	0.082357	0.095226	0.228718
Hexose	6.50678	5.02181	4.98841	21.1683	8.18518	6.43666	22.1649	9.71196	11.2857	27.4599	8.287	6.03371
hydroxyproline/Aminolevulinate	2.1682	1.68857	1.44096	2.16557	1.59867	1.56602	2.41463	1.446	1.50591	2.16309	1.21465	1.34686
hypoxanthine	3.91824	2.62902	2.85766	11.2656	4.14908	4.03024	16.472	7.98822	8.12035	12.973	6.84704	6.01675
IDP	0.0122153	0.00113467	0.000857333	0.0348773	0.000813	0.00127133	0.129157	0.000853	0.0078235	0.026678	0.000811333	0.003953
IMP	5.1403	2.89003	3.13647	5.67304	3.53932	3.38244	11.1818	3.14387	3.16262	4.11278	2.51272	3.07871
inosine	0.108728	0.214758	0.164178	0.122367	0.249906	0.206267	0.271856	0.322726	0.156918	0.117289	0.236194	0.155791
L-arginino-succinate	0.0429337	0.0200703	0.018045	0.0409697	0.0211563	0.031651	0.051241	0.007789	0.0078385	0.03482	0.00700833	0.0117097
lactate	78.5892	64.9589	89.2898	66.5697	74.8754	114.227	63.8679	62.3161	106.015	43.9334	35.823	86.7983
malate	45.0946	47.1059	54.4242	37.0787	42.358	53.1544	26.5826	23.3984	24.6806	27.3009	22.2688	25.2087
myo-inositol	0.130913	0.201521	0.475044	0.11989	0.255038	0.679313	0.140381	0.098302	0.479123	0.09623	0.0681623	0.387601
N-acetyl-glucosamine	0.029191	0.0112317	0.00871767	0.05718	0.005643	0.0115873	0.0790713	0.0131403	0.02123	0.0388907	0.0115	0.0204543
N-acetyl-glutamate	0.487172	0.572274	0.563065	0.476938	0.517028	0.550801	0.451828	0.413824	0.385705	0.372187	0.345824	0.415508
N-Acetyl-L-alanine	0.8248	0.922939	0.941428	0.778998	0.971956	0.922796	0.403357	0.692997	0.581747	0.386995	0.659331	0.637424
N-acetyl-L-ornithine	0.206425	0.225008	0.24731	0.222833	0.280572	0.366805	0.868946	1.82863	1.04841	1.04876	2.11764	1.28886
N-carbamoyl-L-aspartate	1.86519	1.99582	2.47929	2.03317	2.0606	2.86991	0.830177	1.3438	1.25853	0.900757	1.45605	1.7193
NAD+	15.6561	15.7959	13.9562	13.4882	13.2869	13.9767	16.9408	12.2123	12.1093	13.6698	9.96098	11.4852
NADP+	2.79346	2.52915	2.33392	2.45309	2.55916	2.31464	0.82987	0.786057	0.553412	0.740033	0.709769	0.573308
NADPH	1.89058	0.882276	1.44254	1.27977	1.79004	1.31362	0.455519	0.317546	0.800266	0.488642	0.42393	0.706677
nicotinamide mononucleotide	0.0922597	0.079741	0.0547883	0.0557293	0.0670847	0.051817	0.0690407	0.0404663	0.038353	0.048789	0.0386233	0.0453903
nicotinate	0.164435	0.212397	0.386304	0.140955	0.205349	0.337165	0.0890047	0.124661	0.251951	0.0916817	0.0911993	0.181555
Nicotinic acid mononucleotide	1.48055	1.36228	1.11036	1.35893	1.22755	1.02958	1.45101	1.31619	0.961529	0.968432	0.985374	0.958781
Octulose Bisphosphate	0.170263	0.178889	0.195881	0.158802	0.154288	0.168602	0.200615	0.15121	0.144138	0.210144	0.117047	0.149824
ornithine	0.340966	0.194156	0.185251	0.264941	0.184764	0.227144	0.368234	0.13194	0.10955	0.192537	0.0985297	0.145587
orotate	0.149698	0.188445	0.270918	0.141466	0.237545	0.489865	0.119136	0.129576	0.134225	0.10559	0.157969	0.273692
Phenol Red	0.872147	0.742604	0.837432	0.975844	0.765174	0.840119	2.19217	2.76322	3.939	2.57565	2.58645	3.67836
Phenylacetyl-CoA	0.000473	0.000397333	0.000135	0.000389333	0.000175333	0.000145333	0.00525933	0.000161	0.0001765	0.000273	0.000132333	0.000115333
phosphoenolpyruvate	2.94597	1.53399	1.82704	2.52486	1.62422	1.90597	2.33851	1.15944	1.75041	2.11177	1.02952	1.3644
PTT	0.0533557	0.0605217	0.0606283	0.0354433	0.057348	0.0806453	0.146471	0.248378	0.177734	0.165669	0.320065	0.25605
pyridoxine	0.216144	0.20983	0.182791	0.49608	0.234024	0.278813	0.689528	0.318686	0.306202	0.576477	0.269195	0.228992
Pyroglutamic acid	18.1901	18.7679	14.387	21.1231	18.534	17.3926	18.86	15.8201	12.7131	17.7943	13.3051	11.3413
ribose	0.147841	0.145253	0.124237	0.50583	0.19872	0.162304	0.541129	0.242724	0.268547	0.635815	0.200322	0.150664
ribulose-5-phosphate	3.99236	3.49835	2.49391	2.24113	2.438	4.3313	2.29465	1.97234	1.61479	2.41497	1.49053	2.14506
S-adenosyl-L-homocysteine	0.417591	0.523836	0.522302	0.339705	0.338372	0.426351	0.367573	0.574443	0.59216	0.293903	0.2907	0.467857
Sedoheptulose bisphosphate	0.615527	0.452069	0.469461	0.51199	0.44934	0.459111	0.755689	0.322455	0.460836	0.796979	0.304683	0.433182
sn-glycerol-3-phosphate	40.5846	38.1611	18.9568	34.0629	32.9703	23.9206	52.8137	31.2378	9.73951	52.1482	26.8074	10.2947
succinate/Methylmalonic acid	23.457	14.3397	7.05341	15.4632	11.6282	9.33246	12.5045	14.608	12.0774	13.5331	14.8806	15.5029
taurine	0.132249	0.15177	0.0516923	0.128802	0.071232	0.075035	0.203993	0.0918017	0.0665625	0.076627	0.198896	0.0792523
thiamine	0.247193	0.302067	0.190092	0.184939	0.194031	0.285641	0.143388	0.107934	0.102185	0.071114	0.0872213	0.157653
threonine/homoserine	1.9819	1.619	1.42725	1.78257	1.5573	1.9819	2.04963	1.42763	1.46718	1.81727	1.37884	1.64017
trehalose/sucrose	0.0558767	0.0876047	0.0293607	0.0391813	0.0332013	0.046822	0.00748433	0.0274337	0.055309	0.036582	0.0217493	0.031874
UDP	0.972983	2.0496	2.70208	0.805917	1.56008	1.79946	0.823387	1.24849	1.40257	0.988186	1.05808	1.26428
UDP-D-glucose	2.79578	2.17985	2.27391	2.23667	1.86305	1.82691	6.43912	2.29231	2.34278	7.02409	1.80572	1.88549
UDP-D-glucuronate	0.369872	0.288317	0.28074	0.330004	0.314012	0.27111	0.257388	0.176187	0.19239	0.195349	0.149864	0.176153
UDP-N-acetyl-glucosamine	1.39921	1.44291	1.66374	1.20469	1.32965	1.33923	2.22525	1.68175	2.12326	2.07566	1.41743	1.90205
UMP	2.90221	4.41789	4.12147	2.96547	3.6727	2.90106	2.61049	2.57565	2.12806	2.56807	2.41534	2.03852
UTP	24.5615	25.7611	26.038	23.5047	23.7793	24.2772	19.5871	18.7227	20.2781	19.7253	15.9971	17.4962

## Sheet: log(2) med norm counts
	NF54 +aTc			NF54 No aTc			Dd2 +aTc			Dd2 No aTc
2-dehydro-D-gluconate	-4.68053	-5.27895	-6.59977	-4.19706	-5.92381	-5.44721	-3.00726	-5.3887	-6.15144	-4.90584	-6.10459	-5.6568
2_3-Diphosphoglyceric acid	6.35264	5.4744	5.49236	6.44294	5.64178	5.51125	6.24013	5.26677	5.52899	6.23383	5.12918	5.26154
3-phosphoglycerate	3.3297	2.45417	2.68375	3.10399	2.60326	2.69759	3.0544	2.02699	2.46652	2.85639	1.84856	2.25981
4-aminobutyrate	-0.714074	-0.0639037	-0.546549	-0.414815	-0.329758	-0.24254	-0.799137	-0.749462	-0.790951	-1.30553	-0.995238	-0.196866
4-phosphopantothenate	1.18935	1.51952	1.68953	1.03391	1.52395	1.56235	0.0438848	0.330236	0.671889	0.13132	0.385939	0.601738
4-Pyridoxic acid	-1.25719	-1.27604	-1.61482	-1.04273	-1.4207	-1.48785	-0.641956	-1.08465	-1.85817	-1.28265	-1.53751	-1.714
5-phosphoribosyl-1-pyrophosphate	2.5537	1.54306	2.68389	2.13399	2.18421	2.4827	-0.484649	-0.233354	1.19411	0.61626	0.447049	1.64405
6-phospho-D-gluconate	0.297168	-0.253749	-0.23996	-0.0216521	-0.214113	-0.322748	-0.274391	-0.760088	-0.929432	-0.286394	-1.12894	-1.06202
a-ketoglutarate	3.40085	3.77922	3.22249	3.58228	3.46523	3.56794	2.89466	3.07821	2.65301	2.64588	2.74	2.63157
acetyl-aspartate	-3.27617	-3.23367	-3.30787	-3.75255	-3.44713	-3.35664	-1.55224	-3.47346	-3.14025	-1.64564	-3.72069	-3.21189
acetyl-CoA	-2.63567	-2.72343	-2.38529	-2.73352	-2.72362	-2.5374	-2.69875	-3.27102	-3.02781	-2.83622	-3.50579	-3.22376
Acetyllysine	-2.51558	-2.41669	-2.37065	-2.73627	-2.32301	-2.00674	-0.820019	0.0104872	-0.442952	-0.882626	0.102341	-0.162919
aconitate	-1.95623	-1.77954	-2.5016	-1.63615	-1.51665	-2.67598	-2.08063	-2.68621	-3.35526	-1.91333	-2.16865	-2.85757
ADP-D-glucose	-2.68687	-3.23065	-3.01649	-2.70261	-3.0431	-3.17477	-2.06058	-3.62169	-3.28428	-3.06817	-3.78859	-3.55236
alanine/sarcosine	-1.0075	-1.2282	-1.08571	-1.57922	-1.43805	-0.81403	-0.299588	-1.27964	-1.20361	-0.339158	-0.969897	-0.536855
CDP	-3.19226	-2.04315	-1.33682	-3.21783	-2.39536	-2.04896	-2.7808	-2.53276	-2.06789	-2.51061	-2.80033	-2.38591
CDP-choline	-4.09015	-4.03517	-4.25069	-4.16463	-4.08416	-4.09355	-3.7992	-4.15921	-4.26626	-3.94823	-4.42491	-4.27955
CDP-ethanolamine	1.63818	1.65382	1.45585	1.43439	1.4155	1.54805	2.10938	1.28564	1.3018	1.92248	0.987197	1.24282
Cellobiose	-4.0562	-3.52069	-5.27024	-5.03773	-4.95098	-4.3417	-6.91517	-5.22804	-4.19321	-4.62887	-5.72034	-5.06971
citrulline	-3.65382	-5.94691	-7.35579	-4.3609	-5.83892	-6.18198	-3.72012	-5.21029	-6.02158	-5.16519	-6.36005	-5.46602
creatine	-3.81901	-6.59293	-6.84085	-3.14711	-6.81728	-6.99604	-2.75115	-6.06374	-5.22553	-3.93264	-6.25334	-5.36776
CTP	2.25227	2.49834	2.61822	2.32947	2.29358	2.51194	2.64707	2.17993	2.52208	2.6469	1.84156	2.29511
Cystine	-5.3518	-4.81956	-4.4597	-2.50354	-4.32701	-4.27554	-3.37004	-3.44919	-2.62756	-1.74388	-3.95515	-4.18255
cytidine	6.3826	5.99359	5.32537	6.12018	5.58206	5.32799	6.23825	5.73725	5.34798	6.3585	5.69391	5.56612
D-gluconate	1.36103	1.45256	1.28324	1.40759	1.19356	1.36536	2.35343	0.811237	0.8977	1.35856	0.524859	0.76421
D-sedoheptulose-1/7-phosphate	0.582929	0.447199	0.56604	0.459713	0.680033	1.09519	1.14205	0.734623	0.849422	1.1184	0.582857	0.995867
dAMP	-6.99168	-5.39382	-4.9317	-6.53118	-5.79071	-5.2191	-7.60103	-6.46015	-4.98812	-7.15267	-6.63136	-5.8751
dATP	0.348947	0.207855	0.0631439	0.20507	0.207004	-0.0892535	0.170605	0.214879	0.0868564	0.215809	0.00339067	-0.0565037
dCDP	-5.2583	-3.39052	-2.97106	-5.47079	-3.75387	-3.52875	-6.74061	-4.19414	-4.96748	-6.98808	-4.3586	-4.39986
dCMP	-3.48824	-3.04124	-3.64437	-3.99501	-3.19879	-3.90983	-5.4021	-3.85523	-4.63686	-5.5255	-3.69973	-4.50573
dCTP	0.290654	0.797831	0.759299	0.0438839	0.615367	0.690681	-0.773821	0.361835	-0.00293598	-0.634045	0.219278	-0.104149
dGDP/ADP	2.71683	3.44088	3.60967	2.5884	3.1191	2.9822	2.83546	3.19012	3.10977	2.80118	2.95017	2.85298
dGMP/AMP	0.619978	1.64124	1.96905	0.383296	1.09138	1.47849	0.592063	0.922199	1.46923	0.592991	0.767793	1.15612
dGTP/ATP	6.55499	6.56711	6.32092	6.69553	6.4292	6.0814	6.72841	6.61209	6.43951	6.56628	6.3393	6.15471
dihydroorotate	-1.34035	-1.6515	-1.44109	-1.74864	-1.60415	-1.05898	-2.41676	-1.83738	-1.69373	-2.39693	-1.55046	-1.48393
DL-Pipecolic Acid	1.40401	1.3548	1.29623	0.878174	1.23289	1.40673	0.455582	1.19983	1.03731	0.536911	0.940181	1.00212
dTDP	-2.19566	-1.47475	-1.42344	-2.68668	-1.76973	-2.01765	-2.79231	-2.05352	-2.15762	-2.64044	-2.23977	-2.22673
dTMP	-4.45512	-4.0973	-3.82799	-5.30409	-4.05678	-3.96847	-5.844	-5.14601	-4.839	-5.77067	-5.11555	-4.5433
dTTP	1.73367	1.67364	1.32599	1.4635	1.64015	1.21341	0.943352	1.40489	1.18015	1.0311	1.14936	1.0122
FAD	-3.23336	-2.9729	-2.84219	-3.28394	-3.14855	-3.04482	-3.33086	-3.5598	-3.43719	-3.3037	-3.75189	-3.58979
fructose-1-6-bisphosphate	3.00373	2.15956	1.93569	2.88024	2.30037	2.00635	3.21038	1.95019	2.0996	2.81587	1.63784	2.05133
fructose-6-phosphate/glucose-1-phosphate	4.03673	3.31307	3.02072	3.81517	3.69985	3.35158	4.24624	4.0723	3.88552	4.08646	3.9874	4.09754
fumarate	1.91727	2.03194	2.16683	1.68586	1.84987	2.21188	1.17018	1.01084	1.05965	1.19322	0.906221	1.10974
GDP	-1.49051	-0.377489	0.110365	-1.37717	-0.775169	-0.416382	-0.887668	-0.63449	-0.394763	-0.818341	-0.913137	-0.729768
glucono-lactone	-0.23764	-1.987	-2.75665	0.238023	-1.76028	-2.11358	1.08475	-1.37879	-1.75798	-0.919367	-1.86777	-1.45783
glutathione disulfide	2.2465	2.92328	2.84898	2.77186	2.46639	3.07975	2.81086	2.32733	1.91642	2.13942	1.89775	2.12771
GMP	-0.996838	0.22325	0.198298	-0.32794	-0.130284	-0.0342007	0.00836736	-0.0497625	-0.370306	-0.0869593	-0.17001	-0.475189
GTP	3.03984	3.47141	3.47589	3.4939	3.19335	3.4911	3.83781	3.56654	3.60067	3.78032	3.23775	3.2578
guanine	-4.48503	-3.93336	-2.05566	-3.96971	-3.74607	-2.31823	-3.42439	-3.00988	-1.76057	-3.60196	-3.3925	-2.12836
Hexose	2.70194	2.32821	2.31858	4.40383	3.03301	2.68631	4.4702	3.27976	3.49643	4.77925	3.05085	2.59304
hydroxyproline/Aminolevulinate	1.1165	0.755798	0.527032	1.11474	0.676871	0.6471	1.2718	0.53207	0.590631	1.11309	0.280545	0.429605
hypoxanthine	1.97021	1.39453	1.51484	3.49385	2.05279	2.01087	4.04195	2.99787	3.02154	3.69744	2.77548	2.58899
IDP	-6.35516	-9.78352	-10.1879	-4.84157	-10.2645	-9.61944	-2.95281	-10.1952	-6.99797	-5.22821	-10.2674	-7.98284
IMP	2.36185	1.53109	1.64914	2.50412	1.82347	1.75806	3.48308	1.65254	1.66112	2.04011	1.32925	1.62233
inosine	-3.2012	-2.21921	-2.60667	-3.03071	-2.00054	-2.27741	-1.87909	-1.63162	-2.67191	-3.09186	-2.08196	-2.68232
L-arginino-succinate	-4.54175	-5.63879	-5.79226	-4.6093	-5.56277	-4.98161	-4.28656	-7.00435	-6.99521	-4.84394	-7.15671	-6.41616
lactate	6.29626	6.02146	6.48042	6.05679	6.22642	6.83576	5.99702	5.96153	6.72813	5.45725	5.16282	6.43959
malate	5.49488	5.55784	5.76618	5.21252	5.40456	5.73212	4.73241	4.54834	4.62531	4.77088	4.47695	4.65585
myo-inositol	-2.93332	-2.311	-1.07387	-3.06021	-1.97122	-0.557851	-2.83258	-3.34664	-1.06153	-3.37737	-3.87488	-1.36735
N-acetyl-glucosamine	-5.09833	-6.47628	-6.84184	-4.12835	-7.46932	-6.43131	-3.6607	-6.24985	-5.55775	-4.68443	-6.44222	-5.61145
N-acetyl-glutamate	-1.0375	-0.805222	-0.828627	-1.06813	-0.951685	-0.860397	-1.14615	-1.27291	-1.37443	-1.4259	-1.53189	-1.26705
N-Acetyl-L-alanine	-0.277884	-0.115693	-0.0870773	-0.360308	-0.0410376	-0.115917	-1.30987	-0.52908	-0.781537	-1.36961	-0.600925	-0.649676
N-acetyl-L-ornithine	-2.27631	-2.15195	-2.01561	-2.16597	-1.83356	-1.44691	-0.202661	0.870761	0.0681996	0.0686887	1.08246	0.366091
N-carbamoyl-L-aspartate	0.899324	0.99698	1.30993	1.02373	1.04306	1.52101	-0.268509	0.426318	0.331739	-0.15079	0.542058	0.781817
NAD+	3.96866	3.98148	3.80284	3.75363	3.73194	3.80495	4.08243	3.61026	3.59804	3.77292	3.31629	3.5217
NADP+	1.48205	1.33865	1.22275	1.2946	1.35567	1.21079	-0.269043	-0.347295	-0.853573	-0.434338	-0.494578	-0.802617
NADPH	0.918829	-0.180698	0.528609	0.355889	0.839992	0.393544	-1.13442	-1.65496	-0.321448	-1.03315	-1.2381	-0.500876
nicotinamide mononucleotide	-3.43816	-3.64853	-4.18999	-4.16542	-3.89787	-4.27043	-3.85641	-4.62713	-4.70452	-4.3573	-4.69438	-4.46147
nicotinate	-2.60441	-2.23517	-1.37219	-2.82669	-2.28385	-1.56847	-3.48998	-3.00391	-1.98879	-3.44722	-3.45483	-2.46152
Nicotinic acid mononucleotide	0.566131	0.44602	0.151022	0.442473	0.295782	0.0420513	0.537057	0.396365	-0.0565977	-0.0462778	-0.0212572	-0.0607268
Octulose Bisphosphate	-2.55417	-2.48286	-2.35195	-2.6547	-2.69631	-2.56831	-2.3175	-2.72538	-2.79448	-2.25055	-3.09484	-2.73866
ornithine	-1.5523	-2.36471	-2.43244	-1.91626	-2.43624	-2.13832	-1.4413	-2.92204	-3.19034	-2.37679	-3.3433	-2.78005
orotate	-2.73987	-2.40778	-1.88407	-2.82147	-2.07373	-1.02954	-3.06932	-2.94813	-2.89727	-3.24345	-2.66229	-1.86938
Phenol Red	-0.197356	-0.429334	-0.255957	-0.0352776	-0.386141	-0.251335	1.13236	1.46635	1.97783	1.36493	1.37097	1.87906
Phenylacetyl-CoA	-11.0459	-11.2974	-12.8548	-11.3267	-12.4776	-12.7483	-7.5709	-12.6007	-12.468	-11.8388	-12.8835	-13.0819
phosphoenolpyruvate	1.55874	0.61729	0.869508	1.3362	0.699745	0.930529	1.22559	0.21343	0.807692	1.07845	0.0419714	0.448269
PTT	-4.22821	-4.0464	-4.04386	-4.81834	-4.12411	-3.63227	-2.77131	-2.00939	-2.4922	-2.59363	-1.64356	-1.9655
pyridoxine	-2.20994	-2.2527	-2.45173	-1.01136	-2.09527	-1.84263	-0.53632	-1.64979	-1.70744	-0.794666	-1.89328	-2.12663
Pyroglutamic acid	4.18508	4.23019	3.84669	4.40075	4.2121	4.1204	4.23726	3.98369	3.66825	4.15334	3.73391	3.50351
ribose	-2.75788	-2.78336	-3.00883	-0.983276	-2.33119	-2.62323	-0.885956	-2.04261	-1.89675	-0.653321	-2.3196	-2.7306
ribulose-5-phosphate	1.99724	1.80668	1.31841	1.16423	1.2857	2.1148	1.19827	0.97991	0.691348	1.272	0.575826	1.10101
S-adenosyl-L-homocysteine	-1.25984	-0.932814	-0.937044	-1.55765	-1.56332	-1.22989	-1.4439	-0.799764	-0.755941	-1.76659	-1.7824	-1.09586
Sedoheptulose bisphosphate	-0.700105	-1.14539	-1.09092	-0.965813	-1.15412	-1.12308	-0.404136	-1.63283	-1.11767	-0.327387	-1.71462	-1.20695
sn-glycerol-3-phosphate	5.34286	5.25403	4.24464	5.09013	5.0431	4.58018	5.72284	4.96522	3.28385	5.70455	4.74456	3.36384
succinate/Methylmalonic acid	4.55195	3.84194	2.81832	3.95076	3.53956	3.22226	3.64437	3.86868	3.59423	3.75842	3.89537	3.95446
taurine	-2.91867	-2.72004	-4.27391	-2.95678	-3.81133	-3.73629	-2.29341	-3.44534	-3.90915	-3.706	-2.32992	-3.6574
thiamine	-2.01629	-1.72706	-2.39523	-2.43488	-2.36564	-1.80772	-2.802	-3.21177	-3.29074	-3.81372	-3.51918	-2.66518
threonine/homoserine	0.986885	0.695104	0.513239	0.833956	0.639046	0.986885	1.03536	0.513622	0.553048	0.861775	0.463451	0.713847
trehalose/sucrose	-4.16161	-3.51285	-5.08997	-4.67369	-4.91262	-4.41667	-7.06191	-5.18791	-4.17634	-4.77272	-5.52289	-4.97148
UDP	-0.039514	1.03534	1.43407	-0.311297	0.641619	0.847565	-0.280357	0.32019	0.488073	-0.0171455	0.0814487	0.338315
UDP-D-glucose	1.48325	1.12423	1.18517	1.16135	0.897664	0.869403	2.68686	1.1968	1.22822	2.81231	0.852575	0.914937
UDP-D-glucuronate	-1.4349	-1.79427	-1.83269	-1.59944	-1.67111	-1.88305	-1.95799	-2.50482	-2.37789	-2.35588	-2.73828	-2.5051
UDP-N-acetyl-glucosamine	0.484614	0.528986	0.734428	0.268664	0.411044	0.421408	1.15397	0.749962	1.08628	1.05357	0.503277	0.927552
UMP	1.53715	2.14336	2.04316	1.56826	1.87684	1.53658	1.38432	1.36493	1.08954	1.36068	1.27223	1.02752
UTP	4.61833	4.68712	4.70255	4.55487	4.57164	4.60153	4.29183	4.22672	4.34185	4.30198	3.99974	4.12897
arginine	0.722955	0.617903	0.455583	0.699609	0.321287	0.565457	0.300048	-0.469547	-0.297241	0.30536	-0.597094	-0.134287
asparagine	2.65334	2.24738	2.07958	2.26861	2.07871	2.428	2.54416	1.82856	1.95851	2.36288	1.81815	2.28706
aspartate	4.73983	5.05479	4.93083	4.93863	4.96907	5.26515	5.19628	5.25306	5.27733	5.19966	5.30135	5.54971
glutamate	7.06687	7.20161	7.14568	7.13293	7.10711	7.22568	6.64503	6.69651	6.73183	6.50273	6.55538	6.68738
glutamine	4.55323	4.13702	3.96165	4.66753	4.17876	4.28486	4.59675	3.92426	4.09882	4.47283	3.74701	3.99166
histidine	-0.495805	-0.724204	-0.952026	-0.718292	-0.694333	-0.375308	0.214532	-0.521661	-0.922875	0.18247	-0.363933	-0.355913
isoleucine	4.17362	3.97582	4.03741	4.75923	4.23009	4.4948	4.82215	4.10116	4.24513	4.76081	4.18962	4.19685
lysine	0.076196	-0.191853	-0.0017525	-0.17131	-0.0298993	0.463168	-0.979626	-1.07794	-0.830988	-0.977854	-0.809842	-0.320128
methionine	0.905886	0.529139	0.552982	1.69026	1.019	1.25728	1.88811	0.757478	0.851831	1.76507	0.875296	0.819407
proline	0.134194	0.00651634	0.026122	0.476754	0.13104	0.339213	0.576531	-0.0378513	0.249633	0.498899	-0.102066	0.15855
serine	0.701017	0.242004	-0.0274769	0.395637	0.126432	0.470447	0.831974	-0.0216506	0.000106755	0.585703	-0.0477534	0.330701
tryptophan	0.87245	0.257425	0.554228	1.08832	0.570564	0.769632	1.30138	0.271761	0.805755	1.0664	0.400237	0.697953
tyrosine	2.86831	2.61643	2.61657	3.22219	2.81179	3.0595	3.3339	2.58565	2.74602	3.19256	2.60368	2.70281
valine	1.84148	1.63654	1.58194	1.91657	1.68819	2.06902	1.92161	1.38522	1.44419	1.72467	1.40121	1.60048
PE	0.640903	0.762485	0.607974	0.736514	0.876066	1.28166	3.35289	4.41081	3.4322	3.6342	4.56731	4.19574
PD	2.93677	3.16016	2.762	2.702	2.91242	3.09628	3.17435	4.12753	3.41211	3.27554	4.10408	3.97821
PEEK	-4.01912	-3.32562	-3.42515	-3.80788	-3.35864	-3.02298	-3.15013	-2.76179	-3.21951	-3.16192	-2.50694	-2.87396
DLH	0.157123	0.782051	0.272292	0.61366	0.662254	0.481856	1.25367	2.07483	1.16104	1.48044	2.1692	1.66145
SD	-1.83406	-1.76508	-1.98623	-1.48218	-1.45574	-1.12823	-0.72386	-0.0939945	-0.744374	-0.35919	0.284368	0.0387279
SID	-1.24035	-1.06227	-0.934463	-0.952444	-0.737483	-0.805464	0.505791	1.23055	0.793087	0.784991	1.44935	0.77526
VD	-0.155449	-0.336202	-0.809936	-0.971517	-0.593882	0.218997	0.595589	1.463	0.564963	0.828308	1.79216	1.62126
LD	-3.85831	-3.97353	-3.68684	-3.64626	-3.74738	-2.90241	-2.93738	-2.89668	-3.19053	-2.89101	-2.51047	-2.45619
SDL/DLS	-1.23006	-1.05032	-0.938487	-0.95841	-0.733942	-0.81063	0.499265	1.20486	0.781973	0.784165	1.44257	0.768606
VDPVNF	-4.62962	-4.20978	-3.87187	-4.23775	-3.92148	-3.63634	-4.04066	-4.19854	-4.427	-3.75447	-3.82173	-4.02466

## Sheet: paired multiple t test NF54
Results	Discovery?	P value	Mean of NF54 No aTc	Mean of NF54 +aTc	Difference	SE of difference	t ratio	df	q value
2-dehydro-D-gluconate	No	0.593114	-5.189	-5.52	0.3304	0.5245	0.6299	2	0.918643
2_3-Diphosphoglyceric acid	No	0.164507	5.865	5.773	0.09219	0.04288	2.15	2	0.562746
3-phosphoglycerate	No	0.866175	2.802	2.823	-0.02093	0.1096	0.191	2	0.966326
4-aminobutyrate	No	0.612442	-0.329	-0.4415	0.1125	0.1892	0.5946	2	0.918643
4-phosphopantothenate	No	0.20048	1.373	1.466	-0.09273	0.04926	1.882	2	0.562746
4-Pyridoxic acid	No	0.605764	-1.317	-1.383	0.06559	0.1081	0.6067	2	0.918643
5-phosphoribosyl-1-pyrophosphate	No	0.985245	2.267	2.26	0.006749	0.3234	0.02087	2	>0.999999
6-phospho-D-gluconate	No	0.37009	-0.1862	-0.06551	-0.1207	0.1052	1.147	2	0.734012
a-ketoglutarate	No	0.754574	3.538	3.468	0.07097	0.1982	0.358	2	0.951712
acetyl-aspartate	No	0.186642	-3.519	-3.273	-0.2462	0.1245	1.977	2	0.562746
acetyl-CoA	No	0.201486	-2.665	-2.581	-0.08338	0.04445	1.876	2	0.562746
Acetyllysine	No	0.686135	-2.355	-2.434	0.07897	0.1689	0.4675	2	0.951712
aconitate	No	0.475085	-1.943	-2.079	0.1362	0.1562	0.8722	2	0.82447
ADP-D-glucose	No	0.968238	-2.973	-2.978	0.004509	0.1003	0.04494	2	>0.999999
alanine/sarcosine	No	0.558555	-1.277	-1.107	-0.17	0.2443	0.6958	2	0.916438
CDP	No	0.208365	-2.554	-2.191	-0.3633	0.1983	1.832	2	0.562746
CDP-choline	No	0.8924	-4.114	-4.125	0.01122	0.07333	0.1531	2	0.986773
CDP-ethanolamine	No	0.38189	1.466	1.583	-0.1166	0.1049	1.112	2	0.734109
Cellobiose	No	0.564752	-4.777	-4.282	-0.4944	0.7232	0.6837	2	0.916438
citrulline	No	0.758604	-5.461	-5.652	0.1916	0.5446	0.3518	2	0.951712
creatine	No	0.767239	-5.653	-5.751	0.09745	0.2879	0.3385	2	0.951712
CTP	No	0.445031	2.378	2.456	-0.07795	0.08262	0.9435	2	0.79438
Cystine	No	0.297352	-3.702	-4.877	1.175	0.8414	1.397	2	0.670995
cytidine	No	0.205895	5.677	5.901	-0.2238	0.1211	1.848	2	0.562746
D-gluconate	No	0.727065	1.322	1.366	-0.04344	0.1083	0.4012	2	0.951712
D-sedoheptulose-1/7-phosphate	No	0.376087	0.745	0.5321	0.2129	0.1886	1.129	2	0.734109
dAMP	No	0.807868	-5.847	-5.772	-0.07459	0.2694	0.2769	2	0.951712
dATP	No	0.181505	0.1076	0.2066	-0.09904	0.04916	2.015	2	0.562746
dCDP	No	0.063349	-4.251	-3.873	-0.3778	0.09991	3.782	2	0.423439
dCMP	No	0.095348	-3.701	-3.391	-0.3099	0.1032	3.002	2	0.493881
dCTP	No	0.085995	0.45	0.6159	-0.166	0.05209	3.186	2	0.488413
dGDP/ADP	No	0.131933	2.897	3.256	-0.3592	0.1453	2.473	2	0.549501
dGMP/AMP	No	0.047322	0.9844	1.41	-0.4257	0.09605	4.432	2	0.423439
dGTP/ATP	No	0.558897	6.402	6.481	-0.07897	0.1136	0.6951	2	0.916438
dihydroorotate	No	0.978211	-1.471	-1.478	0.00706	0.2291	0.03082	2	>0.999999
DL-Pipecolic Acid	No	0.43704	1.173	1.352	-0.1791	0.1859	0.9633	2	0.79438
dTDP	No	0.034512	-2.158	-1.698	-0.4601	0.08776	5.243	2	0.423439
dTMP	No	0.364035	-4.443	-4.127	-0.3163	0.2714	1.165	2	0.733648
dTTP	No	0.184262	1.439	1.578	-0.1387	0.06957	1.994	2	0.562746
FAD	No	0.092674	-3.159	-3.016	-0.143	0.04684	3.052	2	0.493881
fructose-1-6-bisphosphate	No	0.74623	2.396	2.366	0.02933	0.07905	0.371	2	0.951712
fructose-6-phosphate/glucose-1-phosphate	No	0.484062	3.622	3.457	0.1654	0.1941	0.8518	2	0.828542
fumarate	No	0.285879	1.916	2.039	-0.1228	0.08513	1.443	2	0.661493
GDP	No	0.300726	-0.8562	-0.5859	-0.2704	0.1954	1.383	2	0.670995
glucono-lactone	No	0.065656	-1.212	-1.66	0.4485	0.121	3.708	2	0.423439
glutathione disulfide	No	0.764453	2.773	2.673	0.09975	0.291	0.3428	2	0.951712
GMP	No	0.939555	-0.1641	-0.1918	0.02762	0.3225	0.08564	2	>0.999999
GTP	No	0.792733	3.393	3.329	0.06374	0.2127	0.2996	2	0.951712
guanine	No	0.582101	-3.345	-3.491	0.1467	0.2255	0.6505	2	0.918643
Hexose	No	0.147247	3.374	2.45	0.9248	0.4005	2.309	2	0.562746
hydroxyproline/Aminolevulinate	No	0.841757	0.8129	0.7998	0.01313	0.05792	0.2266	2	0.951712
hypoxanthine	No	0.107481	2.519	1.627	0.8926	0.319	2.799	2	0.497396
IDP	No	0.452001	-8.242	-8.776	0.5337	0.576	0.9265	2	0.795458
IMP	No	0.084817	2.029	1.847	0.1812	0.05642	3.211	2	0.488413
inosine	No	0.036424	-2.436	-2.676	0.2395	0.047	5.095	2	0.423439
L-arginino-succinate	No	0.421154	-5.051	-5.324	0.273	0.272	1.004	2	0.78542
lactate	No	0.610024	6.373	6.266	0.1069	0.1786	0.5989	2	0.918643
malate	No	0.160651	5.45	5.606	-0.1566	0.0717	2.184	2	0.562746
myo-inositol	No	0.332788	-1.863	-2.106	0.243	0.1918	1.267	2	0.716929
N-acetyl-glucosamine	No	0.845458	-6.01	-6.139	0.1292	0.5839	0.2212	2	0.951712
N-acetyl-glutamate	No	0.211677	-0.9601	-0.8904	-0.06962	0.03842	1.812	2	0.562746
N-Acetyl-L-alanine	No	0.816028	-0.1724	-0.1602	-0.0122	0.0461	0.2647	2	0.951712
N-acetyl-L-ornithine	No	0.128834	-1.815	-2.148	0.3325	0.1325	2.509	2	0.549501
N-carbamoyl-L-aspartate	No	0.116369	1.196	1.069	0.1272	0.04765	2.669	2	0.519296
NAD+	No	0.189465	3.764	3.918	-0.1542	0.07877	1.957	2	0.562746
NADP+	No	0.441643	1.287	1.348	-0.0608	0.06388	0.9518	2	0.79438
NADPH	No	0.841234	0.5298	0.4222	0.1076	0.473	0.2274	2	0.951712
nicotinamide mononucleotide	No	0.210513	-4.111	-3.759	-0.3523	0.1937	1.819	2	0.562746
nicotinate	No	0.102305	-2.226	-2.071	-0.1558	0.05406	2.881	2	0.493881
Nicotinic acid mononucleotide	No	0.008836	0.2601	0.3877	-0.1276	0.01208	10.57	2	0.423439
Octulose Bisphosphate	No	0.043514	-2.64	-2.463	-0.1768	0.03813	4.636	2	0.423439
ornithine	No	0.827584	-2.164	-2.116	-0.04712	0.1904	0.2475	2	0.951712
orotate	No	0.306158	-1.975	-2.344	0.369	0.2708	1.363	2	0.671131
Phenol Red	No	0.277813	-0.2243	-0.2942	0.06996	0.04738	1.477	2	0.661493
Phenylacetyl-CoA	No	0.357788	-12.18	-11.73	-0.4516	0.3811	1.185	2	0.732879
phosphoenolpyruvate	No	0.81371	0.9888	1.015	-0.02636	0.09829	0.2681	2	0.951712
PTT	No	0.795573	-4.192	-4.106	-0.08541	0.2892	0.2953	2	0.951712
pyridoxine	No	0.161856	-1.65	-2.305	0.655	0.3014	2.173	2	0.562746
Pyroglutamic acid	No	0.220213	4.244	4.087	0.1571	0.08918	1.762	2	0.573243
ribose	No	0.194077	-1.979	-2.85	0.8708	0.4523	1.925	2	0.562746
ribulose-5-phosphate	No	0.745458	1.522	1.707	-0.1859	0.4993	0.3722	2	0.951712
S-adenosyl-L-homocysteine	No	0.067777	-1.45	-1.043	-0.4071	0.1117	3.643	2	0.423439
Sedoheptulose bisphosphate	No	0.338961	-1.081	-0.9788	-0.1022	0.08203	1.246	2	0.717851
sn-glycerol-3-phosphate	No	0.842627	4.904	4.947	-0.04271	0.1895	0.2254	2	0.951712
succinate/Methylmalonic acid	No	0.632475	3.571	3.737	-0.1665	0.298	0.5589	2	0.929739
taurine	No	0.719283	-3.501	-3.304	-0.1973	0.4769	0.4136	2	0.951712
thiamine	No	0.718544	-2.203	-2.046	-0.1566	0.3774	0.4148	2	0.951712
threonine/homoserine	No	0.694929	0.82	0.7317	0.08822	0.1947	0.453	2	0.951712
trehalose/sucrose	No	0.562784	-4.668	-4.255	-0.4128	0.6005	0.6875	2	0.916438
UDP	No	0.044966	0.3926	0.81	-0.4173	0.09162	4.555	2	0.423439
UDP-D-glucose	No	0.011244	0.9761	1.264	-0.2881	0.03081	9.351	2	0.423439
UDP-D-glucuronate	No	0.749725	-1.718	-1.687	-0.03058	0.08364	0.3656	2	0.951712
UDP-N-acetyl-glucosamine	No	0.061933	0.367	0.5827	-0.2156	0.05631	3.829	2	0.423439
UMP	No	0.252708	1.661	1.908	-0.2473	0.1555	1.59	2	0.644406
UTP	No	0.026515	4.576	4.669	-0.09332	0.01551	6.018	2	0.423439
arginine	No	0.617575	0.5288	0.5988	-0.07003	0.1196	0.5853	2	0.918643
asparagine	No	0.783145	2.258	2.327	-0.06833	0.2175	0.3142	2	0.951712
aspartate	No	0.351467	5.058	4.908	0.1491	0.1238	1.205	2	0.731929
glutamate	No	0.787828	7.155	7.138	0.01719	0.05599	0.307	2	0.951712
glutamine	No	0.198814	4.377	4.217	0.1597	0.08437	1.893	2	0.562746
histidine	No	0.641665	-0.596	-0.724	0.128	0.2359	0.5428	2	0.93228
isoleucine	No	0.04633	4.495	4.062	0.4324	0.09646	4.483	2	0.423439
lysine	No	0.602514	0.08732	-0.03914	0.1265	0.2064	0.6126	2	0.918643
methionine	No	0.017312	1.322	0.6627	0.6595	0.08792	7.501	2	0.423439
proline	No	0.06257	0.3157	0.05561	0.2601	0.0683	3.808	2	0.423439
serine	No	0.925367	0.3308	0.3052	0.02566	0.2424	0.1058	2	>0.999999
tryptophan	No	0.016725	0.8095	0.5614	0.2481	0.0325	7.635	2	0.423439
tyrosine	No	0.044732	3.031	2.7	0.3307	0.0724	4.568	2	0.423439
valine	No	0.284836	1.891	1.687	0.2046	0.1414	1.447	2	0.661493
PE	No	0.261103	0.9647	0.6705	0.2943	0.1898	1.551	2	0.647554
PD	No	0.820848	2.904	2.953	-0.04941	0.1919	0.2575	2	0.951712
PEEK	No	0.264308	-3.397	-3.59	0.1935	0.1259	1.536	2	0.647554
DLH	No	0.389245	0.5859	0.4038	0.1821	0.1669	1.091	2	0.736912
SD	No	0.102768	-1.355	-1.862	0.5064	0.1762	2.874	2	0.493881
SID	No	0.054269	-0.8318	-1.079	0.2472	0.06007	4.116	2	0.423439
VD	No	0.980667	-0.4488	-0.4339	-0.01494	0.5463	0.02735	2	>0.999999
LD	No	0.163119	-3.432	-3.84	0.4075	0.1885	2.162	2	0.562746
SDL/DLS	No	0.052376	-0.8343	-1.073	0.2386	0.05687	4.196	2	0.423439
VDPVNF	No	0.021892	-3.932	-4.237	0.3052	0.04592	6.647	2	0.423439

## Sheet: paired multiple t test Dd2
	Discovery?	P value	Mean of Dd2 No aTc	Mean of Dd2 +aTc	Difference	SE of difference	t ratio	df	q value
2-dehydro-D-gluconate	No	0.413983	-5.556	-4.849	-0.7066	0.6909	1.023	2	0.64659
2_3-Diphosphoglyceric acid	No	0.210555	5.542	5.679	-0.1371	0.07539	1.819	2	0.548757
3-phosphoglycerate	No	0.001844	2.322	2.516	-0.1944	0.00836	23.25	2	0.230464
4-aminobutyrate	No	0.888479	-0.8325	-0.7799	-0.05269	0.332	0.1587	2	>0.999999
4-phosphopantothenate	No	0.663361	0.373	0.3487	0.02433	0.04812	0.5056	2	0.884361
4-Pyridoxic acid	No	0.312884	-1.511	-1.195	-0.3165	0.2366	1.337	2	0.599466
5-phosphoribosyl-1-pyrophosphate	No	0.059822	0.9025	0.1587	0.7437	0.1906	3.903	2	0.442604
6-phospho-D-gluconate	No	0.244061	-0.8258	-0.6546	-0.1711	0.1048	1.633	2	0.560438
a-ketoglutarate	No	0.164431	2.672	2.875	-0.2028	0.09429	2.151	2	0.548757
acetyl-aspartate	No	0.130746	-2.859	-2.722	-0.1374	0.05527	2.487	2	0.548757
acetyl-CoA	No	0.021573	-3.189	-2.999	-0.1894	0.02828	6.698	2	0.332939
Acetyllysine	No	0.407338	-0.3144	-0.4175	0.1031	0.09907	1.041	2	0.644264
aconitate	No	0.073943	-2.313	-2.707	0.3942	0.1136	3.47	2	0.442604
ADP-D-glucose	No	0.211235	-3.47	-2.989	-0.4809	0.265	1.815	2	0.548757
alanine/sarcosine	No	0.265286	-0.6153	-0.9276	0.3123	0.2039	1.532	2	0.571509
CDP	No	0.632653	-2.566	-2.46	-0.1051	0.1882	0.5586	2	0.868682
CDP-choline	No	0.189592	-4.218	-4.075	-0.1427	0.07293	1.956	2	0.548757
CDP-ethanolamine	No	0.119806	1.384	1.566	-0.1814	0.06918	2.623	2	0.548757
Cellobiose	No	0.787903	-5.14	-5.445	0.3058	0.9964	0.3069	2	0.986492
citrulline	No	0.389463	-5.664	-4.984	-0.6798	0.6235	1.09	2	0.628993
creatine	No	0.274948	-5.185	-4.68	-0.5044	0.3388	1.489	2	0.582283
CTP	No	0.198659	2.261	2.45	-0.1885	0.0995	1.894	2	0.548757
Cystine	No	0.891151	-3.294	-3.149	-0.1449	0.9359	0.1549	2	>0.999999
cytidine	No	0.32624	5.873	5.774	0.09835	0.07627	1.289	2	0.599466
D-gluconate	No	0.217504	0.8825	1.354	-0.4716	0.2653	1.777	2	0.548757
D-sedoheptulose-1/7-phosphate	No	0.921201	0.899	0.9087	-0.009655	0.08637	0.1118	2	>0.999999
dAMP	No	0.650876	-6.553	-6.35	-0.2033	0.3858	0.5269	2	0.883989
dATP	No	0.310996	0.05423	0.1574	-0.1032	0.07677	1.344	2	0.599466
dCDP	No	0.859706	-5.249	-5.301	0.05189	0.259	0.2004	2	>0.999999
dCMP	No	0.603898	-4.577	-4.631	0.05441	0.08918	0.6101	2	0.866339
dCTP	No	0.731768	-0.173	-0.1383	-0.03466	0.08803	0.3938	2	0.942622
dGDP/ADP	No	0.131778	2.868	3.045	-0.177	0.07153	2.475	2	0.548757
dGMP/AMP	No	0.228374	0.839	0.9945	-0.1555	0.09066	1.716	2	0.548757
dGTP/ATP	No	0.025477	6.353	6.593	-0.2399	0.03904	6.145	2	0.332939
dihydroorotate	No	0.162273	-1.81	-1.983	0.1722	0.07936	2.169	2	0.548757
DL-Pipecolic Acid	No	0.550697	0.8264	0.8976	-0.07117	0.1001	0.7112	2	0.819162
dTDP	No	0.761044	-2.369	-2.334	-0.0345	0.09913	0.348	2	0.970331
dTMP	No	0.246691	-5.143	-5.276	0.1332	0.0822	1.62	2	0.560438
dTTP	No	0.390705	1.064	1.176	-0.1119	0.103	1.087	2	0.628993
FAD	No	0.257275	-3.548	-3.443	-0.1058	0.06747	1.569	2	0.563974
fructose-1-6-bisphosphate	No	0.137539	2.168	2.42	-0.2517	0.1044	2.41	2	0.548757
fructose-6-phosphate/glucose-1-phosphate	No	0.932332	4.057	4.068	-0.01089	0.1135	0.09592	2	>0.999999
fumarate	No	0.846255	1.07	1.08	-0.0105	0.0477	0.22	2	>0.999999
GDP	No	0.28774	-0.8204	-0.639	-0.1814	0.1264	1.435	2	0.598808
glucono-lactone	No	0.392648	-1.415	-0.684	-0.731	0.6761	1.081	2	0.628993
glutathione disulfide	No	0.377074	2.055	2.352	-0.2966	0.2634	1.126	2	0.628993
GMP	No	0.004586	-0.2441	-0.1372	-0.1068	0.007259	14.72	2	0.245694
GTP	No	0.120229	3.425	3.668	-0.243	0.09287	2.617	2	0.548757
guanine	No	0.042655	-3.041	-2.732	-0.3093	0.06602	4.686	2	0.409975
Hexose	No	0.51591	3.474	3.749	-0.2744	0.3507	0.7824	2	0.776662
hydroxyproline/Aminolevulinate	No	0.024802	0.6077	0.7982	-0.1904	0.03056	6.231	2	0.332939
hypoxanthine	No	0.031863	3.021	3.354	-0.3332	0.06093	5.467	2	0.332939
IDP	No	0.224322	-7.826	-6.715	-1.111	0.6391	1.738	2	0.548757
IMP	No	0.295488	1.664	2.266	-0.6017	0.4286	1.404	2	0.598808
inosine	No	0.253161	-2.619	-2.061	-0.5578	0.3512	1.588	2	0.563974
L-arginino-succinate	No	0.907757	-6.139	-6.095	-0.04357	0.3325	0.131	2	>0.999999
lactate	No	0.066479	5.687	6.229	-0.5423	0.1473	3.682	2	0.442604
malate	No	0.984136	4.635	4.635	-0.0007936	0.03537	0.02244	2	>0.999999
myo-inositol	No	0.026968	-2.873	-2.414	-0.4596	0.07705	5.966	2	0.332939
N-acetyl-glucosamine	No	0.297128	-5.579	-5.156	-0.4233	0.3029	1.397	2	0.598808
N-acetyl-glutamate	No	0.371203	-1.408	-1.264	-0.1438	0.1257	1.144	2	0.628993
N-Acetyl-L-alanine	No	0.999016	-0.8734	-0.8735	9.178e-05	0.06598	0.001391	2	>0.999999
N-acetyl-L-ornithine	No	0.00945	0.5057	0.2454	0.2603	0.02549	10.21	2	0.245694
N-carbamoyl-L-aspartate	No	0.176803	0.391	0.1632	0.2278	0.1111	2.05	2	0.548757
NAD+	No	0.094877	3.537	3.764	-0.2266	0.07527	3.011	2	0.483845
NADP+	No	0.335123	-0.5772	-0.49	-0.08721	0.06928	1.259	2	0.606864
NADPH	No	0.579464	-0.924	-1.037	0.1129	0.1722	0.6555	2	0.841907
nicotinamide mononucleotide	No	0.665305	-4.504	-4.396	-0.1084	0.2157	0.5023	2	0.884361
nicotinate	No	0.223174	-3.121	-2.828	-0.2936	0.1683	1.745	2	0.548757
Nicotinic acid mononucleotide	No	0.191158	-0.04275	0.2923	-0.335	0.1722	1.945	2	0.548757
Octulose Bisphosphate	No	0.624799	-2.695	-2.612	-0.08223	0.1437	0.5724	2	0.86743
ornithine	No	0.505468	-2.833	-2.518	-0.3155	0.3921	0.8047	2	0.770223
orotate	No	0.39136	-2.592	-2.972	0.3799	0.3502	1.085	2	0.628993
Phenol Red	No	0.917843	1.538	1.526	0.01281	0.1099	0.1166	2	>0.999999
Phenylacetyl-CoA	No	0.309941	-12.6	-10.88	-1.722	1.277	1.348	2	0.599466
phosphoenolpyruvate	No	0.077929	0.5229	0.7489	-0.226	0.06708	3.369	2	0.442604
PTT	No	0.071464	-2.068	-2.424	0.3567	0.1009	3.537	2	0.442604
pyridoxine	No	0.031975	-1.605	-1.298	-0.307	0.05626	5.457	2	0.332939
Pyroglutamic acid	No	0.073969	3.797	3.963	-0.1661	0.04788	3.47	2	0.442604
ribose	No	0.442163	-1.901	-1.608	-0.2927	0.308	0.9505	2	0.682078
ribulose-5-phosphate	No	0.921066	0.9829	0.9565	0.02644	0.2361	0.112	2	>0.999999
S-adenosyl-L-homocysteine	No	0.127499	-1.548	-0.9999	-0.5484	0.2172	2.525	2	0.548757
Sedoheptulose bisphosphate	No	0.620139	-1.083	-1.052	-0.03144	0.05414	0.5807	2	0.86743
sn-glycerol-3-phosphate	No	0.610147	4.604	4.657	-0.05299	0.08851	0.5987	2	0.866339
succinate/Methylmalonic acid	No	0.236444	3.869	3.702	0.167	0.09986	1.672	2	0.557429
taurine	No	0.985568	-3.231	-3.216	-0.01514	0.7419	0.02041	2	>0.999999
thiamine	No	0.674077	-3.333	-3.102	-0.2312	0.4742	0.4875	2	0.886588
threonine/homoserine	No	0.849715	0.6797	0.7007	-0.02099	0.09763	0.215	2	>0.999999
trehalose/sucrose	No	0.726457	-5.089	-5.475	0.3864	0.9606	0.4022	2	0.942622
UDP	No	0.812422	0.1342	0.176	-0.04176	0.1546	0.2701	2	>0.999999
UDP-D-glucose	No	0.362753	1.527	1.704	-0.1774	0.1517	1.169	2	0.628993
UDP-D-glucuronate	No	0.084816	-2.533	-2.28	-0.2529	0.07874	3.211	2	0.460772
UDP-N-acetyl-glucosamine	No	0.058108	0.8281	0.9967	-0.1686	0.04252	3.965	2	0.442604
UMP	No	0.096808	1.22	1.28	-0.05945	0.01998	2.976	2	0.483845
UTP	No	0.203171	4.144	4.287	-0.1432	0.0768	1.865	2	0.548757
arginine	No	0.886434	-0.142	-0.1556	0.01357	0.08396	0.1617	2	>0.999999
asparagine	No	0.789509	2.156	2.11	0.04562	0.1498	0.3045	2	0.986492
aspartate	No	0.323737	5.35	5.242	0.108	0.0832	1.298	2	0.599466
glutamate	No	0.07787	6.582	6.691	-0.1093	0.03242	3.371	2	0.442604
glutamine	No	0.023267	4.071	4.207	-0.1361	0.02113	6.441	2	0.332939
histidine	No	0.321493	-0.1791	-0.41	0.2309	0.1767	1.306	2	0.599466
isoleucine	No	0.896458	4.382	4.389	-0.007053	0.04791	0.1472	2	>0.999999
lysine	No	0.218715	-0.7026	-0.9628	0.2602	0.147	1.77	2	0.548757
methionine	No	0.874664	1.153	1.166	-0.01255	0.07024	0.1787	2	>0.999999
proline	No	0.009832	0.1851	0.2628	-0.07764	0.007756	10.01	2	0.245694
serine	No	0.918625	0.2896	0.2701	0.01941	0.1681	0.1155	2	>0.999999
tryptophan	No	0.571413	0.7215	0.793	-0.07143	0.1065	0.6709	2	0.839977
tyrosine	No	0.354281	2.833	2.889	-0.05551	0.04641	1.196	2	0.623485
valine	No	0.943478	1.575	1.584	-0.008221	0.1027	0.08006	2	>0.999999
PE	No	0.162951	4.132	3.732	0.4005	0.1851	2.164	2	0.548757
PD	No	0.354147	3.786	3.571	0.2146	0.1794	1.196	2	0.623485
PEEK	No	0.208812	-2.848	-3.044	0.1962	0.1072	1.83	2	0.548757
DLH	No	0.149109	1.77	1.497	0.2738	0.1196	2.291	2	0.548757
SD	No	0.065701	-0.01203	-0.5207	0.5087	0.1373	3.706	2	0.442604
SID	No	0.219444	1.003	0.8431	0.1601	0.09064	1.766	2	0.548757
VD	No	0.173668	1.414	0.8745	0.5394	0.2599	2.075	2	0.548757
LD	No	0.189266	-2.619	-3.008	0.389	0.1986	1.959	2	0.548757
SDL/DLS	No	0.208125	0.9984	0.8287	0.1697	0.09257	1.834	2	0.548757
VDPVNF	No	0.009706	-3.867	-4.222	0.3551	0.03524	10.08	2	0.245694

## Sheet: paired multiple t test combined
	Discovery?	P value	Mean of -aTc	Mean of +aTc	Difference	SE of difference	t ratio	df	q value
2-dehydro-D-gluconate	No	0.694502	-5.373	-5.184	-0.1881	0.4519	0.4162	5	0.836276
2_3-Diphosphoglyceric acid	No	0.74104	5.703	5.726	-0.02246	0.06429	0.3494	5	0.866578
3-phosphoglycerate	No	0.146167	2.562	2.669	-0.1077	0.06261	1.719	5	0.402445
4-aminobutyrate	No	0.870966	-0.5808	-0.6107	0.02989	0.1748	0.1709	5	0.952009
4-phosphopantothenate	No	0.436065	0.8732	0.9074	-0.0342	0.04042	0.8462	5	0.709923
4-Pyridoxic acid	No	0.424561	-1.414	-1.289	-0.1254	0.1443	0.8691	5	0.709923
5-phosphoribosyl-1-pyrophosphate	No	0.171569	1.585	1.209	0.3752	0.2352	1.595	5	0.416812
6-phospho-D-gluconate	No	0.082559	-0.506	-0.3601	-0.1459	0.06736	2.166	5	0.350611
a-ketoglutarate	No	0.593448	3.105	3.171	-0.06592	0.1157	0.5698	5	0.777634
acetyl-aspartate	No	0.032864	-3.189	-2.997	-0.1918	0.0656	2.924	5	0.239521
acetyl-CoA	No	0.009532	-2.927	-2.79	-0.1364	0.03342	4.081	5	0.178993
Acetyllysine	No	0.347059	-1.335	-1.426	0.09103	0.08774	1.037	5	0.641801
aconitate	No	0.051048	-2.128	-2.393	0.2652	0.1039	2.554	5	0.274991
ADP-D-glucose	No	0.212775	-3.222	-2.983	-0.2382	0.1668	1.428	5	0.479325
alanine/sarcosine	No	0.706625	-0.9462	-1.017	0.07117	0.1785	0.3986	5	0.841835
CDP	No	0.143764	-2.56	-2.326	-0.2342	0.1352	1.732	5	0.402445
CDP-choline	No	0.305907	-4.166	-4.1	-0.06572	0.05765	1.14	5	0.603043
CDP-ethanolamine	No	0.050139	1.425	1.574	-0.149	0.05803	2.568	5	0.274991
Cellobiose	No	0.876995	-4.958	-4.864	-0.0943	0.579	0.1629	5	0.952009
citrulline	No	0.584918	-5.562	-5.318	-0.2441	0.4184	0.5834	5	0.777634
creatine	No	0.435388	-5.419	-5.216	-0.2035	0.2401	0.8475	5	0.709923
CTP	No	0.087723	2.32	2.453	-0.1332	0.0629	2.118	5	0.350611
Cystine	No	0.454521	-3.498	-4.013	0.515	0.6355	0.8104	5	0.709923
cytidine	No	0.543871	5.775	5.838	-0.06272	0.09636	0.6508	5	0.757142
D-gluconate	No	0.168373	1.102	1.36	-0.2575	0.16	1.61	5	0.416812
D-sedoheptulose-1/7-phosphate	No	0.378659	0.822	0.7204	0.1016	0.1053	0.9655	5	0.67994
dAMP	No	0.541921	-6.2	-6.061	-0.1389	0.2124	0.6541	5	0.757142
dATP	No	0.055847	0.08092	0.182	-0.1011	0.04078	2.48	5	0.281651
dCDP	No	0.346763	-4.75	-4.587	-0.163	0.157	1.038	5	0.641801
dCMP	No	0.264852	-4.139	-4.011	-0.1278	0.1018	1.255	5	0.54692
dCTP	No	0.124274	0.1385	0.2388	-0.1003	0.05435	1.845	5	0.384938
dGDP/ADP	No	0.02329	2.882	3.15	-0.2681	0.08309	3.227	5	0.205912
dGMP/AMP	No	0.018442	0.9117	1.202	-0.2906	0.08449	3.44	5	0.205912
dGTP/ATP	No	0.05683	6.378	6.537	-0.1594	0.06466	2.466	5	0.281651
dihydroorotate	No	0.469329	-1.641	-1.73	0.08962	0.1145	0.7825	5	0.717899
DL-Pipecolic Acid	No	0.255431	0.9995	1.125	-0.1251	0.09745	1.284	5	0.536405
dTDP	No	0.07846	-2.264	-2.016	-0.2473	0.1121	2.206	5	0.347185
dTMP	No	0.595903	-4.793	-4.702	-0.09158	0.1618	0.5659	5	0.777634
dTTP	No	0.075033	1.252	1.377	-0.1253	0.0559	2.242	5	0.344317
FAD	No	0.021397	-3.354	-3.229	-0.1244	0.03766	3.303	5	0.205912
fructose-1-6-bisphosphate	No	0.252127	2.282	2.393	-0.1112	0.08591	1.294	5	0.536405
fructose-6-phosphate/glucose-1-phosphate	No	0.506605	3.84	3.762	0.07723	0.108	0.715	5	0.739302
fumarate	No	0.242859	1.493	1.559	-0.06665	0.05035	1.324	5	0.527898
GDP	No	0.086231	-0.8383	-0.6124	-0.2259	0.106	2.132	5	0.350611
glucono-lactone	No	0.741382	-1.313	-1.172	-0.1412	0.4049	0.3489	5	0.866578
glutathione disulfide	No	0.637978	2.414	2.512	-0.09841	0.1966	0.5005	5	0.798439
GMP	No	0.798903	-0.2041	-0.1645	-0.0396	0.1474	0.2687	5	0.90055
GTP	No	0.503465	3.409	3.499	-0.08965	0.1244	0.7205	5	0.739302
guanine	No	0.602525	-3.193	-3.111	-0.08132	0.1464	0.5554	5	0.777634
Hexose	No	0.406071	3.424	3.099	0.3252	0.3586	0.9068	5	0.709923
hydroxyproline/Aminolevulinate	No	0.162386	0.7103	0.799	-0.08865	0.05412	1.638	5	0.410745
hypoxanthine	No	0.408475	2.77	2.49	0.2797	0.3102	0.9019	5	0.709923
IDP	No	0.610968	-8.034	-7.745	-0.2886	0.5322	0.5422	5	0.780402
IMP	No	0.456771	1.846	2.056	-0.2102	0.2608	0.8061	5	0.709923
inosine	No	0.534114	-2.527	-2.368	-0.1592	0.2385	0.6673	5	0.757142
L-arginino-succinate	No	0.599403	-5.595	-5.71	0.1147	0.2048	0.5604	5	0.777634
lactate	No	0.276551	6.03	6.247	-0.2177	0.1783	1.221	5	0.561716
malate	No	0.175792	5.042	5.121	-0.07868	0.04992	1.576	5	0.418859
myo-inositol	No	0.578193	-2.368	-2.26	-0.1083	0.1823	0.5943	5	0.777634
N-acetyl-glucosamine	No	0.664215	-5.795	-5.647	-0.1471	0.319	0.4609	5	0.814815
N-acetyl-glutamate	No	0.141115	-1.184	-1.077	-0.1067	0.06109	1.747	5	0.402445
N-Acetyl-L-alanine	No	0.873361	-0.5229	-0.5169	-0.006056	0.0361	0.1677	5	0.952009
N-acetyl-L-ornithine	No	0.005127	-0.6549	-0.9513	0.2964	0.06246	4.745	5	0.158794
N-carbamoyl-L-aspartate	No	0.029048	0.7935	0.616	0.1775	0.05857	3.031	5	0.224943
NAD+	No	0.013885	3.65	3.841	-0.1904	0.05134	3.708	5	0.191147
NADP+	No	0.142514	0.3549	0.4289	-0.074	0.04255	1.739	5	0.402445
NADPH	No	0.645094	-0.1971	-0.3073	0.1102	0.2251	0.4897	5	0.799271
nicotinamide mononucleotide	No	0.162441	-4.308	-4.077	-0.2304	0.1407	1.638	5	0.410745
nicotinate	No	0.045542	-2.674	-2.449	-0.2247	0.08486	2.648	5	0.274991
Nicotinic acid mononucleotide	No	0.050138	0.1087	0.34	-0.2313	0.09007	2.568	5	0.274991
Octulose Bisphosphate	No	0.122485	-2.667	-2.538	-0.1295	0.06975	1.857	5	0.384938
ornithine	No	0.414727	-2.498	-2.317	-0.1813	0.2039	0.889	5	0.709923
orotate	No	0.117171	-2.283	-2.658	0.3744	0.198	1.891	5	0.384938
Phenol Red	No	0.48581	0.657	0.6156	0.04139	0.05502	0.7522	5	0.734047
Phenylacetyl-CoA	No	0.160666	-12.39	-11.31	-1.087	0.6601	1.646	5	0.410745
phosphoenolpyruvate	No	0.128983	0.7559	0.882	-0.1262	0.06946	1.817	5	0.38978
PTT	No	0.458385	-3.13	-3.265	0.1357	0.1689	0.8031	5	0.709923
pyridoxine	No	0.525475	-1.627	-1.801	0.174	0.2551	0.6821	5	0.75705
Pyroglutamic acid	No	0.959745	4.021	4.025	-0.004525	0.08528	0.05305	5	>0.999999
ribose	No	0.455168	-1.94	-2.229	0.289	0.3572	0.8092	5	0.709923
ribulose-5-phosphate	No	0.76411	1.252	1.332	-0.07971	0.2515	0.3169	5	0.876604
S-adenosyl-L-homocysteine	No	0.008476	-1.499	-1.022	-0.4777	0.1137	4.202	5	0.178993
Sedoheptulose bisphosphate	No	0.212013	-1.082	-1.015	-0.06682	0.04672	1.43	5	0.479325
sn-glycerol-3-phosphate	No	0.630851	4.754	4.802	-0.04785	0.09357	0.5114	5	0.797577
succinate/Methylmalonic acid	No	0.998938	3.72	3.72	0.0002225	0.1591	0.001399	5	>0.999999
taurine	No	0.79952	-3.366	-3.26	-0.1062	0.3965	0.2678	5	0.90055
thiamine	No	0.507189	-2.768	-2.574	-0.1939	0.2715	0.714	5	0.739302
threonine/homoserine	No	0.751424	0.7498	0.7162	0.03362	0.1004	0.3347	5	0.870107
trehalose/sucrose	No	0.981286	-4.878	-4.865	-0.01324	0.5372	0.02465	5	>0.999999
UDP	No	0.105299	0.2634	0.493	-0.2296	0.1162	1.975	5	0.383721
UDP-D-glucose	No	0.024929	1.251	1.484	-0.2327	0.07351	3.166	5	0.205912
UDP-D-glucuronate	No	0.104235	-2.125	-1.984	-0.1417	0.07148	1.983	5	0.383721
UDP-N-acetyl-glucosamine	No	0.002188	0.5976	0.7897	-0.1921	0.03326	5.776	5	0.135531
UMP	No	0.119402	1.44	1.594	-0.1534	0.08174	1.877	5	0.384938
UTP	No	0.023561	4.36	4.478	-0.1183	0.03677	3.216	5	0.205912
arginine	No	0.695209	0.1934	0.2216	-0.02823	0.06799	0.4152	5	0.836276
asparagine	No	0.928773	2.207	2.219	-0.01136	0.1208	0.09398	5	0.992026
aspartate	No	0.114427	5.204	5.075	0.1286	0.06733	1.91	5	0.384938
glutamate	No	0.306632	6.869	6.915	-0.04605	0.04046	1.138	5	0.603043
glutamine	No	0.883624	4.224	4.212	0.01182	0.07674	0.154	5	0.952009
histidine	No	0.237566	-0.3876	-0.567	0.1795	0.1338	1.341	5	0.525614
isoleucine	No	0.109591	4.439	4.226	0.2127	0.1094	1.943	5	0.384938
lysine	No	0.159959	-0.3076	-0.501	0.1933	0.1172	1.65	5	0.410745
methionine	No	0.096726	1.238	0.9142	0.3235	0.1585	2.041	5	0.374513
proline	No	0.314113	0.2504	0.1592	0.09121	0.08153	1.119	5	0.608103
serine	No	0.871082	0.3102	0.2877	0.02253	0.1319	0.1708	5	0.952009
tryptophan	No	0.356918	0.7655	0.6772	0.08835	0.08709	1.014	5	0.650326
tyrosine	No	0.205285	2.932	2.794	0.1376	0.09454	1.456	5	0.479325
valine	No	0.332249	1.733	1.635	0.09819	0.0915	1.073	5	0.633317
PE	No	0.034865	2.549	2.201	0.3474	0.1209	2.873	5	0.239986
PD	No	0.557411	3.345	3.262	0.0826	0.1315	0.6283	5	0.767369
PEEK	No	0.04633	-3.122	-3.317	0.1948	0.07398	2.634	5	0.274991
DLH	No	0.059902	1.178	0.9502	0.228	0.09409	2.423	5	0.285458
SD	No	0.003831	-0.6837	-1.191	0.5076	0.0999	5.081	5	0.158238
SID	No	0.011557	0.0857	-0.1179	0.2036	0.05239	3.887	5	0.178993
VD	No	0.418559	0.4826	0.2203	0.2622	0.2976	0.8812	5	0.709923
LD	No	0.022683	-3.026	-3.424	0.3983	0.1225	3.25	5	0.205912
SDL/DLS	No	0.01026	0.08206	-0.1221	0.2042	0.05097	4.006	5	0.178993
VDPVNF	Yes	8e-05	-3.899	-4.23	0.3302	0.02819	11.71	5	0.009876
